# Supplementary material for: Low TCR Binding Strength Results in Increased Progenitor-like CD8+ Tumor-Infiltrating Lymphocytes
Source: Oxford University Press journal article supplement (doi:10.1158/2326-6066.cir-22-0761), 2023-02-14
Supplement: cir-22-0761_table_s6_suppst6.xlsx [file cir-22-0761_table_s6_suppst6.xlsx]

## Sheet: Supplemental Table 6_Differenti
	p_val	avg_log2FC	pct.1	pct.2	p_val_adj	cluster	gene
S100a6	0	0.991149	0.968	0.871	0	0	S100a6
Lgals3	0	0.840951	0.959	0.787	0	0	Lgals3
S100a11	0	0.699568	0.989	0.94	0	0	S100a11
Nkg7	0	0.568345	0.999	0.981	0	0	Nkg7
Eef1a1	0	0.315833	1	0.999	0	0	Eef1a1
Ptma	0	-0.911447	0.998	0.996	0	0	Ptma
Spc24	0	-0.937217	0.058	0.479	0	0	Spc24
Cks1b	0	-1.19183	0.113	0.549	0	0	Cks1b
Stmn1	0	-1.34103	0.164	0.603	0	0	Stmn1
Tuba1b	0	-1.80407	0.592	0.817	0	0	Tuba1b
Tubb5	0	-1.89528	0.768	0.901	0	0	Tubb5
Hmgb2	0	-1.93777	0.93	0.949	0	0	Hmgb2
Pclaf	0	-2.06268	0.14	0.576	0	0	Pclaf
Mcm7	2.1e-305	-0.775686	0.17	0.588	2.45e-301	0	Mcm7
Birc5	1.51e-304	-1.51876	0.05	0.443	1.77e-300	0	Birc5
Smc2	9.12e-304	-1.1056	0.195	0.589	1.07e-299	0	Smc2
Cdca8	7.49e-299	-1.04469	0.037	0.426	8.76e-295	0	Cdca8
Rrm2	1.03e-288	-1.13461	0.04	0.422	1.21e-284	0	Rrm2
Tagln2	1.37e-288	-0.816675	0.725	0.918	1.61e-284	0	Tagln2
H2afz	5.18e-288	-1.01196	0.967	0.954	6.06e-284	0	H2afz
Ran	6.99e-287	-0.795714	0.928	0.931	8.17e-283	0	Ran
Asf1b	5.49e-274	-0.617677	0.032	0.405	6.43e-270	0	Asf1b
Anp32b	4.27e-273	-0.693817	0.923	0.935	5e-269	0	Anp32b
Lmnb1	1.07e-269	-0.873801	0.307	0.655	1.25e-265	0	Lmnb1
Lig1	3.12e-268	-0.823987	0.214	0.595	3.66e-264	0	Lig1
Ctsd	9.33e-266	0.629812	0.992	0.919	1.09e-261	0	Ctsd
Cdk1	1.28e-263	-0.803046	0.057	0.423	1.5e-259	0	Cdk1
Tk1	8.74e-254	-0.710418	0.142	0.514	1.02e-249	0	Tk1
Nucks1	4.86e-251	-0.818327	0.662	0.84	5.69e-247	0	Nucks1
Ccna2	2.67e-248	-0.747466	0.01	0.341	3.13e-244	0	Ccna2
Myl6	2.78e-245	0.438166	0.998	0.991	3.26e-241	0	Myl6
Dek	9.7e-245	-0.786948	0.804	0.893	1.13e-240	0	Dek
Rfc4	1.02e-243	-0.580896	0.145	0.518	1.2e-239	0	Rfc4
S100a4	1.43e-243	0.711548	0.978	0.846	1.68e-239	0	S100a4
Tpx2	2.09e-238	-0.714482	0.024	0.353	2.44e-234	0	Tpx2
Hist1h3c	1.9e-235	-1.24676	0.047	0.378	2.23e-231	0	Hist1h3c
Tmpo	3.33e-235	-0.879891	0.47	0.731	3.89e-231	0	Tmpo
Pglyrp1	9.62e-234	0.675245	0.923	0.741	1.13e-229	0	Pglyrp1
Lat2	1.53e-233	0.641117	0.772	0.517	1.78e-229	0	Lat2
Mcm5	5.28e-229	-0.640965	0.243	0.6	6.18e-225	0	Mcm5
Cxcr6	6.9e-229	0.701091	0.957	0.808	8.07e-225	0	Cxcr6
Rad51	6.29e-228	-0.435917	0.027	0.352	7.35e-224	0	Rad51
Fxyd5	3.2e-225	0.3921	0.998	0.992	3.74e-221	0	Fxyd5
Dhfr	8.56e-225	-0.511083	0.07	0.412	1e-220	0	Dhfr
Tacc3	1.05e-224	-0.502811	0.03	0.351	1.23e-220	0	Tacc3
Ccnb2	1.3e-224	-0.884762	0.045	0.367	1.52e-220	0	Ccnb2
Clspn	1.5e-223	-0.601148	0.071	0.406	1.75e-219	0	Clspn
Rrm1	4.5e-221	-0.591757	0.166	0.518	5.27e-217	0	Rrm1
Knl1	1.79e-220	-0.639201	0.015	0.321	2.09e-216	0	Knl1
Hcst	2.71e-220	0.543337	0.983	0.952	3.17e-216	0	Hcst
Gmnn	4.19e-218	-0.672667	0.316	0.634	4.91e-214	0	Gmnn
Cenph	4.4e-217	-0.421366	0.024	0.335	5.15e-213	0	Cenph
Ccdc34	5.27e-217	-0.649521	0.132	0.477	6.16e-213	0	Ccdc34
Anp32e	1.59e-215	-0.67507	0.447	0.732	1.86e-211	0	Anp32e
Nusap1	2.68e-215	-1.0354	0.047	0.357	3.14e-211	0	Nusap1
Tubb4b	2.97e-214	-1.28425	0.396	0.667	3.48e-210	0	Tubb4b
Cd3g	6.38e-213	0.483999	0.992	0.992	7.46e-209	0	Cd3g
Cdca3	6.85e-213	-0.546177	0.023	0.325	8.01e-209	0	Cdca3
Mki67	1.03e-212	-1.34574	0.182	0.499	1.21e-208	0	Mki67
Rad51ap1	9.01e-211	-0.409874	0.007	0.299	1.05e-206	0	Rad51ap1
Nasp	2.99e-210	-0.641033	0.432	0.714	3.49e-206	0	Nasp
Lsm3	4.75e-210	-0.564931	0.349	0.672	5.56e-206	0	Lsm3
Aurkb	3.42e-207	-0.532677	0.027	0.325	4e-203	0	Aurkb
Rps15a	9.68e-207	0.261148	1	0.998	1.13e-202	0	Rps15a
Hmmr	6.44e-206	-0.673495	0.008	0.294	7.53e-202	0	Hmmr
Rfc5	1.36e-205	-0.482306	0.153	0.498	1.59e-201	0	Rfc5
Hnrnpab	5.5e-205	-0.655847	0.715	0.848	6.44e-201	0	Hnrnpab
Mad2l1	5.2e-200	-0.460438	0.087	0.409	6.08e-196	0	Mad2l1
AW112010	3.93e-199	0.4891	0.999	0.991	4.6e-195	0	AW112010
Hmgn2	1.27e-198	-0.827892	0.453	0.702	1.49e-194	0	Hmgn2
Cdc45	1.94e-198	-0.344503	0.019	0.308	2.27e-194	0	Cdc45
Cep55	2.9e-198	-0.462562	0.021	0.309	3.39e-194	0	Cep55
Hells	2.49e-197	-0.633931	0.282	0.607	2.91e-193	0	Hells
Uhrf1	4.13e-197	-0.449663	0.082	0.399	4.84e-193	0	Uhrf1
Cdc20	4.83e-197	-0.649584	0.022	0.308	5.65e-193	0	Cdc20
Prf1	5.73e-197	0.799898	0.955	0.763	6.71e-193	0	Prf1
Tyms	5.94e-196	-0.703619	0.222	0.536	6.95e-192	0	Tyms
Nrm	1.56e-195	-0.463965	0.127	0.459	1.83e-191	0	Nrm
Ppia	2.38e-195	-0.420864	0.999	0.997	2.78e-191	0	Ppia
Cenps	1.29e-194	-0.378593	0.075	0.392	1.51e-190	0	Cenps
Hist1h1b	6.41e-194	-1.92669	0.224	0.518	7.5e-190	0	Hist1h1b
Ezh2	6.66e-194	-0.667461	0.325	0.627	7.79e-190	0	Ezh2
Klrd1	6.29e-193	0.559697	0.976	0.9	7.35e-189	0	Klrd1
Top2a	8.66e-193	-1.55156	0.35	0.6	1.01e-188	0	Top2a
Ncapd3	3.41e-192	-0.529331	0.133	0.461	3.98e-188	0	Ncapd3
Fbxo5	2.81e-190	-0.507584	0.025	0.305	3.28e-186	0	Fbxo5
Spc25	6.96e-190	-0.451629	0.015	0.288	8.15e-186	0	Spc25
Orc6	6.77e-189	-0.488815	0.179	0.506	7.92e-185	0	Orc6
Hdgf	7.98e-188	-0.60633	0.544	0.769	9.33e-184	0	Hdgf
Prim1	5.81e-185	-0.479598	0.172	0.499	6.8e-181	0	Prim1
Esco2	1.78e-184	-0.527572	0.006	0.266	2.09e-180	0	Esco2
Cenpe	3.41e-184	-0.662147	0.043	0.326	3.99e-180	0	Cenpe
Hist1h2ab	7.97e-184	-0.805019	0.029	0.3	9.32e-180	0	Hist1h2ab
Mcm3	9.41e-184	-0.589467	0.262	0.585	1.1e-179	0	Mcm3
Il2rb	1.82e-183	0.54484	0.978	0.873	2.12e-179	0	Il2rb
Dctpp1	1.47e-182	-0.60485	0.322	0.612	1.72e-178	0	Dctpp1
Cit	9.71e-182	-0.377105	0.013	0.277	1.14e-177	0	Cit
Tipin	3.64e-180	-0.608936	0.352	0.634	4.26e-176	0	Tipin
Cenpw	1.64e-179	-0.60772	0.285	0.582	1.91e-175	0	Cenpw
Cenpf	7.22e-179	-1.00563	0.043	0.317	8.44e-175	0	Cenpf
Shcbp1	8.39e-179	-0.367495	0.006	0.259	9.81e-175	0	Shcbp1
Selenoh	1.29e-178	-0.682176	0.655	0.789	1.51e-174	0	Selenoh
Cd52	2.66e-178	0.420822	0.999	0.997	3.12e-174	0	Cd52
Lag3	5.69e-178	0.549682	0.909	0.709	6.66e-174	0	Lag3
Fen1	1.76e-177	-0.434881	0.16	0.481	2.06e-173	0	Fen1
Lsm2	1.01e-176	-0.564029	0.395	0.673	1.18e-172	0	Lsm2
Ndc80	1.2e-176	-0.362912	0.008	0.26	1.41e-172	0	Ndc80
Ncapg2	1.05e-175	-0.417437	0.064	0.35	1.23e-171	0	Ncapg2
Ugcg	1.48e-175	0.589797	0.93	0.796	1.73e-171	0	Ugcg
Hist1h2ap	1.92e-175	-1.3738	0.133	0.419	2.24e-171	0	Hist1h2ap
Banf1	3.27e-175	-0.543768	0.575	0.781	3.82e-171	0	Banf1
Ncaph	4.73e-175	-0.333445	0.015	0.273	5.53e-171	0	Ncaph
Capg	3.42e-174	0.586896	0.913	0.756	4e-170	0	Capg
Ckap2l	3.8e-174	-0.398156	0.006	0.255	4.45e-170	0	Ckap2l
Impdh2	5.26e-172	-0.524344	0.41	0.695	6.16e-168	0	Impdh2
Gins2	2.43e-171	-0.372926	0.091	0.389	2.84e-167	0	Gins2
Bub1	4.29e-171	-0.352996	0.005	0.248	5.02e-167	0	Bub1
Dut	2.09e-170	-0.809888	0.751	0.808	2.44e-166	0	Dut
Mcm6	2.15e-170	-0.546649	0.266	0.576	2.51e-166	0	Mcm6
Ska1	1.11e-168	-0.313294	0.01	0.257	1.3e-164	0	Ska1
Cst7	5.37e-167	0.496866	0.958	0.844	6.28e-163	0	Cst7
Pmf1	7.45e-167	-0.415044	0.157	0.466	8.71e-163	0	Pmf1
Alyref	8.7e-167	-0.556504	0.535	0.739	1.02e-162	0	Alyref
Hirip3	2.04e-165	-0.379408	0.076	0.359	2.39e-161	0	Hirip3
Ncl	8.65e-165	-0.570421	0.944	0.954	1.01e-160	0	Ncl
Cenpm	3.25e-164	-0.371298	0.058	0.331	3.8e-160	0	Cenpm
Kif23	5.44e-164	-0.44218	0.026	0.279	6.36e-160	0	Kif23
Hist1h2ae	7.75e-164	-1.69038	0.234	0.498	9.07e-160	0	Hist1h2ae
Prc1	1.16e-163	-0.805369	0.105	0.381	1.36e-159	0	Prc1
Cenpk	5.71e-163	-0.335348	0.052	0.324	6.67e-159	0	Cenpk
Cks2	5.85e-163	-0.803594	0.337	0.603	6.85e-159	0	Cks2
Racgap1	3.44e-162	-0.518586	0.134	0.425	4.03e-158	0	Racgap1
Ncapg	5.83e-162	-0.357833	0.038	0.297	6.82e-158	0	Ncapg
H2afx	9.87e-162	-1.01917	0.279	0.55	1.15e-157	0	H2afx
Hmgb3	2.75e-160	-0.459558	0.17	0.466	3.21e-156	0	Hmgb3
Srsf7	2.94e-160	-0.584485	0.578	0.77	3.44e-156	0	Srsf7
Kif11	4.55e-160	-0.477305	0.04	0.294	5.32e-156	0	Kif11
Hist1h2an	4.27e-159	-0.669363	0.055	0.313	4.99e-155	0	Hist1h2an
Hmgb1	2.03e-158	-0.586731	0.988	0.974	2.38e-154	0	Hmgb1
Id2	4.23e-157	0.560616	0.986	0.92	4.95e-153	0	Id2
Hspa8	6.53e-157	-0.468842	0.989	0.989	7.64e-153	0	Hspa8
Snrpd1	7.8e-157	-0.525501	0.774	0.841	9.13e-153	0	Snrpd1
Dnajc9	1.22e-156	-0.557993	0.657	0.815	1.43e-152	0	Dnajc9
Pttg1	1.41e-156	-0.880476	0.286	0.557	1.64e-152	0	Pttg1
Sgo1	1.5e-156	-0.331463	0.01	0.241	1.76e-152	0	Sgo1
Tcf19	4.48e-156	-0.314655	0.026	0.271	5.24e-152	0	Tcf19
Gm47283	4.52e-156	-0.615421	0.733	0.872	5.28e-152	0	Gm47283
Diaph3	2.23e-155	-0.343353	0.023	0.263	2.6e-151	0	Diaph3
Ube2s	8.52e-155	-0.780555	0.755	0.839	9.97e-151	0	Ube2s
Trip13	1.04e-154	-0.263773	0.01	0.238	1.21e-150	0	Trip13
Dlgap5	2.25e-154	-0.374684	0.051	0.309	2.64e-150	0	Dlgap5
Ranbp1	2.21e-153	-0.634004	0.792	0.858	2.58e-149	0	Ranbp1
Pola1	2.84e-153	-0.371762	0.101	0.381	3.32e-149	0	Pola1
Ube2c	4.63e-151	-1.46156	0.117	0.373	5.41e-147	0	Ube2c
Mcm4	4.39e-150	-0.485843	0.269	0.562	5.14e-146	0	Mcm4
Hsp90aa1	6.31e-150	-0.487093	0.917	0.945	7.38e-146	0	Hsp90aa1
Bub1b	1.9e-149	-0.305399	0.014	0.242	2.22e-145	0	Bub1b
Kif4	7.55e-149	-0.312774	0.006	0.224	8.83e-145	0	Kif4
Kif22	1.2e-148	-0.338686	0.021	0.25	1.4e-144	0	Kif22
Anxa2	3.44e-148	0.470878	0.979	0.867	4.03e-144	0	Anxa2
Irf8	4.9e-148	0.617419	0.874	0.683	5.73e-144	0	Irf8
Depdc1a	5.97e-148	-0.317367	0.017	0.243	6.98e-144	0	Depdc1a
Hist1h2bj	7.1e-148	-0.418897	0.058	0.309	8.3e-144	0	Hist1h2bj
Emb	1.35e-147	-0.933431	0.055	0.298	1.58e-143	0	Emb
Mis18bp1	3.81e-147	-0.354246	0.019	0.247	4.45e-143	0	Mis18bp1
Nuf2	4.41e-147	-0.278611	0.004	0.217	5.16e-143	0	Nuf2
Kif20b	7.7e-147	-0.39893	0.053	0.302	9.01e-143	0	Kif20b
Ncapd2	1.55e-146	-0.303065	0.039	0.28	1.82e-142	0	Ncapd2
Pfdn5	1.09e-145	0.338972	0.99	0.984	1.27e-141	0	Pfdn5
Psmc3ip	1.26e-145	-0.268485	0.041	0.286	1.47e-141	0	Psmc3ip
Pbk	3.03e-145	-0.279951	0.004	0.216	3.54e-141	0	Pbk
Haus4	1.12e-144	-0.331018	0.112	0.394	1.31e-140	0	Haus4
Cdca5	7.5e-144	-0.261497	0.006	0.218	8.78e-140	0	Cdca5
Srsf2	1.07e-143	-0.464132	0.827	0.888	1.25e-139	0	Srsf2
Hmgn1	5.4e-143	-0.524233	0.149	0.427	6.31e-139	0	Hmgn1
Exosc8	1.88e-142	-0.449326	0.517	0.74	2.2e-138	0	Exosc8
Ddx39	3.8e-142	-0.479581	0.479	0.711	4.44e-138	0	Ddx39
Sgo2a	2.31e-141	-0.321491	0.008	0.219	2.71e-137	0	Sgo2a
Hist1h2af	4.95e-141	-0.337411	0.004	0.21	5.79e-137	0	Hist1h2af
Cbx3	5.7e-141	-0.461978	0.82	0.882	6.67e-137	0	Cbx3
Tnfrsf9	7.66e-140	0.571075	0.915	0.705	8.96e-136	0	Tnfrsf9
Cbx5	4.1e-137	-0.458653	0.307	0.581	4.79e-133	0	Cbx5
Rfc3	2.01e-136	-0.412201	0.215	0.5	2.35e-132	0	Rfc3
Rangap1	2.69e-136	-0.401992	0.242	0.533	3.15e-132	0	Rangap1
Hnrnpf	5.5e-136	-0.360745	0.944	0.966	6.43e-132	0	Hnrnpf
Fgl2	9.33e-136	0.56656	0.726	0.53	1.09e-131	0	Fgl2
Hjurp	1.03e-135	-0.471305	0.146	0.413	1.21e-131	0	Hjurp
Rbpj	8.99e-135	0.495747	0.89	0.733	1.05e-130	0	Rbpj
Hist1h4d	2.55e-134	-0.934189	0.431	0.643	2.98e-130	0	Hist1h4d
Eva1b	1.22e-133	0.515417	0.713	0.557	1.42e-129	0	Eva1b
Cdk6	1.6e-133	0.579596	0.856	0.693	1.87e-129	0	Cdk6
Acot7	2.48e-133	0.490326	0.79	0.659	2.9e-129	0	Acot7
Smc1a	2.5e-133	-0.531028	0.532	0.738	2.93e-129	0	Smc1a
Pcna	4e-133	-0.581033	0.507	0.703	4.67e-129	0	Pcna
Itgav	6.08e-132	0.519852	0.688	0.506	7.11e-128	0	Itgav
Ckap2	8.7e-132	-0.285346	0.014	0.218	1.02e-127	0	Ckap2
Hat1	1.04e-131	-0.403166	0.259	0.536	1.22e-127	0	Hat1
Hist1h2bm	2.05e-130	-0.292589	0.014	0.217	2.4e-126	0	Hist1h2bm
Plk1	6.69e-130	-0.288156	0.007	0.203	7.83e-126	0	Plk1
Aspm	4.39e-129	-0.361832	0.017	0.22	5.13e-125	0	Aspm
Cdca7	4.49e-129	-0.337368	0.105	0.355	5.26e-125	0	Cdca7
Siva1	1.25e-128	-0.500541	0.446	0.661	1.46e-124	0	Siva1
Cdkn3	3.19e-128	-0.352974	0.031	0.242	3.73e-124	0	Cdkn3
Usp1	7.06e-128	-0.442033	0.372	0.635	8.26e-124	0	Usp1
Snrpf	1.13e-127	-0.383634	0.894	0.918	1.32e-123	0	Snrpf
Ctla2a	1.88e-127	0.645591	0.883	0.759	2.19e-123	0	Ctla2a
Tmsb4x	3.11e-127	0.263279	1	1	3.63e-123	0	Tmsb4x
Mxd3	2e-126	-0.285629	0.008	0.2	2.34e-122	0	Mxd3
Pimreg	4.22e-126	-0.295311	0.004	0.191	4.94e-122	0	Pimreg
Atad5	1.89e-125	-0.286332	0.058	0.288	2.21e-121	0	Atad5
Slc25a5	4.57e-125	-0.418257	0.935	0.941	5.34e-121	0	Slc25a5
Cmc2	4.21e-124	-0.40757	0.262	0.536	4.92e-120	0	Cmc2
Hist1h3e	1.42e-123	-0.703351	0.209	0.45	1.66e-119	0	Hist1h3e
Set	3.77e-123	-0.432585	0.938	0.94	4.41e-119	0	Set
H2afv	4.99e-123	-0.796657	0.691	0.794	5.84e-119	0	H2afv
Ung	8.42e-123	-0.282873	0.033	0.24	9.85e-119	0	Ung
Fabp5	9.65e-123	-0.562521	0.361	0.595	1.13e-118	0	Fabp5
Tox	2.29e-122	0.517991	0.865	0.695	2.68e-118	0	Tox
Klre1	4.37e-122	0.493088	0.819	0.621	5.12e-118	0	Klre1
Snrpg	4.48e-122	-0.316012	0.974	0.975	5.24e-118	0	Snrpg
Cd8a	6.96e-122	0.360469	0.985	0.972	8.15e-118	0	Cd8a
Pa2g4	1.12e-121	-0.48081	0.551	0.736	1.31e-117	0	Pa2g4
Sh3bgrl3	1.34e-121	0.348598	0.996	0.983	1.56e-117	0	Sh3bgrl3
Rbbp7	5.22e-121	-0.440247	0.498	0.714	6.1e-117	0	Rbbp7
Eif5a	6e-121	-0.458622	0.961	0.962	7.02e-117	0	Eif5a
Knstrn	7.82e-121	-0.404137	0.104	0.344	9.15e-117	0	Knstrn
Ccnb1	1.66e-120	-0.323614	0.028	0.228	1.94e-116	0	Ccnb1
Hist1h3i	3.32e-120	-0.350891	0.055	0.272	3.88e-116	0	Hist1h3i
Dck	5.23e-120	-0.274354	0.076	0.309	6.11e-116	0	Dck
Incenp	1.24e-119	-0.428529	0.129	0.369	1.45e-115	0	Incenp
Tubg1	1.52e-119	-0.291705	0.123	0.375	1.77e-115	0	Tubg1
Hist1h2bp	2.77e-119	-0.274845	0.032	0.234	3.24e-115	0	Hist1h2bp
Psip1	4.79e-119	-0.444413	0.482	0.71	5.6e-115	0	Psip1
Hint1	6.4e-119	-0.345694	0.977	0.957	7.49e-115	0	Hint1
Lsm5	8e-119	-0.434505	0.705	0.827	9.36e-115	0	Lsm5
Hist1h2bl	1.77e-118	-0.304244	0.023	0.218	2.07e-114	0	Hist1h2bl
Srsf3	2.25e-118	-0.405252	0.931	0.93	2.63e-114	0	Srsf3
Phgdh	3e-118	-0.439285	0.471	0.698	3.51e-114	0	Phgdh
Entpd1	5.27e-117	0.46062	0.72	0.526	6.17e-113	0	Entpd1
Anapc5	1.6e-116	-0.394455	0.42	0.671	1.87e-112	0	Anapc5
Atad2	2.05e-116	-0.478654	0.333	0.592	2.39e-112	0	Atad2
Snrpe	3.37e-116	-0.326918	0.962	0.953	3.94e-112	0	Snrpe
Lockd	4.85e-115	-0.521312	0.192	0.436	5.67e-111	0	Lockd
Dnmt1	9.09e-114	-0.442684	0.342	0.587	1.06e-109	0	Dnmt1
Ybx1	1.35e-113	-0.37991	0.981	0.967	1.58e-109	0	Ybx1
Fcer1g	2.43e-113	0.84659	0.638	0.418	2.84e-109	0	Fcer1g
Hist1h2bb	2.42e-111	-0.268809	0.023	0.208	2.84e-107	0	Hist1h2bb
Rpa3	3.56e-111	-0.419097	0.427	0.653	4.16e-107	0	Rpa3
Itgb7	2.5e-110	-0.608923	0.046	0.24	2.92e-106	0	Itgb7
Dtymk	2.87e-110	-0.420062	0.478	0.682	3.35e-106	0	Dtymk
Uqcrh	6.41e-110	0.265444	0.99	0.984	7.5e-106	0	Uqcrh
Rgs16	6.53e-110	0.581465	0.753	0.566	7.63e-106	0	Rgs16
Snrpb	1.03e-109	-0.349141	0.876	0.916	1.2e-105	0	Snrpb
Fkbp2	1.26e-109	-0.407195	0.464	0.687	1.48e-105	0	Fkbp2
Eif3h	3.5e-109	0.281504	0.996	0.975	4.1e-105	0	Eif3h
AC163354.1	6.15e-108	0.426837	0.378	0.192	7.2e-104	0	AC163354.1
Ech1	8.68e-108	0.395452	0.905	0.803	1.02e-103	0	Ech1
Havcr2	2.68e-107	0.501584	0.651	0.449	3.14e-103	0	Havcr2
Rnaseh2c	3.05e-106	-0.417542	0.561	0.75	3.57e-102	0	Rnaseh2c
Hist1h1a	1.16e-105	-0.295263	0.045	0.238	1.36e-101	0	Hist1h1a
Sh2d2a	1.05e-104	0.444581	0.901	0.815	1.23e-100	0	Sh2d2a
Ptges3	1.48e-104	-0.409365	0.58	0.762	1.74e-100	0	Ptges3
Dbf4	1.63e-104	-0.369223	0.209	0.452	1.91e-100	0	Dbf4
Arhgap11a	2.92e-103	-0.286672	0.055	0.252	3.41e-99	0	Arhgap11a
Ppil1	2.75e-101	-0.296831	0.233	0.487	3.21e-97	0	Ppil1
Hnrnpa3	4.41e-101	-0.399736	0.922	0.938	5.16e-97	0	Hnrnpa3
Ms4a4c	1.16e-100	-0.679949	0.075	0.271	1.36e-96	0	Ms4a4c
Smc4	3.01e-100	-0.666387	0.656	0.771	3.52e-96	0	Smc4
Cdk4	2.75e-98	-0.404341	0.582	0.734	3.21e-94	0	Cdk4
Fam111a	2.88e-98	-0.342371	0.228	0.48	3.37e-94	0	Fam111a
Ube2t	3.1e-97	-0.257689	0.112	0.33	3.62e-93	0	Ube2t
Rcc2	1.8e-96	-0.306129	0.256	0.504	2.11e-92	0	Rcc2
Mrpl18	2.21e-96	-0.360173	0.714	0.816	2.59e-92	0	Mrpl18
Hist1h3f	6.34e-96	-0.397726	0.108	0.311	7.42e-92	0	Hist1h3f
Fcrl6	7.83e-96	0.533672	0.372	0.198	9.15e-92	0	Fcrl6
Smc3	3.44e-95	-0.393247	0.473	0.68	4.02e-91	0	Smc3
Nop56	4.6e-95	-0.400148	0.474	0.686	5.39e-91	0	Nop56
Serbp1	6.69e-95	-0.28703	0.986	0.975	7.82e-91	0	Serbp1
Laptm5	7.14e-95	0.278914	0.993	0.979	8.35e-91	0	Laptm5
Mcm2	2.33e-94	-0.284783	0.189	0.428	2.72e-90	0	Mcm2
Hist1h3a	2.59e-94	-0.28603	0.13	0.352	3.03e-90	0	Hist1h3a
Hnrnpu	5.93e-94	-0.397756	0.861	0.911	6.94e-90	0	Hnrnpu
Eif4a1	1.78e-93	-0.362002	0.935	0.939	2.09e-89	0	Eif4a1
Hist1h2be	2.33e-93	-0.396753	0.156	0.373	2.73e-89	0	Hist1h2be
Aldoa	3.28e-92	0.399606	0.982	0.951	3.84e-88	0	Aldoa
Reep4	1.19e-91	-0.275278	0.102	0.308	1.39e-87	0	Reep4
Slbp	2.85e-91	-0.411859	0.577	0.737	3.33e-87	0	Slbp
Rfc1	4.47e-91	-0.344802	0.317	0.556	5.23e-87	0	Rfc1
Slamf6	1.16e-90	-0.44151	0.023	0.178	1.36e-86	0	Slamf6
Nudc	1.33e-90	-0.354063	0.626	0.77	1.56e-86	0	Nudc
Slc29a1	5.13e-90	-0.255042	0.168	0.401	6e-86	0	Slc29a1
Tcf7	5.85e-90	-0.446494	0.022	0.175	6.84e-86	0	Tcf7
Adam8	7.54e-90	0.374129	0.405	0.236	8.82e-86	0	Adam8
Hnrnpa2b1	8.27e-90	-0.294467	0.982	0.98	9.68e-86	0	Hnrnpa2b1
Cd244	1.21e-89	0.392223	0.491	0.321	1.42e-85	0	Cd244
Tfdp1	1.33e-89	-0.291182	0.266	0.506	1.55e-85	0	Tfdp1
Emp3	3.24e-89	-0.627031	0.49	0.691	3.79e-85	0	Emp3
Cox7a2l	2.09e-88	0.279001	0.973	0.945	2.45e-84	0	Cox7a2l
AA467197	2.19e-88	0.455136	0.507	0.34	2.56e-84	0	AA467197
Ndufa4	2.46e-88	-0.321352	0.936	0.95	2.87e-84	0	Ndufa4
Plk4	2.1e-87	-0.271627	0.153	0.372	2.45e-83	0	Plk4
Nop58	2.14e-87	-0.419187	0.541	0.72	2.51e-83	0	Nop58
Hnrnpd	1.23e-86	-0.378366	0.751	0.845	1.43e-82	0	Hnrnpd
Ifng	2.6e-86	0.374133	0.873	0.722	3.04e-82	0	Ifng
Lyar	6.65e-86	-0.378441	0.456	0.656	7.78e-82	0	Lyar
Cycs	2.22e-85	-0.399624	0.837	0.883	2.6e-81	0	Cycs
Rfc2	3.8e-85	-0.37254	0.521	0.693	4.44e-81	0	Rfc2
Tuba4a	5.65e-85	-0.340193	0.346	0.578	6.61e-81	0	Tuba4a
Smchd1	6.56e-85	-0.447345	0.614	0.786	7.67e-81	0	Smchd1
Pold4	6.76e-85	0.377249	0.703	0.598	7.91e-81	0	Pold4
Syce2	6.94e-84	-0.255557	0.142	0.349	8.12e-80	0	Syce2
Nxt1	1.17e-83	-0.275712	0.263	0.501	1.37e-79	0	Nxt1
Eef2	1.42e-83	0.268997	0.995	0.983	1.67e-79	0	Eef2
Pbdc1	1.51e-83	-0.317156	0.407	0.627	1.77e-79	0	Pbdc1
Kpna2	1.53e-83	-0.269857	0.076	0.256	1.79e-79	0	Kpna2
Topbp1	4.62e-83	-0.314486	0.334	0.563	5.4e-79	0	Topbp1
Hist2h2bb	1.21e-82	-0.34601	0.132	0.326	1.41e-78	0	Hist2h2bb
Abcb9	1.61e-82	0.403007	0.689	0.549	1.88e-78	0	Abcb9
Tespa1	3.99e-82	-0.367108	0.08	0.256	4.66e-78	0	Tespa1
Anapc15	6.9e-82	-0.264626	0.241	0.473	8.08e-78	0	Anapc15
Dnaja1	1.75e-81	-0.350583	0.816	0.916	2.04e-77	0	Dnaja1
Rhoc	2.61e-81	0.313044	0.326	0.172	3.06e-77	0	Rhoc
Ppih	2.81e-81	-0.259825	0.256	0.49	3.29e-77	0	Ppih
Ssrp1	4.96e-81	-0.342343	0.547	0.726	5.8e-77	0	Ssrp1
Rbmxl1	6.78e-81	-0.301706	0.365	0.59	7.93e-77	0	Rbmxl1
Cxcr3	8.27e-81	-0.552107	0.07	0.236	9.67e-77	0	Cxcr3
Bzw2	1.39e-80	-0.326154	0.281	0.508	1.63e-76	0	Bzw2
Rap1a	2.31e-80	0.324321	0.954	0.888	2.7e-76	0	Rap1a
Gramd3	4.87e-80	-0.465908	0.119	0.301	5.7e-76	0	Gramd3
Mthfd2	1.67e-79	-0.370405	0.344	0.56	1.95e-75	0	Mthfd2
Vasp	4.28e-79	0.30826	0.939	0.896	5.01e-75	0	Vasp
Psat1	9.69e-79	-0.264802	0.235	0.455	1.13e-74	0	Psat1
Hist2h2ac	1.67e-78	-0.462963	0.222	0.418	1.95e-74	0	Hist2h2ac
Dapk2	1.7e-78	0.342208	0.488	0.339	1.99e-74	0	Dapk2
Ilf2	1.02e-77	-0.273846	0.351	0.582	1.2e-73	0	Ilf2
Rad21	1.99e-76	-0.421789	0.372	0.569	2.33e-72	0	Rad21
Hist1h4h	2.03e-76	-0.284917	0.088	0.261	2.37e-72	0	Hist1h4h
Ccr7	2.26e-76	-0.359668	0.016	0.148	2.64e-72	0	Ccr7
Nsmce4a	2.54e-76	-0.318058	0.496	0.687	2.97e-72	0	Nsmce4a
U2af1	2.71e-76	-0.323408	0.695	0.809	3.17e-72	0	U2af1
Rgs3	3.01e-76	0.37802	0.611	0.485	3.52e-72	0	Rgs3
Lsm4	3.67e-76	-0.321238	0.72	0.826	4.3e-72	0	Lsm4
Hpf1	8.19e-76	-0.338254	0.609	0.745	9.58e-72	0	Hpf1
Eri1	1.44e-75	-0.295471	0.316	0.54	1.69e-71	0	Eri1
Ly6e	3.14e-75	-0.557393	0.851	0.872	3.67e-71	0	Ly6e
Gpi1	8.03e-75	0.320199	0.951	0.917	9.39e-71	0	Gpi1
Npm1	2.07e-74	-0.309474	0.99	0.983	2.42e-70	0	Npm1
Cbx1	5.28e-74	-0.31804	0.587	0.743	6.18e-70	0	Cbx1
Csrp1	7.63e-74	-0.290928	0.32	0.539	8.93e-70	0	Csrp1
Dusp2	1.1e-73	0.490067	0.839	0.759	1.28e-69	0	Dusp2
Ccl5	2.83e-73	0.325932	0.848	0.733	3.31e-69	0	Ccl5
Lbr	4.31e-73	-0.336165	0.449	0.656	5.04e-69	0	Lbr
Magoh	4.79e-73	-0.307995	0.704	0.816	5.6e-69	0	Magoh
Pdcd1	8.35e-73	0.34467	0.912	0.748	9.76e-69	0	Pdcd1
Rad50	3.06e-72	-0.285652	0.249	0.462	3.58e-68	0	Rad50
Arpp19	3.92e-72	-0.298276	0.826	0.894	4.59e-68	0	Arpp19
Hmgn5	4.1e-72	-0.310972	0.302	0.516	4.79e-68	0	Hmgn5
Eif3e	5.92e-72	0.269192	0.962	0.939	6.92e-68	0	Eif3e
Slco3a1	1.67e-71	-0.358694	0.031	0.164	1.96e-67	0	Slco3a1
Vps37b	3.23e-71	0.356029	0.825	0.745	3.77e-67	0	Vps37b
Ssh2	9.44e-71	-0.373209	0.113	0.284	1.1e-66	0	Ssh2
Xcl1	1.85e-70	-1.04302	0.11	0.275	2.17e-66	0	Xcl1
Litaf	3.15e-70	0.345092	0.58	0.458	3.69e-66	0	Litaf
Zyx	1.43e-69	0.32785	0.841	0.769	1.67e-65	0	Zyx
Kif15	3.14e-69	-0.387694	0.267	0.457	3.67e-65	0	Kif15
Ndufa5	3.78e-69	-0.308291	0.601	0.752	4.42e-65	0	Ndufa5
Rbbp4	4.39e-69	-0.322474	0.638	0.773	5.14e-65	0	Rbbp4
Hspa14	6.21e-69	-0.281637	0.431	0.635	7.27e-65	0	Hspa14
Nr4a2	6.38e-69	0.460315	0.725	0.584	7.46e-65	0	Nr4a2
Tuba1c	6.78e-69	-0.5716	0.376	0.55	7.93e-65	0	Tuba1c
Snu13	7.11e-69	-0.331826	0.815	0.86	8.31e-65	0	Snu13
Gm20186	8.51e-69	-0.466539	0.088	0.244	9.96e-65	0	Gm20186
Hspd1	4.42e-68	-0.390347	0.714	0.808	5.17e-64	0	Hspd1
Gzmb	1.49e-67	0.444033	0.93	0.815	1.74e-63	0	Gzmb
Hnrnpdl	2.79e-67	-0.308456	0.626	0.773	3.26e-63	0	Hnrnpdl
Filip1	3.13e-67	0.392186	0.378	0.232	3.66e-63	0	Filip1
Chsy1	3.36e-67	0.357511	0.614	0.5	3.93e-63	0	Chsy1
Cd37	4.75e-67	0.292348	0.86	0.815	5.56e-63	0	Cd37
Prdx5	2.77e-66	0.293109	0.869	0.832	3.24e-62	0	Prdx5
Il7r	1.38e-65	-0.636327	0.158	0.327	1.61e-61	0	Il7r
Samsn1	2.75e-65	0.34787	0.862	0.741	3.22e-61	0	Samsn1
Sae1	3.14e-65	-0.274453	0.46	0.648	3.68e-61	0	Sae1
Fkbp4	6.56e-65	-0.291209	0.438	0.631	7.68e-61	0	Fkbp4
Eid1	1.1e-64	0.339386	0.704	0.614	1.29e-60	0	Eid1
Ubald2	1.13e-64	-0.376131	0.37	0.558	1.32e-60	0	Ubald2
Srgap3	1.24e-64	0.353478	0.51	0.383	1.46e-60	0	Srgap3
Jpt1	2.31e-64	-0.370179	0.882	0.911	2.71e-60	0	Jpt1
Klrc1	2.48e-64	0.287933	0.959	0.801	2.9e-60	0	Klrc1
Dkc1	2.68e-64	-0.291791	0.366	0.563	3.14e-60	0	Dkc1
G3bp1	2.69e-64	-0.306296	0.722	0.813	3.15e-60	0	G3bp1
Ccl4	6.23e-64	0.374783	0.796	0.651	7.28e-60	0	Ccl4
Itga4	8.39e-64	0.335015	0.82	0.727	9.81e-60	0	Itga4
Cenpx	9.4e-64	-0.287796	0.616	0.753	1.1e-59	0	Cenpx
Nolc1	1.25e-63	-0.30002	0.316	0.511	1.46e-59	0	Nolc1
Prr13	1.49e-63	0.280785	0.841	0.791	1.74e-59	0	Prr13
Uchl5	1.88e-63	-0.271274	0.37	0.571	2.2e-59	0	Uchl5
Pdap1	2.72e-63	-0.289443	0.7	0.808	3.18e-59	0	Pdap1
Tcrg-C2	5.97e-63	0.480044	0.453	0.286	6.98e-59	0	Tcrg-C2
Csf1	8.77e-63	0.378308	0.439	0.303	1.03e-58	0	Csf1
Tcp1	2e-62	-0.286004	0.632	0.765	2.34e-58	0	Tcp1
Zbtb32	2e-62	0.360413	0.608	0.486	2.34e-58	0	Zbtb32
Gabarap	3.38e-62	0.267233	0.938	0.904	3.96e-58	0	Gabarap
Spp1	9.26e-62	0.701903	0.779	0.616	1.08e-57	0	Spp1
Baz1b	1.36e-61	-0.295535	0.391	0.585	1.59e-57	0	Baz1b
Hspa1b	1.4e-61	-0.450694	0.202	0.393	1.64e-57	0	Hspa1b
Gm42047	1.79e-61	-0.344563	0.202	0.383	2.09e-57	0	Gm42047
Ddx39b	1.86e-61	-0.278757	0.717	0.825	2.18e-57	0	Ddx39b
Sdf2l1	2.19e-61	-0.304506	0.463	0.637	2.56e-57	0	Sdf2l1
Bhlhe40	3.94e-61	0.382932	0.715	0.594	4.61e-57	0	Bhlhe40
Tm6sf1	5.61e-61	0.341178	0.674	0.573	6.57e-57	0	Tm6sf1
Cdkn2d	1.4e-60	-0.410374	0.253	0.42	1.64e-56	0	Cdkn2d
Kmt5a	4.77e-60	-0.268502	0.379	0.578	5.58e-56	0	Kmt5a
Tmem163	6.21e-60	0.311917	0.501	0.385	7.26e-56	0	Tmem163
Timm8a1	6.25e-60	-0.262688	0.303	0.494	7.31e-56	0	Timm8a1
Suz12	5.18e-59	-0.294021	0.464	0.642	6.06e-55	0	Suz12
Gem	6.39e-59	0.397113	0.59	0.473	7.48e-55	0	Gem
Naa50	6.85e-59	-0.252061	0.376	0.58	8.01e-55	0	Naa50
Lsm6	3.78e-58	-0.262942	0.691	0.792	4.42e-54	0	Lsm6
Rif1	6.69e-58	-0.278723	0.378	0.57	7.83e-54	0	Rif1
Gng2	7.86e-58	0.278707	0.895	0.834	9.19e-54	0	Gng2
Sdcbp2	8.49e-58	0.309506	0.421	0.288	9.93e-54	0	Sdcbp2
Gm2682	1.69e-57	-0.315218	0.049	0.172	1.97e-53	0	Gm2682
Pld3	1.9e-57	0.291801	0.676	0.589	2.22e-53	0	Pld3
2900026A02Rik	5.53e-57	0.348024	0.404	0.28	6.47e-53	0	2900026A02Rik
Hist1h1d	1.08e-56	-0.495173	0.351	0.514	1.26e-52	0	Hist1h1d
Smc6	3.79e-56	-0.317437	0.743	0.833	4.44e-52	0	Smc6
Jund	5.47e-56	0.252581	0.993	0.986	6.4e-52	0	Jund
Xist	6.16e-56	-0.335781	0.983	0.974	7.21e-52	0	Xist
Slc37a2	6.78e-56	0.281387	0.279	0.158	7.94e-52	0	Slc37a2
Erh	7.43e-56	-0.29443	0.572	0.72	8.69e-52	0	Erh
Mrpl23	8e-56	-0.277861	0.604	0.751	9.35e-52	0	Mrpl23
H2afj	1.43e-55	-0.283979	0.809	0.893	1.67e-51	0	H2afj
Ak2	1.5e-55	-0.26765	0.419	0.611	1.76e-51	0	Ak2
Phf5a	4.36e-55	-0.259195	0.584	0.73	5.1e-51	0	Phf5a
Lgals1	2.63e-54	0.276768	0.999	0.96	3.08e-50	0	Lgals1
Dapl1	3.21e-54	-0.749278	0.027	0.132	3.75e-50	0	Dapl1
S1pr1	4.93e-54	-0.269123	0.009	0.101	5.77e-50	0	S1pr1
Tnfrsf18	8.11e-54	0.295059	0.854	0.8	9.49e-50	0	Tnfrsf18
Bcl2a1b	3.04e-53	0.279788	0.88	0.786	3.56e-49	0	Bcl2a1b
Mrpl42	5.24e-53	-0.26566	0.621	0.747	6.12e-49	0	Mrpl42
Lef1	5.68e-53	-0.328562	0.048	0.165	6.65e-49	0	Lef1
Sell	1.12e-52	-0.370708	0.028	0.134	1.31e-48	0	Sell
Nedd9	1.73e-52	0.321959	0.638	0.546	2.02e-48	0	Nedd9
Cblb	2.44e-52	0.317614	0.801	0.73	2.85e-48	0	Cblb
Arl4c	3.6e-52	-0.601532	0.356	0.511	4.21e-48	0	Arl4c
Atp1b3	6.11e-52	-0.29602	0.628	0.779	7.15e-48	0	Atp1b3
Hnrnpr	6.92e-52	-0.256176	0.543	0.708	8.1e-48	0	Hnrnpr
Supt16	2.67e-51	-0.290963	0.55	0.694	3.12e-47	0	Supt16
Rgs1	5.48e-51	0.433622	0.85	0.778	6.41e-47	0	Rgs1
Snrpa1	1.35e-50	-0.280326	0.599	0.723	1.58e-46	0	Snrpa1
Rdx	2.12e-50	-0.257538	0.55	0.711	2.47e-46	0	Rdx
Nmb	3.75e-50	0.263042	0.375	0.256	4.39e-46	0	Nmb
Lsm8	4.57e-50	-0.262137	0.546	0.694	5.34e-46	0	Lsm8
Unc119	6.99e-50	0.277255	0.693	0.603	8.18e-46	0	Unc119
Ckap5	1.15e-49	-0.252718	0.195	0.353	1.35e-45	0	Ckap5
Klrc2	1.48e-49	0.263543	0.897	0.767	1.73e-45	0	Klrc2
Wnk1	1.48e-48	0.295692	0.899	0.87	1.73e-44	0	Wnk1
Rexo2	1.64e-48	-0.332029	0.662	0.771	1.91e-44	0	Rexo2
Snrpd3	1.93e-48	-0.262321	0.678	0.79	2.25e-44	0	Snrpd3
Plek	2.08e-48	0.288997	0.71	0.593	2.44e-44	0	Plek
Dnajc2	5.41e-48	-0.258314	0.613	0.75	6.33e-44	0	Dnajc2
Dusp5	3.44e-47	0.345435	0.554	0.454	4.03e-43	0	Dusp5
Pmepa1	3.97e-47	-0.357679	0.036	0.136	4.64e-43	0	Pmepa1
Nsd2	4.37e-47	-0.281463	0.401	0.567	5.11e-43	0	Nsd2
Bub3	4.6e-47	-0.325137	0.568	0.69	5.38e-43	0	Bub3
Ppa1	7.33e-47	-0.299813	0.516	0.656	8.57e-43	0	Ppa1
Nfil3	8.91e-47	0.319207	0.484	0.379	1.04e-42	0	Nfil3
Napsa	8.97e-47	0.318714	0.362	0.245	1.05e-42	0	Napsa
Kbtbd11	3.03e-46	-0.318612	0.064	0.174	3.55e-42	0	Kbtbd11
Pkp3	1.01e-45	0.338825	0.615	0.521	1.18e-41	0	Pkp3
Ppp1r3b	1.07e-45	0.264418	0.29	0.181	1.26e-41	0	Ppp1r3b
Hspa1a	1.6e-45	-0.427646	0.148	0.293	1.87e-41	0	Hspa1a
Ncf4	1.93e-45	0.269052	0.811	0.756	2.26e-41	0	Ncf4
Itih5	1.56e-44	0.301401	0.411	0.305	1.82e-40	0	Itih5
Chn2	3.85e-44	0.295078	0.434	0.336	4.51e-40	0	Chn2
Trgv2	8.76e-44	0.344349	0.348	0.224	1.03e-39	0	Trgv2
Gpr183	2.06e-43	-0.366627	0.28	0.44	2.41e-39	0	Gpr183
Gpd2	2.12e-43	0.286127	0.595	0.498	2.48e-39	0	Gpd2
Ypel3	2.61e-43	0.259278	0.536	0.429	3.05e-39	0	Ypel3
Igtp	8.93e-43	-0.384271	0.333	0.499	1.04e-38	0	Igtp
Klf2	3.27e-42	-0.976696	0.354	0.501	3.83e-38	0	Klf2
Atxn1	3.52e-42	0.273844	0.63	0.548	4.12e-38	0	Atxn1
Sytl2	1.01e-41	0.263559	0.431	0.326	1.18e-37	0	Sytl2
Taf1d	2.19e-41	-0.251102	0.6	0.747	2.56e-37	0	Taf1d
Ctsb	3.17e-41	0.252563	0.788	0.725	3.71e-37	0	Ctsb
C1qtnf6	4.04e-41	0.343535	0.374	0.273	4.72e-37	0	C1qtnf6
Ubash3b	5.6e-41	0.287213	0.621	0.534	6.55e-37	0	Ubash3b
Anp32a	1.47e-40	-0.251519	0.78	0.867	1.72e-36	0	Anp32a
Prex1	7.02e-40	0.262054	0.542	0.453	8.21e-36	0	Prex1
Gm156	8.49e-40	0.610676	0.409	0.298	9.93e-36	0	Gm156
Dbi	8.51e-40	-0.254564	0.744	0.809	9.96e-36	0	Dbi
Ehd1	9.43e-40	0.273212	0.503	0.416	1.1e-35	0	Ehd1
Dnajc15	9.48e-40	-0.270474	0.445	0.614	1.11e-35	0	Dnajc15
Vsir	2.05e-39	0.255637	0.548	0.465	2.4e-35	0	Vsir
Myo10	8.04e-39	0.307563	0.303	0.203	9.41e-35	0	Myo10
Cers4	1.2e-38	0.256157	0.54	0.459	1.4e-34	0	Cers4
Fbl	2.82e-38	-0.260678	0.61	0.714	3.3e-34	0	Fbl
a	9.35e-38	0.287711	0.322	0.224	1.09e-33	0	a
Cmip	1.66e-37	0.267044	0.539	0.463	1.94e-33	0	Cmip
Osbpl3	1.29e-36	0.277564	0.501	0.42	1.51e-32	0	Osbpl3
Serpinb6a	2.24e-36	0.270708	0.753	0.689	2.62e-32	0	Serpinb6a
Itgb1	2.75e-36	-0.421956	0.648	0.765	3.22e-32	0	Itgb1
Ikzf3	7.75e-36	0.266227	0.563	0.483	9.06e-32	0	Ikzf3
Foxp1	9.11e-36	-0.319978	0.319	0.461	1.07e-31	0	Foxp1
Xrn2	1.03e-35	-0.253814	0.723	0.826	1.21e-31	0	Xrn2
Cdc14a	1.33e-35	0.270911	0.464	0.38	1.56e-31	0	Cdc14a
Bcl2l11	1.59e-35	0.328262	0.449	0.359	1.86e-31	0	Bcl2l11
Ptpn6	2.59e-35	0.266849	0.825	0.768	3.03e-31	0	Ptpn6
Nrn1	3.07e-34	0.413947	0.462	0.351	3.59e-30	0	Nrn1
Ccr5	5.22e-34	0.254885	0.55	0.456	6.11e-30	0	Ccr5
Mdfic	1.77e-33	0.260727	0.599	0.539	2.07e-29	0	Mdfic
C1qbp	2.16e-33	-0.256382	0.63	0.715	2.53e-29	0	C1qbp
Nabp1	2.54e-33	0.302974	0.746	0.711	2.97e-29	0	Nabp1
Hilpda	5.64e-33	0.341331	0.412	0.328	6.6e-29	0	Hilpda
Cd55	2.65e-32	0.33649	0.381	0.289	3.1e-28	0	Cd55
Cdk2ap2	1.31e-31	-0.268631	0.678	0.787	1.54e-27	0	Cdk2ap2
Dusp4	4.61e-31	0.259137	0.505	0.429	5.39e-27	0	Dusp4
Rgs10	1.43e-30	-0.254984	0.123	0.226	1.67e-26	0	Rgs10
Chd3	1.99e-30	-0.285682	0.317	0.456	2.33e-26	0	Chd3
Ifi47	6.56e-30	-0.334459	0.589	0.723	7.68e-26	0	Ifi47
Ccnd2	8.01e-30	-0.412202	0.561	0.681	9.36e-26	0	Ccnd2
Serpinb9b	2.62e-28	0.506955	0.253	0.163	3.07e-24	0	Serpinb9b
Isg15	8.35e-28	-0.733604	0.341	0.46	9.76e-24	0	Isg15
Gbp2	1.27e-27	-0.304276	0.159	0.263	1.48e-23	0	Gbp2
Gm26917	6.72e-27	-0.275974	0.676	0.78	7.86e-23	0	Gm26917
Ier5l	8.48e-27	0.25599	0.311	0.224	9.92e-23	0	Ier5l
Cenpa	1.53e-26	-0.602872	0.613	0.64	1.79e-22	0	Cenpa
Ccl3	2.02e-26	0.270796	0.582	0.476	2.36e-22	0	Ccl3
Rtp4	4.24e-26	-0.298819	0.242	0.356	4.96e-22	0	Rtp4
Fos	1.1e-25	-0.552531	0.345	0.466	1.29e-21	0	Fos
Gbp2b	4.48e-25	-0.306675	0.134	0.226	5.24e-21	0	Gbp2b
Ifit3	4.54e-25	-0.444641	0.081	0.159	5.31e-21	0	Ifit3
Slfn2	8.49e-25	-0.397852	0.688	0.792	9.93e-21	0	Slfn2
Slfn1	1.15e-24	-0.433981	0.35	0.461	1.35e-20	0	Slfn1
Phlda1	5.45e-24	0.263895	0.444	0.372	6.37e-20	0	Phlda1
Slfn5	2.97e-22	-0.402737	0.05	0.112	3.48e-18	0	Slfn5
Gzmf	6.31e-21	1.04195	0.177	0.111	7.38e-17	0	Gzmf
Zfp36l1	9.41e-21	-0.27444	0.489	0.613	1.1e-16	0	Zfp36l1
Uhrf2	1.53e-19	0.291492	0.678	0.645	1.79e-15	0	Uhrf2
Igfbp7	1.04e-18	-0.276059	0.119	0.193	1.21e-14	0	Igfbp7
Zbp1	1.16e-18	-0.295779	0.559	0.676	1.36e-14	0	Zbp1
Serpinb6b	2.78e-17	0.267944	0.529	0.469	3.25e-13	0	Serpinb6b
Slc16a11	2.89e-16	0.279788	0.428	0.366	3.38e-12	0	Slc16a11
Cd69	1.11e-15	-0.307236	0.618	0.722	1.3e-11	0	Cd69
Bcl11b	3.09e-15	-0.277972	0.454	0.559	3.62e-11	0	Bcl11b
Plac8	3.69e-14	0.342509	0.584	0.535	4.31e-10	0	Plac8
Gm12840	8.08e-14	-0.349234	0.21	0.284	9.45e-10	0	Gm12840
Bst2	1.1e-13	-0.295364	0.657	0.754	1.28e-09	0	Bst2
Zfp36l2	1.46e-13	-0.334525	0.664	0.77	1.71e-09	0	Zfp36l2
Ifitm2	1.76e-12	0.388024	0.387	0.327	2.06e-08	0	Ifitm2
Ifit1	5.21e-12	-0.329768	0.098	0.149	6.1e-08	0	Ifit1
Ly6a	2.82e-11	-0.405768	0.334	0.402	3.3e-07	0	Ly6a
Ly6c2	1.27e-10	-0.561227	0.477	0.537	1.49e-06	0	Ly6c2
Txnip	1.33e-10	-0.311698	0.413	0.484	1.55e-06	0	Txnip
Ifitm1	1.89e-10	0.579422	0.203	0.154	2.22e-06	0	Ifitm1
Irf7	8.26e-10	-0.278309	0.352	0.424	9.66e-06	0	Irf7
Ifngr1	9.25e-10	-0.379881	0.706	0.761	1.08e-05	0	Ifngr1
Tsc22d3	1.21e-08	-0.255619	0.329	0.397	0.000141958	0	Tsc22d3
Samhd1	9.36e-07	-0.300517	0.534	0.614	0.0109455	0	Samhd1
Ly6c1	1.42e-05	-0.275734	0.283	0.323	0.165708	0	Ly6c1
Hist1h1e	3.88e-05	-0.373114	0.841	0.802	0.453717	0	Hist1h1e
Gzmc	4.12e-05	0.564457	0.115	0.091	0.481842	0	Gzmc
Mcm3.1	0	0.854343	0.892	0.392	0	2	Mcm3
Ranbp1.1	0	0.833681	0.995	0.8	0	2	Ranbp1
Mcm6.1	0	0.830252	0.883	0.388	0	2	Mcm6
Nme1	0	0.745818	0.996	0.862	0	2	Nme1
Mcm5.1	0	0.724123	0.873	0.404	0	2	Mcm5
Mcm4.1	0	0.666609	0.829	0.39	0	2	Mcm4
Cdca7.1	0	0.594461	0.676	0.185	0	2	Cdca7
Mcm2.1	0	0.541901	0.721	0.268	0	2	Mcm2
Ung.1	0	0.541723	0.558	0.086	0	2	Ung
Set.1	1.38e-301	0.643184	0.998	0.924	1.61e-297	2	Set
Srm	1.98e-296	0.573642	0.673	0.24	2.32e-292	2	Srm
Tipin.1	1.04e-295	0.674174	0.897	0.467	1.22e-291	2	Tipin
Ncl.1	2.03e-294	0.725616	0.999	0.939	2.37e-290	2	Ncl
Mcm7.1	3.54e-293	0.655745	0.829	0.377	4.14e-289	2	Mcm7
Apex1	5.17e-290	0.479838	0.682	0.241	6.05e-286	2	Apex1
Dut.1	2.3e-287	0.80277	0.976	0.745	2.69e-283	2	Dut
Hells.1	6.92e-282	0.667667	0.863	0.426	8.1e-278	2	Hells
Eif5a.1	2.83e-268	0.629344	0.999	0.952	3.31e-264	2	Eif5a
Lig1.1	2.77e-264	0.655355	0.844	0.396	3.24e-260	2	Lig1
C1qbp.1	2.72e-258	0.645539	0.938	0.628	3.18e-254	2	C1qbp
Fabp5.1	1.63e-257	0.689339	0.851	0.447	1.91e-253	2	Fabp5
H2-D1	3.99e-255	-0.486198	1	1	4.66e-251	2	H2-D1
Npm1.1	1.46e-253	0.532362	1	0.982	1.71e-249	2	Npm1
Serbp1.1	8.71e-253	0.47994	1	0.973	1.02e-248	2	Serbp1
Ppp1r14b	3.34e-250	0.655678	0.957	0.676	3.9e-246	2	Ppp1r14b
H2-K1	3.69e-238	-0.548436	1	0.999	4.32e-234	2	H2-K1
Nop58.1	6.13e-236	0.641334	0.921	0.605	7.17e-232	2	Nop58
Pa2g4.1	5.18e-231	0.605899	0.925	0.622	6.06e-227	2	Pa2g4
Nhp2	1.34e-229	0.588704	0.953	0.663	1.57e-225	2	Nhp2
Ybx1.1	1.62e-228	0.500082	0.999	0.964	1.89e-224	2	Ybx1
Ptma.1	3.23e-227	0.531852	1	0.996	3.78e-223	2	Ptma
Hspd1.1	8.33e-226	0.634691	0.965	0.734	9.75e-222	2	Hspd1
Cisd1	5.81e-222	0.557708	0.872	0.525	6.79e-218	2	Cisd1
Timm8a1.1	1.27e-220	0.50051	0.75	0.361	1.49e-216	2	Timm8a1
Ppa1.1	1.89e-217	0.551434	0.894	0.546	2.21e-213	2	Ppa1
Eno3	9.63e-217	0.789731	0.811	0.457	1.13e-212	2	Eno3
Nolc1.1	3.23e-216	0.529892	0.761	0.378	3.78e-212	2	Nolc1
Gins2.1	1.25e-210	0.416591	0.589	0.232	1.47e-206	2	Gins2
Dkc1.1	2.92e-210	0.522773	0.807	0.431	3.42e-206	2	Dkc1
Siva1.1	3.45e-209	0.555537	0.877	0.529	4.04e-205	2	Siva1
Nop56.1	9.81e-209	0.552704	0.895	0.557	1.15e-204	2	Nop56
Dhfr.1	3.7e-207	0.462225	0.606	0.241	4.33e-203	2	Dhfr
Shmt1	1.63e-205	0.279792	0.371	0.093	1.91e-201	2	Shmt1
Cdk4.1	2.58e-203	0.53994	0.92	0.633	3.02e-199	2	Cdk4
Ppia.1	3e-201	0.388368	1	0.997	3.51e-197	2	Ppia
Ran.1	5.81e-201	0.552594	0.996	0.913	6.8e-197	2	Ran
Eif4a1.1	4.33e-200	0.503853	0.996	0.923	5.06e-196	2	Eif4a1
Slc25a5.1	1.83e-198	0.502399	0.994	0.925	2.14e-194	2	Slc25a5
Fbl.1	2.54e-197	0.519627	0.921	0.625	2.97e-193	2	Fbl
Hnrnpab.1	2.57e-197	0.552944	0.976	0.769	3.01e-193	2	Hnrnpab
Hsp90ab1	4.16e-194	0.406311	1	0.992	4.86e-190	2	Hsp90ab1
Srsf7.1	1.05e-191	0.569285	0.941	0.658	1.23e-187	2	Srsf7
Atp5g1	1.43e-191	0.493748	0.982	0.839	1.67e-187	2	Atp5g1
Nasp.1	1.07e-190	0.529756	0.898	0.567	1.25e-186	2	Nasp
Snrpd1.1	1.74e-190	0.518978	0.977	0.783	2.03e-186	2	Snrpd1
Mrto4	1.1e-189	0.464686	0.789	0.431	1.28e-185	2	Mrto4
Syce2.1	7.94e-189	0.399431	0.558	0.222	9.29e-185	2	Syce2
Ppat	2.77e-188	0.407326	0.661	0.3	3.24e-184	2	Ppat
Mettl1	2.45e-187	0.35369	0.529	0.194	2.87e-183	2	Mettl1
Rps2	2.78e-187	0.381357	1	0.994	3.25e-183	2	Rps2
Ldha	2.68e-186	0.52903	0.998	0.944	3.14e-182	2	Ldha
Prim1.1	4.01e-186	0.418033	0.712	0.328	4.69e-182	2	Prim1
Orc6.1	4.1e-183	0.430307	0.711	0.337	4.8e-179	2	Orc6
Dctpp1.1	4.06e-181	0.484289	0.824	0.454	4.75e-177	2	Dctpp1
E2f1	2.37e-180	0.302852	0.402	0.122	2.77e-176	2	E2f1
Zmynd19	2.52e-179	0.286698	0.441	0.145	2.94e-175	2	Zmynd19
Pcna.1	8.07e-178	0.497064	0.906	0.582	9.44e-174	2	Pcna
Chaf1b	1.06e-177	0.344569	0.562	0.228	1.24e-173	2	Chaf1b
Atic	7.74e-177	0.42846	0.674	0.323	9.06e-173	2	Atic
Tfdp1.1	5.07e-176	0.41797	0.723	0.365	5.93e-172	2	Tfdp1
Snu13.1	3.86e-174	0.49913	0.971	0.816	4.52e-170	2	Snu13
Gnl3	2.54e-167	0.458101	0.764	0.421	2.97e-163	2	Gnl3
Mif	1.37e-165	0.493601	0.998	0.932	1.6e-161	2	Mif
Hspe1	9.19e-165	0.442799	0.995	0.922	1.08e-160	2	Hspe1
Ndufab1	2.7e-164	0.471194	0.958	0.755	3.16e-160	2	Ndufab1
Eif2s1	5.1e-161	0.459382	0.938	0.711	5.96e-157	2	Eif2s1
Cycs.1	1.64e-160	0.476502	0.985	0.841	1.92e-156	2	Cycs
Rsl1d1	5.25e-160	0.476101	0.927	0.696	6.14e-156	2	Rsl1d1
Gart	5.99e-159	0.32046	0.564	0.239	7e-155	2	Gart
Mthfd1	6.22e-159	0.285641	0.439	0.157	7.28e-155	2	Mthfd1
Rrp15	1.93e-158	0.335385	0.606	0.267	2.26e-154	2	Rrp15
Rps17	3.03e-157	0.372187	0.999	0.987	3.55e-153	2	Rps17
Nap1l1	1.04e-154	0.476647	0.989	0.872	1.22e-150	2	Nap1l1
Nsun2	6.75e-152	0.381883	0.652	0.326	7.9e-148	2	Nsun2
Srsf2.1	1.47e-150	0.449635	0.982	0.842	1.72e-146	2	Srsf2
S100a10	1.43e-147	-0.622474	0.989	0.982	1.68e-143	2	S100a10
Rbmxl1.1	3.52e-147	0.402586	0.786	0.46	4.11e-143	2	Rbmxl1
Rfc3.1	7.55e-147	0.386616	0.687	0.351	8.83e-143	2	Rfc3
Tomm40	1.02e-146	0.395387	0.763	0.437	1.19e-142	2	Tomm40
Tfrc	2.49e-146	0.374939	0.567	0.257	2.91e-142	2	Tfrc
Snrpa1.1	2.23e-145	0.448481	0.905	0.633	2.61e-141	2	Snrpa1
Phb2	3.3e-144	0.455373	0.957	0.77	3.86e-140	2	Phb2
Lyar.1	2.52e-143	0.443829	0.847	0.536	2.95e-139	2	Lyar
Rrs1	2.57e-143	0.31552	0.565	0.254	3e-139	2	Rrs1
Lsm7	4.72e-143	0.415632	0.843	0.541	5.53e-139	2	Lsm7
Btg1	5.44e-143	-0.831831	0.972	0.983	6.36e-139	2	Btg1
Gar1	5.47e-143	0.38348	0.784	0.445	6.4e-139	2	Gar1
Umps	9.41e-143	0.310712	0.54	0.236	1.1e-138	2	Umps
Cct3	3.72e-142	0.422066	0.933	0.698	4.35e-138	2	Cct3
Snrpd3.1	7.66e-142	0.420864	0.947	0.711	8.96e-138	2	Snrpd3
Dnmt1.1	1.4e-141	0.407698	0.785	0.449	1.63e-137	2	Dnmt1
Arl6ip1	5.44e-141	-0.803772	0.953	0.933	6.36e-137	2	Arl6ip1
Mrpl12	6.7e-141	0.431461	0.904	0.637	7.84e-137	2	Mrpl12
Cd3eap	6.98e-141	0.276782	0.449	0.169	8.17e-137	2	Cd3eap
Timeless	1.79e-140	0.267927	0.402	0.147	2.09e-136	2	Timeless
Rfc4.1	8.81e-140	0.389011	0.676	0.345	1.03e-135	2	Rfc4
Phgdh.1	7.85e-139	0.447545	0.875	0.572	9.19e-135	2	Phgdh
Uchl3	1.3e-138	0.412375	0.837	0.539	1.52e-134	2	Uchl3
Mybbp1a	1.78e-138	0.347459	0.631	0.31	2.08e-134	2	Mybbp1a
Cacybp	1.92e-138	0.425347	0.942	0.727	2.24e-134	2	Cacybp
Cox5a	1.09e-137	0.382735	0.994	0.945	1.28e-133	2	Cox5a
Nop16	3.72e-137	0.290977	0.522	0.228	4.36e-133	2	Nop16
Noc2l	4.99e-137	0.31617	0.601	0.286	5.84e-133	2	Noc2l
Sfxn1	8.32e-137	0.392242	0.807	0.487	9.73e-133	2	Sfxn1
Cenps.1	8.63e-137	0.304294	0.541	0.241	1.01e-132	2	Cenps
H2-T23	1.16e-136	-0.591953	0.968	0.969	1.36e-132	2	H2-T23
Ppil1.1	1.71e-136	0.336431	0.676	0.348	2.01e-132	2	Ppil1
Rfc2.1	1.79e-136	0.421566	0.884	0.584	2.09e-132	2	Rfc2
Galk1	3.35e-136	0.36626	0.688	0.366	3.92e-132	2	Galk1
G3bp1.1	6.59e-136	0.426428	0.953	0.745	7.71e-132	2	G3bp1
Prdx1	7.79e-136	0.424527	0.989	0.903	9.11e-132	2	Prdx1
Cct5	2.28e-135	0.407555	0.979	0.834	2.67e-131	2	Cct5
Rps27l	2.46e-135	0.457733	0.973	0.819	2.87e-131	2	Rps27l
Dtymk.1	6.06e-135	0.414076	0.866	0.562	7.08e-131	2	Dtymk
Lap3	3.58e-133	0.303637	0.56	0.26	4.18e-129	2	Lap3
Eef1g	1.44e-132	0.396506	0.995	0.932	1.69e-128	2	Eef1g
Ebna1bp2	4.18e-132	0.402646	0.879	0.595	4.88e-128	2	Ebna1bp2
Prmt1	4.22e-132	0.419152	0.914	0.67	4.93e-128	2	Prmt1
Gm47283.1	1.42e-131	0.489464	0.973	0.797	1.66e-127	2	Gm47283
Tkt	1.51e-131	0.424889	0.956	0.752	1.77e-127	2	Tkt
H3f3b	2.06e-131	-0.511329	1	0.998	2.41e-127	2	H3f3b
Ppid	1.2e-130	0.38883	0.749	0.441	1.4e-126	2	Ppid
Timm9	1.54e-130	0.295367	0.601	0.289	1.8e-126	2	Timm9
Phb	6.42e-130	0.368755	0.761	0.449	7.5e-126	2	Phb
Snrpf.1	4.98e-129	0.377589	0.994	0.89	5.82e-125	2	Snrpf
Fen1.1	1.01e-127	0.33645	0.64	0.326	1.18e-123	2	Fen1
Rps6	1.91e-127	0.264162	1	0.994	2.24e-123	2	Rps6
Tk1.1	8.86e-127	0.348929	0.676	0.34	1.04e-122	2	Tk1
Hspa9	1.35e-126	0.360838	0.772	0.455	1.58e-122	2	Hspa9
Malat1	4.19e-125	-0.901541	1	0.999	4.91e-121	2	Malat1
Cct8	8.51e-125	0.383452	0.959	0.784	9.95e-121	2	Cct8
Ipo5	1.96e-124	0.301971	0.561	0.27	2.3e-120	2	Ipo5
Eif3b	1.24e-122	0.373534	0.758	0.456	1.45e-118	2	Eif3b
Ddx21	6.6e-121	0.434062	0.867	0.605	7.72e-117	2	Ddx21
Uck2	4.26e-120	0.273952	0.511	0.233	4.98e-116	2	Uck2
Ms4a4b	4.71e-120	-0.558631	0.997	0.993	5.51e-116	2	Ms4a4b
Erh.1	6.63e-119	0.418041	0.881	0.626	7.75e-115	2	Erh
Ubb	9.93e-119	-0.417122	0.999	0.998	1.16e-114	2	Ubb
Idi1	3.87e-118	0.300642	0.56	0.273	4.53e-114	2	Idi1
Timm10	4.61e-118	0.27042	0.576	0.279	5.39e-114	2	Timm10
Cbx5.1	1.04e-117	0.348673	0.763	0.437	1.21e-113	2	Cbx5
Hspbp1	3.17e-117	0.347009	0.66	0.365	3.71e-113	2	Hspbp1
H2-Q4	3.61e-117	-0.564902	0.915	0.906	4.23e-113	2	H2-Q4
Mrps28	9.43e-117	0.302867	0.653	0.35	1.1e-112	2	Mrps28
Ndufaf4	9.85e-117	0.272603	0.611	0.307	1.15e-112	2	Ndufaf4
Tomm5	1.59e-116	0.38323	0.927	0.72	1.86e-112	2	Tomm5
Rbbp7.1	4.09e-116	0.37915	0.877	0.596	4.79e-112	2	Rbbp7
Ptges3.1	1.41e-115	0.385669	0.913	0.659	1.65e-111	2	Ptges3
Paics	1.82e-115	0.366841	0.848	0.552	2.12e-111	2	Paics
Eef1e1	9.49e-115	0.33707	0.719	0.423	1.11e-110	2	Eef1e1
Fkbp4.1	1.94e-114	0.358034	0.81	0.517	2.27e-110	2	Fkbp4
Gmnn.1	1.86e-113	0.361832	0.795	0.479	2.17e-109	2	Gmnn
Exosc7	1.19e-112	0.310627	0.764	0.455	1.39e-108	2	Exosc7
Alad	3.05e-112	0.377979	0.762	0.476	3.57e-108	2	Alad
Ms4a6b	5.39e-112	-0.537971	0.985	0.982	6.31e-108	2	Ms4a6b
Cnbp	2.31e-111	0.330263	0.994	0.934	2.7e-107	2	Cnbp
Rrp1b	1.26e-110	0.273123	0.52	0.246	1.47e-106	2	Rrp1b
Ppan	3.25e-110	0.256329	0.54	0.26	3.8e-106	2	Ppan
Ube2c.1	3.27e-110	-1.44471	0.109	0.348	3.83e-106	2	Ube2c
Ltv1	3.88e-110	0.252557	0.505	0.236	4.53e-106	2	Ltv1
Rpf2	5.98e-110	0.282591	0.613	0.319	7e-106	2	Rpf2
Parp1	1.54e-109	0.289527	0.61	0.321	1.81e-105	2	Parp1
Pno1	1.96e-109	0.278976	0.588	0.299	2.29e-105	2	Pno1
Sdf2l1.1	3.98e-109	0.3893	0.81	0.531	4.66e-105	2	Sdf2l1
Prpf19	1.42e-108	0.290619	0.641	0.346	1.66e-104	2	Prpf19
Snrpb.1	1.39e-107	0.342918	0.986	0.884	1.63e-103	2	Snrpb
Dnajc9.1	2.57e-107	0.402016	0.943	0.726	3e-103	2	Dnajc9
Cdkn2d.1	2.62e-107	-0.579503	0.178	0.421	3.06e-103	2	Cdkn2d
Rpn1	2.14e-106	0.349931	0.761	0.481	2.5e-102	2	Rpn1
Cdca7l	6.64e-106	0.263677	0.565	0.285	7.76e-102	2	Cdca7l
Nudt5	7.28e-106	0.342708	0.798	0.517	8.52e-102	2	Nudt5
Cenpf.1	1.16e-105	-0.948117	0.055	0.285	1.36e-101	2	Cenpf
Pcbp1	1.42e-105	0.349673	0.949	0.781	1.67e-101	2	Pcbp1
Bzw2.1	1.92e-105	0.295351	0.682	0.383	2.25e-101	2	Bzw2
Polr2f	3.32e-105	0.347307	0.926	0.704	3.89e-101	2	Polr2f
Fdps	6.88e-105	0.299058	0.525	0.26	8.05e-101	2	Fdps
Sssca1	7.52e-105	0.325448	0.666	0.381	8.79e-101	2	Sssca1
Gspt1	1.9e-104	0.357314	0.873	0.624	2.23e-100	2	Gspt1
Ddx18	1.95e-104	0.315147	0.799	0.507	2.28e-100	2	Ddx18
Topbp1.1	2.97e-104	0.314438	0.739	0.436	3.48e-100	2	Topbp1
Pole4	3.76e-104	0.333259	0.903	0.633	4.4e-100	2	Pole4
H2-T22	3.84e-104	-0.545297	0.871	0.879	4.49e-100	2	H2-T22
Srsf3.1	2.93e-103	0.332421	0.994	0.914	3.43e-99	2	Srsf3
Hsp90aa1.1	4.55e-103	0.33895	0.995	0.923	5.32e-99	2	Hsp90aa1
Psma7	6.64e-103	0.32488	0.995	0.93	7.77e-99	2	Psma7
Smco4	2e-102	0.292177	0.632	0.349	2.33e-98	2	Smco4
Abce1	2.02e-102	0.298464	0.64	0.355	2.36e-98	2	Abce1
Hint1.1	3.02e-102	0.322401	0.996	0.954	3.53e-98	2	Hint1
Hat1.1	3.07e-102	0.292132	0.701	0.395	3.59e-98	2	Hat1
Hnrnpd.1	4.25e-102	0.374723	0.962	0.782	4.97e-98	2	Hnrnpd
U2af1.1	9.2e-102	0.363491	0.946	0.733	1.08e-97	2	U2af1
Mpp6	1.15e-101	0.314495	0.729	0.438	1.35e-97	2	Mpp6
Rcc2.1	1.78e-101	0.291157	0.665	0.374	2.08e-97	2	Rcc2
Eif1ax	4.07e-101	0.363523	0.924	0.711	4.76e-97	2	Eif1ax
Wdr43	1.16e-99	0.316982	0.755	0.464	1.35e-95	2	Wdr43
Naa50.1	1.64e-99	0.30102	0.751	0.464	1.92e-95	2	Naa50
Mrpl42.1	5.87e-99	0.343302	0.895	0.664	6.86e-95	2	Mrpl42
Nifk	1.12e-98	0.282668	0.64	0.357	1.31e-94	2	Nifk
Rars	6.47e-98	0.282416	0.658	0.378	7.56e-94	2	Rars
Eif5b	1.82e-97	0.348767	0.926	0.704	2.13e-93	2	Eif5b
Cdk2ap1	5.68e-97	0.330661	0.844	0.58	6.65e-93	2	Cdk2ap1
Srgn	1.03e-95	-0.517817	0.98	0.976	1.21e-91	2	Srgn
Dpy30	2.13e-95	0.332791	0.882	0.633	2.49e-91	2	Dpy30
Metrn	2.81e-95	0.254847	0.564	0.3	3.28e-91	2	Metrn
Hmmr.1	4.24e-95	-0.573037	0.044	0.255	4.96e-91	2	Hmmr
Hnrnpf.1	6.69e-95	0.282763	0.995	0.951	7.82e-91	2	Hnrnpf
Pop5	1.21e-94	0.33324	0.896	0.646	1.42e-90	2	Pop5
Hspa4	3.45e-94	0.333984	0.832	0.569	4.03e-90	2	Hspa4
Tmem238	1.14e-93	0.25383	0.53	0.274	1.33e-89	2	Tmem238
Ndufa4.1	2.01e-93	0.319881	0.993	0.934	2.35e-89	2	Ndufa4
Nudt19	3.43e-92	0.266009	0.621	0.35	4.02e-88	2	Nudt19
Eif3a	1.04e-91	0.378712	0.948	0.782	1.22e-87	2	Eif3a
Rfc5.1	5.52e-91	0.259863	0.629	0.341	6.46e-87	2	Rfc5
Mrpl18.1	5.88e-91	0.316701	0.951	0.745	6.87e-87	2	Mrpl18
Mrpl34	1.73e-90	0.303067	0.803	0.554	2.02e-86	2	Mrpl34
Pebp1	2.93e-90	0.330636	0.968	0.811	3.43e-86	2	Pebp1
Ccnb2.1	3.52e-90	-0.722309	0.103	0.318	4.12e-86	2	Ccnb2
Itm2b	1.81e-89	-0.353301	0.991	0.984	2.11e-85	2	Itm2b
Rfc1.1	2.42e-89	0.275226	0.72	0.429	2.83e-85	2	Rfc1
Pfdn5.1	3.36e-89	-0.357003	0.997	0.983	3.94e-85	2	Pfdn5
Hnrnpu.1	6.53e-88	0.36123	0.98	0.876	7.64e-84	2	Hnrnpu
Ruvbl1	1.11e-87	0.261632	0.681	0.401	1.3e-83	2	Ruvbl1
Gm42418	1.48e-87	-0.482097	1	1	1.73e-83	2	Gm42418
Rpl31	1.97e-87	0.254033	0.998	0.978	2.3e-83	2	Rpl31
Nip7	1.98e-87	0.251392	0.696	0.412	2.31e-83	2	Nip7
Fkbp3	1.31e-86	0.314473	0.977	0.854	1.53e-82	2	Fkbp3
Tcp1.1	4.95e-86	0.321935	0.913	0.68	5.79e-82	2	Tcp1
Fubp1	1.25e-84	0.324991	0.936	0.75	1.46e-80	2	Fubp1
Btg2	2.11e-84	-0.746177	0.688	0.778	2.47e-80	2	Btg2
Psma4	3.65e-84	0.307729	0.977	0.855	4.27e-80	2	Psma4
Idh3a	4.61e-84	0.289049	0.795	0.536	5.39e-80	2	Idh3a
Cox7b	4.79e-84	0.280215	0.988	0.936	5.6e-80	2	Cox7b
Nudc.1	9.46e-84	0.308994	0.906	0.684	1.11e-79	2	Nudc
Impdh2.1	9.7e-84	0.303182	0.848	0.554	1.13e-79	2	Impdh2
Cd53	1.43e-83	-0.541314	0.84	0.858	1.67e-79	2	Cd53
Atp5g3	5.15e-83	0.312249	0.979	0.847	6.02e-79	2	Atp5g3
Uqcr11	5.52e-83	0.294797	0.97	0.834	6.46e-79	2	Uqcr11
Slc1a5	1.07e-82	0.275904	0.73	0.458	1.25e-78	2	Slc1a5
Srsf10	1.65e-82	0.297183	0.876	0.635	1.93e-78	2	Srsf10
Cox7a2l.1	2.31e-82	-0.40362	0.969	0.949	2.7e-78	2	Cox7a2l
Lsm6.1	2.77e-82	0.30237	0.934	0.72	3.24e-78	2	Lsm6
Hnrnpa3.1	8.58e-82	0.322967	0.996	0.917	1e-77	2	Hnrnpa3
Rexo2.1	2.25e-81	0.273358	0.919	0.694	2.63e-77	2	Rexo2
Llph	8.34e-81	0.298747	0.94	0.766	9.75e-77	2	Llph
Jund.1	1.11e-80	-0.494084	0.993	0.987	1.29e-76	2	Jund
Gtpbp4	1.36e-80	0.285243	0.77	0.508	1.59e-76	2	Gtpbp4
Psmb5	2.21e-80	0.302684	0.956	0.801	2.59e-76	2	Psmb5
Cct7	1.64e-79	0.302377	0.971	0.829	1.92e-75	2	Cct7
Etf1	5.47e-79	0.282902	0.782	0.524	6.4e-75	2	Etf1
Birc5.1	8.36e-79	-1.18927	0.19	0.366	9.78e-75	2	Birc5
Txn1	9.85e-79	0.298579	0.994	0.957	1.15e-74	2	Txn1
Chchd1	1.21e-78	0.297223	0.878	0.644	1.41e-74	2	Chchd1
Pnrc1	1.3e-78	-0.531372	0.827	0.838	1.52e-74	2	Pnrc1
Mrpl17	2.37e-78	0.277506	0.742	0.493	2.77e-74	2	Mrpl17
Srsf6	2.59e-78	0.288792	0.852	0.61	3.03e-74	2	Srsf6
Psmb2	7.2e-78	0.296966	0.966	0.835	8.42e-74	2	Psmb2
Mrpl23.1	8.65e-78	0.289649	0.894	0.662	1.01e-73	2	Mrpl23
Mrpl15	1.06e-77	0.267782	0.81	0.561	1.24e-73	2	Mrpl15
Nop10	2.52e-77	0.311838	0.95	0.781	2.95e-73	2	Nop10
Npm3	4.26e-77	0.329462	0.915	0.719	4.98e-73	2	Npm3
Cdca3.1	4.57e-77	-0.429227	0.087	0.277	5.35e-73	2	Cdca3
H2-Q7	4.84e-77	-0.431222	0.951	0.921	5.66e-73	2	H2-Q7
Hspa8.1	5.72e-77	0.27644	1	0.987	6.69e-73	2	Hspa8
Rif1.1	7.13e-77	0.267195	0.735	0.459	8.34e-73	2	Rif1
Ssrp1.1	7.36e-77	0.299395	0.88	0.623	8.61e-73	2	Ssrp1
Timm13	1.2e-76	0.294047	0.95	0.796	1.41e-72	2	Timm13
Alyref.1	1.31e-76	0.287577	0.89	0.628	1.54e-72	2	Alyref
Ndufa5.1	1.53e-76	0.279468	0.896	0.661	1.79e-72	2	Ndufa5
Pin1	2.42e-75	0.262864	0.801	0.545	2.83e-71	2	Pin1
Bcap29	2.88e-75	0.276462	0.73	0.475	3.37e-71	2	Bcap29
Ssb	3.77e-75	0.297421	0.971	0.859	4.41e-71	2	Ssb
Erg28	1.19e-74	0.25682	0.771	0.501	1.39e-70	2	Erg28
Gimap1	3.29e-74	-0.406984	0.928	0.903	3.85e-70	2	Gimap1
Gmps	4.66e-74	0.260595	0.729	0.483	5.45e-70	2	Gmps
Snrpa	8.78e-74	0.26076	0.789	0.528	1.03e-69	2	Snrpa
Prelid3b	1.6e-73	0.260629	0.7	0.45	1.87e-69	2	Prelid3b
Ssbp4	3.27e-72	0.269242	0.876	0.646	3.83e-68	2	Ssbp4
Magohb	3.85e-72	0.257515	0.719	0.466	4.51e-68	2	Magohb
Atp5b	4.29e-72	0.260966	0.995	0.955	5.02e-68	2	Atp5b
Cd8b1	5.64e-72	-0.398948	0.991	0.971	6.6e-68	2	Cd8b1
Jun	7.37e-72	-0.851667	0.652	0.737	8.62e-68	2	Jun
Psma2	7.9e-72	0.258178	0.987	0.914	9.24e-68	2	Psma2
Ndufa12	8.24e-72	0.275424	0.944	0.769	9.64e-68	2	Ndufa12
Eif3j1	1.15e-71	0.279591	0.769	0.526	1.34e-67	2	Eif3j1
Glrx3	1.51e-71	0.284014	0.91	0.717	1.77e-67	2	Glrx3
Slbp.1	3.3e-71	0.26446	0.888	0.641	3.86e-67	2	Slbp
Syncrip	3.47e-71	0.294183	0.866	0.63	4.06e-67	2	Syncrip
Bola2	1.98e-70	0.286631	0.968	0.835	2.32e-66	2	Bola2
Aprt	5.89e-70	0.330246	0.977	0.878	6.89e-66	2	Aprt
Atp5j	6.11e-70	0.253798	0.995	0.938	7.14e-66	2	Atp5j
Klf6	1.23e-69	-0.70356	0.845	0.87	1.43e-65	2	Klf6
Metap2	1.48e-69	0.283529	0.92	0.731	1.74e-65	2	Metap2
Hprt	3.28e-69	0.280757	0.935	0.748	3.84e-65	2	Hprt
Mat2a	7.16e-68	0.267592	0.78	0.538	8.38e-64	2	Mat2a
Atp5f1	1.58e-67	0.25524	0.996	0.936	1.85e-63	2	Atp5f1
Tmem14c	2.37e-67	0.276477	0.939	0.779	2.77e-63	2	Tmem14c
Cct2	3.63e-67	0.267061	0.972	0.854	4.25e-63	2	Cct2
Txnl4a	4.52e-67	0.258992	0.841	0.613	5.29e-63	2	Txnl4a
Hist1h1c	6.15e-66	-0.638599	0.646	0.699	7.2e-62	2	Hist1h1c
Pdia6	7.13e-66	0.307259	0.94	0.752	8.34e-62	2	Pdia6
Tpi1	1.13e-65	0.275218	0.969	0.825	1.32e-61	2	Tpi1
Ifngr1.1	2.08e-65	-0.689223	0.708	0.755	2.43e-61	2	Ifngr1
Dhx9	4.72e-65	0.250209	0.788	0.552	5.52e-61	2	Dhx9
Eprs	1.34e-64	0.27683	0.822	0.584	1.57e-60	2	Eprs
Uqcc2	2.49e-64	0.254847	0.926	0.72	2.91e-60	2	Uqcc2
Ccna2.1	3.55e-64	-0.553085	0.114	0.28	4.15e-60	2	Ccna2
Rpa3.1	2.03e-63	0.250834	0.798	0.536	2.37e-59	2	Rpa3
Fyb	2.55e-63	-0.425798	0.921	0.905	2.98e-59	2	Fyb
Ndufb2	1.36e-62	0.251651	0.913	0.712	1.6e-58	2	Ndufb2
Scand1	2.72e-62	-0.367313	0.95	0.926	3.19e-58	2	Scand1
Cdk6.1	2.9e-62	0.283367	0.899	0.699	3.4e-58	2	Cdk6
Nme2	6.11e-62	0.258353	0.739	0.507	7.14e-58	2	Nme2
Cdca8.1	7.12e-62	-0.760701	0.193	0.345	8.32e-58	2	Cdca8
Clic1	9.56e-62	-0.267801	0.994	0.982	1.12e-57	2	Clic1
Rps27	1.57e-61	-0.294432	1	0.999	1.83e-57	2	Rps27
Supt16.1	4.88e-61	0.271956	0.832	0.608	5.71e-57	2	Supt16
Banf1.1	7.6e-61	0.254348	0.916	0.673	8.88e-57	2	Banf1
H2afv.1	1.98e-60	-0.715031	0.791	0.758	2.32e-56	2	H2afv
Pgam1	3.79e-60	0.27416	0.96	0.82	4.43e-56	2	Pgam1
Trac	4.01e-60	-0.350975	0.992	0.975	4.69e-56	2	Trac
Pdap1.1	6.15e-60	0.270442	0.934	0.738	7.2e-56	2	Pdap1
Etfb	6.28e-60	0.299319	0.91	0.729	7.35e-56	2	Etfb
Cenpe.1	3.22e-59	-0.534067	0.115	0.278	3.77e-55	2	Cenpe
Dbi.1	7.76e-59	0.267742	0.933	0.755	9.08e-55	2	Dbi
Hpf1.1	8.68e-59	0.251174	0.892	0.659	1.02e-54	2	Hpf1
Hist1h2af.1	2.48e-58	-0.272471	0.036	0.18	2.91e-54	2	Hist1h2af
Eif1	3.11e-58	-0.251434	1	0.997	3.64e-54	2	Eif1
Mrpl20	3.25e-57	0.250627	0.898	0.708	3.8e-53	2	Mrpl20
Gm8369	5.72e-57	-0.605335	0.7	0.736	6.69e-53	2	Gm8369
Ubald2.1	9.88e-57	-0.439471	0.399	0.531	1.16e-52	2	Ubald2
Pdcd4	2.49e-56	-0.521885	0.563	0.67	2.91e-52	2	Pdcd4
Cdkn1b	2.8e-56	-0.469538	0.422	0.547	3.28e-52	2	Cdkn1b
Selplg	8.26e-56	-0.39115	0.947	0.926	9.67e-52	2	Selplg
Ccng2	1.5e-55	-0.250749	0.066	0.218	1.75e-51	2	Ccng2
Rbm39	2.75e-55	-0.308059	0.995	0.981	3.22e-51	2	Rbm39
Cdkn3.1	5.16e-55	-0.29347	0.063	0.212	6.03e-51	2	Cdkn3
Nusap1.1	1.44e-54	-0.830288	0.154	0.297	1.68e-50	2	Nusap1
Slfn2.1	4.4e-54	-0.598866	0.726	0.771	5.14e-50	2	Slfn2
Rsrp1	4.57e-54	-0.451691	0.866	0.861	5.35e-50	2	Rsrp1
Gimap6	1.09e-53	-0.487671	0.842	0.845	1.28e-49	2	Gimap6
Ypel3.1	1.51e-53	-0.461942	0.354	0.486	1.77e-49	2	Ypel3
Ybx3	5.76e-53	0.261856	0.953	0.839	6.73e-49	2	Ybx3
Tax1bp1	6.23e-53	-0.403807	0.726	0.741	7.29e-49	2	Tax1bp1
Npc2	1.93e-52	-0.404259	0.905	0.901	2.25e-48	2	Npc2
Supt4a	3.69e-51	-0.33426	0.908	0.875	4.32e-47	2	Supt4a
Gimap3	1.65e-50	-0.557559	0.865	0.865	1.93e-46	2	Gimap3
Hist1h2ab.1	1.95e-50	-0.628077	0.109	0.252	2.28e-46	2	Hist1h2ab
Nrgn	2.56e-49	0.257622	0.829	0.631	3e-45	2	Nrgn
Laptm5.1	5.58e-49	-0.303166	0.994	0.98	6.53e-45	2	Laptm5
Gmfg	6.82e-49	-0.351024	0.961	0.935	7.97e-45	2	Gmfg
Kif23.1	9.32e-49	-0.337045	0.093	0.235	1.09e-44	2	Kif23
Ccl5.1	1.61e-48	-1.67465	0.733	0.774	1.88e-44	2	Ccl5
Cenpa.1	1.73e-48	-0.809743	0.619	0.636	2.02e-44	2	Cenpa
Ube2b	1.28e-47	-0.319222	0.851	0.834	1.5e-43	2	Ube2b
Knl1.1	1.92e-47	-0.447488	0.123	0.262	2.24e-43	2	Knl1
Esco2.1	3.8e-47	-0.378276	0.082	0.219	4.44e-43	2	Esco2
Gabarap.1	6.9e-47	-0.313231	0.933	0.909	8.07e-43	2	Gabarap
Saraf	1.23e-46	-0.38927	0.69	0.725	1.43e-42	2	Saraf
Ckap2l.1	2.42e-46	-0.282182	0.076	0.211	2.83e-42	2	Ckap2l
Cep55.1	4.87e-46	-0.322809	0.116	0.255	5.69e-42	2	Cep55
Hcst.1	1.83e-44	-0.403708	0.976	0.957	2.14e-40	2	Hcst
Paip2	2.59e-44	-0.326477	0.845	0.819	3.02e-40	2	Paip2
Ltb	8.29e-44	-0.429846	0.985	0.969	9.69e-40	2	Ltb
Prf1.1	2.38e-43	0.32256	0.904	0.797	2.79e-39	2	Prf1
Gpsm3	5.44e-41	-0.323651	0.857	0.827	6.37e-37	2	Gpsm3
Myl12b	6.74e-41	-0.258781	0.987	0.968	7.88e-37	2	Myl12b
Fcer1g.1	7.08e-41	0.433693	0.621	0.445	8.28e-37	2	Fcer1g
Knstrn.1	1.76e-40	-0.356927	0.172	0.302	2.06e-36	2	Knstrn
Hist1h1e.1	5.66e-40	-0.678453	0.84	0.807	6.62e-36	2	Hist1h1e
Mcl1	1.79e-39	-0.367582	0.833	0.82	2.1e-35	2	Mcl1
Txnip.1	6.66e-39	-0.539058	0.377	0.486	7.79e-35	2	Txnip
Shisa5	1.76e-38	-0.347798	0.993	0.979	2.05e-34	2	Shisa5
Chd2	1.87e-38	-0.42275	0.656	0.696	2.19e-34	2	Chd2
Cd82	2.61e-38	-0.414552	0.54	0.607	3.05e-34	2	Cd82
Aspm.1	1.43e-37	-0.283535	0.07	0.185	1.68e-33	2	Aspm
Tmem50a	1.65e-37	-0.272883	0.93	0.895	1.93e-33	2	Tmem50a
Tpx2.1	7.01e-37	-0.480493	0.168	0.282	8.19e-33	2	Tpx2
Prr13.1	1.07e-36	-0.332607	0.822	0.801	1.25e-32	2	Prr13
Stk17b	1.14e-36	-0.325223	0.955	0.924	1.34e-32	2	Stk17b
Sat1	1.82e-36	-0.500183	0.614	0.66	2.13e-32	2	Sat1
Pold4.1	2.59e-36	-0.351422	0.61	0.633	3.03e-32	2	Pold4
Cdk2ap2.1	5.69e-36	-0.343481	0.765	0.754	6.66e-32	2	Cdk2ap2
Rps27rt	5.93e-36	-0.319458	0.988	0.979	6.93e-32	2	Rps27rt
Hist1h3f.1	1.43e-35	-0.353292	0.161	0.276	1.68e-31	2	Hist1h3f
Ppp1r18	3.04e-35	-0.317463	0.804	0.784	3.55e-31	2	Ppp1r18
Cdc20.1	6.58e-35	-0.477766	0.136	0.249	7.7e-31	2	Cdc20
Kif11.1	8.77e-35	-0.336081	0.13	0.245	1.03e-30	2	Kif11
Tmem234	9.06e-35	-0.299834	0.842	0.803	1.06e-30	2	Tmem234
Traf1	1.69e-34	-0.410961	0.598	0.638	1.97e-30	2	Traf1
Map1lc3b	2.45e-33	-0.290872	0.902	0.87	2.86e-29	2	Map1lc3b
Akap13	5.18e-33	-0.332456	0.921	0.901	6.05e-29	2	Akap13
Ahnak	8.66e-33	-0.469038	0.789	0.781	1.01e-28	2	Ahnak
Lars2	1.96e-32	-0.414316	0.876	0.857	2.3e-28	2	Lars2
Tmem59	3.62e-32	-0.305202	0.685	0.694	4.24e-28	2	Tmem59
Racgap1.1	6.6e-32	-0.386996	0.269	0.36	7.72e-28	2	Racgap1
Rdm1	7.01e-32	-0.264403	0.224	0.338	8.2e-28	2	Rdm1
Cd69.1	8.36e-32	-0.562185	0.672	0.697	9.78e-28	2	Cd69
Tsc22d3.1	1.94e-31	-0.484847	0.294	0.398	2.26e-27	2	Tsc22d3
Lockd.1	7.93e-31	-0.438454	0.295	0.384	9.28e-27	2	Lockd
Ifi203	1.36e-30	-0.466989	0.881	0.867	1.59e-26	2	Ifi203
Rinl	1.58e-30	-0.288318	0.857	0.821	1.84e-26	2	Rinl
Hist2h2bb.1	3.36e-30	-0.320452	0.187	0.291	3.93e-26	2	Hist2h2bb
Clec2d	1.03e-29	-0.404362	0.558	0.603	1.2e-25	2	Clec2d
Rhoh	2.59e-29	-0.370818	0.802	0.798	3.03e-25	2	Rhoh
Fosb	3.15e-29	-0.664633	0.592	0.644	3.69e-25	2	Fosb
Mndal	6.91e-29	-0.439063	0.918	0.899	8.09e-25	2	Mndal
Ptprc	7.63e-29	-0.273092	0.995	0.989	8.93e-25	2	Ptprc
Grap	9.15e-29	-0.327828	0.582	0.617	1.07e-24	2	Grap
Hist1h3i.1	4.08e-28	-0.260904	0.128	0.231	4.77e-24	2	Hist1h3i
Klf2.1	7.28e-28	-1.07388	0.388	0.477	8.52e-24	2	Klf2
Sdf4	2.12e-27	-0.440302	0.929	0.872	2.47e-23	2	Sdf4
Mxd4	3.14e-27	-0.355434	0.286	0.375	3.68e-23	2	Mxd4
Rabac1	6.73e-27	-0.345993	0.772	0.757	7.88e-23	2	Rabac1
Junb	7.39e-27	-0.596487	0.892	0.879	8.64e-23	2	Junb
Cd2	1.08e-26	-0.346128	0.834	0.817	1.26e-22	2	Cd2
Hist1h4h.1	1.79e-26	-0.255618	0.133	0.231	2.09e-22	2	Hist1h4h
Clk1	3.06e-26	-0.38677	0.717	0.711	3.59e-22	2	Clk1
4930523C07Rik	3.82e-26	-0.375011	0.476	0.528	4.47e-22	2	4930523C07Rik
Calm2	4.66e-26	-0.318888	0.95	0.886	5.45e-22	2	Calm2
Leprotl1	1.06e-25	-0.27233	0.857	0.803	1.24e-21	2	Leprotl1
Cd28	4.19e-25	-0.35862	0.758	0.751	4.9e-21	2	Cd28
Hist1h3c.1	9.59e-25	-0.901725	0.226	0.298	1.12e-20	2	Hist1h3c
Hist1h2be.1	9.95e-25	-0.344743	0.244	0.328	1.16e-20	2	Hist1h2be
Ablim1	1.75e-24	-0.359307	0.699	0.701	2.05e-20	2	Ablim1
Kmt2e	1.78e-24	-0.314847	0.694	0.688	2.08e-20	2	Kmt2e
Kif15.1	2.14e-24	-0.35768	0.35	0.416	2.5e-20	2	Kif15
Klrc2.1	3.25e-24	-0.337382	0.852	0.792	3.8e-20	2	Klrc2
Pttg1.1	4.21e-24	-0.675749	0.468	0.483	4.92e-20	2	Pttg1
Tnrc6b	4.48e-24	-0.337033	0.484	0.538	5.24e-20	2	Tnrc6b
Fos.1	4.77e-24	-0.648394	0.363	0.448	5.58e-20	2	Fos
Srsf5	4.93e-24	-0.275822	0.969	0.942	5.77e-20	2	Srsf5
Bcl11b.1	1.19e-23	-0.423624	0.49	0.538	1.39e-19	2	Bcl11b
Nop53	2.23e-23	-0.278279	0.817	0.779	2.61e-19	2	Nop53
Arhgap45	2.31e-23	-0.329986	0.595	0.616	2.7e-19	2	Arhgap45
Zfp36l2.1	4.86e-23	-0.521306	0.758	0.735	5.68e-19	2	Zfp36l2
Tuba1a	1.03e-22	-0.313666	0.559	0.57	1.21e-18	2	Tuba1a
Nsd3	1.19e-22	-0.361383	0.737	0.721	1.39e-18	2	Nsd3
Neat1	1.93e-22	-0.438391	0.481	0.538	2.26e-18	2	Neat1
Hist1h2an.1	2.49e-22	-0.470434	0.175	0.256	2.91e-18	2	Hist1h2an
Tnfaip3	4.05e-22	-0.420494	0.445	0.504	4.73e-18	2	Tnfaip3
Aurkb.1	6e-22	-0.291947	0.174	0.256	7.02e-18	2	Aurkb
Slamf6.1	7.59e-22	-0.326177	0.071	0.15	8.87e-18	2	Slamf6
Trim59	9.62e-22	-0.293958	0.345	0.413	1.13e-17	2	Trim59
Ier5	1.33e-21	-0.393034	0.657	0.667	1.55e-17	2	Ier5
H2afx.1	2.32e-21	-0.798816	0.48	0.471	2.72e-17	2	H2afx
Sp140	7.66e-21	-0.300697	0.446	0.493	8.96e-17	2	Sp140
Hist1h3e.1	8.18e-21	-0.536595	0.346	0.39	9.56e-17	2	Hist1h3e
Elf1	1.57e-20	-0.268908	0.853	0.809	1.84e-16	2	Elf1
Emp3.1	2.2e-20	-0.489433	0.625	0.635	2.57e-16	2	Emp3
Klrk1	2.52e-20	-0.292941	0.919	0.865	2.95e-16	2	Klrk1
Klrc1.1	7.12e-20	-0.279235	0.894	0.834	8.32e-16	2	Klrc1
Brd8	9.63e-20	-0.267152	0.322	0.388	1.13e-15	2	Brd8
Dusp11	1.26e-19	-0.253141	0.813	0.771	1.47e-15	2	Dusp11
Tecpr1	2.16e-19	-0.273348	0.2	0.279	2.52e-15	2	Tecpr1
Slfn5.1	2.57e-19	-0.39644	0.043	0.107	3.01e-15	2	Slfn5
Hist1h4d.1	5.26e-19	-0.687105	0.623	0.572	6.15e-15	2	Hist1h4d
Serinc3	6.79e-19	-0.287461	0.77	0.714	7.94e-15	2	Serinc3
Hist1h2ap.1	7.94e-19	-1.01971	0.297	0.347	9.29e-15	2	Hist1h2ap
Il7r.1	1.13e-18	-0.538085	0.217	0.294	1.32e-14	2	Il7r
Hist1h2ae.1	1.72e-18	-1.28991	0.412	0.425	2.01e-14	2	Hist1h2ae
AY036118	2.22e-18	-0.356309	0.932	0.897	2.6e-14	2	AY036118
Ube2h	2.66e-18	-0.268181	0.365	0.423	3.11e-14	2	Ube2h
Gimap4	2.75e-18	-0.269029	0.953	0.917	3.21e-14	2	Gimap4
Smap1	4.08e-18	-0.267314	0.782	0.746	4.77e-14	2	Smap1
Irf2	5.75e-18	-0.263205	0.713	0.695	6.72e-14	2	Irf2
Fbxo5.1	7.48e-18	-0.274923	0.166	0.24	8.75e-14	2	Fbxo5
Arid5b	1.51e-17	-0.309818	0.46	0.506	1.76e-13	2	Arid5b
9930111J21Rik2	1.55e-17	-0.346034	0.416	0.464	1.81e-13	2	9930111J21Rik2
Dusp1	2.2e-17	-0.416754	0.335	0.397	2.58e-13	2	Dusp1
Tmem71	2.48e-17	-0.285826	0.372	0.428	2.9e-13	2	Tmem71
Slc38a2	3.05e-17	-0.312401	0.849	0.805	3.56e-13	2	Slc38a2
Bnip3l	3.48e-17	-0.275458	0.717	0.684	4.07e-13	2	Bnip3l
Smpdl3a	4.85e-17	-0.285571	0.342	0.395	5.68e-13	2	Smpdl3a
Prc1.1	6.17e-17	-0.575483	0.264	0.312	7.21e-13	2	Prc1
Slfn1.1	9.64e-17	-0.459317	0.385	0.44	1.13e-12	2	Slfn1
Hist1h1d.1	9.96e-17	-0.508727	0.46	0.469	1.17e-12	2	Hist1h1d
1700097N02Rik	1e-16	-0.317523	0.446	0.49	1.17e-12	2	1700097N02Rik
Klrd1.1	1.61e-16	-0.269701	0.966	0.911	1.88e-12	2	Klrd1
Cxcr3.1	1.72e-16	-0.391703	0.131	0.203	2.01e-12	2	Cxcr3
Emb.1	1.9e-16	-0.4917	0.167	0.244	2.22e-12	2	Emb
Tacc3.1	1.93e-16	-0.252787	0.207	0.273	2.25e-12	2	Tacc3
Ccr2	3.08e-16	-0.444788	0.125	0.195	3.6e-12	2	Ccr2
Sp100	3.2e-16	-0.306269	0.899	0.852	3.75e-12	2	Sp100
Gm20186.1	4.24e-16	-0.313758	0.138	0.214	4.96e-12	2	Gm20186
Il18r1	1.44e-15	-0.384145	0.498	0.523	1.69e-11	2	Il18r1
Itgb7.1	1.61e-15	-0.356348	0.129	0.199	1.88e-11	2	Itgb7
Ogt	2.12e-15	-0.307427	0.681	0.667	2.48e-11	2	Ogt
Rgs1.1	2.95e-15	-0.42379	0.812	0.795	3.45e-11	2	Rgs1
Atf7ip	2.95e-15	-0.277842	0.401	0.449	3.45e-11	2	Atf7ip
Utrn	4.02e-15	-0.307305	0.412	0.452	4.7e-11	2	Utrn
Pld3.1	1.54e-14	-0.263506	0.62	0.613	1.8e-10	2	Pld3
Phf11b	1.67e-14	-0.336686	0.633	0.637	1.95e-10	2	Phf11b
Il2rg	1.74e-14	-0.25234	0.851	0.806	2.04e-10	2	Il2rg
Tespa1.1	2.02e-14	-0.27045	0.153	0.219	2.36e-10	2	Tespa1
Ube2s.1	2.17e-14	-0.456977	0.902	0.793	2.53e-10	2	Ube2s
Tubb4b.1	2.29e-14	-0.836451	0.659	0.572	2.68e-10	2	Tubb4b
Itga4.1	5.3e-14	-0.30645	0.775	0.748	6.2e-10	2	Itga4
Smad7	5.87e-14	-0.362716	0.455	0.486	6.87e-10	2	Smad7
Gimap9	7.14e-14	-0.315061	0.625	0.604	8.36e-10	2	Gimap9
Hist2h2ac.1	8.64e-14	-0.379335	0.339	0.368	1.01e-09	2	Hist2h2ac
Hp1bp3	1.11e-13	-0.282692	0.71	0.651	1.3e-09	2	Hp1bp3
Ppp1r10	1.16e-13	-0.290866	0.416	0.449	1.35e-09	2	Ppp1r10
Gzmk	1.21e-13	-0.356887	0.232	0.296	1.42e-09	2	Gzmk
Samhd1.1	2.4e-13	-0.510693	0.592	0.591	2.81e-09	2	Samhd1
Lilr4b	3.85e-13	-0.25547	0.102	0.16	4.5e-09	2	Lilr4b
Dap	4.17e-13	-0.277029	0.722	0.681	4.87e-09	2	Dap
Peli1	4.46e-13	-0.301417	0.575	0.578	5.22e-09	2	Peli1
2810474O19Rik	9.39e-13	-0.355822	0.507	0.517	1.1e-08	2	2810474O19Rik
Ctla2a.1	2.19e-12	-0.479093	0.825	0.786	2.56e-08	2	Ctla2a
Ifi209	2.57e-12	-0.358568	0.413	0.452	3.01e-08	2	Ifi209
Gimap5	2.84e-12	-0.261134	0.809	0.767	3.32e-08	2	Gimap5
Crbn	3.15e-12	-0.255489	0.617	0.599	3.69e-08	2	Crbn
Gna13	3.38e-12	-0.288148	0.438	0.46	3.95e-08	2	Gna13
Zcchc11	4.64e-12	-0.340369	0.601	0.585	5.43e-08	2	Zcchc11
Bhlhe40.1	4.74e-12	-0.330547	0.625	0.629	5.54e-08	2	Bhlhe40
Sh2d1a	4.84e-12	-0.262916	0.784	0.743	5.66e-08	2	Sh2d1a
Vps37b.1	5.18e-12	-0.343526	0.817	0.756	6.06e-08	2	Vps37b
Vgll4	6.19e-12	-0.279806	0.573	0.574	7.24e-08	2	Vgll4
Ets1	6.95e-12	-0.252172	0.945	0.904	8.13e-08	2	Ets1
Ifit3.1	2.23e-11	-0.410152	0.095	0.148	2.61e-07	2	Ifit3
Ppp1r15a	2.3e-11	-0.322343	0.572	0.564	2.7e-07	2	Ppp1r15a
Zdhhc18	2.4e-11	-0.267471	0.784	0.746	2.81e-07	2	Zdhhc18
Serpinb6b.1	2.75e-11	-0.488889	0.467	0.491	3.22e-07	2	Serpinb6b
Irf7.1	5.15e-11	-0.399486	0.373	0.411	6.02e-07	2	Irf7
Hif1a	5.46e-11	-0.293231	0.811	0.757	6.39e-07	2	Hif1a
Incenp.1	7.46e-11	-0.265947	0.271	0.308	8.73e-07	2	Incenp
Zfp36l1.1	7.63e-11	-0.359728	0.586	0.576	8.92e-07	2	Zfp36l1
Cks2.1	9.93e-11	-0.499212	0.582	0.513	1.16e-06	2	Cks2
Pmepa1.1	1.93e-10	-0.265745	0.07	0.117	2.26e-06	2	Pmepa1
Parp14	2.16e-10	-0.305801	0.478	0.489	2.53e-06	2	Parp14
Rad21.1	2.98e-10	-0.301878	0.535	0.507	3.49e-06	2	Rad21
Gpr183.1	3.17e-10	-0.388139	0.373	0.4	3.71e-06	2	Gpr183
Ifi214	5.56e-10	-0.364245	0.408	0.438	6.5e-06	2	Ifi214
Mki67.1	8.77e-10	-0.832159	0.422	0.405	1.03e-05	2	Mki67
Kmt2a	9.64e-10	-0.256601	0.673	0.634	1.13e-05	2	Kmt2a
Icos	1.08e-09	-0.289453	0.349	0.384	1.26e-05	2	Icos
Gbp2b.1	1.1e-09	-0.268707	0.16	0.21	1.28e-05	2	Gbp2b
Ifit1.1	1.41e-09	-0.346066	0.097	0.144	1.65e-05	2	Ifit1
Ubc	1.44e-09	-0.283949	0.696	0.666	1.68e-05	2	Ubc
Epsti1	2.39e-09	-0.259637	0.782	0.733	2.8e-05	2	Epsti1
Adgre5	3.45e-09	-0.252135	0.513	0.508	4.03e-05	2	Adgre5
Hspa1b.1	3.56e-09	-0.737426	0.3	0.348	4.16e-05	2	Hspa1b
Hjurp.1	4.34e-09	-0.281827	0.32	0.341	5.08e-05	2	Hjurp
Tubb5.1	5.57e-09	-0.726489	0.978	0.834	6.52e-05	2	Tubb5
Smc4.1	5.58e-09	-0.397756	0.837	0.713	6.53e-05	2	Smc4
Socs1	9.73e-09	-0.272031	0.481	0.486	0.000113801	2	Socs1
Itpkb	1.27e-08	-0.27673	0.455	0.461	0.000148954	2	Itpkb
Zbp1.1	1.38e-08	-0.356413	0.663	0.637	0.000161634	2	Zbp1
Foxp1.1	2.27e-08	-0.270686	0.397	0.426	0.000265919	2	Foxp1
Stat4	2.37e-08	-0.258727	0.522	0.514	0.000277517	2	Stat4
Samd9l	3.46e-08	-0.317602	0.481	0.483	0.000404706	2	Samd9l
Gbp4	4.4e-08	-0.278297	0.766	0.727	0.000514993	2	Gbp4
Nabp1.1	5.69e-08	-0.274614	0.758	0.711	0.000665967	2	Nabp1
Pim1	6.09e-08	-0.363447	0.572	0.559	0.000712395	2	Pim1
Arl4c.1	6.93e-08	-0.37741	0.462	0.468	0.00081108	2	Arl4c
Ly6c2.1	7.43e-08	-0.660937	0.507	0.523	0.000869124	2	Ly6c2
Ccl4.1	1.13e-07	-0.287976	0.76	0.676	0.00131724	2	Ccl4
Ly6c1.1	1.54e-07	-0.395174	0.283	0.319	0.00180499	2	Ly6c1
Tuba1c.1	1.82e-07	-0.43464	0.54	0.49	0.00212578	2	Tuba1c
Itgb1.1	4.67e-07	-0.317585	0.775	0.721	0.00545901	2	Itgb1
Tnfrsf18.1	5.16e-07	-0.261656	0.867	0.802	0.00603324	2	Tnfrsf18
Ctla4	7.68e-07	-0.255888	0.313	0.35	0.00898639	2	Ctla4
Isg15.1	7.85e-07	-0.616524	0.409	0.43	0.00918543	2	Isg15
Gm12840.1	1.03e-06	-0.386454	0.228	0.272	0.0120324	2	Gm12840
Pclaf.1	1.26e-06	-0.481597	0.597	0.415	0.014796	2	Pclaf
Hopx	1.82e-06	-0.333558	0.401	0.404	0.0213454	2	Hopx
AC149090.1	2.31e-06	-0.250013	0.634	0.589	0.0270292	2	AC149090.1
Ccdc34.1	3.21e-06	-0.267463	0.38	0.378	0.0375948	2	Ccdc34
Hspa1a.1	3.39e-06	-0.58887	0.219	0.259	0.0396849	2	Hspa1a
Dusp2.1	3.69e-06	-0.296961	0.816	0.773	0.0431877	2	Dusp2
Gramd3.1	6.45e-06	-0.281113	0.226	0.255	0.0753973	2	Gramd3
Gm26825	7.67e-06	-0.336973	0.515	0.507	0.0897675	2	Gm26825
Isg20	8.35e-06	-0.3063	0.324	0.351	0.0976628	2	Isg20
Rtp4.1	1.72e-05	-0.28166	0.311	0.327	0.200783	2	Rtp4
Dusp5.1	2.13e-05	-0.25387	0.488	0.481	0.248562	2	Dusp5
Zfp36	2.19e-05	-0.366664	0.404	0.407	0.256133	2	Zfp36
Fgl2.1	3.14e-05	-0.273295	0.602	0.582	0.367443	2	Fgl2
Ier2	5.3e-05	-0.251489	0.823	0.756	0.619878	2	Ier2
Hmgb2.1	7.71e-05	-0.63615	0.99	0.932	0.901961	2	Hmgb2
Ly6e.1	0.000113145	-0.301447	0.943	0.846	1	2	Ly6e
Ifi27l2a	0.000123496	-0.321466	0.876	0.87	1	2	Ifi27l2a
Cst3	0.000218713	-0.426518	0.906	0.81	1	2	Cst3
Ikzf2	0.000573731	-0.297397	0.493	0.477	1	2	Ikzf2
Hist1h1b.1	0	2.9417	0.991	0.317	0	5	Hist1h1b
Hist1h2ae.2	0	2.84712	0.992	0.303	0	5	Hist1h2ae
Hist1h2ap.2	0	2.45258	0.95	0.209	0	5	Hist1h2ap
Pclaf.2	0	2.37459	1	0.336	0	5	Pclaf
Tubb5.2	0	2.30339	1	0.834	0	5	Tubb5
Hist1h3c.2	0	2.26763	0.969	0.14	0	5	Hist1h3c
Top2a.1	0	2.17304	0.998	0.43	0	5	Top2a
Tuba1b.1	0	2.07517	0.999	0.7	0	5	Tuba1b
Ube2c.2	0	1.89959	0.848	0.185	0	5	Ube2c
Birc5.2	0	1.87228	0.99	0.192	0	5	Birc5
Hist1h4d.2	0	1.82414	0.99	0.496	0	5	Hist1h4d
Rrm2.1	0	1.80605	0.97	0.175	0	5	Rrm2
Mki67.2	0	1.79824	0.969	0.291	0	5	Mki67
Nusap1.2	0	1.78115	0.954	0.124	0	5	Nusap1
Hmgb2.2	0	1.75064	1	0.932	0	5	Hmgb2
Hist1h2ab.2	0	1.74481	0.906	0.08	0	5	Hist1h2ab
H2afx.2	0	1.71836	0.972	0.368	0	5	H2afx
Tubb4b.2	0	1.67246	0.99	0.505	0	5	Tubb4b
Hist1h1e.2	0	1.6385	0.996	0.775	0	5	Hist1h1e
Hist1h3e.2	0	1.54598	0.939	0.264	0	5	Hist1h3e
Smc2.1	0	1.53684	0.984	0.37	0	5	Smc2
Stmn1.1	0	1.53627	0.972	0.374	0	5	Stmn1
Cdca8.2	0	1.49083	0.961	0.179	0	5	Cdca8
Spc24.1	0	1.47636	0.973	0.229	0	5	Spc24
Hist1h2an.2	0	1.4708	0.842	0.113	0	5	Hist1h2an
Cks1b.1	0	1.46715	0.98	0.308	0	5	Cks1b
Prc1.2	0	1.45292	0.915	0.174	0	5	Prc1
Cenpf.2	0	1.34038	0.824	0.115	0	5	Cenpf
Cdk1.1	0	1.32675	0.949	0.186	0	5	Cdk1
Ccna2.2	0	1.32369	0.918	0.106	0	5	Ccna2
Hist1h1d.2	0	1.29891	0.947	0.367	0	5	Hist1h1d
H2afz.1	0	1.25262	0.999	0.949	0	5	H2afz
H2afv.2	0	1.2176	0.984	0.719	0	5	H2afv
Tmpo.1	0	1.21738	0.989	0.586	0	5	Tmpo
Tuba1c.2	0	1.20533	0.932	0.41	0	5	Tuba1c
Ube2s.2	0	1.19139	0.996	0.776	0	5	Ube2s
Hist2h2ac.2	0	1.18891	0.868	0.256	0	5	Hist2h2ac
Esco2.2	0	1.15992	0.849	0.054	0	5	Esco2
Smc4.2	0	1.15764	0.997	0.684	0	5	Smc4
Knl1.2	0	1.12737	0.853	0.104	0	5	Knl1
Aurkb.2	0	1.09817	0.884	0.104	0	5	Aurkb
Cks2.2	0	1.0957	0.949	0.438	0	5	Cks2
Tyms.1	0	1.08024	0.904	0.35	0	5	Tyms
Tk1.2	0	1.05967	0.924	0.3	0	5	Tk1
Tpx2.2	0	1.05618	0.856	0.134	0	5	Tpx2
Hist1h3f.2	0	1.03607	0.792	0.14	0	5	Hist1h3f
Hmgb1.1	0	1.03055	1	0.974	0	5	Hmgb1
Ptma.2	0	1.02608	1	0.996	0	5	Ptma
Fbxo5.2	0	1.02111	0.836	0.097	0	5	Fbxo5
Asf1b.1	0	1.0049	0.881	0.176	0	5	Asf1b
Hmmr.2	0	1.00464	0.784	0.093	0	5	Hmmr
Ccdc34.2	0	1.0016	0.91	0.267	0	5	Ccdc34
Cdca3.2	0	1.00155	0.83	0.115	0	5	Cdca3
Hist1h2bj.1	0	0.988915	0.787	0.122	0	5	Hist1h2bj
Lmnb1.1	0	0.979494	0.961	0.47	0	5	Lmnb1
Kif11.2	0	0.97613	0.804	0.099	0	5	Kif11
Hmgn2.1	0	0.960888	0.969	0.56	0	5	Hmgn2
Dek.1	0	0.960677	0.998	0.841	0	5	Dek
Pttg1.2	0	0.952398	0.91	0.389	0	5	Pttg1
Spc25.1	0	0.94898	0.804	0.085	0	5	Spc25
Ezh2.1	0	0.938037	0.952	0.455	0	5	Ezh2
Dut.2	0	0.923338	0.995	0.749	0	5	Dut
Clspn.1	0	0.911799	0.827	0.202	0	5	Clspn
Hist1h3i.2	0	0.889009	0.757	0.095	0	5	Hist1h3i
Hist1h2be.2	0	0.888618	0.79	0.211	0	5	Hist1h2be
Hist1h2af.2	0	0.885806	0.71	0.034	0	5	Hist1h2af
Ccnb2.2	0	0.882484	0.816	0.161	0	5	Ccnb2
Rrm1.1	0	0.882367	0.89	0.318	0	5	Rrm1
Hist2h2bb.2	0	0.882172	0.78	0.163	0	5	Hist2h2bb
Incenp.2	0	0.867686	0.823	0.191	0	5	Incenp
Kif15.2	0	0.864074	0.876	0.303	0	5	Kif15
Nucks1.1	0	0.86176	0.99	0.747	0	5	Nucks1
Gmnn.2	0	0.850181	0.958	0.456	0	5	Gmnn
Cenpe.2	0	0.847701	0.743	0.141	0	5	Cenpe
Hjurp.2	0	0.843675	0.83	0.233	0	5	Hjurp
Cenpw.1	0	0.842226	0.927	0.407	0	5	Cenpw
Racgap1.2	0	0.840445	0.839	0.238	0	5	Racgap1
Lockd.2	0	0.836276	0.829	0.269	0	5	Lockd
Tacc3.2	0	0.833684	0.804	0.145	0	5	Tacc3
Anp32b.1	0	0.826625	0.999	0.917	0	5	Anp32b
Lig1.2	0	0.810755	0.909	0.397	0	5	Lig1
Shcbp1.1	0	0.80969	0.754	0.068	0	5	Shcbp1
Hist1h2bl.1	0	0.803683	0.667	0.056	0	5	Hist1h2bl
Ran.2	0	0.800256	0.998	0.916	0	5	Ran
Anp32e.1	0	0.787339	0.965	0.584	0	5	Anp32e
Ncapd3.1	0	0.78242	0.853	0.266	0	5	Ncapd3
Kif23.2	0	0.776145	0.712	0.1	0	5	Kif23
Mad2l1.1	0	0.771326	0.827	0.21	0	5	Mad2l1
Rad51ap1.1	0	0.7651	0.736	0.106	0	5	Rad51ap1
Ckap2l.2	0	0.75815	0.71	0.073	0	5	Ckap2l
Bub3.1	0	0.753599	0.939	0.595	0	5	Bub3
Ncapg2.1	0	0.751646	0.752	0.166	0	5	Ncapg2
Hist1h2bm.1	0	0.751461	0.67	0.051	0	5	Hist1h2bm
Mis18bp1.1	0	0.747769	0.681	0.077	0	5	Mis18bp1
Cmc2.1	0	0.745486	0.88	0.369	0	5	Cmc2
Alyref.2	0	0.743598	0.967	0.621	0	5	Alyref
Hist1h4h.2	0	0.737797	0.665	0.116	0	5	Hist1h4h
Rad51.1	0	0.730611	0.76	0.154	0	5	Rad51
Bub1.1	0	0.726684	0.695	0.071	0	5	Bub1
Ncapg.1	0	0.72439	0.734	0.115	0	5	Ncapg
Ndc80.1	0	0.717093	0.695	0.082	0	5	Ndc80
Hist1h1a.1	0	0.716928	0.629	0.089	0	5	Hist1h1a
Cit.1	0	0.709401	0.706	0.096	0	5	Cit
Lsm2.1	0	0.707788	0.941	0.52	0	5	Lsm2
Cenph.1	0	0.706479	0.735	0.143	0	5	Cenph
Hist1h2bb.1	0	0.699864	0.627	0.056	0	5	Hist1h2bb
Hist1h2bp.1	0	0.693501	0.638	0.079	0	5	Hist1h2bp
Ncaph.1	0	0.684207	0.707	0.093	0	5	Ncaph
Sgo1.1	0	0.681933	0.663	0.072	0	5	Sgo1
Cep55.2	0	0.68048	0.738	0.12	0	5	Cep55
Mxd3.1	0	0.679788	0.627	0.044	0	5	Mxd3
Sgo2a.1	0	0.678961	0.613	0.063	0	5	Sgo2a
Pbk.1	0	0.678444	0.657	0.051	0	5	Pbk
Kif20b.1	0	0.678254	0.697	0.133	0	5	Kif20b
Cdc20.2	0	0.677669	0.668	0.133	0	5	Cdc20
Rfc4.2	0	0.676681	0.849	0.32	0	5	Rfc4
Kif22.1	0	0.674807	0.672	0.082	0	5	Kif22
Cenpm.1	0	0.673243	0.738	0.151	0	5	Cenpm
Ska1.1	0	0.66374	0.695	0.079	0	5	Ska1
Depdc1a.1	0	0.654879	0.658	0.077	0	5	Depdc1a
Nrm.1	0	0.643207	0.798	0.273	0	5	Nrm
Rfc5.2	0	0.64075	0.821	0.311	0	5	Rfc5
Cdca5.1	0	0.632552	0.653	0.053	0	5	Cdca5
Aspm.2	0	0.626636	0.579	0.074	0	5	Aspm
Kif4.1	0	0.621567	0.618	0.066	0	5	Kif4
Pmf1.1	0	0.621538	0.813	0.286	0	5	Pmf1
Plk4.1	0	0.62118	0.754	0.216	0	5	Plk4
Diaph3.1	0	0.606261	0.632	0.103	0	5	Diaph3
Cenpk.1	0	0.602991	0.7	0.151	0	5	Cenpk
Dbf4.1	0	0.60216	0.791	0.297	0	5	Dbf4
Uhrf1.1	0	0.600629	0.723	0.222	0	5	Uhrf1
Plk1.1	0	0.59804	0.592	0.053	0	5	Plk1
Nuf2.1	0	0.59289	0.618	0.059	0	5	Nuf2
Arhgap11a.1	0	0.585285	0.616	0.107	0	5	Arhgap11a
Neil3	0	0.573615	0.561	0.043	0	5	Neil3
Ube2t.1	0	0.572339	0.714	0.174	0	5	Ube2t
Hist1h2ak	0	0.571566	0.562	0.049	0	5	Hist1h2ak
Cdc45.1	0	0.571416	0.675	0.13	0	5	Cdc45
Knstrn.2	0	0.566469	0.687	0.189	0	5	Knstrn
Ncapd2.1	0	0.562935	0.647	0.119	0	5	Ncapd2
Bub1b.1	0	0.560377	0.609	0.086	0	5	Bub1b
Pimreg.1	0	0.554407	0.535	0.054	0	5	Pimreg
Hist1h2bg	0	0.538932	0.555	0.085	0	5	Hist1h2bg
Hist1h2bk	0	0.53587	0.504	0.045	0	5	Hist1h2bk
Kpna2.1	0	0.532652	0.568	0.128	0	5	Kpna2
Hist1h2bn	0	0.52892	0.524	0.045	0	5	Hist1h2bn
Pola1.1	0	0.527093	0.695	0.219	0	5	Pola1
Dlgap5.1	0	0.526907	0.646	0.15	0	5	Dlgap5
Cdca2	0	0.51929	0.584	0.083	0	5	Cdca2
Tcf19.1	0	0.517308	0.578	0.122	0	5	Tcf19
Hist1h3b	0	0.514022	0.516	0.019	0	5	Hist1h3b
Cdkn2c	0	0.512566	0.606	0.157	0	5	Cdkn2c
Tubg1.1	0	0.503624	0.698	0.22	0	5	Tubg1
Trip13.1	0	0.495596	0.582	0.087	0	5	Trip13
Cenpp	0	0.492907	0.572	0.071	0	5	Cenpp
Cenpl	0	0.468473	0.572	0.098	0	5	Cenpl
Cdkn3.2	0	0.464852	0.537	0.107	0	5	Cdkn3
E2f8	0	0.444902	0.475	0.03	0	5	E2f8
Sapcd2	0	0.441701	0.478	0.048	0	5	Sapcd2
Hist1h2ag	0	0.441678	0.462	0.058	0	5	Hist1h2ag
Ccnb1.1	0	0.440959	0.503	0.101	0	5	Ccnb1
Brca1	0	0.437554	0.493	0.077	0	5	Brca1
Ckap2.1	0	0.428519	0.502	0.088	0	5	Ckap2
Ska2	0	0.421057	0.538	0.125	0	5	Ska2
Ttk	0	0.405317	0.465	0.033	0	5	Ttk
Aurka	0	0.40434	0.428	0.046	0	5	Aurka
Foxm1	0	0.395939	0.452	0.04	0	5	Foxm1
Lrr1	0	0.389495	0.451	0.045	0	5	Lrr1
Spag5	0	0.383774	0.434	0.049	0	5	Spag5
Hist2h2aa1	0	0.375483	0.446	0.075	0	5	Hist2h2aa1
Brip1	0	0.3613	0.443	0.06	0	5	Brip1
Melk	0	0.358655	0.416	0.043	0	5	Melk
Kifc1	0	0.356649	0.443	0.051	0	5	Kifc1
Kif2c	0	0.356129	0.406	0.042	0	5	Kif2c
C330027C09Rik	0	0.354571	0.466	0.083	0	5	C330027C09Rik
Kif20a	0	0.345555	0.41	0.051	0	5	Kif20a
Spdl1	0	0.344844	0.429	0.052	0	5	Spdl1
Hist1h2bh	0	0.343571	0.418	0.048	0	5	Hist1h2bh
Ect2	0	0.319925	0.397	0.053	0	5	Ect2
Rad54l	0	0.31499	0.414	0.066	0	5	Rad54l
Cenpn	0	0.301812	0.376	0.041	0	5	Cenpn
Zwilch	0	0.296674	0.366	0.047	0	5	Zwilch
Hist1h3g	0	0.291962	0.318	0.027	0	5	Hist1h3g
Poc1a	0	0.288193	0.396	0.051	0	5	Poc1a
Mastl	0	0.282438	0.35	0.041	0	5	Mastl
Espl1	0	0.270448	0.329	0.023	0	5	Espl1
Gen1	0	0.253817	0.328	0.035	0	5	Gen1
Hmgb3.1	7.08e-308	0.599148	0.792	0.295	8.28e-304	5	Hmgb3
Hist1h3a.1	1.17e-302	0.54633	0.672	0.208	1.37e-298	5	Hist1h3a
Snrpe.1	1.8e-302	0.571208	0.996	0.947	2.1e-298	5	Snrpe
Anln	2.78e-298	0.262342	0.311	0.034	3.26e-294	5	Anln
Nek2	7.41e-298	0.301309	0.342	0.044	8.67e-294	5	Nek2
Bard1	5.41e-297	0.385432	0.527	0.125	6.32e-293	5	Bard1
Mcm10	1.52e-295	0.316376	0.422	0.076	1.78e-291	5	Mcm10
Calm2.1	1.75e-293	0.742717	0.994	0.879	2.05e-289	5	Calm2
Cenpa.2	4.94e-293	0.938481	0.943	0.567	5.78e-289	5	Cenpa
Selenoh.1	3.77e-291	0.690543	0.985	0.701	4.41e-287	5	Selenoh
Kif14	1.41e-290	0.250007	0.298	0.032	1.65e-286	5	Kif14
Mcm7.2	1.11e-288	0.660305	0.884	0.381	1.3e-284	5	Mcm7
Haus4.1	8.23e-288	0.472262	0.698	0.232	9.63e-284	5	Haus4
Prim1.2	1.15e-282	0.579606	0.802	0.322	1.35e-278	5	Prim1
Lsm3.1	4.02e-282	0.634141	0.925	0.507	4.71e-278	5	Lsm3
Dhfr.2	1.65e-280	0.544117	0.692	0.236	1.94e-276	5	Dhfr
Fen1.2	7.63e-279	0.540352	0.785	0.306	8.92e-275	5	Fen1
Prr11	1.54e-276	0.255641	0.294	0.033	1.8e-272	5	Prr11
Dctpp1.2	1.81e-276	0.701159	0.879	0.455	2.12e-272	5	Dctpp1
4930579G24Rik	9.5e-273	0.302574	0.44	0.091	1.11e-268	5	4930579G24Rik
Bora	2.06e-268	0.363431	0.515	0.127	2.42e-264	5	Bora
Rad21.2	3.96e-267	0.67459	0.873	0.437	4.63e-263	5	Rad21
Hint1.2	1.18e-265	0.53981	0.998	0.955	1.38e-261	5	Hint1
Atad5.1	1.11e-259	0.424079	0.551	0.153	1.3e-255	5	Atad5
Usp1.1	1.13e-259	0.630669	0.909	0.486	1.32e-255	5	Usp1
Tbc1d31	1.85e-257	0.26147	0.335	0.052	2.16e-253	5	Tbc1d31
Kif18a	5.6e-257	0.327965	0.445	0.097	6.55e-253	5	Kif18a
Cenps.2	1.72e-256	0.432487	0.664	0.225	2.02e-252	5	Cenps
Mthfd2.1	6.22e-254	0.708896	0.849	0.424	7.27e-250	5	Mthfd2
Dnajc9.2	2.48e-253	0.674175	0.978	0.726	2.9e-249	5	Dnajc9
Ppia.2	1.68e-251	0.502005	1	0.997	1.97e-247	5	Ppia
Rangap1.1	2.77e-251	0.541276	0.824	0.371	3.24e-247	5	Rangap1
Rpa3.2	4.34e-249	0.623969	0.91	0.521	5.07e-245	5	Rpa3
Orc6.2	1.21e-247	0.539972	0.789	0.334	1.41e-243	5	Orc6
Ckap5.1	2.16e-244	0.480926	0.661	0.234	2.53e-240	5	Ckap5
Blm	3.3e-243	0.316496	0.468	0.115	3.86e-239	5	Blm
Ttf2	3.72e-243	0.293208	0.408	0.086	4.35e-239	5	Ttf2
Nsd2.1	7.12e-243	0.630326	0.867	0.447	8.33e-239	5	Nsd2
Hist1h2ac	2.58e-242	0.268367	0.3	0.043	3.02e-238	5	Hist1h2ac
Smc1a.1	3.99e-241	0.689326	0.948	0.623	4.67e-237	5	Smc1a
Mis18a	1.52e-239	0.35276	0.604	0.187	1.78e-235	5	Mis18a
Rps27.1	3.55e-239	-0.716963	1	0.999	4.15e-235	5	Rps27
Cbx3.1	1.89e-238	0.598275	0.993	0.837	2.21e-234	5	Cbx3
Arl6ip1.1	8.03e-233	0.853724	0.997	0.924	9.39e-229	5	Arl6ip1
Cbx5.2	3.85e-231	0.543406	0.866	0.426	4.51e-227	5	Cbx5
Suv39h1	8.76e-231	0.306283	0.482	0.128	1.02e-226	5	Suv39h1
Snrpd1.2	9.38e-231	0.617789	0.987	0.787	1.1e-226	5	Snrpd1
Rad18	2.94e-230	0.315039	0.492	0.133	3.44e-226	5	Rad18
Cdc25b	5.53e-230	0.327851	0.402	0.087	6.47e-226	5	Cdc25b
Banf1.2	8.07e-230	0.602741	0.962	0.672	9.44e-226	5	Banf1
Hist1h4c	2.35e-229	0.331103	0.455	0.112	2.75e-225	5	Hist1h4c
Hirip3.1	1.05e-228	0.42124	0.611	0.208	1.23e-224	5	Hirip3
Dck.1	1.81e-228	0.382686	0.562	0.176	2.11e-224	5	Dck
Gm42047.1	8.37e-221	0.687919	0.657	0.263	9.79e-217	5	Gm42047
Hist1h2bc	1.46e-220	0.385591	0.494	0.137	1.71e-216	5	Hist1h2bc
Cenpc1	5.7e-220	0.350887	0.543	0.167	6.66e-216	5	Cenpc1
Rcc1	8.86e-220	0.334581	0.508	0.149	1.04e-215	5	Rcc1
Srsf3.2	2.62e-216	0.556274	0.996	0.916	3.06e-212	5	Srsf3
Tipin.2	1.83e-215	0.600168	0.889	0.483	2.15e-211	5	Tipin
Nap1l1.1	6.89e-215	0.582502	0.996	0.874	8.06e-211	5	Nap1l1
Reep4.1	5.9e-214	0.376058	0.568	0.183	6.9e-210	5	Reep4
Sass6	7.43e-214	0.27174	0.422	0.104	8.69e-210	5	Sass6
Brca2	1.37e-213	0.315186	0.454	0.121	1.6e-209	5	Brca2
Hist1h4a	3.63e-211	0.275853	0.374	0.083	4.25e-207	5	Hist1h4a
Mcm5.2	1.45e-209	0.523718	0.875	0.419	1.69e-205	5	Mcm5
Hdgf.1	3.55e-209	0.562455	0.965	0.65	4.15e-205	5	Hdgf
Pole	3.41e-208	0.296169	0.466	0.13	3.98e-204	5	Pole
Csrp1.1	8.54e-208	0.484127	0.825	0.403	9.99e-204	5	Csrp1
Fignl1	1.09e-207	0.296801	0.453	0.125	1.27e-203	5	Fignl1
Ybx1.2	5.92e-207	0.517508	0.997	0.965	6.92e-203	5	Ybx1
Psmc3ip.1	6.88e-207	0.334716	0.508	0.155	8.04e-203	5	Psmc3ip
Hat1.2	6.75e-204	0.488386	0.796	0.386	7.89e-200	5	Hat1
Lsm5.1	1.42e-202	0.54078	0.972	0.754	1.66e-198	5	Lsm5
Siva1.2	1.1e-201	0.573498	0.908	0.535	1.29e-197	5	Siva1
Xist.1	2.2e-200	0.576483	1	0.971	2.57e-196	5	Xist
Psat1.1	2.74e-199	0.468734	0.724	0.323	3.2e-195	5	Psat1
Impdh2.2	2.35e-198	0.544231	0.915	0.55	2.75e-194	5	Impdh2
Pcna.2	2.96e-195	0.646157	0.914	0.591	3.47e-191	5	Pcna
Nxt1.1	5.19e-194	0.422663	0.776	0.361	6.07e-190	5	Nxt1
Dtymk.2	1.81e-193	0.538036	0.92	0.561	2.11e-189	5	Dtymk
Suz12.1	2.07e-193	0.541141	0.895	0.527	2.42e-189	5	Suz12
Rbbp4.1	5.73e-192	0.533539	0.958	0.687	6.7e-188	5	Rbbp4
Cep295	7.21e-192	0.327789	0.529	0.175	8.43e-188	5	Cep295
Atad2.1	1.12e-191	0.574084	0.839	0.451	1.31e-187	5	Atad2
Rfc3.2	6.69e-191	0.453879	0.767	0.346	7.82e-187	5	Rfc3
Hpf1.2	1.04e-190	0.54125	0.947	0.655	1.21e-186	5	Hpf1
Nasp.2	1.85e-189	0.559409	0.927	0.572	2.16e-185	5	Nasp
Rfc2.2	7.95e-188	0.531977	0.93	0.584	9.3e-184	5	Rfc2
Hist1h1c.1	2.25e-187	0.637461	0.947	0.634	2.64e-183	5	Hist1h1c
Eri1.1	2.59e-187	0.452247	0.808	0.406	3.03e-183	5	Eri1
Cep57	5.49e-187	0.457124	0.789	0.378	6.43e-183	5	Cep57
Rbbp8	2.33e-186	0.329302	0.569	0.201	2.72e-182	5	Rbbp8
Cmtm7	2.94e-185	0.629528	0.965	0.735	3.44e-181	5	Cmtm7
Gins2.2	1.12e-184	0.355499	0.626	0.237	1.3e-180	5	Gins2
Hnrnpab.2	7.46e-184	0.605023	0.979	0.775	8.73e-180	5	Hnrnpab
Hells.2	9.06e-182	0.5413	0.854	0.443	1.06e-177	5	Hells
Rnaseh2c.1	6.32e-181	0.509961	0.957	0.641	7.4e-177	5	Rnaseh2c
Chaf1a	5.85e-178	0.298057	0.476	0.153	6.85e-174	5	Chaf1a
Rpl17	4.83e-177	-0.315475	0.999	0.998	5.65e-173	5	Rpl17
Hmgn5.1	2.65e-176	0.469723	0.786	0.385	3.1e-172	5	Hmgn5
Ulbp1	2.39e-174	0.293772	0.421	0.123	2.79e-170	5	Ulbp1
Hist1h4i	5.49e-174	0.259806	0.434	0.126	6.43e-170	5	Hist1h4i
Ly6e.2	6.54e-174	0.676384	0.973	0.843	7.65e-170	5	Ly6e
Dscc1	6.86e-173	0.257927	0.396	0.111	8.02e-169	5	Dscc1
Ubb.1	9.61e-173	0.42227	1	0.998	1.12e-168	5	Ubb
Ctcf	5.63e-172	0.49842	0.915	0.595	6.59e-168	5	Ctcf
Jpt1.1	8.48e-172	0.518682	0.992	0.884	9.92e-168	5	Jpt1
Rbl1	3.18e-171	0.318048	0.568	0.21	3.72e-167	5	Rbl1
Dnmt1.2	2.08e-170	0.510624	0.829	0.451	2.43e-166	5	Dnmt1
Cdkn2d.2	1.33e-166	0.459276	0.686	0.306	1.56e-162	5	Cdkn2d
G2e3	2.4e-166	0.269421	0.419	0.123	2.8e-162	5	G2e3
Ddx39.1	1.34e-164	0.498891	0.915	0.588	1.57e-160	5	Ddx39
Slbp.2	2.37e-164	0.533381	0.929	0.641	2.78e-160	5	Slbp
Fzr1	3.41e-164	0.275902	0.482	0.16	3.99e-160	5	Fzr1
Cdca4	1.06e-163	0.306921	0.589	0.229	1.24e-159	5	Cdca4
Exosc8.1	5.71e-163	0.4566	0.939	0.621	6.68e-159	5	Exosc8
Rbmx2	1.77e-158	0.269202	0.536	0.196	2.07e-154	5	Rbmx2
Rfwd3	4.55e-158	0.290157	0.478	0.165	5.32e-154	5	Rfwd3
Hist3h2ba	8.27e-158	0.276424	0.318	0.078	9.67e-154	5	Hist3h2ba
Tceal9	9.16e-158	0.439688	0.849	0.48	1.07e-153	5	Tceal9
Cbx1.1	1.31e-157	0.472111	0.945	0.647	1.53e-153	5	Cbx1
Ncaph2	4.93e-157	0.341057	0.682	0.304	5.77e-153	5	Ncaph2
Dtl	3.49e-154	0.398896	0.736	0.356	4.08e-150	5	Dtl
1810037I17Rik	6.05e-154	0.495142	0.992	0.905	7.08e-150	5	1810037I17Rik
Brd8.1	3.07e-153	0.367759	0.682	0.31	3.59e-149	5	Brd8
Hspa8.2	5.18e-153	0.505376	1	0.987	6.06e-149	5	Hspa8
Nde1	2.53e-152	0.293621	0.581	0.23	2.96e-148	5	Nde1
Odf2	5.22e-152	0.26883	0.522	0.19	6.1e-148	5	Odf2
Topbp1.2	1.04e-151	0.407878	0.816	0.43	1.21e-147	5	Topbp1
Wdr76	2.9e-151	0.305714	0.559	0.223	3.39e-147	5	Wdr76
Smc3.1	1.22e-150	0.470898	0.889	0.565	1.43e-146	5	Smc3
Pih1d1	8.54e-150	0.333829	0.689	0.319	9.99e-146	5	Pih1d1
Anapc5.1	1.37e-149	0.426437	0.892	0.538	1.6e-145	5	Anapc5
Elof1	1.81e-149	0.401215	0.863	0.514	2.12e-145	5	Elof1
Mrpl18.2	4.84e-149	0.457998	0.963	0.75	5.66e-145	5	Mrpl18
Serinc3.1	1.85e-148	0.522906	0.942	0.68	2.16e-144	5	Serinc3
Sae1.1	1.62e-147	0.409048	0.881	0.534	1.89e-143	5	Sae1
Nudt21	5.35e-145	0.428664	0.956	0.708	6.26e-141	5	Nudt21
Rfc1.2	2.06e-144	0.406607	0.792	0.423	2.41e-140	5	Rfc1
Pole3	6.03e-143	0.323133	0.686	0.32	7.06e-139	5	Pole3
Actg1	1.03e-142	0.46734	1	0.997	1.2e-138	5	Actg1
Nelfe	4.93e-142	0.361548	0.724	0.355	5.77e-138	5	Nelfe
Mms22l	8.2e-142	0.258778	0.503	0.189	9.59e-138	5	Mms22l
Rbm3	1.09e-140	0.392943	0.999	0.977	1.27e-136	5	Rbm3
Fau	2.08e-140	-0.266698	1	1	2.43e-136	5	Fau
Rbbp7.2	1.32e-137	0.450899	0.91	0.598	1.55e-133	5	Rbbp7
Psip1.1	1.18e-136	0.403872	0.919	0.587	1.38e-132	5	Psip1
Gltp	7.11e-136	0.377893	0.855	0.499	8.32e-132	5	Gltp
Eif1ad	2.33e-135	0.299807	0.714	0.342	2.73e-131	5	Eif1ad
Fkbp2.1	1.19e-134	0.404041	0.915	0.562	1.39e-130	5	Fkbp2
Rpl38	1.67e-132	-0.371726	0.999	0.998	1.95e-128	5	Rpl38
Ssrp1.2	2.17e-132	0.426721	0.921	0.623	2.53e-128	5	Ssrp1
Pold3	2.79e-132	0.277356	0.598	0.259	3.26e-128	5	Pold3
Slc29a1.1	9.01e-132	0.302909	0.617	0.275	1.05e-127	5	Slc29a1
Lbr.1	6.49e-131	0.402465	0.87	0.539	7.6e-127	5	Lbr
Tpt1	4.3e-130	-0.286829	1	0.999	5.03e-126	5	Tpt1
Rpl30	5.47e-130	-0.263074	1	0.998	6.4e-126	5	Rpl30
Cenpx.1	5.63e-130	0.407498	0.936	0.667	6.58e-126	5	Cenpx
Rnaseh2b	6.14e-129	0.29111	0.646	0.299	7.18e-125	5	Rnaseh2b
Txn1.1	9.4e-128	0.395217	0.997	0.958	1.1e-123	5	Txn1
Gins4	4.22e-127	0.306592	0.697	0.34	4.94e-123	5	Gins4
Rpl9	8.17e-126	-0.253277	1	0.998	9.56e-122	5	Rpl9
Rdm1.1	9.93e-126	0.280324	0.594	0.256	1.16e-121	5	Rdm1
Prdx4	2.28e-125	0.250806	0.452	0.172	2.66e-121	5	Prdx4
Pbdc1.1	9.89e-125	0.367313	0.844	0.505	1.16e-120	5	Pbdc1
Sumo2	2.34e-124	0.365468	0.997	0.951	2.74e-120	5	Sumo2
Klrc1.2	4.47e-124	0.486084	0.969	0.821	5.22e-120	5	Klrc1
Med30	1.65e-123	0.372438	0.866	0.539	1.94e-119	5	Med30
H3f3a	6.16e-123	0.312354	0.999	0.987	7.21e-119	5	H3f3a
Ranbp1.2	2.4e-122	0.529296	0.978	0.81	2.81e-118	5	Ranbp1
Anapc15.1	1e-121	0.306459	0.697	0.346	1.18e-117	5	Anapc15
Rpl37a	5.23e-121	-0.296879	1	0.998	6.11e-117	5	Rpl37a
Ppil1.2	1.59e-118	0.325383	0.695	0.355	1.86e-114	5	Ppil1
Nsmce1	3.77e-118	0.330288	0.757	0.415	4.41e-114	5	Nsmce1
Ubald2.2	4.24e-118	0.377908	0.786	0.445	4.96e-114	5	Ubald2
Tfdp1.2	9.56e-118	0.334152	0.723	0.377	1.12e-113	5	Tfdp1
Xpo1	2.99e-117	0.294718	0.679	0.336	3.5e-113	5	Xpo1
Syce2.2	2.3e-116	0.289632	0.541	0.237	2.69e-112	5	Syce2
Faf1	4.09e-116	0.257091	0.563	0.249	4.79e-112	5	Faf1
Srsf7.2	4.21e-116	0.45557	0.941	0.668	4.93e-112	5	Srsf7
Rpl37	7.5e-116	-0.301795	1	0.999	8.77e-112	5	Rpl37
Slc25a5.2	1.49e-115	0.411027	0.992	0.928	1.75e-111	5	Slc25a5
Clic1.1	1.53e-115	0.3373	0.999	0.981	1.79e-111	5	Clic1
Shisa5.1	1.74e-115	-0.54867	0.991	0.98	2.03e-111	5	Shisa5
Cdk4.2	2.58e-115	0.407653	0.922	0.642	3.02e-111	5	Cdk4
Ilf2.1	2.83e-115	0.329204	0.793	0.458	3.31e-111	5	Ilf2
Rps21	2e-114	-0.394594	1	0.999	2.34e-110	5	Rps21
Calm3	2.29e-113	0.405714	0.983	0.824	2.67e-109	5	Calm3
Cox7a2	2.46e-112	0.335546	0.998	0.95	2.88e-108	5	Cox7a2
Gimap3.1	2.57e-112	-0.753711	0.832	0.872	3.01e-108	5	Gimap3
Ssna1	3.49e-111	0.352208	0.884	0.583	4.08e-107	5	Ssna1
Atpif1	9.7e-110	0.387531	0.975	0.78	1.14e-105	5	Atpif1
Ing1	3.09e-109	0.299973	0.731	0.39	3.61e-105	5	Ing1
Hsp90aa1.2	8.55e-109	0.464128	0.997	0.925	1e-104	5	Hsp90aa1
Kmt5a.1	1.6e-108	0.343736	0.795	0.464	1.87e-104	5	Kmt5a
Ddx39b.1	2.58e-108	0.375985	0.962	0.759	3.02e-104	5	Ddx39b
Rpl26	2.66e-108	-0.287195	0.999	0.994	3.11e-104	5	Rpl26
Hnrnpa1	4.39e-108	0.375946	0.996	0.9	5.13e-104	5	Hnrnpa1
Hspa14.1	9.96e-108	0.328825	0.842	0.521	1.17e-103	5	Hspa14
Fabp5.2	1.63e-107	0.470408	0.772	0.477	1.91e-103	5	Fabp5
Nrgn.1	2.37e-106	0.479883	0.917	0.619	2.78e-102	5	Nrgn
Ywhah	3.62e-104	0.384468	0.975	0.8	4.23e-100	5	Ywhah
Mapre1	8.34e-104	0.355327	0.939	0.716	9.76e-100	5	Mapre1
Tagln2.1	2.2e-103	0.432688	0.987	0.837	2.58e-99	5	Tagln2
Rad50.1	3.21e-103	0.301526	0.666	0.345	3.75e-99	5	Rad50
Nudt4	4.43e-103	0.266038	0.679	0.346	5.18e-99	5	Nudt4
Pcbp2	9.97e-103	0.36597	0.986	0.878	1.17e-98	5	Pcbp2
Hcst.2	1.09e-102	-0.579465	0.979	0.957	1.27e-98	5	Hcst
A430005L14Rik	1.35e-102	0.269477	0.675	0.344	1.58e-98	5	A430005L14Rik
Asns	1.44e-102	0.357028	0.394	0.162	1.69e-98	5	Asns
Phgdh.2	7.71e-102	0.380672	0.881	0.581	9.02e-98	5	Phgdh
Slc7a5	1.32e-101	0.260055	0.429	0.177	1.54e-97	5	Slc7a5
H3f3b.1	1.44e-101	0.35996	1	0.998	1.69e-97	5	H3f3b
Srsf2.2	1.92e-101	0.381423	0.992	0.845	2.25e-97	5	Srsf2
Cbfb	2.04e-100	0.305214	0.781	0.449	2.39e-96	5	Cbfb
Rpl36	2.57e-100	-0.289695	1	0.998	3.01e-96	5	Rpl36
Rps27rt.1	1.15e-99	-0.620381	0.986	0.98	1.35e-95	5	Rps27rt
Ccnd2.1	1.33e-99	-0.878045	0.535	0.67	1.55e-95	5	Ccnd2
Lsp1	2.88e-99	-0.424171	0.981	0.956	3.37e-95	5	Lsp1
Tmsb10	2.91e-99	-0.41237	1	0.998	3.4e-95	5	Tmsb10
Cinp	6.48e-99	0.251715	0.548	0.26	7.58e-95	5	Cinp
Atp5g2	6.86e-99	0.306842	0.997	0.965	8.02e-95	5	Atp5g2
Hnrnpa3.2	9.81e-99	0.390239	0.994	0.92	1.15e-94	5	Hnrnpa3
Mrpl51	2.3e-98	0.343937	0.885	0.599	2.69e-94	5	Mrpl51
Nsmce4a.1	2.39e-98	0.320101	0.882	0.58	2.79e-94	5	Nsmce4a
Cox5b	2.72e-98	0.322334	0.997	0.952	3.18e-94	5	Cox5b
Sf3b5	1.01e-97	0.341488	0.974	0.814	1.18e-93	5	Sf3b5
Rps29	5.8e-97	-0.390525	1	0.999	6.79e-93	5	Rps29
Plp2	1.76e-96	0.370754	0.902	0.635	2.06e-92	5	Plp2
Selenow	2.34e-96	-0.435552	0.98	0.959	2.74e-92	5	Selenow
Klrc2.2	6.07e-96	0.388754	0.961	0.771	7.1e-92	5	Klrc2
Bex3	7.99e-96	0.350482	0.873	0.572	9.34e-92	5	Bex3
Commd1	2.96e-95	0.317581	0.859	0.557	3.46e-91	5	Commd1
Cox8a	6.51e-95	0.252528	0.998	0.987	7.61e-91	5	Cox8a
Mcm3.2	1.74e-94	0.285736	0.799	0.428	2.04e-90	5	Mcm3
Gm42418.1	3.83e-94	-0.483433	1	1	4.47e-90	5	Gm42418
Tuba4a.1	8.83e-93	0.3073	0.776	0.456	1.03e-88	5	Tuba4a
Actn4	2.16e-92	0.319787	0.883	0.585	2.52e-88	5	Actn4
Cnih4	4.07e-92	0.260197	0.727	0.402	4.76e-88	5	Cnih4
Smchd1.1	8.8e-92	0.282946	0.945	0.693	1.03e-87	5	Smchd1
Smc6.1	1.76e-91	0.337667	0.967	0.774	2.05e-87	5	Smc6
Prelid3b.1	6.4e-91	0.296388	0.761	0.446	7.48e-87	5	Prelid3b
Tuba1a.1	8.41e-91	0.331817	0.818	0.516	9.84e-87	5	Tuba1a
U2af1.2	7.76e-90	0.35733	0.95	0.74	9.08e-86	5	U2af1
0610010K14Rik	8.5e-90	0.252286	0.604	0.313	9.94e-86	5	0610010K14Rik
Lsm8.1	1.29e-89	0.328521	0.881	0.603	1.51e-85	5	Lsm8
Nfyb	1.38e-89	0.286975	0.793	0.476	1.61e-85	5	Nfyb
Sf3b2	4.2e-89	0.340669	0.973	0.804	4.91e-85	5	Sf3b2
Snrnp25	1.21e-88	0.251028	0.704	0.389	1.42e-84	5	Snrnp25
Ubl4a	1.38e-88	0.271591	0.748	0.43	1.61e-84	5	Ubl4a
Maz	5.53e-88	0.27586	0.827	0.506	6.47e-84	5	Maz
Lsm4.1	1.61e-87	0.332764	0.958	0.762	1.89e-83	5	Lsm4
Nubp1	1.89e-87	0.296153	0.846	0.546	2.21e-83	5	Nubp1
Hnrnpdl.1	2.6e-87	0.328178	0.933	0.689	3.04e-83	5	Hnrnpdl
Txnl1	2.87e-87	0.343873	0.936	0.728	3.35e-83	5	Txnl1
Snrpg.1	3.4e-87	0.273253	0.999	0.97	3.98e-83	5	Snrpg
Nudt5.1	4.01e-87	0.318968	0.818	0.523	4.69e-83	5	Nudt5
Impa2	4.26e-87	0.271007	0.778	0.457	4.98e-83	5	Impa2
Pa2g4.2	9.54e-87	0.364257	0.907	0.636	1.12e-82	5	Pa2g4
Pbrm1	5.08e-86	0.337145	0.855	0.563	5.95e-82	5	Pbrm1
Cd52.1	7.71e-86	-0.405328	0.999	0.997	9.02e-82	5	Cd52
Nudc.2	1.4e-85	0.347225	0.919	0.689	1.63e-81	5	Nudc
Hprt.1	1.86e-85	0.344779	0.948	0.751	2.18e-81	5	Hprt
Gars	2.78e-83	0.293953	0.741	0.447	3.26e-79	5	Gars
Uchl5.1	5.59e-83	0.277339	0.764	0.461	6.54e-79	5	Uchl5
Snrpd2	5.78e-83	0.293808	0.991	0.919	6.76e-79	5	Snrpd2
Ddost	1.12e-82	0.304695	0.936	0.689	1.31e-78	5	Ddost
Rif1.2	5.15e-82	0.304815	0.755	0.465	6.02e-78	5	Rif1
Sdf2l1.2	8.92e-82	0.306857	0.833	0.536	1.04e-77	5	Sdf2l1
Hnrnpul1	1.18e-81	0.283163	0.792	0.502	1.38e-77	5	Hnrnpul1
Dpy30.1	2.45e-81	0.328669	0.898	0.638	2.86e-77	5	Dpy30
Eif1.1	2.89e-81	0.325505	1	0.997	3.38e-77	5	Eif1
Stub1	2.93e-81	0.262922	0.77	0.462	3.42e-77	5	Stub1
Supt16.2	3.2e-81	0.331725	0.878	0.606	3.74e-77	5	Supt16
Uba2	5.71e-81	0.276871	0.824	0.525	6.68e-77	5	Uba2
Mrpl13	9.74e-81	0.289897	0.843	0.563	1.14e-76	5	Mrpl13
Ltb.1	1.6e-80	-0.525156	0.973	0.972	1.87e-76	5	Ltb
Ptpn18	1.6e-80	-0.311905	0.995	0.987	1.88e-76	5	Ptpn18
Hsp90b1	2.36e-80	0.337294	0.996	0.91	2.76e-76	5	Hsp90b1
Mrpl28	3.52e-80	0.259425	0.701	0.41	4.11e-76	5	Mrpl28
Smarcc1	8.11e-80	0.25598	0.688	0.388	9.48e-76	5	Smarcc1
Mcm4.2	1.95e-79	0.263949	0.743	0.423	2.28e-75	5	Mcm4
Snrpb.2	2.3e-79	0.315661	0.989	0.886	2.69e-75	5	Snrpb
Kdelr2	2.83e-79	0.280796	0.833	0.533	3.31e-75	5	Kdelr2
Utp3	1.74e-78	0.255768	0.833	0.519	2.04e-74	5	Utp3
Oxct1	2.3e-78	0.291846	0.844	0.558	2.69e-74	5	Oxct1
Snrpf.2	1.14e-77	0.30848	0.988	0.895	1.33e-73	5	Snrpf
Baz1b.1	5.31e-77	0.295824	0.772	0.479	6.22e-73	5	Baz1b
Atp5o.1	1.27e-76	0.290295	0.985	0.898	1.48e-72	5	Atp5o.1
Taf1	1.3e-76	0.250916	0.642	0.354	1.53e-72	5	Taf1
Magoh.1	2.31e-76	0.295958	0.941	0.751	2.7e-72	5	Magoh
Ube2i	3.01e-75	0.281795	0.988	0.891	3.52e-71	5	Ube2i
Zfp91	3.43e-75	0.295535	0.93	0.679	4.01e-71	5	Zfp91
Dynll2	1.07e-74	0.265536	0.781	0.487	1.25e-70	5	Dynll2
Lyar.2	1.81e-74	0.316519	0.827	0.551	2.12e-70	5	Lyar
Pfdn5.2	9.3e-74	-0.335695	0.996	0.983	1.09e-69	5	Pfdn5
Gm47283.2	9.54e-74	0.365238	0.977	0.802	1.12e-69	5	Gm47283
Fundc2	2.94e-73	0.303643	0.948	0.738	3.44e-69	5	Fundc2
Minos1	6.99e-73	0.296027	0.993	0.91	8.18e-69	5	Minos1
Eif3e.1	1.65e-72	-0.324895	0.982	0.938	1.94e-68	5	Eif3e
Hnrnpr.1	3.88e-72	0.284992	0.874	0.616	4.54e-68	5	Hnrnpr
Ptges3.2	1.32e-71	0.296624	0.912	0.668	1.54e-67	5	Ptges3
Mrpl42.2	2.46e-70	0.28698	0.918	0.667	2.88e-66	5	Mrpl42
Rpl12	5.94e-70	-0.275143	0.999	0.997	6.94e-66	5	Rpl12
Trir	2.16e-69	0.28004	0.973	0.822	2.52e-65	5	Trir
Paics.1	1.8e-68	0.288593	0.832	0.566	2.1e-64	5	Paics
Pcmt1	1.97e-68	0.252336	0.866	0.585	2.3e-64	5	Pcmt1
Ppp1cc	4.72e-68	0.274866	0.922	0.708	5.52e-64	5	Ppp1cc
Cox5a.1	5.85e-68	0.286732	0.996	0.946	6.84e-64	5	Cox5a
Rps28	2.56e-67	-0.341835	1	0.995	3e-63	5	Rps28
Raly	1.08e-66	0.280605	0.973	0.811	1.27e-62	5	Raly
Polr3k	1.12e-66	0.258438	0.835	0.565	1.31e-62	5	Polr3k
Phf5a.1	1.63e-66	0.266527	0.897	0.645	1.9e-62	5	Phf5a
Mdh1	4.08e-66	0.280605	0.964	0.813	4.78e-62	5	Mdh1
Lsm6.2	6.44e-66	0.28132	0.938	0.726	7.53e-62	5	Lsm6
Npc2.1	7.72e-66	-0.469618	0.927	0.896	9.03e-62	5	Npc2
Eloc	8.27e-66	0.283205	0.977	0.831	9.68e-62	5	Eloc
Fxyd5.1	2.98e-65	-0.279335	0.999	0.993	3.48e-61	5	Fxyd5
Hnrnpu.2	5.6e-65	0.313247	0.989	0.878	6.54e-61	5	Hnrnpu
Laptm5.2	3.53e-64	-0.369924	0.995	0.981	4.13e-60	5	Laptm5
Eif4a3	4.38e-64	0.258432	0.882	0.628	5.13e-60	5	Eif4a3
Arpp19.1	5.45e-64	0.264908	0.982	0.852	6.37e-60	5	Arpp19
Cntrl	6.53e-64	0.282201	0.904	0.667	7.63e-60	5	Cntrl
Sec11c	6.72e-64	0.275646	0.988	0.892	7.86e-60	5	Sec11c
Dazap1	6.82e-64	0.25042	0.87	0.593	7.98e-60	5	Dazap1
Nono	1.32e-63	0.262902	0.944	0.728	1.54e-59	5	Nono
Junb.1	7.52e-63	-0.81596	0.881	0.882	8.8e-59	5	Junb
Smarca5	1.17e-62	0.300112	0.942	0.749	1.37e-58	5	Smarca5
Uba52	1.1e-61	-0.421209	0.995	0.987	1.29e-57	5	Uba52
Npm1.2	1.22e-61	0.292902	0.998	0.983	1.42e-57	5	Npm1
Hnrnpd.2	2.91e-61	0.294262	0.95	0.791	3.4e-57	5	Hnrnpd
Eif4a1.2	3.72e-61	0.301408	0.995	0.925	4.35e-57	5	Eif4a1
Rbm8a	2.34e-60	0.259203	0.935	0.731	2.74e-56	5	Rbm8a
Srrm1	2.38e-60	0.261218	0.962	0.792	2.78e-56	5	Srrm1
Casp3	2.96e-60	0.285711	0.953	0.73	3.46e-56	5	Casp3
Cyc1	9.32e-60	0.258749	0.867	0.628	1.09e-55	5	Cyc1
Hopx.1	1.43e-59	-0.599934	0.28	0.429	1.67e-55	5	Hopx
S100a6.1	1.45e-59	-0.744742	0.935	0.891	1.7e-55	5	S100a6
Ndufc2	1.68e-58	0.261944	0.964	0.789	1.97e-54	5	Ndufc2
Eif1ax.1	2.27e-58	0.26588	0.928	0.718	2.66e-54	5	Eif1ax
S100a13	2.95e-58	-0.335966	0.973	0.925	3.46e-54	5	S100a13
Cox7a2l.2	5.19e-58	-0.344307	0.976	0.948	6.08e-54	5	Cox7a2l
Cisd1.1	1.82e-57	0.260045	0.814	0.549	2.13e-53	5	Cisd1
Ssb.1	2.61e-57	0.258018	0.982	0.86	3.05e-53	5	Ssb
Rps27l.1	9.44e-57	0.329987	0.971	0.824	1.1e-52	5	Rps27l
Set.2	2.33e-56	0.277559	0.995	0.927	2.73e-52	5	Set
Cd3d	2.53e-56	-0.31179	0.996	0.982	2.96e-52	5	Cd3d
Tspo	2.8e-56	-0.330441	0.985	0.958	3.28e-52	5	Tspo
Gmfg.1	1.88e-55	-0.386103	0.953	0.938	2.2e-51	5	Gmfg
Arhgdib	9.83e-55	-0.280337	0.995	0.985	1.15e-50	5	Arhgdib
AY036118.1	6.89e-54	-0.426935	0.918	0.902	8.06e-50	5	AY036118
Eif3f	7.14e-54	-0.253437	0.994	0.973	8.35e-50	5	Eif3f
Ddx5	2.33e-53	-0.321437	0.999	0.993	2.72e-49	5	Ddx5
Tkt.1	1.99e-52	0.266398	0.945	0.761	2.33e-48	5	Tkt
Cycs.2	3.47e-52	0.3324	0.971	0.849	4.06e-48	5	Cycs
Gimap4.1	1.03e-51	-0.415686	0.952	0.918	1.21e-47	5	Gimap4
S100a10.1	1.09e-51	-0.405788	0.996	0.981	1.28e-47	5	S100a10
Myl6.1	2.07e-50	-0.25529	0.998	0.992	2.42e-46	5	Myl6
Rabac1.1	3.12e-48	-0.442092	0.773	0.757	3.65e-44	5	Rabac1
Cyba	6.45e-48	-0.310347	0.996	0.973	7.54e-44	5	Cyba
Snu13.2	1.72e-47	0.252586	0.965	0.823	2.02e-43	5	Snu13
Ndufab1.1	3.31e-46	0.266901	0.935	0.767	3.87e-42	5	Ndufab1
Lgals3.1	8.94e-45	-0.567927	0.91	0.821	1.05e-40	5	Lgals3
Txnip.2	1.11e-44	-0.613123	0.379	0.482	1.3e-40	5	Txnip
Lars2.1	9.29e-44	-0.46743	0.885	0.855	1.09e-39	5	Lars2
Myl12b.1	1.8e-42	-0.271404	0.992	0.968	2.1e-38	5	Myl12b
Chchd10	2.53e-42	0.299947	0.597	0.395	2.96e-38	5	Chchd10
Ly6c2.2	7.34e-42	-1.30316	0.432	0.538	8.58e-38	5	Ly6c2
Ahnak.1	7.55e-42	-0.513441	0.771	0.785	8.83e-38	5	Ahnak
Prdx1.1	1.09e-41	0.252322	0.984	0.907	1.27e-37	5	Prdx1
Psme1	1.87e-41	-0.250243	0.994	0.971	2.19e-37	5	Psme1
Ctss	4.76e-41	-0.439429	0.401	0.485	5.56e-37	5	Ctss
Tpi1.1	5.29e-41	0.272029	0.977	0.829	6.19e-37	5	Tpi1
Gimap7	2.65e-40	-0.374109	0.951	0.9	3.1e-36	5	Gimap7
Malat1.1	3.27e-40	-0.626697	1	0.999	3.82e-36	5	Malat1
Ftl1	3.15e-38	-0.277833	0.996	0.981	3.68e-34	5	Ftl1
H2-T23.1	4.32e-38	-0.333155	0.984	0.966	5.05e-34	5	H2-T23
Ogt.1	7.32e-38	-0.426803	0.664	0.671	8.56e-34	5	Ogt
Eif2s2	1.5e-37	0.2704	0.98	0.896	1.76e-33	5	Eif2s2
Pdcd4.1	4.09e-37	-0.544827	0.638	0.651	4.78e-33	5	Pdcd4
S100a11.1	8.17e-37	-0.349514	0.988	0.947	9.55e-33	5	S100a11
Gimap6.1	4.35e-35	-0.423716	0.863	0.84	5.09e-31	5	Gimap6
Ptprc.1	6.63e-35	-0.309436	0.993	0.99	7.75e-31	5	Ptprc
Itgb7.2	9.93e-35	-0.465629	0.084	0.206	1.16e-30	5	Itgb7
Slfn1.2	1.04e-34	-0.602521	0.348	0.446	1.22e-30	5	Slfn1
Fam189b	1.04e-34	-0.413232	0.31	0.41	1.22e-30	5	Fam189b
Gm8369.1	6.1e-34	-0.533186	0.738	0.727	7.13e-30	5	Gm8369
Mndal.1	8.21e-34	-0.436886	0.938	0.896	9.6e-30	5	Mndal
Ms4a4b.1	9.15e-34	-0.326921	0.997	0.993	1.07e-29	5	Ms4a4b
Emb.2	1.37e-33	-0.715833	0.129	0.25	1.6e-29	5	Emb
Sp100.1	1.68e-33	-0.394241	0.889	0.856	1.97e-29	5	Sp100
Cxcr3.2	1.17e-32	-0.501587	0.093	0.209	1.36e-28	5	Cxcr3
Samhd1.2	1.48e-32	-0.633064	0.575	0.594	1.73e-28	5	Samhd1
Kbtbd11.1	3.04e-32	-0.323096	0.054	0.161	3.55e-28	5	Kbtbd11
Slfn5.2	3.47e-32	-0.432363	0.018	0.11	4.06e-28	5	Slfn5
Tcf7.1	6.38e-32	-0.343291	0.044	0.15	7.46e-28	5	Tcf7
Cd8b1.1	6.71e-32	-0.288545	0.992	0.971	7.84e-28	5	Cd8b1
Msn	1.82e-31	-0.294608	0.956	0.911	2.13e-27	5	Msn
Arl6ip5	4.12e-31	-0.303605	0.803	0.749	4.82e-27	5	Arl6ip5
Mt1	6.95e-31	0.297648	0.35	0.209	8.13e-27	5	Mt1
Kdm7a	1.17e-30	-0.291558	0.096	0.204	1.37e-26	5	Kdm7a
Rsrp1.1	1.2e-30	-0.385527	0.894	0.855	1.4e-26	5	Rsrp1
Srsf5.1	1.25e-30	-0.296352	0.972	0.942	1.46e-26	5	Srsf5
Bcl2	2.11e-30	-0.510349	0.832	0.803	2.47e-26	5	Bcl2
Btg1.1	2.34e-30	-0.437109	0.984	0.98	2.74e-26	5	Btg1
Zdhhc18.1	6.47e-30	-0.379042	0.785	0.747	7.57e-26	5	Zdhhc18
Psmb10	6.87e-29	-0.288756	0.923	0.864	8.03e-25	5	Psmb10
Mbnl1	1.48e-28	-0.272351	0.993	0.978	1.73e-24	5	Mbnl1
Prr13.2	3.05e-28	-0.32274	0.855	0.795	3.56e-24	5	Prr13
Klk8	8.3e-28	-0.406902	0.583	0.595	9.71e-24	5	Klk8
Ms4a6b.1	9.39e-28	-0.312043	0.995	0.98	1.1e-23	5	Ms4a6b
Ifi27l2a.1	2.07e-27	-0.582706	0.873	0.871	2.42e-23	5	Ifi27l2a
Ly6c1.2	2.72e-27	-0.632129	0.224	0.33	3.18e-23	5	Ly6c1
Slamf6.2	3.35e-27	-0.356774	0.055	0.15	3.92e-23	5	Slamf6
Vasp.1	2.36e-26	-0.25119	0.954	0.899	2.76e-22	5	Vasp
Ccl5.2	9.71e-26	-1.46815	0.774	0.764	1.14e-21	5	Ccl5
Gimap5.1	1.96e-25	-0.337611	0.804	0.77	2.29e-21	5	Gimap5
Map1lc3b.1	2.58e-25	-0.272046	0.929	0.866	3.02e-21	5	Map1lc3b
Il2rg.1	1.38e-24	-0.323987	0.858	0.806	1.62e-20	5	Il2rg
Ifi214.1	1.43e-24	-0.470004	0.369	0.445	1.67e-20	5	Ifi214
Ifi203.1	1.45e-24	-0.426205	0.912	0.861	1.7e-20	5	Ifi203
Cd37.1	2.45e-24	-0.288281	0.885	0.816	2.86e-20	5	Cd37
Traf3ip3	1.63e-23	-0.315372	0.693	0.653	1.91e-19	5	Traf3ip3
Ripor2	1.83e-23	-0.272306	0.059	0.145	2.14e-19	5	Ripor2
Gpsm3.1	2.22e-23	-0.268489	0.89	0.821	2.6e-19	5	Gpsm3
Btg2.1	1.12e-22	-0.526291	0.792	0.753	1.32e-18	5	Btg2
Slco3a1.1	4.26e-22	-0.281695	0.058	0.14	4.98e-18	5	Slco3a1
Ets1.1	1.45e-21	-0.297259	0.955	0.903	1.7e-17	5	Ets1
Epsti1.1	1.61e-21	-0.358853	0.793	0.732	1.88e-17	5	Epsti1
Gbp4.1	1.64e-21	-0.387218	0.789	0.724	1.92e-17	5	Gbp4
Lef1.1	2.75e-21	-0.30606	0.064	0.146	3.22e-17	5	Lef1
Sell.1	3.8e-21	-0.327885	0.04	0.117	4.45e-17	5	Sell
Mxd4.1	3.82e-21	-0.36401	0.303	0.368	4.47e-17	5	Mxd4
Ifit1.2	5.21e-21	-0.397791	0.066	0.149	6.1e-17	5	Ifit1
Pld3.2	7.89e-21	-0.329553	0.637	0.61	9.23e-17	5	Pld3
Capg.1	1.22e-20	-0.358668	0.878	0.785	1.43e-16	5	Capg
Gm20186.2	1.53e-20	-0.429976	0.13	0.214	1.79e-16	5	Gm20186
Klf2.2	2.31e-20	-1.08827	0.427	0.465	2.7e-16	5	Klf2
Ablim1.1	3.37e-20	-0.381541	0.74	0.693	3.94e-16	5	Ablim1
Tbc1d10c	5.63e-20	-0.268833	0.849	0.776	6.58e-16	5	Tbc1d10c
Borcs8	1.25e-19	-0.287197	0.724	0.674	1.46e-15	5	Borcs8
Bst2.1	3.05e-19	-0.457174	0.755	0.72	3.56e-15	5	Bst2
Runx3	7.54e-19	-0.303904	0.906	0.845	8.82e-15	5	Runx3
Slfn2.2	2.76e-18	-0.476224	0.807	0.753	3.23e-14	5	Slfn2
Cnp	6.78e-18	-0.302531	0.662	0.626	7.93e-14	5	Cnp
S100a4.1	8.4e-18	-0.303216	0.972	0.865	9.83e-14	5	S100a4
Tprgl	6.39e-17	-0.290416	0.632	0.589	7.48e-13	5	Tprgl
Ifit3.2	7.42e-17	-0.443834	0.078	0.15	8.68e-13	5	Ifit3
Ly6a.1	8.95e-17	-0.845107	0.326	0.394	1.05e-12	5	Ly6a
Gm2682.1	1.06e-16	-0.261858	0.078	0.149	1.24e-12	5	Gm2682
Zfp36l2.2	3.23e-16	-0.463254	0.779	0.731	3.78e-12	5	Zfp36l2
Pmepa1.2	3.25e-16	-0.301836	0.053	0.119	3.8e-12	5	Pmepa1
Ccr7.1	4.09e-16	-0.270194	0.056	0.121	4.78e-12	5	Ccr7
Txk	4.86e-16	-0.428476	0.701	0.649	5.69e-12	5	Txk
Vsir.1	9.8e-16	-0.299049	0.485	0.49	1.15e-11	5	Vsir
Ctla2a.2	1.35e-15	-0.555125	0.853	0.782	1.58e-11	5	Ctla2a
Cxcr6.1	2.67e-15	-0.336041	0.938	0.833	3.12e-11	5	Cxcr6
Ms4a4c.1	3.4e-15	-0.453337	0.156	0.227	3.98e-11	5	Ms4a4c
Glipr2	1.63e-14	-0.294932	0.592	0.575	1.9e-10	5	Glipr2
Prex1.1	1.93e-14	-0.306099	0.471	0.48	2.26e-10	5	Prex1
Dusp2.2	2.62e-14	-0.417123	0.823	0.773	3.06e-10	5	Dusp2
Cd7	4.13e-14	-0.295437	0.161	0.228	4.83e-10	5	Cd7
Gramd3.2	5.43e-14	-0.369672	0.2	0.26	6.35e-10	5	Gramd3
Cd53.1	9.21e-14	-0.296791	0.909	0.843	1.08e-09	5	Cd53
Smpdl3a.1	1.36e-13	-0.292075	0.359	0.39	1.6e-09	5	Smpdl3a
Il7r.2	1.61e-13	-0.512174	0.228	0.289	1.88e-09	5	Il7r
Anxa5	1.98e-13	-0.259396	0.655	0.611	2.31e-09	5	Anxa5
Cd160	3.52e-13	-0.38777	0.463	0.481	4.12e-09	5	Cd160
Fam53b	5.16e-13	-0.286141	0.229	0.283	6.03e-09	5	Fam53b
Rhoh.1	1.31e-12	-0.326781	0.852	0.788	1.54e-08	5	Rhoh
Sp110	1.41e-12	-0.271835	0.795	0.722	1.65e-08	5	Sp110
Arhgap45.1	1.77e-12	-0.291977	0.652	0.604	2.07e-08	5	Arhgap45
Cd2.1	3.88e-12	-0.267402	0.858	0.813	4.54e-08	5	Cd2
Apbb1ip	9.32e-12	-0.282354	0.634	0.585	1.09e-07	5	Apbb1ip
Acp5	1.52e-11	-0.317105	0.33	0.36	1.77e-07	5	Acp5
Pnrc1.1	2.01e-11	-0.287547	0.897	0.823	2.35e-07	5	Pnrc1
Ier2.1	2.56e-11	-0.327736	0.83	0.756	3e-07	5	Ier2
Neurl3	7.82e-11	-0.272064	0.262	0.305	9.14e-07	5	Neurl3
Zcchc7	8.34e-11	-0.256772	0.696	0.624	9.75e-07	5	Zcchc7
Stat1	3.62e-10	-0.354891	0.857	0.782	4.24e-06	5	Stat1
Ifi209.1	4.47e-10	-0.329365	0.435	0.446	5.22e-06	5	Ifi209
Rtp4.2	4.86e-10	-0.338488	0.29	0.331	5.68e-06	5	Rtp4
Dapl1.1	5.58e-10	-0.388887	0.061	0.11	6.52e-06	5	Dapl1
Zfp36.1	1.42e-09	-0.423985	0.403	0.407	1.66e-05	5	Zfp36
Cd82.1	1.71e-09	-0.285608	0.639	0.584	2e-05	5	Cd82
Dgka	2.41e-09	-0.265435	0.267	0.3	2.82e-05	5	Dgka
Tespa1.2	3.9e-09	-0.257058	0.167	0.214	4.56e-05	5	Tespa1
Ier5.1	4.76e-09	-0.336247	0.72	0.653	5.57e-05	5	Ier5
Evl	5.82e-09	-0.270111	0.638	0.587	6.81e-05	5	Evl
Smad7.1	7.8e-09	-0.364727	0.498	0.476	9.13e-05	5	Smad7
Ifi206	8.38e-09	-0.252461	0.188	0.235	9.8e-05	5	Ifi206
Samd9l.1	1.2e-08	-0.349676	0.498	0.479	0.000140674	5	Samd9l
Ifi208	2.14e-08	-0.305964	0.299	0.326	0.000250714	5	Ifi208
Ccl3.1	2.34e-08	-0.268002	0.62	0.483	0.0002735	5	Ccl3
Fos.2	2.76e-08	-0.714902	0.435	0.43	0.000322529	5	Fos
Irf7.2	4.33e-08	-0.370271	0.395	0.405	0.00050662	5	Irf7
Gbp2b.2	5.74e-08	-0.284473	0.166	0.207	0.00067164	5	Gbp2b
Ifi47.1	6.36e-08	-0.302312	0.75	0.671	0.000743773	5	Ifi47
Gm26917.1	7.93e-08	-0.34686	0.809	0.738	0.000927126	5	Gm26917
Gimap8	1.17e-07	-0.266285	0.561	0.515	0.00136594	5	Gimap8
Clk1.1	2.8e-07	-0.290047	0.785	0.697	0.00328056	5	Clk1
Sat1.1	3.71e-07	-0.374267	0.717	0.637	0.00434092	5	Sat1
Jun.1	1.44e-06	-0.447447	0.77	0.709	0.0168874	5	Jun
Ppp1r15a.1	3.02e-06	-0.312911	0.61	0.557	0.035338	5	Ppp1r15a
Stat4.1	4.16e-06	-0.259867	0.552	0.508	0.0486966	5	Stat4
Hspa1b.2	6.1e-06	-0.283038	0.412	0.323	0.0713402	5	Hspa1b
Isg15.2	6.37e-06	-0.60405	0.429	0.425	0.0745314	5	Isg15
Gbp2.1	6.84e-06	-0.264393	0.213	0.237	0.0800052	5	Gbp2
Ssh2.1	9.69e-06	-0.289642	0.216	0.239	0.113364	5	Ssh2
Tpst2	1.5e-05	-0.254045	0.433	0.407	0.174917	5	Tpst2
Gm12840.2	1.75e-05	-0.59104	0.246	0.267	0.20479	5	Gm12840
Foxp1.2	4.47e-05	-0.306826	0.445	0.416	0.523309	5	Foxp1
Ccr2.1	4.54e-05	-0.32476	0.154	0.187	0.531321	5	Ccr2
Utrn.1	5.19e-05	-0.265807	0.469	0.439	0.607234	5	Utrn
Vps37b.2	5.71e-05	-0.274204	0.836	0.754	0.667481	5	Vps37b
Bcl11b.2	0.000105116	-0.338592	0.586	0.517	1	5	Bcl11b
Tsc22d3.2	0.000114988	-0.38374	0.385	0.376	1	5	Tsc22d3
Hspa1a.2	0.00011993	-0.315589	0.305	0.24	1	5	Hspa1a
Zfp36l1.2	0.000158928	-0.313405	0.627	0.568	1	5	Zfp36l1
Zbp1.2	0.000217292	-0.295298	0.712	0.628	1	5	Zbp1
Klf6.1	0.000262292	-0.347348	0.92	0.854	1	5	Klf6
Ubc.1	0.000350534	-0.256444	0.752	0.656	1	5	Ubc
Fosb.1	0.000886109	-0.379949	0.677	0.624	1	5	Fosb
Gbp7	0.00122337	-0.272303	0.815	0.696	1	5	Gbp7
Arl4c.2	0.00123172	-0.411116	0.508	0.458	1	5	Arl4c
Isg20.1	0.00135169	-0.286414	0.354	0.343	1	5	Isg20
Cd69.2	0.00268026	-0.332577	0.755	0.679	1	5	Cd69
Prf1.2	0.00306066	-0.331358	0.923	0.796	1	5	Prf1
Ifngr1.2	0.00458879	-0.306408	0.809	0.732	1	5	Ifngr1
Gpr183.2	0.00810217	-0.315833	0.416	0.39	1	5	Gpr183
Klf2.3	0	2.36025	0.75	0.4	0	6	Klf2
Emb.3	0	1.67844	0.616	0.151	0	6	Emb
Malat1.2	0	1.30728	0.999	1	0	6	Malat1
Cxcr3.3	0	1.28569	0.513	0.123	0	6	Cxcr3
Itgb7.3	0	1.2158	0.522	0.116	0	6	Itgb7
Rps27.2	0	1.13123	0.997	0.999	0	6	Rps27
Gm42418.2	0	0.981683	0.999	1	0	6	Gm42418
Hint1.3	0	-0.812087	0.837	0.988	0	6	Hint1
Ybx1.3	0	-0.866719	0.874	0.991	0	6	Ybx1
Gapdh	0	-0.918221	0.965	0.999	0	6	Gapdh
Lag3.1	0	-0.923632	0.257	0.869	0	6	Lag3
Casp3.1	0	-0.984315	0.279	0.867	0	6	Casp3
Tox.1	0	-1.01261	0.26	0.841	0	6	Tox
Anxa2.1	0	-1.04599	0.59	0.961	0	6	Anxa2
Nap1l1.2	0	-1.10983	0.585	0.958	0	6	Nap1l1
Ptma.3	0	-1.14491	0.985	0.999	0	6	Ptma
Ran.3	0	-1.16231	0.733	0.97	0	6	Ran
Irf8.1	0	-1.2687	0.182	0.849	0	6	Irf8
Tnfrsf9.1	0	-1.2733	0.234	0.872	0	6	Tnfrsf9
Dut.3	0	-1.52348	0.357	0.879	0	6	Dut
Prf1.3	0	-1.72097	0.394	0.904	0	6	Prf1
Spp1.1	0	-1.95141	0.124	0.771	0	6	Spp1
Nrgn.2	0	-2.01529	0.094	0.787	0	6	Nrgn
Rgs16.1	1.5e-303	-1.08541	0.129	0.719	1.76e-299	6	Rgs16
Rpl28	1.89e-294	-0.519807	0.992	1	2.21e-290	6	Rpl28
Klre1.1	5.57e-293	-0.87751	0.173	0.78	6.51e-289	6	Klre1
Rps27l.2	2.31e-292	-0.953417	0.495	0.921	2.71e-288	6	Rps27l
Eno3.1	1.32e-290	-1.11584	0.083	0.618	1.54e-286	6	Eno3
H2afz.2	3.87e-284	-1.19448	0.833	0.983	4.53e-280	6	H2afz
Lat2.1	5.08e-284	-0.830315	0.118	0.685	5.95e-280	6	Lat2
Hmgb1.2	7.14e-277	-0.923044	0.902	0.994	8.35e-273	6	Hmgb1
Pglyrp1.1	4.68e-275	-0.922892	0.359	0.88	5.47e-271	6	Pglyrp1
Ppia.3	1.91e-273	-0.646118	0.986	1	2.24e-269	6	Ppia
Lgals1.1	1.54e-270	-0.911684	0.86	0.993	1.8e-266	6	Lgals1
Bcl2a1d	3.56e-269	-0.883262	0.299	0.84	4.16e-265	6	Bcl2a1d
Plek.1	5.48e-269	-0.744778	0.16	0.72	6.4e-265	6	Plek
Ms4a6b.2	1.19e-268	0.883811	0.967	0.986	1.39e-264	6	Ms4a6b
Cenpa.3	7.72e-267	-1.20298	0.188	0.722	9.03e-263	6	Cenpa
Actg1.1	5.83e-266	-0.748893	0.988	1	6.82e-262	6	Actg1
Nr4a2.1	5.38e-263	-0.854828	0.161	0.718	6.29e-259	6	Nr4a2
Rbpj.1	1.84e-260	-0.862113	0.34	0.866	2.15e-256	6	Rbpj
Stmn1.2	1.14e-257	-1.30565	0.063	0.561	1.33e-253	6	Stmn1
Pdcd1.1	2.69e-254	-0.851665	0.334	0.888	3.15e-250	6	Pdcd1
Ly6c2.3	4.18e-254	1.97771	0.768	0.47	4.89e-250	6	Ly6c2
Tpi1.2	7.45e-254	-0.925764	0.489	0.928	8.71e-250	6	Tpi1
Tcf7.2	2.82e-253	0.932364	0.381	0.081	3.3e-249	6	Tcf7
Pclaf.3	1.55e-252	-1.94949	0.052	0.532	1.81e-248	6	Pclaf
Txn1.2	7.4e-252	-0.752683	0.838	0.99	8.66e-248	6	Txn1
S1pr1.1	1.82e-251	0.750267	0.274	0.035	2.13e-247	6	S1pr1
Cox5a.2	2.07e-248	-0.714221	0.803	0.985	2.42e-244	6	Cox5a
Tk1.3	5.57e-239	-0.82444	0.022	0.486	6.51e-235	6	Tk1
Kbtbd11.2	3.71e-238	0.885735	0.386	0.094	4.34e-234	6	Kbtbd11
Slamf6.3	2.52e-237	0.966827	0.375	0.085	2.94e-233	6	Slamf6
Arsb	1.87e-236	-0.683033	0.137	0.659	2.19e-232	6	Arsb
Siva1.3	4.28e-235	-0.755753	0.183	0.683	5.01e-231	6	Siva1
Slfn5.3	5.51e-234	1.25067	0.302	0.052	6.44e-230	6	Slfn5
Arl4c.3	4.82e-232	1.31836	0.683	0.423	5.64e-228	6	Arl4c
Ybx3.1	1.23e-231	-0.760062	0.527	0.929	1.44e-227	6	Ybx3
Gimap3.2	2.73e-231	1.14081	0.879	0.862	3.19e-227	6	Gimap3
Gramd3.3	5.94e-229	1.07958	0.513	0.196	6.95e-225	6	Gramd3
Calm3.1	2.34e-227	-0.735718	0.513	0.92	2.74e-223	6	Calm3
Il2rb.1	1.18e-226	-0.850836	0.639	0.956	1.38e-222	6	Il2rb
Rbm3.1	1.25e-226	-0.650913	0.922	0.993	1.46e-222	6	Rbm3
Snrpd1.3	2.64e-226	-0.791595	0.505	0.886	3.09e-222	6	Snrpd1
Pgk1	2.94e-226	-0.827488	0.606	0.948	3.44e-222	6	Pgk1
Cks1b.2	4.72e-226	-1.13702	0.049	0.5	5.52e-222	6	Cks1b
Slco3a1.2	6.91e-226	0.858387	0.354	0.08	8.09e-222	6	Slco3a1
Snrpe.2	3.93e-225	-0.650095	0.822	0.982	4.6e-221	6	Snrpe
Havcr2.1	4.08e-224	-0.715961	0.095	0.59	4.78e-220	6	Havcr2
Tmsb10.1	1.49e-223	0.648165	0.994	0.999	1.75e-219	6	Tmsb10
Slfn1.3	4.9e-223	1.33117	0.662	0.382	5.73e-219	6	Slfn1
Acot7.1	9.31e-223	-0.65685	0.257	0.785	1.09e-218	6	Acot7
Rpl3	1.42e-222	-0.484516	0.979	1	1.66e-218	6	Rpl3
Ptpn6.1	1.67e-222	-0.737617	0.379	0.865	1.95e-218	6	Ptpn6
Atp5f1.1	1.62e-221	-0.638914	0.775	0.983	1.9e-217	6	Atp5f1
Hmgn2.2	4.31e-221	-0.96826	0.247	0.708	5.04e-217	6	Hmgn2
Ubash3b.1	6.2e-221	-0.652712	0.141	0.643	7.25e-217	6	Ubash3b
Ifngr1.3	7.55e-221	1.282	0.823	0.73	8.83e-217	6	Ifngr1
Zbtb32.1	9.72e-220	-0.652492	0.115	0.602	1.14e-215	6	Zbtb32
Rap1a.1	5.93e-219	-0.716965	0.644	0.96	6.93e-215	6	Rap1a
Samsn1.1	1.02e-218	-0.742751	0.359	0.859	1.2e-214	6	Samsn1
Pmepa1.3	1.25e-218	0.932657	0.32	0.064	1.46e-214	6	Pmepa1
Gm20186.3	1.32e-218	1.12921	0.451	0.148	1.55e-214	6	Gm20186
Ifit3.3	7.6e-218	1.31242	0.368	0.091	8.88e-214	6	Ifit3
Slfn2.3	3.52e-216	1.1806	0.835	0.747	4.12e-212	6	Slfn2
Tipin.3	4.1e-215	-0.753671	0.162	0.633	4.8e-211	6	Tipin
Ctsd.1	9.64e-215	-0.751107	0.727	0.982	1.13e-210	6	Ctsd
Anp32b.2	2.9e-213	-0.773289	0.756	0.967	3.4e-209	6	Anp32b
Btg1.2	5.46e-213	1.03531	0.979	0.981	6.38e-209	6	Btg1
Gpd2.1	1.46e-212	-0.592365	0.119	0.607	1.7e-208	6	Gpd2
Cmtm7.1	3.9e-212	-0.816964	0.402	0.85	4.57e-208	6	Cmtm7
Ldha.1	1.44e-211	-0.800674	0.82	0.982	1.68e-207	6	Ldha
Pfn1	2.49e-211	-0.524886	0.981	1	2.91e-207	6	Pfn1
Entpd1.1	5.32e-211	-0.622998	0.157	0.667	6.22e-207	6	Entpd1
Gm2682.2	2.34e-209	0.807267	0.362	0.091	2.74e-205	6	Gm2682
Ccnd2.2	1.7e-208	1.22051	0.784	0.619	1.99e-204	6	Ccnd2
Bcl2a1b.1	1.27e-207	-0.695945	0.433	0.889	1.49e-203	6	Bcl2a1b
Ranbp1.3	4.63e-207	-0.865509	0.562	0.895	5.41e-203	6	Ranbp1
Slc16a11.1	7.56e-207	-0.871604	0.029	0.455	8.84e-203	6	Slc16a11
Fcer1g.2	2.88e-206	-1.61092	0.103	0.557	3.37e-202	6	Fcer1g
Cdk6.2	2.73e-205	-0.7604	0.338	0.821	3.19e-201	6	Cdk6
Hnrnpa1.1	5.04e-205	-0.6739	0.695	0.961	5.89e-201	6	Hnrnpa1
Hsp90b1.1	1.45e-204	-0.784821	0.707	0.969	1.69e-200	6	Hsp90b1
Txnip.3	2.08e-204	1.21882	0.668	0.423	2.43e-200	6	Txnip
S100a4.2	5.26e-203	-0.918763	0.606	0.94	6.15e-199	6	S100a4
Itgav.1	2.06e-202	-0.621106	0.152	0.64	2.41e-198	6	Itgav
Tuba1b.2	3.67e-202	-1.49874	0.454	0.812	4.29e-198	6	Tuba1b
2023-09-11	4.16e-201	-0.617959	0.24	0.738	4.87e-197	6	2023-09-11
Tpt1.1	8.12e-200	0.371347	0.997	1	9.5e-196	6	Tpt1
Selenoh.2	1.27e-199	-0.820592	0.401	0.821	1.49e-195	6	Selenoh
Litaf.1	1.39e-199	-0.529531	0.1	0.572	1.63e-195	6	Litaf
Mcm5.3	3.89e-199	-0.680109	0.121	0.574	4.54e-195	6	Mcm5
Rps27rt.2	1.06e-198	0.974312	0.957	0.986	1.24e-194	6	Rps27rt
Cst7.1	3.86e-198	-0.690516	0.545	0.944	4.51e-194	6	Cst7
Lig1.3	4.33e-198	-0.79175	0.113	0.561	5.07e-194	6	Lig1
Mki67.3	2.84e-195	-1.34156	0.062	0.478	3.32e-191	6	Mki67
Cisd1.2	4.15e-195	-0.615969	0.202	0.674	4.85e-191	6	Cisd1
Tyms.2	4.36e-195	-0.747172	0.086	0.519	5.1e-191	6	Tyms
Etfb.1	7.55e-193	-0.667077	0.394	0.84	8.83e-189	6	Etfb
Ms4a4b.2	7.77e-192	0.759372	0.984	0.996	9.09e-188	6	Ms4a4b
Hist1h1b.2	3.34e-191	-1.99836	0.095	0.502	3.91e-187	6	Hist1h1b
Rps21.1	3.48e-190	0.626966	0.996	1	4.07e-186	6	Rps21
Kif15.3	3.78e-190	-0.653635	0.054	0.473	4.42e-186	6	Kif15
Stk39	5.33e-190	-0.582248	0.209	0.694	6.24e-186	6	Stk39
Ifit3b	8.17e-190	0.695728	0.209	0.026	9.56e-186	6	Ifit3b
Capg.2	2.13e-188	-0.68983	0.428	0.876	2.49e-184	6	Capg
Lmnb1.2	2.59e-188	-0.788576	0.186	0.63	3.03e-184	6	Lmnb1
[truncated: 3,034 more rows]
