# Supplementary material for: Low TCR Binding Strength Results in Increased Progenitor-like CD8+ Tumor-Infiltrating Lymphocytes
Source: Oxford University Press journal article supplement (doi:10.1158/2326-6066.cir-22-0761), 2023-02-14
Supplement: cir-22-0761_table_s7_suppst7.xlsx [file cir-22-0761_table_s7_suppst7.xlsx]

## Sheet: Cluster 0
	p_val	avg_log2FC	pct_high	pct.2_low	p_val_adj
Gm42418	3.13186e-71	-0.492708	1	1	3.66334e-67
Rps27rt	7.18719e-65	-0.474824	0.978	0.989	8.40685e-61
Rps21	1.07541e-51	-0.235582	1	1	1.2579e-47
Rps27	4.12276e-51	-0.227818	1	0.998	4.82239e-47
Rps28	2.8463e-47	-0.249258	0.999	0.996	3.32931e-43
Rpl39	3.18702e-38	-0.174776	1	0.998	3.72786e-34
Rpl37a	6.37251e-38	-0.173445	1	0.999	7.45393e-34
Rps29	1.2221e-36	-0.172869	1	1	1.42948e-32
Tpt1	1.65093e-29	-0.139485	1	1	1.93109e-25
Rpl38	1.97977e-29	-0.173401	1	0.999	2.31574e-25
Rpl37	4.30198e-27	-0.151767	1	0.999	5.03203e-23
Gm11808	1.06411e-24	-0.258695	0.971	0.984	1.24469e-20
Fcer1g	4.48748e-21	0.488822	0.743	0.58	5.24901e-17
Rpl17	1.00361e-20	-0.120101	1	1	1.17392e-16
Btg1	1.29977e-20	-0.317494	0.984	0.997	1.52034e-16
Ppia	8.67614e-20	0.179653	0.999	0.999	1.01485e-15
Uba52	2.87614e-19	-0.180286	0.991	0.991	3.36422e-15
Hist1h4d	5.86961e-19	-0.263855	0.351	0.506	6.86568e-15
Lars2	1.52464e-18	-0.276034	0.82	0.878	1.78337e-14
mt-Nd3	4.23852e-18	-0.257519	0.82	0.906	4.95779e-14
Nrgn	1.33412e-16	0.392601	0.782	0.677	1.56052e-12
Rpl13a	1.90715e-16	-0.200243	0.968	0.974	2.2308e-12
Nme1	1.53757e-15	0.266616	0.899	0.883	1.7985e-11
Rpl27	1.81866e-15	-0.119405	1	0.999	2.12728e-11
Wdr89	4.50307e-15	-0.212787	0.948	0.968	5.26724e-11
Edf1	4.89527e-15	0.184137	0.971	0.963	5.72599e-11
mt-Co3	5.14827e-15	-0.143287	1	1	6.02194e-11
Rpl10-ps3	1.75273e-14	-0.225227	0.855	0.911	2.05017e-10
Eif5a	3.35682e-14	0.248766	0.964	0.957	3.92647e-10
H2-Q7	1.72485e-13	-0.205815	0.881	0.922	2.01756e-09
Rps15	1.74414e-13	-0.148961	1	0.999	2.04013e-09
Ldha	3.0799e-13	0.235243	0.979	0.956	3.60256e-09
Rpl23a	3.67219e-13	-0.150723	0.998	0.998	4.29536e-09
Pdcd4	4.50619e-13	-0.263558	0.581	0.694	5.27088e-09
Trac	5.95707e-13	-0.192951	0.966	0.995	6.96799e-09
Prf1	6.65853e-13	0.316626	0.973	0.965	7.78848e-09
Rplp2	1.76054e-12	-0.0872324	1	1	2.05931e-08
Actg1	2.14199e-12	0.156127	1	1	2.50549e-08
Ybx1	3.49585e-12	0.174169	0.984	0.978	4.08909e-08
Hint1	3.88936e-12	0.17115	0.982	0.975	4.54938e-08
Ptma	4.71996e-12	0.178202	0.997	0.999	5.52094e-08
Rpl34	8.97209e-12	-0.0814163	0.999	0.998	1.04947e-07
Vps37b	5.69217e-11	-0.254027	0.799	0.853	6.65813e-07
Arhgef1	1.32006e-10	-0.188561	0.706	0.79	1.54407e-06
Rps4x	1.70272e-10	0.0951445	1	1	1.99168e-06
Ifng	1.71944e-10	0.40515	0.904	0.873	2.01123e-06
Rpl15	1.93744e-10	0.105004	1	1	2.26622e-06
Fgl2	3.09858e-10	-0.260625	0.702	0.777	3.62441e-06
Hcst	3.92816e-10	-0.182062	0.982	0.985	4.59477e-06
Cox5a	4.04462e-10	0.162757	0.975	0.974	4.73099e-06
Rps2	5.87177e-10	0.133587	0.999	0.999	6.86821e-06
Hsp90ab1	8.61263e-10	0.13544	0.998	0.999	1.00742e-05
Ndufa4	1.3423e-09	0.194089	0.935	0.937	1.57008e-05
mt-Nd1	1.3663e-09	-0.1537	0.99	0.996	1.59816e-05
Ssr4	1.60269e-09	0.159775	0.929	0.905	1.87466e-05
Fabp5	1.61603e-09	0.174413	0.418	0.311	1.89027e-05
Ran	2.16386e-09	0.181389	0.943	0.916	2.53107e-05
Rpl35a	3.37247e-09	-0.071421	0.999	0.998	3.94478e-05
Rpl12	3.48866e-09	-0.102748	1	0.998	4.08068e-05
Nhp2	4.79685e-09	0.185751	0.706	0.63	5.61088e-05
Cox7a2l	6.99701e-09	-0.141667	0.966	0.981	8.18441e-05
Cd3e	8.51201e-09	-0.127687	0.975	0.991	9.9565e-05
Rpl8	9.60008e-09	0.0978503	1	0.999	0.000112292
Rpl18	9.67355e-09	0.0907475	1	1	0.000113152
Slc25a5	1.11775e-08	0.162614	0.939	0.931	0.000130743
Slc38a2	1.36251e-08	-0.225126	0.723	0.801	0.000159373
Gzmb	1.45777e-08	0.442854	0.948	0.926	0.000170515
Btg2	1.49376e-08	-0.270229	0.702	0.78	0.000174725
Pfn1	1.73817e-08	0.0934685	1	0.999	0.000203314
Bcl2	1.78861e-08	-0.179613	0.805	0.867	0.000209213
Rpl13	2.17171e-08	0.0712748	1	1	0.000254024
Rpl36	2.28037e-08	-0.0823055	0.999	1	0.000266735
Ubc	2.62201e-08	-0.219821	0.597	0.7	0.000306696
Gimap6	3.22289e-08	-0.177847	0.826	0.88	0.000376982
Tmsb4x	4.48163e-08	0.0994865	1	1	0.000524216
Ranbp1	4.58078e-08	0.189211	0.817	0.769	0.000535814
Manf	5.01453e-08	0.155351	0.858	0.844	0.00058655
Prdx2	5.07354e-08	0.165504	0.767	0.715	0.000593452
Atp5f1	5.92539e-08	0.125462	0.979	0.966	0.000693092
Rpl6	7.20198e-08	-0.0732588	1	0.999	0.000842415
Rps27a	7.29044e-08	0.0662433	0.999	0.999	0.000852762
Pomp	1.05162e-07	0.155657	0.937	0.927	0.00123008
B2m	1.60512e-07	-0.0813207	1	1	0.0018775
Snrpd1	1.60657e-07	0.173508	0.787	0.768	0.00187921
Cenpa	2.05514e-07	0.212802	0.667	0.591	0.00240389
Ostc	2.74798e-07	0.149262	0.862	0.827	0.00321431
Gm26825	2.92587e-07	-0.256545	0.386	0.471	0.00342239
AY036118	2.98561e-07	-0.160962	0.888	0.932	0.00349227
Ly6c2	3.3971e-07	-0.565143	0.43	0.503	0.00397359
Srsf2	3.62182e-07	0.172857	0.849	0.805	0.00423644
Tkt	3.67601e-07	0.18407	0.786	0.734	0.00429983
Eef1e1	4.18055e-07	0.16481	0.453	0.371	0.00488999
Fli1	4.3702e-07	-0.150996	0.521	0.609	0.00511182
mt-Nd4l	4.59734e-07	0.173562	0.702	0.64	0.00537751
Reep5	4.68717e-07	0.148668	0.936	0.916	0.00548258
Eef2	5.46776e-07	-0.0864711	0.997	0.994	0.00639564
Ifngr1	5.49588e-07	-0.160308	0.661	0.744	0.00642853
Maf	5.97498e-07	-0.152301	0.054	0.108	0.00698894
Gm47283	7.41407e-07	0.1821	0.755	0.7	0.00867224
Tomm5	9.05325e-07	0.162778	0.758	0.714	0.0105896
Rexo2	9.64934e-07	0.144151	0.691	0.631	0.0112868
Dbi	9.77625e-07	0.171952	0.771	0.727	0.0114353
Wls	1.04185e-06	-0.151321	0.296	0.385	0.0121866
mt-Nd2	1.04506e-06	-0.115076	0.992	0.995	0.0122241
Rps5	1.0925e-06	0.0672602	0.999	0.998	0.012779
Pdia6	1.09788e-06	0.173577	0.789	0.765	0.0128419
Eif3i	1.24747e-06	0.145604	0.893	0.866	0.0145916
Lgals1	1.28598e-06	0.114897	1	0.998	0.0150421
Pa2g4	1.73943e-06	0.181543	0.582	0.518	0.0203461
Rpl5	1.76618e-06	-0.091425	0.999	0.997	0.020659
Rbm3	1.82445e-06	0.110855	0.987	0.987	0.0213405
Oaz1	1.91065e-06	0.0859253	0.998	0.996	0.0223489
Tipin	1.97031e-06	0.153373	0.391	0.317	0.0230467
Ccl4	1.97662e-06	0.475848	0.829	0.787	0.0231206
Smdt1	2.1687e-06	0.138989	0.861	0.835	0.0253673
Stmn1	2.21783e-06	0.11997	0.2	0.132	0.025942
Txnl4a	2.24075e-06	0.139336	0.623	0.568	0.02621
Mettl1	2.26875e-06	0.11602	0.212	0.145	0.0265376
Slc16a11	2.45198e-06	0.159694	0.485	0.397	0.0286808
Cox5b	2.68418e-06	0.113022	0.978	0.97	0.0313969
Glrx3	2.70718e-06	0.130904	0.775	0.712	0.0316659
Cd226	2.70846e-06	0.148069	0.526	0.434	0.0316809
Il2rg	2.84872e-06	-0.143156	0.77	0.829	0.0333215
Siva1	3.36008e-06	0.145985	0.489	0.415	0.0393028
Ndufb9	3.5239e-06	0.121768	0.928	0.909	0.041219
Gm26917	3.58457e-06	0.337418	0.702	0.644	0.0419287
Calm1	3.94829e-06	0.101929	0.997	0.996	0.0461832
Anxa2	4.14885e-06	0.119444	0.989	0.986	0.0485291
Rps27l	4.18581e-06	0.145585	0.881	0.848	0.0489614
Mrpl12	4.36264e-06	0.135128	0.647	0.586	0.0510298
Psmb3	4.55074e-06	0.111771	0.932	0.927	0.05323
Gimap9	4.71808e-06	-0.137236	0.482	0.566	0.0551874
Cacybp	4.82933e-06	0.135467	0.724	0.68	0.0564887
Eef1b2	4.97156e-06	0.0837487	0.999	0.995	0.0581523
Tcrg-C2	5.53175e-06	-0.228582	0.427	0.507	0.0647049
Nop53	5.89048e-06	-0.123949	0.767	0.82	0.0689009
Cct7	5.91336e-06	0.124644	0.851	0.831	0.0691686
Gzmc	6.02733e-06	0.810533	0.147	0.091	0.0705017
Smyd5	6.54149e-06	0.0681878	0.112	0.063	0.0765158
Stk10	6.62441e-06	-0.110965	0.251	0.327	0.0774857
Itpkb	6.85065e-06	-0.194155	0.384	0.449	0.080132
Ndufab1	7.50836e-06	0.137566	0.784	0.764	0.0878253
Dctpp1	7.68145e-06	0.135448	0.362	0.289	0.08985
Atp5g3	8.55117e-06	0.131114	0.874	0.857	0.100023
Srsf7	9.24834e-06	0.153467	0.611	0.547	0.108178
Tsc22d4	1.02943e-05	-0.138642	0.848	0.878	0.120412
Fnbp1	1.0463e-05	-0.121594	0.597	0.671	0.122386
Ppa1	1.05836e-05	0.13646	0.554	0.482	0.123796
Ablim1	1.1457e-05	-0.149113	0.594	0.654	0.134013
Rack1	1.17177e-05	-0.0639165	1	0.999	0.137062
Sec61b	1.2398e-05	0.107346	0.982	0.98	0.14502
Snrpg	1.32726e-05	-0.110928	0.972	0.975	0.15525
Rpsa	1.32782e-05	0.0722452	1	1	0.155315
Camta1	1.33613e-05	0.100202	0.283	0.215	0.156287
Malat1	1.34928e-05	-0.19155	1	0.998	0.157825
Gm10076	1.38368e-05	0.166019	0.662	0.617	0.161849
Dnajc15	1.42834e-05	0.132892	0.476	0.41	0.167073
Snrpd2	1.52702e-05	0.10724	0.942	0.938	0.178615
Phb2	1.69857e-05	0.132095	0.81	0.772	0.198681
Colgalt1	1.71807e-05	0.0976385	0.25	0.183	0.200962
1110008F13Rik	1.72802e-05	0.136541	0.746	0.71	0.202126
Abracl	1.73274e-05	0.11751	0.966	0.966	0.202678
H2afz	1.84132e-05	0.134146	0.969	0.967	0.21538
Atp5g1	1.84291e-05	0.137912	0.867	0.847	0.215565
Fkbp2	1.85367e-05	0.160023	0.498	0.435	0.216824
Pgls	1.89778e-05	0.118426	0.838	0.816	0.221983
Gm10260	1.93177e-05	0.175032	0.762	0.732	0.225959
Rps3a1	2.00572e-05	0.0562718	1	1	0.234609
Chsy1	2.04789e-05	-0.1541	0.592	0.658	0.239542
Izumo1r	2.26496e-05	-0.139006	0.098	0.152	0.264933
Ets1	2.32336e-05	-0.117735	0.898	0.928	0.271764
Tmed9	2.4178e-05	0.109668	0.905	0.886	0.28281
Mif	2.66341e-05	0.157343	0.956	0.939	0.311539
Laptm5	2.6712e-05	-0.092207	0.99	0.998	0.312451
Fau	2.80728e-05	-0.0534246	1	1	0.328367
Havcr2	2.85517e-05	0.185349	0.695	0.647	0.33397
Kmt2d	3.13677e-05	-0.0882836	0.171	0.235	0.366908
Rpl28	3.38617e-05	0.0690669	1	1	0.396081
Agpat3	3.45441e-05	-0.137758	0.526	0.585	0.404062
Rassf5	3.55166e-05	-0.112671	0.528	0.608	0.415438
Prim1	3.62103e-05	0.0973617	0.204	0.144	0.423552
Hspe1	3.62663e-05	0.131497	0.948	0.931	0.424207
Ppp1r18	3.64281e-05	-0.135437	0.782	0.834	0.4261
Atpif1	3.66348e-05	0.12798	0.796	0.767	0.428517
Taf10	3.79529e-05	0.109631	0.912	0.893	0.443935
Rnaset2a	3.84949e-05	-0.0918047	0.975	0.978	0.450274
Eif4a1	3.8534e-05	0.123541	0.936	0.932	0.450732
Ube2n	3.93181e-05	0.127126	0.655	0.612	0.459904
Bcl2a1d	4.03962e-05	0.161426	0.849	0.84	0.472514
Hnrnpab	4.05641e-05	0.136229	0.732	0.694	0.474479
Kmt2c	4.19766e-05	-0.0940728	0.193	0.26	0.491001
Tyrobp	4.3595e-05	0.65771	0.109	0.065	0.509931
Pus1	4.59953e-05	0.0831998	0.262	0.194	0.538007
Psmb2	4.71862e-05	0.120079	0.867	0.829	0.551937
Erh	4.72443e-05	0.149292	0.599	0.544	0.552616
Ccl3	4.73113e-05	0.64958	0.621	0.561	0.553401
Shisa5	4.77499e-05	-0.123347	0.985	0.988	0.55853
Cinp	4.95134e-05	0.0672262	0.194	0.133	0.579158
Psma2	4.97574e-05	0.113541	0.937	0.92	0.582012
Hspa1a	5.12626e-05	-0.515068	0.117	0.17	0.599619
Dad1	5.37976e-05	0.115676	0.926	0.933	0.62927
Ifitm3	5.56197e-05	0.157746	0.471	0.387	0.650583
Rbm39	5.58175e-05	-0.107745	0.977	0.987	0.652897
Mxd4	5.61985e-05	-0.133525	0.401	0.472	0.657354
Gm26518	6.15972e-05	-0.0809754	0.092	0.142	0.720502
Btf3	6.32854e-05	0.0807894	0.995	0.989	0.740249
Bcl2a1b	6.55997e-05	0.141442	0.896	0.899	0.76732
Bcl2l11	6.69582e-05	-0.153712	0.415	0.483	0.78321
Pebp1	6.72556e-05	0.12068	0.85	0.837	0.786689
Cnbp	6.79698e-05	0.0950049	0.936	0.947	0.795042
Actr2	6.9113e-05	-0.125512	0.884	0.909	0.808415
Rpl4	6.97254e-05	-0.0667175	0.999	0.998	0.815578
Nop16	7.03083e-05	0.0871108	0.221	0.161	0.822396
Cd8b1	7.11801e-05	-0.0950429	0.966	0.991	0.832594
Sdhb	7.17036e-05	0.109302	0.787	0.759	0.838717
Rpl36a-ps1	7.24365e-05	-0.107331	0.351	0.425	0.84729
Ndufb7	7.30883e-05	0.110115	0.952	0.941	0.854913
Mrps24	7.5839e-05	0.12896	0.787	0.745	0.887089
Ccnd2	7.70526e-05	-0.150236	0.514	0.594	0.901284
Cyb5b	7.82505e-05	0.110454	0.415	0.343	0.915296
Mrps33	8.11278e-05	0.105812	0.776	0.721	0.948952
Wipf1	8.15411e-05	-0.12274	0.597	0.664	0.953786
Psmb6	8.4653e-05	0.115812	0.863	0.84	0.990187
Psma3	8.56079e-05	0.113645	0.905	0.893	1
Ifi203	8.6673e-05	-0.188155	0.826	0.869	1
C1qbp	8.68507e-05	0.13636	0.65	0.605	1
Rgs10	9.15437e-05	-0.0752921	0.087	0.136	1
Ikzf2	9.18177e-05	-0.199598	0.523	0.582	1
Crim1	9.24481e-05	-0.0812811	0.102	0.154	1
Atp2a3	9.48982e-05	-0.0758358	0.146	0.203	1
Capg	9.96236e-05	0.118063	0.94	0.906	1
Gabarap	0.000101103	-0.0907312	0.928	0.952	1
Zyx	0.000101973	-0.0971353	0.823	0.87	1
Mrpl18	0.000102222	0.134091	0.735	0.695	1
Uba2	0.000102409	0.0939054	0.497	0.425	1
Rps23	0.000103987	-0.0449857	1	0.999	1
Tctex1d2	0.000104131	0.132016	0.141	0.095	1
Atp6v0d1	0.000107609	0.106893	0.385	0.319	1
U2af1	0.00011059	0.125174	0.717	0.677	1
Runx3	0.000113227	-0.12259	0.851	0.888	1
Neat1	0.0001149	-0.190506	0.5	0.569	1
Gapdh	0.000115325	0.102992	0.999	0.999	1
Arpc1b	0.000118996	0.0830911	0.991	0.995	1
Vgll4	0.000120087	-0.0982523	0.525	0.603	1
Dut	0.000120866	0.197317	0.763	0.754	1
Cycs	0.000122356	0.128712	0.854	0.821	1
Prdx1	0.000122758	0.111711	0.943	0.931	1
F2r	0.000124587	-0.12358	0.415	0.489	1
Rpl22l1	0.000125012	0.103203	0.985	0.976	1
Ahnak	0.000125569	-0.128719	0.805	0.848	1
Rpl3	0.00012836	0.0678343	1	1	1
Lsm6	0.000129535	0.106583	0.725	0.663	1
Bloc1s1	0.000134998	-0.0910062	0.454	0.516	1
Copa	0.000137916	-0.0989329	0.337	0.407	1
Ddx5	0.000138486	-0.0897466	0.993	0.995	1
Cks1b	0.00014188	0.0741551	0.136	0.09	1
Psmd12	0.000146483	0.1073	0.631	0.565	1
H2-T22	0.000152765	-0.126244	0.867	0.894	1
Pcbp2	0.000154555	-0.121029	0.854	0.87	1
Cox7a2	0.000155769	0.100262	0.969	0.963	1
Dtymk	0.000157915	0.131122	0.515	0.45	1
Clip1	0.000159056	-0.0724308	0.136	0.191	1
Selplg	0.000165389	-0.0996873	0.922	0.935	1
Fbl	0.000165716	0.123294	0.637	0.579	1
Phb	0.000167371	0.112772	0.484	0.417	1
Ppp6r1	0.000169857	-0.106379	0.459	0.528	1
Eif2s1	0.000171571	0.109723	0.737	0.691	1
Gimap4	0.000180476	-0.133631	0.905	0.928	1
Arf6	0.000183222	-0.0979833	0.688	0.74	1
Anp32b	0.000184446	0.121175	0.934	0.913	1
Use1	0.000184889	-0.112717	0.509	0.569	1
Cdc42se2	0.00018517	-0.0997835	0.329	0.398	1
Gimap8	0.000186372	-0.0928386	0.468	0.549	1
Selenoh	0.000190112	0.133583	0.677	0.633	1
Stk4	0.000193248	-0.117354	0.55	0.604	1
Rpn1	0.000195434	0.125385	0.48	0.424	1
Son	0.000196558	-0.111039	0.912	0.937	1
Ftsj3	0.000196772	0.0909512	0.26	0.201	1
Abcg1	0.000196854	-0.0993382	0.159	0.212	1
Tk1	0.000198525	0.095756	0.169	0.12	1
Mrpl20	0.000200912	0.115994	0.713	0.683	1
Sptan1	0.000207131	-0.104324	0.429	0.489	1
Kin	0.000209471	0.0816824	0.237	0.18	1
Mrpl34	0.000212818	0.114287	0.562	0.508	1
Trgv2	0.000216742	-0.135494	0.327	0.392	1
Serf2	0.000217313	0.0648717	0.997	0.998	1
Gm2000	0.000221602	-0.097416	0.57	0.623	1
Sub1	0.000222183	0.0685435	0.996	0.993	1
Mxi1	0.000222609	-0.103999	0.258	0.323	1
Srsf6	0.000225065	0.110388	0.587	0.53	1
Wdr74	0.000235809	0.0804448	0.207	0.151	1
Fam53b	0.000243398	-0.10022	0.169	0.222	1
Nckap1l	0.000245381	-0.0807272	0.321	0.395	1
Gm10073	0.00025101	0.111158	0.321	0.261	1
Mdh1	0.000254323	0.112849	0.813	0.789	1
Ndufb5	0.000254933	0.112672	0.878	0.866	1
Mcm3	0.000256856	0.101465	0.293	0.232	1
Ifitm1	0.000258887	0.222039	0.242	0.18	1
Hspa1b	0.000261895	-0.408755	0.172	0.221	1
Tes	0.000271041	-0.0929617	0.751	0.797	1
Arf5	0.00027166	0.0754858	0.969	0.97	1
Ctla2a	0.000272289	-0.149752	0.867	0.904	1
Ndufb8	0.000273866	0.101316	0.893	0.862	1
Ybx3	0.000279156	0.122668	0.905	0.896	1
Ptdss1	0.000300882	-0.0676906	0.129	0.179	1
Junb	0.000301281	-0.168278	0.865	0.897	1
Timm13	0.000305383	0.11162	0.813	0.789	1
Nubp1	0.000305893	0.105083	0.537	0.478	1
Rplp0	0.000314032	0.0595362	1	1	1
Sec62	0.000316949	-0.130612	0.773	0.815	1
Rpl36a	0.000318685	-0.0618124	0.997	0.996	1
Gimap3	0.000319849	-0.147933	0.861	0.883	1
AW112010	0.00032241	0.0968243	1	0.999	1
Tln1	0.000330915	-0.110752	0.902	0.933	1
Psmb8	0.000330996	0.0675427	0.996	0.996	1
Ndufa3	0.000333976	-0.0952436	0.784	0.822	1
Cd6	0.000339008	-0.10466	0.345	0.412	1
Ndufs6	0.000339475	0.119552	0.831	0.824	1
Rbx1	0.000345383	0.0887779	0.953	0.949	1
Grcc10	0.000351746	-0.10943	0.592	0.662	1
Pgam1	0.000358987	0.110258	0.866	0.848	1
Clint1	0.00036923	-0.0940863	0.381	0.45	1
Ndufa8	0.000377077	0.0928619	0.804	0.777	1
Malt1	0.000379071	-0.0981623	0.505	0.565	1
Ptpn9	0.000379269	-0.105489	0.207	0.263	1
Rinl	0.000380188	-0.092224	0.82	0.874	1
Scg5	0.000390262	-0.0538012	0.089	0.134	1
Spcs2	0.000392657	0.0816772	0.951	0.945	1
Atp5j	0.000400617	0.090818	0.966	0.966	1
Dph3	0.000410314	0.109189	0.631	0.586	1
Baz2a	0.000414088	-0.100566	0.265	0.324	1
Uchl3	0.000418813	0.11701	0.529	0.469	1
Ndufs8	0.000431336	0.127723	0.674	0.647	1
H2-K1	0.000438108	-0.0682685	0.999	0.999	1
Grpel1	0.00044983	0.103897	0.562	0.512	1
Ndufaf4	0.000449915	0.0883379	0.303	0.242	1
Nifk	0.000465838	0.103084	0.364	0.306	1
Fkbp1a	0.000467898	0.118315	0.911	0.912	1
Rock1	0.000468487	-0.100496	0.706	0.769	1
Serinc3	0.000471085	-0.113558	0.694	0.733	1
Txn2	0.000476552	0.115865	0.708	0.662	1
Zfp36l2	0.000486926	-0.12402	0.634	0.684	1
Rplp1	0.00048798	-0.04828	1	0.998	1
Sp100	0.000492644	-0.101329	0.81	0.863	1
Atp5o.1	0.000493548	0.103852	0.902	0.914	1
Tceal9	0.000516005	0.0803422	0.485	0.418	1
Acot8	0.000521922	0.0847558	0.273	0.213	1
Ddx39	0.000537148	0.119471	0.511	0.451	1
Ndufs7	0.000551445	0.0977282	0.736	0.692	1
Golgb1	0.000552602	0.0847118	0.28	0.22	1
Stat4	0.000559049	-0.115327	0.416	0.475	1
Cmtm7	0.000561902	0.177893	0.811	0.776	1
Cbx3	0.000569569	-0.0999056	0.808	0.835	1
Crebrf	0.000577198	-0.119213	0.2	0.251	1
Uqcrq	0.000580733	0.0965727	0.916	0.916	1
Snu13	0.000585994	0.104318	0.829	0.803	1
Pin1	0.000602295	0.10444	0.529	0.475	1
Arhgap9	0.000614108	-0.117412	0.67	0.719	1
Cisd1	0.000616406	0.120268	0.532	0.5	1
Arid5a	0.000622505	-0.0731967	0.376	0.44	1
Ccm2	0.000624078	-0.0536455	0.191	0.249	1
Mrpl27	0.000625739	0.0975204	0.409	0.352	1
Cdkn1b	0.000647609	-0.124075	0.51	0.56	1
Mpc1	0.000648832	0.110708	0.556	0.514	1
Sp1	0.00066086	-0.0727088	0.162	0.213	1
Hnrnpf	0.00066352	0.0832806	0.947	0.938	1
Mrpl28	0.00067696	0.10198	0.37	0.314	1
Set	0.000680444	0.0902123	0.935	0.941	1
Clk1	0.00069619	-0.133751	0.669	0.705	1
Psme2	0.000705635	0.0947133	0.947	0.938	1
Hsp90b1	0.000717026	0.112941	0.942	0.955	1
Gm8797	0.000720421	-0.0874913	0.342	0.405	1
Fundc2	0.000732197	0.106394	0.763	0.729	1
Psmd13	0.000735854	0.0968373	0.63	0.584	1
Mark2	0.000737585	-0.0941042	0.375	0.435	1
Mfsd4a	0.000752082	-0.0498997	0.07	0.108	1
Nap1l1	0.000761532	0.103141	0.934	0.925	1
Atp5c1	0.000764308	0.0857358	0.978	0.962	1
Akr1b3	0.00076925	0.118142	0.69	0.654	1
Usmg5	0.000770514	-0.0885067	0.851	0.858	1
Umps	0.000771532	0.0551285	0.195	0.144	1
Nup54	0.000772034	0.087383	0.221	0.172	1
Rps20	0.000775456	0.0471644	1	1	1
Nolc1	0.000784393	0.0660284	0.342	0.286	1
Srm	0.000789309	0.116021	0.249	0.203	1
Ppil1	0.000794986	0.0851729	0.261	0.21	1
Psma4	0.0007959	0.0882965	0.891	0.873	1
Rfc2	0.000798757	0.11481	0.548	0.504	1
Tapbpl	0.000801811	-0.126385	0.446	0.5	1
Smim11	0.00081113	0.0983947	0.644	0.594	1
Il18r1	0.000817459	0.0476932	0.459	0.386	1
Arhgap4	0.000822048	-0.0628625	0.241	0.3	1
Spry2	0.000822562	-0.117115	0.257	0.31	1
B930036N10Rik	0.000822914	-0.0962597	0.092	0.133	1
Rab27a	0.000854049	-0.0671377	0.336	0.4	1
Cd200	0.000873794	0.0878155	0.397	0.335	1
Ddx50	0.00088357	-0.0963431	0.609	0.67	1
Mlec	0.000886814	0.101938	0.647	0.6	1
Myh9	0.000889743	-0.0775413	0.867	0.91	1
Dnajb1	0.000902228	-0.0975285	0.337	0.397	1
Rgs8	0.00090411	0.122494	0.19	0.146	1
1810037I17Rik	0.00091663	0.0897828	0.94	0.926	1
Gstp3	0.000942856	0.105449	0.474	0.418	1
Crbn	0.000966447	-0.090041	0.573	0.631	1
Itgal	0.000967966	-0.143834	0.756	0.799	1
Nkg7	0.000995428	-0.0497325	0.999	1	1
Npc2	0.000996635	-0.0994053	0.905	0.936	1
Eif4a2	0.000998117	-0.0922147	0.699	0.745	1
Mpp6	0.00100885	0.107665	0.418	0.364	1
Ifitm2	0.00102393	0.191917	0.431	0.363	1
Chchd2	0.00103357	0.0729721	0.987	0.99	1
Ly6c1	0.00104827	-0.172978	0.242	0.297	1
Dazap1	0.00108358	0.0791646	0.578	0.521	1
Man2b2	0.00108918	0.0465074	0.128	0.088	1
Cct8	0.00109763	0.0997075	0.802	0.781	1
Prelid1	0.00110152	0.0907687	0.911	0.897	1
Psma5	0.00110792	0.0901002	0.797	0.794	1
Pop5	0.00111248	0.115045	0.67	0.64	1
Rab8b	0.0011199	-0.115115	0.67	0.715	1
AB124611	0.00113875	-0.0590992	0.16	0.21	1
Atox1	0.00114413	0.100504	0.866	0.841	1
Ufm1	0.0011452	0.112838	0.541	0.49	1
Lig1	0.00114802	0.102736	0.245	0.192	1
Mettl22	0.00117701	0.0506036	0.107	0.071	1
Abca7	0.00118236	-0.0467964	0.084	0.123	1
Nol6	0.00120421	-0.0443017	0.079	0.117	1
Hspd1	0.00120658	0.10997	0.728	0.699	1
Mrps18c	0.00121156	0.103785	0.645	0.604	1
Trav3-3	0.00126437	-0.0496302	0.066	0.1	1
Ddx3x	0.00126442	-0.11576	0.391	0.437	1
Klf13	0.00126493	-0.0881834	0.521	0.58	1
N4bp2l1	0.00126942	-0.0706482	0.273	0.327	1
Rbm8a	0.00132637	0.0935556	0.691	0.66	1
Rpl29	0.00133241	0.076694	0.309	0.256	1
Atp5h	0.00133355	0.0666961	0.99	0.989	1
Sp110	0.00133422	-0.115424	0.65	0.697	1
Mrpl23	0.00134911	0.100901	0.63	0.575	1
Tsix	0.00135063	-0.0757409	0.154	0.201	1
Sesn3	0.00135986	-0.0841073	0.212	0.265	1
Filip1l	0.00136667	-0.0910894	0.21	0.257	1
Cenpx	0.00137657	0.113736	0.638	0.595	1
Rnaseh2c	0.00137799	0.0927935	0.591	0.541	1
Dusp10	0.0013832	-0.071229	0.145	0.191	1
Itga6	0.00138433	-0.0518614	0.074	0.111	1
Pdcd6ip	0.00138903	-0.0891582	0.626	0.669	1
Ddit4	0.00141443	-0.116754	0.277	0.33	1
Tmed2	0.00142223	0.0904182	0.87	0.848	1
Etv3	0.00143849	-0.0595424	0.138	0.185	1
Psmb4	0.00143995	0.0834623	0.901	0.873	1
Ddx58	0.00145046	-0.0686415	0.295	0.353	1
Dynlt1c	0.00148305	0.0612286	0.181	0.136	1
Psmd8	0.00151232	0.103108	0.814	0.805	1
Eomes	0.00151964	-0.0963282	0.195	0.246	1
Erbin	0.00152869	-0.0830771	0.274	0.328	1
Mxd1	0.0015288	-0.0801016	0.156	0.203	1
Usp16	0.00153686	0.0891805	0.367	0.308	1
Gzmf	0.00155947	0.700016	0.204	0.162	1
Timm50	0.00155998	0.0774776	0.341	0.281	1
Polr2l	0.00157253	0.0666768	0.262	0.212	1
Rpl10	0.00157426	0.0666658	0.999	0.998	1
Stoml2	0.00158106	0.0940572	0.428	0.374	1
Luc7l3	0.00158505	0.0942009	0.627	0.571	1
Btg3	0.00161694	0.0787793	0.242	0.196	1
Nrbp1	0.00162225	-0.0836185	0.359	0.413	1
Narf	0.00162426	-0.0636723	0.155	0.203	1
Ak6	0.00164038	0.0688162	0.254	0.202	1
Slc25a3	0.00164253	0.0673147	0.98	0.981	1
Uqcrc1	0.00165118	0.113656	0.64	0.591	1
Cst7	0.00165362	-0.0995546	0.956	0.969	1
Prdx4	0.00166274	0.0398697	0.102	0.068	1
Ppib	0.00166698	0.0730819	0.989	0.984	1
Mbnl1	0.00167108	-0.0752506	0.979	0.987	1
Wdr18	0.00174068	0.07682	0.322	0.266	1
Psma7	0.00174581	0.0784527	0.962	0.959	1
Lap3	0.00174779	0.0735827	0.277	0.224	1
Rbms1	0.00176463	-0.1154	0.667	0.701	1
Ppan	0.00176817	0.0862953	0.268	0.22	1
Lamtor2	0.00177442	0.0865694	0.839	0.824	1
Samsn1	0.00178892	-0.0871046	0.86	0.887	1
Zc3h6	0.00178945	-0.0574773	0.071	0.105	1
Ccdc6	0.00179087	0.0734865	0.188	0.144	1
Tcp1	0.00182212	0.103496	0.652	0.614	1
Sdf2l1	0.00185604	0.10918	0.49	0.448	1
Vps13c	0.00186251	-0.0931329	0.254	0.301	1
Tob1	0.00191779	-0.0511831	0.078	0.113	1
Aebp2	0.00191871	-0.0966988	0.517	0.566	1
Dtd1	0.00192107	0.0963226	0.442	0.392	1
Arid1a	0.00195195	-0.0922986	0.411	0.469	1
Arhgef6	0.0019577	-0.0789022	0.504	0.563	1
Tmem167	0.00197295	0.0754748	0.858	0.847	1
Emg1	0.0019793	0.0816327	0.818	0.79	1
Gpr183	0.00209084	-0.124081	0.246	0.296	1
Tma7	0.00211614	0.0695832	0.983	0.984	1
Rbbp8	0.0021235	0.052205	0.133	0.095	1
Cela1	0.00213927	-0.0704149	0.108	0.147	1
Rfc4	0.00214757	0.0582036	0.167	0.125	1
Mrps12	0.0021616	0.0781093	0.318	0.269	1
Hist1h1e	0.0021631	-0.131054	0.842	0.858	1
Sigmar1	0.00217106	0.0531586	0.113	0.078	1
Fbxl5	0.00224922	0.0746771	0.226	0.179	1
Whamm	0.00231107	-0.0654022	0.149	0.194	1
Banf1	0.00232324	0.101855	0.597	0.548	1
Asxl2	0.00233374	-0.073395	0.285	0.346	1
Npm1	0.00236521	0.0768671	0.993	0.991	1
Gm14029	0.00237585	-0.0630163	0.124	0.166	1
Hdgf	0.00239353	0.0985227	0.563	0.523	1
Arhgef9	0.00240308	0.0460081	0.171	0.128	1
Ndufc2	0.00242132	0.105155	0.792	0.79	1
Sssca1	0.00242918	0.0719155	0.389	0.334	1
Mrpl17	0.00243149	0.0881994	0.513	0.456	1
Chchd1	0.00244566	0.0997687	0.629	0.593	1
Gart	0.00244901	0.0737338	0.198	0.156	1
Cnn2	0.00245513	-0.0859195	0.949	0.955	1
Sorl1	0.00246018	-0.0919582	0.376	0.428	1
Brpf1	0.00246022	0.0575071	0.143	0.105	1
1700097N02Rik	0.00250966	-0.0941546	0.376	0.433	1
Bsg	0.00251602	0.0936402	0.858	0.844	1
Klhl28	0.00253592	-0.0675061	0.167	0.211	1
Hsd17b12	0.00254236	0.0918979	0.468	0.407	1
Hspbp1	0.0025636	0.096954	0.365	0.313	1
Jak3	0.00260676	-0.0784636	0.283	0.334	1
Rpl41	0.00261135	-0.0549928	1	1	1
1500009L16Rik	0.00267339	0.0608394	0.11	0.077	1
Fkbp3	0.00268951	0.0864921	0.872	0.855	1
Mrpl42	0.00271048	0.0984317	0.641	0.613	1
Sec11a	0.00273921	0.0927456	0.807	0.775	1
Gmfg	0.00275186	0.0820548	0.948	0.943	1
Cdca7	0.00275199	0.061194	0.124	0.088	1
Timm17a	0.00275332	0.0835126	0.615	0.572	1
Evl	0.00276309	-0.0940221	0.518	0.575	1
Tnfrsf9	0.00276919	0.126036	0.943	0.923	1
Hmg20b	0.00278345	0.0750037	0.352	0.301	1
Prrc2b	0.00279851	-0.104236	0.414	0.461	1
Mrps14	0.00280095	0.081403	0.889	0.866	1
Gstp1	0.0028027	0.0818445	0.226	0.182	1
Mrpl22	0.00281096	0.0757283	0.268	0.222	1
Jun	0.00281207	-0.108908	0.693	0.751	1
Zcrb1	0.00281513	0.0816838	0.72	0.69	1
Rpl10a	0.00283056	0.0511847	0.999	0.997	1
Aen	0.00288315	0.0695059	0.229	0.18	1
Dnm1l	0.00289244	-0.0777735	0.269	0.322	1
Pop7	0.00290599	0.0846858	0.395	0.347	1
Spty2d1	0.00296132	-0.0791838	0.321	0.382	1
Gimap7	0.00302916	-0.0898385	0.928	0.939	1
Romo1	0.00305764	-0.0948943	0.687	0.735	1
Ccdc86	0.00305936	0.0647403	0.21	0.166	1
Cd164	0.00308574	-0.0931517	0.82	0.821	1
Tuba4a	0.0031084	0.0988599	0.37	0.32	1
Papss1	0.00311466	-0.0514711	0.113	0.152	1
Ncbp2	0.00314114	0.107964	0.427	0.389	1
Ftl1	0.00318952	0.103891	0.99	0.987	1
Calr	0.00321267	0.0880566	0.944	0.935	1
Hist1h2be	0.00328559	-0.0699141	0.139	0.178	1
Nsun2	0.00330273	0.0814578	0.337	0.289	1
Zfp646	0.00332778	-0.0591783	0.151	0.195	1
Pld3	0.00332842	-0.0814636	0.65	0.704	1
Nabp1	0.00334241	-0.115201	0.733	0.769	1
Ppp1r9b	0.00334689	-0.0480169	0.133	0.176	1
Ebna1bp2	0.00337442	0.11585	0.609	0.557	1
Alyref	0.0033819	0.096041	0.553	0.521	1
Crot	0.00340979	-0.0927802	0.427	0.468	1
Eif3k	0.00341681	0.0742805	0.975	0.973	1
Tox	0.00344291	-0.102378	0.861	0.898	1
Dennd1b	0.00346335	-0.0862866	0.441	0.49	1
Pglyrp1	0.00351537	0.102859	0.937	0.93	1
BC005561	0.00357643	0.0909953	0.202	0.162	1
Dusp2	0.00361885	-0.142141	0.832	0.86	1
Cst3	0.00365176	0.113804	0.86	0.854	1
Tpm3-rs7	0.00366925	0.0861979	0.858	0.86	1
Ift27	0.00367301	0.0610351	0.192	0.151	1
Idi1	0.00368133	0.0509851	0.236	0.188	1
Ndufa6	0.00368809	-0.0759739	0.895	0.903	1
Haghl	0.00376258	-0.0585012	0.132	0.171	1
Timm9	0.00378874	0.0795122	0.282	0.236	1
Ubl4a	0.00380142	0.0960738	0.407	0.354	1
Fryl	0.00382277	-0.0626754	0.265	0.317	1
Txn1	0.00382832	0.0743108	0.987	0.991	1
Pwwp2a	0.00385936	0.0753772	0.187	0.146	1
Arl5a	0.00386877	-0.0906511	0.458	0.512	1
Stk17b	0.0038704	-0.0827295	0.922	0.929	1
Spata13	0.00388359	-0.068834	0.234	0.285	1
Saraf	0.00392821	-0.0685854	0.657	0.713	1
Srpr	0.00402519	0.0926619	0.493	0.453	1
Serpinb6a	0.00403532	0.0826447	0.784	0.748	1
Ugcg	0.00411516	-0.111913	0.928	0.941	1
Kpna4	0.00413614	-0.067386	0.382	0.433	1
Atxn2l	0.00413945	-0.0816718	0.38	0.429	1
Diaph1	0.0041537	-0.0719343	0.734	0.769	1
Snrpa1	0.00420241	0.10791	0.623	0.579	1
E2f4	0.00423082	0.0836004	0.424	0.38	1
Krtcap2	0.00425041	0.060746	0.949	0.952	1
2022-09-11	0.00430906	0.0918765	0.703	0.68	1
Ufc1	0.0043102	0.08591	0.675	0.649	1
Slc25a30	0.00431744	-0.0303066	0.089	0.125	1
Trbc2	0.00432574	0.0337393	0.987	0.998	1
Cct5	0.00434482	0.101688	0.866	0.843	1
Nfyb	0.00434512	-0.0846523	0.428	0.477	1
Ruvbl1	0.00435025	0.0748688	0.362	0.314	1
Ndufa10	0.00435429	0.0822774	0.656	0.621	1
Pdia3	0.00435642	0.100312	0.91	0.927	1
Rida	0.00436262	0.0611752	0.216	0.171	1
Apex1	0.00441825	0.0807241	0.211	0.171	1
Vwa5a	0.00444279	-0.0726856	0.128	0.165	1
Chaf1b	0.00446214	0.0429536	0.155	0.116	1
Cd2	0.00447533	0.123347	0.808	0.785	1
Eef1a1	0.00450779	-0.0337306	1	1	1
Wdr83os	0.0045111	0.0786618	0.5	0.456	1
Tmem243	0.00451284	-0.0849821	0.286	0.338	1
Ap1s2	0.00451344	-0.0876462	0.391	0.445	1
Prpf31	0.00453403	0.0911895	0.326	0.284	1
Mrps17	0.00455101	0.0917158	0.513	0.464	1
Smarcb1	0.00457981	0.0661695	0.452	0.397	1
Grap2	0.00466971	-0.0906598	0.207	0.25	1
Pde6d	0.00468066	-0.0420085	0.128	0.169	1
Cyb5a	0.0047047	0.0887409	0.696	0.671	1
Fhl2	0.00473955	0.0858072	0.315	0.269	1
Parp14	0.00474952	-0.0743239	0.441	0.5	1
Rfxap	0.0047507	-0.0744621	0.334	0.387	1
Ppwd1	0.00476004	-0.0976607	0.292	0.336	1
Mndal	0.00485239	-0.124569	0.858	0.897	1
H2-D1	0.00487674	-0.045281	1	1	1
Nipsnap2	0.00488799	-0.0571997	0.124	0.161	1
2410015M20Rik	0.0049045	0.0608913	0.839	0.831	1
Prdx3	0.00492977	0.0977959	0.439	0.398	1
St3gal6	0.004976	-0.0747119	0.264	0.31	1
Rpl9	0.00501088	0.0386907	0.999	1	1
Psma1	0.00503722	0.0945112	0.854	0.815	1
2810474O19Rik	0.00505469	-0.100994	0.424	0.472	1
Dnajc30	0.0050822	0.0514442	0.169	0.131	1
Zfp422	0.00510644	0.0505958	0.119	0.086	1
Lmbr1l	0.00512708	-0.0506989	0.103	0.138	1
Hist2h2ac	0.00514447	-0.0788233	0.201	0.243	1
Ubp1	0.00519928	-0.0556689	0.17	0.211	1
Hist1h4c	0.005229	-0.0457498	0.087	0.119	1
Prkcq	0.00524705	-0.065651	0.444	0.489	1
Dusp1	0.00525658	-0.167434	0.35	0.397	1
Gimap1	0.00526314	-0.0824005	0.902	0.919	1
Anapc15	0.0052954	0.0564644	0.268	0.22	1
Fosl2	0.00531837	-0.0712481	0.275	0.324	1
Xrn1	0.0053354	-0.102287	0.366	0.418	1
Tmem14c	0.00535786	0.0921235	0.783	0.766	1
Cntrl	0.00541215	-0.0833185	0.652	0.701	1
Otud7b	0.00541711	-0.0527588	0.102	0.138	1
Ywhah	0.00546768	0.0775285	0.822	0.81	1
Irf2bp2	0.00549654	-0.0923909	0.227	0.27	1
Taf11	0.00550141	0.0715762	0.321	0.274	1
Gbp7	0.00555958	-0.131204	0.633	0.676	1
Psmb5	0.00556503	0.0792893	0.823	0.805	1
Nudt19	0.0055734	0.0671206	0.384	0.33	1
Ube2b	0.00558804	-0.0753078	0.817	0.864	1
Fdps	0.0056122	0.0617553	0.233	0.192	1
Tsr1	0.00565119	0.0419868	0.147	0.11	1
Fam162a	0.00568687	0.113869	0.658	0.618	1
Dusp6	0.00569683	-0.10192	0.279	0.322	1
Gadd45gip1	0.00573646	0.0725375	0.368	0.321	1
Tomm40	0.00577953	0.0806696	0.434	0.396	1
Ttc33	0.00580715	-0.051868	0.203	0.246	1
Ndufa11	0.00587549	0.0849932	0.821	0.812	1
Elp5	0.00590631	0.0556246	0.247	0.202	1
Ppp1r14b	0.00591995	0.102257	0.726	0.704	1
Ivns1abp	0.00593343	0.0685625	0.292	0.241	1
Trim56	0.00597843	-0.0744104	0.167	0.208	1
Pclaf	0.00602341	0.0609926	0.163	0.125	1
Aprt	0.00607092	0.100244	0.933	0.93	1
Acap2	0.00607409	-0.0676725	0.195	0.235	1
Bms1	0.00607964	-0.0921021	0.25	0.296	1
Gtf2h5	0.00609303	0.103077	0.728	0.708	1
Eif1ax	0.00610861	0.0843788	0.715	0.693	1
Nop14	0.00611562	0.0683052	0.282	0.237	1
Mvk	0.00613883	0.052823	0.113	0.084	1
Slc16a6	0.00615254	-0.0818606	0.198	0.242	1
Ms4a4b	0.00619395	-0.048411	0.992	0.995	1
Ppil3	0.0062174	0.0787923	0.414	0.367	1
Pde3b	0.00625033	-0.0793887	0.34	0.391	1
Orc4	0.00626283	-0.0563316	0.274	0.321	1
Uqcrh	0.00627812	-0.0578563	0.991	0.991	1
Gm6169	0.00630342	-0.0581894	0.166	0.207	1
Eef2kmt	0.00631135	0.0635082	0.169	0.134	1
Slamf7	0.00633428	-0.100592	0.126	0.163	1
Carnmt1	0.00633767	0.0570873	0.259	0.214	1
Nudcd2	0.00633797	0.0724587	0.467	0.425	1
Eya3	0.00643765	0.0422918	0.105	0.074	1
Arhgap45	0.00650365	-0.0685142	0.564	0.618	1
Srp68	0.00655777	-0.0636152	0.241	0.285	1
Ube2h	0.00668618	-0.0525363	0.39	0.448	1
1810030O07Rik	0.00679596	0.0484623	0.283	0.234	1
Sec61g	0.00683111	-0.0710441	0.972	0.972	1
Ldlr	0.00683633	0.0638164	0.104	0.074	1
Atp5g2	0.00684378	0.0615655	0.987	0.977	1
Ypel3	0.0069134	-0.101153	0.519	0.562	1
Tacc1	0.00700705	-0.0911595	0.676	0.722	1
Bag1	0.00701096	0.0779755	0.84	0.815	1
Emp3	0.00701114	0.13244	0.504	0.462	1
Rap2b	0.00701901	-0.0521465	0.135	0.173	1
Snrpe	0.00702722	0.0731559	0.966	0.959	1
Ociad2	0.00713391	0.0871165	0.431	0.383	1
Phf1	0.00714006	-0.0583237	0.134	0.17	1
Eif5	0.00715368	-0.116054	0.793	0.814	1
Hivep1	0.00715487	-0.0619957	0.149	0.187	1
S100a1	0.00716739	0.0855232	0.215	0.175	1
Commd5	0.00722963	-0.0341193	0.077	0.107	1
Ncald	0.00723799	-0.0378523	0.111	0.147	1
Ncl	0.00727228	0.0943448	0.95	0.939	1
Mak16	0.00730727	0.0931712	0.353	0.306	1
Fam26f	0.00740127	-0.0757055	0.142	0.179	1
Klhl6	0.00740714	-0.0663697	0.176	0.214	1
Srsf3	0.00750751	0.0805728	0.941	0.926	1
Ptpn12	0.00751557	-0.0919759	0.207	0.244	1
Rpl26	0.00752497	-0.0415398	0.999	0.998	1
Pde4d	0.00754766	-0.0620456	0.227	0.274	1
Gem	0.00762325	0.0739496	0.621	0.575	1
Gpatch11	0.00765092	-0.0837826	0.368	0.414	1
Ppie	0.00773673	0.0864536	0.505	0.461	1
Fam189b	0.00774593	-0.0720396	0.314	0.361	1
Cd82	0.00776485	-0.0794128	0.565	0.61	1
Tpm4	0.00776853	0.096083	0.626	0.598	1
Anapc13	0.00779061	-0.0762736	0.463	0.513	1
Pip5k1a	0.00784479	-0.0645591	0.189	0.231	1
Gnb2	0.00786369	0.0599664	0.922	0.93	1
Gmpr2	0.00789319	0.0473544	0.196	0.156	1
Bckdha	0.0079104	-0.0333466	0.119	0.156	1
Akap13	0.007938	-0.0808812	0.902	0.927	1
Cir1	0.00799472	-0.0928937	0.306	0.348	1
Ndufb2	0.00799882	0.0898586	0.751	0.729	1
Gm4070	0.00809605	-0.0452614	0.09	0.122	1
Mtdh	0.0081487	0.108606	0.811	0.794	1
Rbl2	0.00819876	-0.0617122	0.621	0.655	1
Nucb1	0.00820404	-0.071202	0.787	0.812	1
Nans	0.00820534	0.0852368	0.528	0.491	1
Psd4	0.00824962	-0.083897	0.302	0.343	1
Pqlc3	0.00829948	-0.0659053	0.292	0.339	1
Mir155hg	0.0083588	0.0830052	0.281	0.24	1
Guk1	0.00835889	0.0734483	0.468	0.424	1
Snrpf	0.00835906	0.0773175	0.892	0.894	1
Brd9	0.00836639	-0.0627779	0.304	0.349	1
Cops4	0.00839389	0.0932726	0.614	0.609	1
Smpdl3a	0.00843093	-0.0787205	0.345	0.389	1
Lyar	0.00850512	0.0861626	0.482	0.435	1
Herc1	0.00853923	-0.0643554	0.365	0.421	1
Pkm	0.00855343	0.0831474	0.975	0.955	1
Slc35d1	0.00865848	0.0420994	0.112	0.081	1
Tcea1	0.00866902	-0.0751749	0.578	0.627	1
Pacs1	0.0087747	-0.0718274	0.186	0.221	1
Ssr2	0.00877637	0.0810334	0.759	0.741	1
Ntmt1	0.00887194	0.0603264	0.167	0.133	1
Tob2	0.00887672	-0.0809617	0.267	0.311	1
Mob3a	0.00891788	-0.0599928	0.376	0.433	1
Ppp1r11	0.00895081	0.103421	0.704	0.679	1
Glmn	0.00896282	0.0593824	0.309	0.262	1
Lasp1	0.00897159	-0.0766609	0.447	0.496	1
Ptbp3	0.00898702	-0.0812437	0.834	0.858	1
Cdkn2d	0.00901399	-0.0671526	0.222	0.265	1
Taldo1	0.00908256	0.078773	0.879	0.864	1
Lrp10	0.00914523	-0.0563482	0.528	0.582	1
Chd3	0.00920901	-0.0929207	0.286	0.326	1
Sec11c	0.00924631	0.0754619	0.946	0.934	1
Cdca7l	0.00927254	0.0705703	0.245	0.206	1
Errfi1	0.00933965	-0.04538	0.159	0.199	1
Rcl1	0.00937141	0.0595388	0.148	0.116	1
Arl4c	0.00937279	-0.0694627	0.318	0.367	1
Mycbp2	0.00939081	-0.04629	0.784	0.832	1
Skap1	0.0094314	-0.0981473	0.871	0.897	1
Arid5b	0.00946038	-0.083222	0.518	0.565	1
Smim14	0.00948225	-0.069886	0.53	0.581	1
Rap2a	0.00955072	-0.0524779	0.205	0.249	1
Dus1l	0.00962794	0.06475	0.262	0.218	1
Anapc5	0.00963466	0.0554991	0.444	0.395	1
Commd3	0.0096398	0.0909037	0.711	0.683	1
Rtraf	0.00964304	0.0706435	0.914	0.909	1
Lbh	0.00968368	-0.100347	0.517	0.559	1
Eif3j2	0.00976282	0.0617601	0.176	0.142	1
Rpp21	0.00976862	0.070322	0.581	0.539	1
Dtnbp1	0.00977935	-0.0818501	0.414	0.46	1
Il15ra	0.00983967	0.0474669	0.14	0.107	1
Arhgap30	0.00987656	-0.0830867	0.787	0.836	1
Grap	0.00987756	-0.0962253	0.511	0.561	1
Rrp15	0.00987855	0.0683058	0.286	0.242	1
Gm29243	0.00991675	-0.0779798	0.441	0.493	1
Mtx2	0.00992806	0.0620442	0.254	0.215	1
Pnp	0.00995349	0.0818265	0.423	0.383	1
Isca1	0.00995991	0.0668706	0.27	0.227	1
Ints12	0.00998534	-0.0454309	0.113	0.145	1
Mydgf	0.0100366	0.0837288	0.564	0.529	1
mt-Co2	0.0100383	-0.037198	1	1	1
Ppp1r10	0.0100812	-0.0969247	0.368	0.412	1
Cyb561d2	0.0100821	0.0732205	0.294	0.251	1
Tspo	0.010197	0.0696836	0.969	0.965	1
4932438A13Rik	0.0102731	-0.0752037	0.435	0.478	1
Limd1	0.0103247	-0.0655357	0.245	0.284	1
Itln1	0.0103819	0.0502968	0.118	0.088	1
Pigx	0.010396	0.0803167	0.451	0.408	1
Gm9856	0.0104152	0.0480658	0.131	0.099	1
Pycard	0.0104847	0.0835436	0.694	0.661	1
Tbpl1	0.0105652	0.0513492	0.259	0.217	1
2022-03-07	0.0105699	-0.0766044	0.354	0.397	1
Timm8b	0.010573	0.0835654	0.614	0.585	1
Wdr82	0.0107394	-0.0541796	0.224	0.267	1
Glg1	0.0109004	-0.0652436	0.3	0.346	1
Wbp2	0.0109056	-0.0353474	0.257	0.303	1
Rbm22	0.0109695	-0.0639922	0.394	0.446	1
Igbp1	0.0109828	-0.0754086	0.6	0.64	1
Ifnar1	0.0109938	-0.0765781	0.431	0.473	1
Hcls1	0.0109962	-0.0779155	0.729	0.765	1
Itm2c	0.0110211	-0.0951516	0.512	0.55	1
Myl6	0.0110544	0.0366715	0.999	0.998	1
Klrc1	0.0110566	-0.0676183	0.971	0.97	1
Lbr	0.0110824	-0.0638028	0.414	0.471	1
Polr3k	0.0111005	0.0777823	0.529	0.506	1
Rps19bp1	0.0111021	0.0718857	0.283	0.243	1
Gxylt1	0.0111398	-0.0792217	0.318	0.361	1
Tmem55b	0.0111481	-0.0475764	0.152	0.188	1
Prmt1	0.0111565	0.0762784	0.657	0.626	1
Tmem237	0.0111672	0.0388248	0.107	0.079	1
Cops3	0.0112116	0.0563194	0.322	0.277	1
Tnfrsf4	0.0114176	0.112432	0.397	0.357	1
Smu1	0.0114323	-0.0552728	0.359	0.41	1
Yipf5	0.0114813	0.0550197	0.254	0.212	1
Pex11b	0.0115957	0.0420082	0.128	0.096	1
Man1a2	0.011731	0.0762614	0.472	0.425	1
Rex1bd	0.0118476	0.0731604	0.748	0.719	1
Emc6	0.011887	0.0902317	0.621	0.595	1
Stim1	0.0119501	-0.0688301	0.266	0.308	1
Txlng	0.0119563	0.0616547	0.247	0.206	1
Ctps	0.011974	0.0393621	0.1	0.073	1
Esyt2	0.0119919	-0.11109	0.341	0.379	1
Ppp2r1a	0.0120495	-0.0959879	0.411	0.45	1
Ddx56	0.0120648	0.0625276	0.17	0.136	1
Dnajc9	0.0120872	0.0897755	0.673	0.652	1
Rpl35	0.0121138	0.0666453	0.995	0.991	1
Klra7	0.012126	0.148006	0.177	0.145	1
Ptp4a2	0.0121647	-0.0861836	0.876	0.9	1
H2-Q4	0.01222	-0.0781597	0.868	0.893	1
Immt	0.0122228	0.0564854	0.433	0.383	1
Tagln2	0.0122807	0.10655	0.739	0.706	1
Farsb	0.0123011	0.0793586	0.298	0.26	1
Tlk1	0.0123154	-0.0619799	0.321	0.37	1
Rnf11	0.0123522	-0.0463717	0.207	0.247	1
Ctdsp1	0.0123622	-0.0597558	0.175	0.213	1
Mcm6	0.0124132	0.0557192	0.291	0.245	1
Gng5	0.0124888	0.051866	0.962	0.955	1
Ptpa	0.0124913	-0.0500365	0.363	0.417	1
Psmc5	0.0125163	0.0707298	0.644	0.612	1
Ptprc	0.0125183	-0.0631616	0.991	0.998	1
Gldc	0.012519	0.12179	0.438	0.399	1
Fam111a	0.0125484	-0.0731583	0.207	0.245	1
Tnrc6b	0.0126546	-0.0551083	0.503	0.556	1
Srsf1	0.0127498	0.0850506	0.505	0.466	1
Gemin2	0.0128044	0.0613262	0.18	0.146	1
Zmpste24	0.0128232	0.0620547	0.316	0.271	1
Lck	0.0128242	-0.0692103	0.957	0.973	1
Secisbp2l	0.0130349	-0.05652	0.207	0.248	1
Mrrf	0.0130495	0.0469735	0.159	0.125	1
Mrpl21	0.013114	0.0853535	0.557	0.516	1
1600002K03Rik	0.0131306	0.0463111	0.243	0.202	1
Pfdn2	0.0131351	0.0601074	0.683	0.659	1
Hpf1	0.0132258	0.0860932	0.637	0.595	1
Slc1a5	0.0132341	0.0838694	0.477	0.446	1
Nmt2	0.0132388	-0.0482005	0.139	0.174	1
Cox19	0.0132531	0.0622501	0.293	0.253	1
Acads	0.0133049	0.0741476	0.473	0.428	1
Cab39l	0.0133273	-0.0558226	0.26	0.303	1
Sumo3	0.013381	0.0765645	0.415	0.374	1
Tbcel	0.0134176	-0.0459153	0.142	0.177	1
Pycrl	0.0135065	0.0536069	0.218	0.18	1
Ier5l	0.0136557	-0.0410228	0.292	0.343	1
Mitd1	0.0136587	-0.100749	0.331	0.37	1
Tma16	0.0137343	0.0468899	0.218	0.18	1
Atp5a1	0.0137392	0.0868218	0.899	0.901	1
Card11	0.0138268	-0.0416705	0.199	0.239	1
mt-Co1	0.0138602	-0.0639545	1	1	1
Tmem245	0.0139364	-0.0494407	0.108	0.139	1
Tiparp	0.0140071	-0.0468745	0.104	0.134	1
Padi2	0.0140455	-0.0530916	0.126	0.159	1
Klhdc4	0.014096	0.0543615	0.285	0.242	1
Nsa2	0.0141112	-0.0588176	0.971	0.966	1
Fyb	0.0142405	-0.0789283	0.881	0.909	1
Rbmx	0.0142907	0.0590315	0.194	0.159	1
Anxa6	0.0143948	-0.0673606	0.871	0.895	1
Snrpb	0.0144749	0.0679635	0.879	0.874	1
Rcc2	0.0144957	0.0562046	0.273	0.233	1
Fam103a1	0.014499	-0.0640042	0.414	0.464	1
Cdca4	0.0145083	-0.0585796	0.182	0.215	1
Med28	0.0146194	0.0711099	0.682	0.645	1
Bcap31	0.0146213	0.0600369	0.735	0.724	1
Cysltr2	0.0147419	-0.0464231	0.188	0.227	1
Lmnb1	0.0148891	0.0789365	0.328	0.292	1
Apbb1ip	0.0150366	-0.074231	0.49	0.546	1
Mia3	0.0151888	-0.0652687	0.257	0.299	1
Srsf9	0.0152671	0.0854162	0.597	0.578	1
Gm17745	0.0153501	-0.0941357	0.427	0.461	1
Tcf20	0.0153926	-0.0619196	0.167	0.202	1
Ercc5	0.0154511	-0.0497066	0.086	0.113	1
Nudt5	0.0154516	0.0776809	0.483	0.446	1
Gmds	0.0154567	0.0390111	0.249	0.205	1
Mrps28	0.0154593	0.0680772	0.356	0.315	1
Tfrc	0.0155279	0.0607841	0.231	0.193	1
Gramd3	0.0155388	-0.0520411	0.091	0.12	1
Dnajc8	0.0156953	-0.0691518	0.753	0.794	1
Ercc3	0.0157045	-0.035409	0.084	0.113	1
Bcl11b	0.0157532	-0.0659671	0.423	0.465	1
Lnpep	0.0157777	-0.0484688	0.605	0.664	1
Stk11	0.0158093	-0.0714772	0.304	0.341	1
Noc2l	0.0158528	0.0759893	0.285	0.249	1
Gps2	0.0158594	-0.0755227	0.364	0.403	1
Gm44175	0.0159338	-0.0425374	0.094	0.122	1
Tmem11	0.0159653	0.0723149	0.269	0.232	1
Eif1	0.0160295	0.0512193	1	1	1
Arhgdib	0.0161409	0.0527128	0.991	0.991	1
Bcl7c	0.0161546	0.0851135	0.554	0.517	1
Mrps21	0.0161895	0.0753131	0.826	0.796	1
Prkcsh	0.0162962	0.0403482	0.503	0.45	1
Gm11361	0.0163946	-0.063225	0.841	0.873	1
Znhit2	0.016488	0.051607	0.216	0.177	1
Ccni	0.0165338	-0.0822433	0.591	0.624	1
Nr3c1	0.0165418	-0.0469537	0.318	0.363	1
Pnrc1	0.0165796	-0.069357	0.823	0.86	1
Psmd3	0.0166002	0.0734663	0.447	0.407	1
Ripk3	0.0166236	0.0513626	0.244	0.203	1
Dpp4	0.0166517	-0.0557852	0.248	0.293	1
Ikzf4	0.016679	-0.0574523	0.138	0.171	1
Stk40	0.0167543	-0.060597	0.274	0.318	1
Dcun1d5	0.0168487	0.0913118	0.661	0.643	1
Tbc1d20	0.0168554	-0.0535245	0.236	0.274	1
Comt	0.017011	0.0494517	0.406	0.368	1
Usf2	0.0170431	-0.0623656	0.488	0.534	1
Hibch	0.0170492	0.0407729	0.137	0.107	1
Cetn2	0.0170974	-0.0745753	0.683	0.722	1
Setd1b	0.0171928	-0.0560255	0.144	0.176	1
Nsmce4a	0.0171929	0.0725762	0.514	0.478	1
Rps7	0.0171973	0.0296867	1	1	1
Ppp1ca	0.0172737	0.0621801	0.965	0.967	1
Gar1	0.0173209	0.0684727	0.406	0.364	1
Cct3	0.0173316	0.0908826	0.69	0.671	1
Lilrb4a	0.0173382	-0.0653857	0.126	0.156	1
S100a13	0.0174202	0.0559626	0.954	0.955	1
Lockd	0.0174273	-0.0451166	0.174	0.212	1
Snap23	0.0174369	0.0666838	0.254	0.218	1
Bax	0.0175374	0.0773576	0.841	0.812	1
Nfatc1	0.0176872	-0.0634	0.494	0.539	1
Cdk4	0.0176952	0.078	0.601	0.561	1
Odf2	0.0177769	-0.0452756	0.133	0.167	1
Uspl1	0.017777	-0.0433353	0.111	0.142	1
Rpl7a	0.0177913	0.0480918	0.999	0.995	1
Rnf169	0.017853	-0.0356329	0.084	0.112	1
Hmgn2	0.0178848	0.118537	0.473	0.443	1
Pdrg1	0.0179104	0.0895997	0.496	0.457	1
Cap1	0.0180668	-0.0696036	0.851	0.87	1
Gtf2e2	0.0181422	0.0556483	0.372	0.331	1
Psmb9	0.0182346	0.0625359	0.987	0.979	1
Hist1h1d	0.0184182	-0.0768141	0.335	0.372	1
Polr2j	0.018485	0.0773621	0.741	0.708	1
Wisp1	0.0185095	0.040104	0.185	0.15	1
Jmjd1c	0.0185623	-0.0990693	0.488	0.536	1
Rad23a	0.0185641	0.0628465	0.351	0.305	1
Herc2	0.0186632	-0.0479355	0.224	0.262	1
Pan3	0.0187454	-0.0890649	0.267	0.304	1
Plekho2	0.0187995	-0.0544067	0.227	0.268	1
Rab5c	0.0188043	-0.0865881	0.564	0.603	1
Ppp3cc	0.0188202	-0.0736561	0.489	0.529	1
Eci1	0.0188346	0.0756983	0.359	0.321	1
Celf2	0.0188562	-0.0670347	0.853	0.872	1
Luc7l2	0.0188603	-0.0839765	0.928	0.937	1
Comtd1	0.0188721	0.0578389	0.187	0.155	1
Ormdl1	0.0188974	0.0648155	0.403	0.363	1
Nup37	0.0189125	0.0494317	0.143	0.114	1
Ensa	0.0190232	-0.0491102	0.382	0.432	1
Ltb	0.0190329	0.0827075	0.981	0.977	1
Atp5j2	0.0190436	0.051818	0.98	0.984	1
Stat5b	0.0190814	-0.0536738	0.184	0.222	1
Higd1a	0.0191148	0.0898219	0.827	0.821	1
Ppid	0.0191381	0.0827095	0.385	0.352	1
Gfm1	0.0191393	0.0441934	0.148	0.118	1
Lsm14b	0.0191523	-0.0358257	0.078	0.105	1
Inpp5d	0.0192279	-0.0744001	0.315	0.362	1
Apba3	0.0192778	-0.0473164	0.087	0.113	1
Phyh	0.0193176	-0.0714044	0.451	0.49	1
Mrps18b	0.0193918	0.0477289	0.264	0.224	1
Bzw2	0.0195152	0.0533875	0.295	0.258	1
Arap1	0.0195208	-0.0286162	0.086	0.113	1
Uqcrb	0.019556	0.0662562	0.893	0.896	1
Mcm5	0.019591	0.0719436	0.267	0.23	1
Hipk1	0.019622	-0.0576931	0.266	0.305	1
Eno1	0.019729	0.0652067	0.888	0.875	1
Qrfp	0.0197967	0.0526128	0.145	0.115	1
Hist4h4	0.0198004	-0.0507458	0.116	0.146	1
Zbtb20	0.0198591	-0.052896	0.157	0.191	1
Dek	0.0198856	-0.0626052	0.788	0.825	1
Sat1	0.019909	-0.124118	0.638	0.683	1
Mcm2	0.0199123	0.0569692	0.21	0.173	1
2022-03-02	0.0199637	0.0712321	0.521	0.486	1
Bcap29	0.0199844	0.0666974	0.507	0.472	1
Heca	0.0200268	-0.0520919	0.269	0.313	1
Ap1s1	0.0200344	0.0671769	0.41	0.375	1
Gm31597	0.020063	0.0547074	0.213	0.18	1
Atp6v0b	0.0200671	0.0827066	0.722	0.704	1
Zc3hc1	0.0200983	0.0418307	0.132	0.103	1
Mdh2	0.0201056	0.0684317	0.902	0.874	1
Mkln1	0.020169	-0.0360746	0.386	0.443	1
Cd44	0.0202718	-0.0627819	0.421	0.466	1
Tnfaip3	0.0203222	-0.0780971	0.485	0.522	1
Stx4a	0.0203343	-0.0582752	0.315	0.359	1
Trp53	0.0203954	0.0795774	0.598	0.57	1
Etfrf1	0.0204226	0.0526523	0.152	0.122	1
Polr3f	0.0204263	-0.0385423	0.108	0.138	1
Camk4	0.0204835	0.067502	0.623	0.588	1
Akr7a5	0.0204951	0.0429298	0.151	0.12	1
Polr2f	0.0205049	0.072367	0.703	0.676	1
Adprh	0.0205996	-0.0711208	0.389	0.43	1
Tubg1	0.020648	0.0439727	0.136	0.107	1
Tmem199	0.0206541	0.0665533	0.21	0.176	1
Tmbim4	0.0206633	0.0575221	0.562	0.529	1
Tmem57	0.0206749	-0.0353986	0.101	0.131	1
Tmem208	0.0207347	0.075263	0.636	0.606	1
Gpx1	0.0208	0.0908277	0.633	0.606	1
Spata5	0.021026	0.0452223	0.194	0.158	1
Racgap1	0.0210494	-0.0508112	0.114	0.144	1
Ube2v2	0.021111	0.0781379	0.415	0.385	1
Hmgb2	0.0212706	-0.0806712	0.919	0.943	1
Atg12	0.0212742	-0.0585983	0.28	0.319	1
Smad7	0.0213068	-0.0979512	0.408	0.436	1
Pgm3	0.0213242	0.0336048	0.118	0.091	1
Ubl3	0.0214004	-0.0619243	0.397	0.438	1
Tfdp1	0.0214248	0.0410297	0.286	0.246	1
Cetn3	0.0214327	0.0774479	0.559	0.525	1
Rfx7	0.0214486	-0.0764102	0.346	0.384	1
Rpl22	0.0214729	-0.0377203	1	0.998	1
Pcmtd2	0.0214805	-0.0607515	0.184	0.219	1
Gtf2i	0.0215256	-0.0627869	0.277	0.317	1
Cyld	0.0215766	-0.0667523	0.571	0.615	1
Wdr37	0.0216432	-0.0438728	0.096	0.125	1
Prkar1a	0.0216828	-0.0583067	0.867	0.896	1
Rpl32	0.0217218	0.0370324	1	0.998	1
Cox6b1	0.0218149	0.0445011	0.985	0.982	1
Rnf44	0.021848	-0.0631006	0.185	0.219	1
Minos1	0.0219147	0.0577923	0.933	0.937	1
Serinc1	0.0219525	-0.059041	0.423	0.45	1
St6galnac3	0.0220268	-0.0405082	0.084	0.11	1
Rps6kb2	0.022086	0.0352379	0.122	0.093	1
Slc9a3r1	0.0220924	-0.0530397	0.482	0.537	1
Ogt	0.0220928	-0.0921022	0.688	0.722	1
Pdcd6	0.0221033	0.0634214	0.716	0.681	1
Tmem238	0.0221119	0.0538019	0.248	0.21	1
Tmem251	0.0221495	-0.0535638	0.133	0.163	1
Chd8	0.0222087	-0.0686697	0.323	0.359	1
Flt3l	0.0222506	-0.0517238	0.283	0.324	1
Zdhhc20	0.0222639	-0.0650627	0.427	0.468	1
Ppt2	0.0223056	0.0538207	0.201	0.167	1
Cd86	0.0223378	-0.0761157	0.193	0.227	1
Fam96a	0.0224001	0.0917302	0.717	0.711	1
Tm2d2	0.022451	0.0549655	0.248	0.212	1
Cic	0.0225238	-0.0401593	0.16	0.195	1
Yif1a	0.0226633	0.0533937	0.286	0.25	1
Ifi27l2a	0.0226857	0.0649035	0.858	0.833	1
Cox7b	0.0227031	0.0527867	0.961	0.962	1
Timm8a1	0.0227127	0.0598407	0.321	0.285	1
Anapc2	0.0227957	-0.0470943	0.163	0.198	1
Rmnd5a	0.0228106	-0.0320831	0.175	0.211	1
Ctse	0.0229605	-0.0551275	0.273	0.312	1
Gpr65	0.0230557	-0.0694673	0.401	0.44	1
Fis1	0.0231056	0.0552859	0.925	0.937	1
Aifm1	0.023127	0.0409906	0.22	0.183	1
Ncf4	0.0231401	0.0597153	0.825	0.813	1
Gmppb	0.0231626	0.0556597	0.198	0.167	1
Decr1	0.0233172	0.0327107	0.159	0.127	1
Fyn	0.0233322	-0.0676969	0.59	0.631	1
Oxa1l	0.0233833	-0.0534464	0.373	0.421	1
Tomm7	0.023481	-0.0562166	0.964	0.964	1
2022-09-01	0.0235198	0.0635706	0.911	0.897	1
Tbl3	0.0235413	0.0476655	0.127	0.1	1
Dynll1	0.0235907	0.0664823	0.95	0.948	1
Med27	0.0238321	0.0536277	0.181	0.15	1
Plec	0.0238385	-0.0741145	0.319	0.358	1
2022-09-06	0.0238694	-0.0627676	0.67	0.715	1
Mef2d	0.0239007	-0.0310931	0.284	0.325	1
Rps8	0.0239538	0.0383757	1	0.999	1
Atp5k	0.023967	-0.06138	0.861	0.889	1
Ndufb6	0.0240092	0.0684764	0.707	0.666	1
Swap70	0.0240353	-0.0446984	0.077	0.101	1
Relb	0.0241458	-0.0410977	0.205	0.241	1
Lamtor4	0.0241628	0.0838836	0.854	0.851	1
Zfp593	0.0241743	0.0636763	0.348	0.306	1
Slc25a4	0.0243388	0.0747721	0.951	0.942	1
Pcyt2	0.0243415	0.0597776	0.157	0.128	1
Ddt	0.0243454	0.0849885	0.703	0.683	1
Ip6k1	0.0245381	-0.0454592	0.158	0.191	1
Adgrb2	0.0245388	-0.0515767	0.196	0.232	1
Dync1i2	0.0246396	-0.0921629	0.588	0.61	1
Psmg3	0.0246415	0.0515029	0.271	0.235	1
Nipbl	0.0246636	-0.0621583	0.53	0.572	1
Mov10	0.0248184	-0.0414277	0.083	0.107	1
Acp5	0.0248588	-0.047023	0.252	0.291	1
Tuba1b	0.024888	0.107495	0.603	0.584	1
Shc1	0.0249082	-0.0450787	0.14	0.173	1
Tmed3	0.0249988	0.0547874	0.457	0.415	1
2900026A02Rik	0.025014	-0.0814911	0.391	0.435	1
Trnt1	0.0250161	0.0505609	0.383	0.341	1
Fam102a	0.0250272	-0.0758723	0.421	0.456	1
Adssl1	0.0251365	-0.0532449	0.177	0.213	1
Reps1	0.0253621	-0.0457527	0.181	0.215	1
Ndufa13	0.0254949	0.0655761	0.99	0.988	1
Kidins220	0.0255108	-0.0445782	0.236	0.274	1
Galk1	0.0255714	0.0659608	0.384	0.346	1
Plekhj1	0.0256862	0.060013	0.699	0.679	1
Wdr55	0.0258228	0.0515417	0.15	0.121	1
Gm19585	0.0258525	-0.0853953	0.699	0.722	1
Ccnd3	0.0258897	-0.0632005	0.678	0.712	1
Cish	0.0261442	-0.0698924	0.23	0.265	1
Tspan4	0.0261683	0.0401831	0.1	0.076	1
Cdk2ap1	0.0262033	0.0792443	0.555	0.525	1
H2afj	0.0262162	0.0926633	0.81	0.806	1
Zfp451	0.0262348	-0.0420839	0.166	0.2	1
H2-T23	0.0262396	-0.0590993	0.96	0.975	1
Hist1h1c	0.0264672	-0.0953808	0.67	0.682	1
Zbtb38	0.026475	-0.0595402	0.44	0.481	1
Cd48	0.0267367	0.0638388	0.796	0.771	1
Mien1	0.0267608	0.0542563	0.745	0.719	1
G6pc3	0.0269097	0.0450896	0.143	0.115	1
B4galt5	0.0269439	-0.079517	0.301	0.339	1
Pcgf5	0.0271516	-0.0317344	0.196	0.235	1
Numa1	0.0273026	-0.0365616	0.321	0.357	1
Dlat	0.0273404	0.0486762	0.23	0.195	1
Dmac1	0.0273742	0.0487136	0.559	0.528	1
Mpst	0.0274165	-0.0542413	0.289	0.331	1
Sod1	0.0274391	-0.0577648	0.467	0.504	1
Cers4	0.0274936	-0.0651156	0.529	0.57	1
Tmc6	0.0275923	-0.0485956	0.177	0.211	1
Etfb	0.0276098	0.0954775	0.784	0.755	1
Gcsh	0.0276344	0.0555547	0.272	0.235	1
Zfp281	0.027656	-0.0264923	0.092	0.12	1
Pitpnc1	0.0277399	-0.0715055	0.425	0.467	1
Eif4g2	0.0279191	-0.0870307	0.816	0.829	1
a	0.0280121	0.0849669	0.35	0.312	1
Pot1a	0.0280992	-0.0400935	0.092	0.118	1
Mrpl36	0.0282549	0.0612902	0.59	0.552	1
Gpr68	0.0283068	-0.0690101	0.298	0.334	1
2900097C17Rik	0.0283109	-0.0641114	0.293	0.332	1
Sertad1	0.028311	-0.0455537	0.312	0.357	1
Pea15a	0.0284243	-0.0572345	0.15	0.183	1
Taf7	0.0285195	-0.0645209	0.363	0.407	1
Mecr	0.0286058	0.037395	0.126	0.099	1
Atad3a	0.0286519	0.0508413	0.137	0.111	1
Ctr9	0.0287683	-0.0609452	0.191	0.221	1
Blvra	0.0287683	0.053357	0.383	0.347	1
Dxo	0.028792	-0.0334198	0.141	0.173	1
Gm49336	0.0288077	-0.0383074	0.136	0.167	1
Gngt2	0.028829	0.0298562	0.201	0.165	1
Oat	0.0288722	0.0338912	0.102	0.077	1
Mrpl35	0.0288786	0.0433909	0.468	0.425	1
Rnh1	0.0290466	0.0589811	0.723	0.717	1
Hells	0.0290475	0.04412	0.304	0.265	1
Btbd2	0.0290928	0.0360027	0.114	0.089	1
Dus2	0.0293193	0.0492916	0.107	0.084	1
Shmt2	0.029371	0.0550183	0.2	0.17	1
Cops9	0.0296452	-0.0603525	0.82	0.858	1
Cyth2	0.0296483	0.0721298	0.284	0.25	1
Rnf170	0.0296703	-0.0428813	0.11	0.138	1
Hspa8	0.0296787	0.0586365	0.99	0.987	1
Zbtb32	0.0297309	0.0675396	0.638	0.607	1
Arhgap15	0.0298022	-0.087131	0.508	0.546	1
Ppp2r5c	0.02992	-0.0560756	0.459	0.5	1
Ddx46	0.0299647	0.0864647	0.58	0.543	1
Ptrh2	0.029965	0.0610468	0.272	0.239	1
Prdx6	0.0299879	0.0731792	0.867	0.842	1
Eif3m	0.0299938	-0.0541609	0.918	0.92	1
Ankrd12	0.0300934	-0.0963498	0.682	0.7	1
Ptpn5	0.0300985	0.052665	0.154	0.124	1
Arhgef3	0.0301067	-0.0359392	0.078	0.103	1
Mum1	0.0301358	-0.0544183	0.216	0.249	1
Adamts10	0.0301386	0.048825	0.149	0.12	1
Fosb	0.0301418	-0.106471	0.616	0.648	1
Cox4i1	0.0302653	0.0462344	0.997	0.996	1
Pam16	0.0302888	0.0728468	0.603	0.58	1
Bnip1	0.0303601	0.0494481	0.166	0.137	1
Sash3	0.0304583	-0.0693954	0.443	0.474	1
Nek6	0.0304955	0.0392335	0.248	0.213	1
Med13	0.0306061	-0.0419683	0.292	0.335	1
Tdg	0.0307449	0.0459966	0.165	0.135	1
Gps1	0.0307855	0.0698031	0.375	0.339	1
Fam214a	0.0308316	-0.0441815	0.117	0.145	1
Ypel2	0.0308595	-0.0369534	0.088	0.113	1
Scnm1	0.0308841	0.0474722	0.145	0.118	1
Afg3l1	0.0308943	0.054084	0.295	0.26	1
C1d	0.0310391	0.0665077	0.52	0.482	1
Calm3	0.0310554	0.0656263	0.881	0.876	1
2022-03-05	0.0310686	0.0597235	0.459	0.426	1
Actb	0.031095	0.047462	1	1	1
Zmat5	0.0311639	0.0484635	0.455	0.425	1
Pole3	0.0313094	0.036956	0.239	0.203	1
Rrp8	0.031352	0.0546832	0.255	0.219	1
Irf8	0.0313811	0.103387	0.892	0.896	1
Snrpa	0.0313909	0.0607446	0.503	0.469	1
Chmp7	0.0313952	-0.0233002	0.081	0.106	1
Ccdc92	0.0314427	-0.0213421	0.11	0.138	1
Prr5l	0.0314689	-0.0216364	0.075	0.1	1
Ift20	0.0315137	0.0594188	0.688	0.658	1
Zmiz2	0.031535	-0.0397843	0.326	0.371	1
Kcnab2	0.031558	-0.0496513	0.198	0.233	1
Tmem160	0.0317399	0.0844481	0.825	0.821	1
Tada1	0.0317576	-0.0469484	0.11	0.138	1
Cdc37	0.0318537	0.0662038	0.854	0.853	1
Rapgef6	0.0318801	-0.0424444	0.595	0.64	1
Isyna1	0.0319547	0.0718375	0.342	0.308	1
Mrpl54	0.0321804	0.0688379	0.739	0.711	1
Naa38	0.0323128	0.0838565	0.559	0.542	1
Tyms	0.0323395	0.0519695	0.242	0.208	1
Hes6	0.0323691	0.0643044	0.379	0.344	1
Ttc5	0.0323862	-0.0343613	0.378	0.418	1
Wsb2	0.0325504	0.0511185	0.16	0.131	1
Nras	0.0325831	0.0667311	0.499	0.464	1
Ankra2	0.0327222	-0.035384	0.32	0.364	1
Ccdc58	0.0328246	0.0554207	0.2	0.17	1
Lamc1	0.032846	0.0442095	0.127	0.101	1
Mrto4	0.0329015	0.0678469	0.414	0.376	1
Erp29	0.0329119	0.053043	0.861	0.856	1
Wdr20	0.0329158	-0.0376377	0.152	0.183	1
Gosr1	0.0329511	-0.0574703	0.194	0.226	1
Zbtb7a	0.0329972	-0.0564771	0.41	0.446	1
Mt1	0.0330083	0.0781056	0.266	0.229	1
Rpl18a	0.0330166	-0.0292263	1	1	1
Atp5d	0.0330289	0.0435798	0.981	0.985	1
Ppp1r16b	0.0331329	-0.0552924	0.488	0.536	1
Ddx17	0.033205	-0.0384461	0.538	0.579	1
Trim8	0.033345	-0.0575051	0.277	0.314	1
2410004B18Rik	0.0333758	0.0577438	0.23	0.196	1
Slc44a2	0.0334001	-0.0663193	0.503	0.537	1
Cnpy2	0.0335139	0.0883556	0.414	0.38	1
Cbx4	0.0335706	-0.0589116	0.347	0.383	1
Miip	0.0335727	-0.0327022	0.097	0.124	1
Tada3	0.0336421	-0.0520147	0.199	0.231	1
Tbcb	0.0337229	0.0606317	0.571	0.529	1
Trappc2l	0.0337369	0.0609494	0.679	0.647	1
Zcchc18	0.0338278	-0.0261113	0.164	0.197	1
Jdp2	0.0339175	-0.0526279	0.158	0.188	1
Ankfy1	0.0339906	-0.0301613	0.186	0.222	1
Dhx30	0.0340001	-0.0525649	0.202	0.235	1
Arrdc4	0.0340284	-0.0539318	0.102	0.127	1
Grk2	0.0341182	-0.0456103	0.66	0.705	1
Svbp	0.0341232	0.0709963	0.655	0.618	1
Tmem80	0.034194	0.0371915	0.143	0.116	1
Eif3b	0.034241	0.0783755	0.436	0.402	1
Gsto1	0.0343521	0.0546416	0.221	0.189	1
Aimp2	0.0343557	0.0664689	0.264	0.233	1
Stk16	0.0343762	-0.0442027	0.28	0.318	1
Gtpbp4	0.0344011	0.0817127	0.518	0.484	1
9930111J21Rik2	0.0346252	-0.0685961	0.389	0.432	1
Mnt	0.0346616	-0.0372437	0.094	0.119	1
Neb	0.0346981	0.0447291	0.155	0.126	1
Fam136a	0.0347144	0.0654323	0.242	0.211	1
Gpbp1	0.0347884	-0.062163	0.497	0.53	1
Ier5	0.0348579	-0.0895863	0.609	0.647	1
Sf3b5	0.0348865	0.0567961	0.815	0.774	1
Calhm2	0.0348875	-0.0391054	0.098	0.124	1
Lrrk1	0.0349064	-0.0416166	0.277	0.314	1
Vezf1	0.0349069	-0.0334603	0.219	0.253	1
Impdh2	0.0349165	0.0535894	0.429	0.385	1
Rad21	0.0349608	-0.0713396	0.351	0.39	1
Anapc4	0.0350347	0.0599359	0.231	0.198	1
Epc2	0.0351123	-0.0479181	0.227	0.259	1
Exoc5	0.0351712	-0.0468989	0.308	0.346	1
Hnrnpdl	0.0351866	0.0837398	0.641	0.615	1
Dhrs7b	0.0351967	0.0366279	0.145	0.116	1
Hexim1	0.035244	-0.0488648	0.145	0.174	1
Rabggtb	0.0353259	0.0817378	0.336	0.306	1
Mtch1	0.0353368	0.0620576	0.488	0.461	1
St14	0.0355049	-0.0341907	0.133	0.163	1
Tprgl	0.0355447	-0.0627535	0.606	0.637	1
Atp6v1f	0.0355664	0.0488901	0.955	0.949	1
Tpi1	0.0357684	0.109386	0.908	0.882	1
Snx3	0.0358757	0.0574346	0.777	0.766	1
Zbtb11	0.0359441	0.0503718	0.181	0.152	1
Polr3h	0.0366	0.036191	0.142	0.115	1
Mthfd1	0.036649	0.0263902	0.123	0.097	1
Syce2	0.0366634	0.0490071	0.159	0.131	1
Pofut1	0.0366697	-0.042792	0.087	0.111	1
Coq9	0.0368207	0.0468153	0.19	0.159	1
Ctdsp2	0.0368471	-0.0270042	0.098	0.125	1
Gipc1	0.0369656	0.0474092	0.192	0.163	1
Tmem183a	0.0370558	0.0647111	0.202	0.173	1
Tnik	0.0371453	-0.0570219	0.207	0.242	1
Adgre5	0.0372837	-0.0785856	0.494	0.529	1
Sumo2	0.037351	0.049165	0.964	0.97	1
Dusp19	0.0375967	0.0393875	0.232	0.197	1
Lcmt1	0.0376186	-0.0377448	0.29	0.332	1
Fxr1	0.0376234	-0.0588383	0.464	0.502	1
Trmt11	0.0376415	0.0348261	0.115	0.09	1
Arel1	0.0377206	-0.0472622	0.105	0.129	1
Zfand3	0.0377276	-0.0554326	0.196	0.227	1
Larp1b	0.0377423	0.053557	0.174	0.145	1
Ahsa2	0.0377586	0.0643748	0.321	0.289	1
Timm10	0.0377602	0.0588592	0.272	0.242	1
Tmsb10	0.0379007	-0.0473189	0.999	0.999	1
Ppp3cb	0.0380744	-0.0522888	0.438	0.478	1
Smarca4	0.038154	-0.0661264	0.301	0.332	1
Zfp84	0.038162	-0.0329914	0.086	0.11	1
Tmbim6	0.0382472	-0.0649813	0.899	0.923	1
Tm2d1	0.0383095	0.042008	0.404	0.365	1
Cnot2	0.038321	-0.0597124	0.251	0.281	1
Agap2	0.0383256	-0.0299032	0.086	0.11	1
Pnpla7	0.0385011	0.0253295	0.111	0.087	1
Vps29	0.0385489	0.0599617	0.757	0.751	1
Xlr4b	0.0385962	0.0572587	0.376	0.339	1
Cd53	0.0386294	-0.0636676	0.804	0.83	1
Gm33104	0.0386513	-0.0393901	0.104	0.13	1
Icos	0.0386668	0.0832317	0.386	0.352	1
Cox7c	0.0387449	-0.0509961	0.989	0.991	1
Eno3	0.0388062	0.0808485	0.561	0.52	1
Wtap	0.0388326	-0.0490256	0.367	0.398	1
Sympk	0.0389321	-0.0145938	0.141	0.173	1
Ost4	0.0390015	0.0509772	0.937	0.942	1
Rrp9	0.0390552	0.0504956	0.224	0.192	1
Camk2g	0.0392208	-0.0589838	0.345	0.382	1
Alg5	0.0393678	0.0531809	0.511	0.476	1
Arid4b	0.0393991	-0.088289	0.493	0.517	1
Cpsf3	0.0394007	0.0449074	0.199	0.17	1
Cnih4	0.0395132	0.0570711	0.335	0.299	1
Vdac1	0.0395522	0.0549364	0.554	0.521	1
Phf23	0.0396225	-0.0468171	0.162	0.191	1
Ezr	0.039767	0.0363326	0.796	0.769	1
Ddx6	0.0398678	-0.0744688	0.555	0.58	1
Vapb	0.0398981	-0.0636037	0.358	0.387	1
Stam2	0.0400135	0.0481121	0.174	0.147	1
Bcl10	0.0400403	-0.0710367	0.415	0.45	1
Dph5	0.0400482	0.033964	0.158	0.13	1
Med8	0.0401152	0.0675052	0.378	0.345	1
Plbd2	0.0401175	-0.0309759	0.157	0.188	1
Slfn8	0.0402676	-0.0679183	0.23	0.264	1
Lcp2	0.0403543	-0.0649337	0.549	0.586	1
Uxt	0.0404305	0.0514737	0.214	0.185	1
Ppp1cb	0.0404358	-0.0489641	0.43	0.471	1
Bin2	0.0405255	-0.0620952	0.638	0.675	1
Itk	0.040541	-0.0663212	0.622	0.658	1
Fbxl12	0.0407119	-0.0521718	0.209	0.239	1
Elk4	0.0407209	-0.0643742	0.189	0.217	1
Klre1	0.0407262	-0.055794	0.828	0.848	1
Bad	0.0407269	0.0490283	0.302	0.266	1
Birc2	0.0409324	-0.072396	0.612	0.64	1
Rnpc3	0.0409901	-0.0523351	0.212	0.246	1
Parvg	0.0411186	-0.0615043	0.336	0.36	1
Klrc2	0.0412086	-0.0590423	0.906	0.917	1
Slc22a15	0.0414867	-0.0431137	0.228	0.263	1
Fxyd5	0.0414876	-0.0522752	0.999	0.998	1
Fundc1	0.0416755	0.0558138	0.23	0.199	1
Hira	0.0416841	0.042116	0.131	0.106	1
2300009A05Rik	0.0416968	-0.03529	0.204	0.236	1
Klrd1	0.0416986	-0.0524363	0.98	0.977	1
Rabep1	0.0417786	0.0868418	0.438	0.409	1
Jak2	0.0417819	-0.0621813	0.142	0.169	1
Zbtb8os	0.0418965	0.0757731	0.643	0.632	1
Taf1d	0.0421279	-0.0618576	0.579	0.621	1
2010107E04Rik	0.0422619	-0.0634427	0.916	0.916	1
Gabarapl2	0.0423203	0.0674063	0.797	0.792	1
Chmp1b	0.04242	-0.0514402	0.216	0.249	1
Polr1d	0.0425631	0.0581454	0.911	0.909	1
Rgl2	0.0426422	-0.0520811	0.097	0.12	1
Timm22	0.0428597	0.0526647	0.281	0.248	1
Akna	0.0429368	-0.0623945	0.526	0.571	1
Psmd9	0.0429423	0.0629201	0.336	0.299	1
Add3	0.0429946	-0.054603	0.435	0.474	1
Clk4	0.0430706	-0.0729145	0.32	0.353	1
Ehd1	0.0430808	0.0499405	0.529	0.486	1
Zbtb4	0.0431556	-0.0472802	0.087	0.11	1
Rps26	0.0435823	-0.0410214	0.999	0.999	1
Pml	0.0437476	-0.057875	0.175	0.204	1
Pcmtd1	0.0439781	-0.0572087	0.428	0.464	1
Sla	0.0440298	-0.0794043	0.41	0.44	1
Mlx	0.0441563	0.042221	0.391	0.353	1
Ndfip1	0.0441707	0.0423412	0.727	0.695	1
R3hdm4	0.0443697	-0.0434624	0.479	0.52	1
Nmral1	0.044633	-0.0167696	0.119	0.147	1
Otulin	0.0446351	-0.0550032	0.582	0.619	1
Eed	0.0448239	0.040297	0.291	0.256	1
Ndufs5	0.0449125	0.0567437	0.822	0.817	1
Pyurf	0.044966	0.0572591	0.299	0.266	1
Bckdk	0.0452101	0.0412508	0.171	0.143	1
Arl3	0.0454796	0.0560855	0.28	0.249	1
Cnst	0.0455592	-0.0294577	0.082	0.104	1
Ccdc50	0.0456759	0.0473835	0.711	0.7	1
Itga4	0.0456853	-0.0440653	0.812	0.855	1
Mtpap	0.0459189	-0.0225111	0.145	0.174	1
AC160336.1	0.045926	-0.0433181	0.084	0.106	1
Clpp	0.0460054	0.0547797	0.21	0.184	1
Nup88	0.0461748	0.0363994	0.224	0.189	1
Eif3a	0.0462503	0.0670624	0.793	0.789	1
Ube2v1	0.0462971	-0.0447182	0.087	0.109	1
Rala	0.0464108	0.0661582	0.468	0.441	1
Lsm1	0.0467144	0.0653156	0.488	0.457	1
AL590144.2	0.0467862	-0.0459505	0.249	0.285	1
Polr2m	0.0468017	-0.0471665	0.503	0.536	1
Arap2	0.046885	-0.0313455	0.311	0.351	1
Nfat5	0.0470534	-0.072973	0.49	0.54	1
Gls	0.0470854	-0.062898	0.682	0.708	1
Kpna6	0.0471756	-0.027103	0.093	0.116	1
Rnf10	0.0471803	-0.0701452	0.461	0.504	1
Dynll2	0.047231	0.0535133	0.43	0.394	1
Dctn1	0.0472799	-0.0360738	0.148	0.177	1
Endog	0.0472835	0.0319887	0.113	0.089	1
Ccdc124	0.0473298	0.0649396	0.595	0.561	1
Cnot6l	0.0473919	-0.0647346	0.586	0.632	1
Rnaseh1	0.047426	0.0262934	0.195	0.164	1
Pianp	0.0475703	-0.0663837	0.252	0.285	1
Hnrnpa2b1	0.0475919	-0.0501488	0.981	0.986	1
Hip1	0.0476898	-0.0846274	0.409	0.446	1
Fos	0.0478003	-0.144244	0.323	0.35	1
Pkn2	0.0478381	-0.0550282	0.416	0.452	1
Baz1b	0.0479774	-0.0552271	0.371	0.41	1
Jade1	0.0480717	-0.0509542	0.107	0.131	1
Mmgt2	0.0481712	0.0523394	0.274	0.242	1
Ykt6	0.0481762	0.0352119	0.204	0.173	1
Kif21b	0.0485803	-0.0626464	0.211	0.239	1
Zmym2	0.0487398	-0.0343105	0.092	0.115	1
2310031A07Rik	0.0488007	0.0731581	0.186	0.159	1
Gin1	0.0488347	0.0509931	0.168	0.142	1
Las1l	0.0489974	0.0569932	0.238	0.208	1
Gm49207	0.0490493	-0.032479	0.082	0.103	1
Ube2j2	0.0490587	0.0626964	0.544	0.514	1
Epn1	0.0491095	-0.0341032	0.312	0.353	1
Rap1gds1	0.0491961	-0.0400827	0.17	0.2	1
Dgka	0.0492974	-0.0562993	0.216	0.244	1
Utp3	0.0493455	0.057962	0.454	0.418	1
Nt5c	0.0494075	0.0681979	0.769	0.747	1
Casp3	0.0496486	0.0591849	0.869	0.857	1
Fnbp4	0.0496554	0.0361781	0.29	0.256	1
Sgk1	0.0496795	-0.0606071	0.145	0.174	1
Yeats4	0.0497098	0.0509621	0.412	0.374	1
Ifi214	0.0498227	-0.107315	0.415	0.443	1
Nop58	0.0502795	0.0694577	0.551	0.529	1
Orai2	0.0506028	-0.0333615	0.122	0.149	1
Sod2	0.0507	0.054206	0.435	0.403	1
Hhex	0.0507151	0.0190835	0.104	0.082	1
Kdelr2	0.0507503	0.0566395	0.524	0.493	1
Cd80	0.050923	0.0269087	0.101	0.079	1
Rps11	0.0509407	0.0224852	1	0.999	1
Gpr160	0.0509709	-0.0370122	0.165	0.194	1
Golm1	0.0509749	-0.0317546	0.116	0.141	1
Rbm5	0.0510049	-0.0601725	0.465	0.495	1
Mrps11	0.0510842	0.0365683	0.336	0.295	1
Ncstn	0.0511734	-0.0302694	0.13	0.156	1
Gm12840	0.0512855	-0.0498774	0.191	0.222	1
Erp44	0.0513604	0.0570822	0.647	0.612	1
Eif3h	0.0514056	0.0499644	0.998	0.994	1
Bcl9l	0.0514497	-0.026403	0.079	0.101	1
Ppp1r3b	0.0517204	-0.0416772	0.275	0.312	1
Slc48a1	0.0518658	0.0408282	0.26	0.228	1
Sdhd	0.0519468	0.0654445	0.576	0.55	1
Ier3	0.0520416	0.0923926	0.313	0.285	1
Esd	0.052045	0.0534462	0.88	0.868	1
Actn1	0.0520531	-0.0555699	0.21	0.241	1
Sptlc2	0.0521399	-0.0477655	0.314	0.343	1
Enpp1	0.0522204	0.0374196	0.126	0.102	1
Vegfb	0.0522449	-0.0573237	0.128	0.152	1
Gusb	0.0523475	0.0431723	0.17	0.145	1
Tradd	0.0523799	0.0327459	0.373	0.337	1
Commd2	0.0524355	0.0657093	0.47	0.441	1
Gdi2	0.0524433	0.0552641	0.872	0.855	1
Nfkbie	0.0524935	0.0463992	0.215	0.184	1
Klhl24	0.0526878	-0.0412814	0.201	0.233	1
Mrpl2	0.0528254	0.0264987	0.279	0.242	1
Phf5a	0.0530476	0.0784247	0.594	0.582	1
Selenof	0.0530773	0.0599776	0.863	0.876	1
Gatad1	0.053186	0.0433414	0.524	0.486	1
Hist1h1b	0.0532384	-0.1664	0.214	0.242	1
Nol12	0.0532497	0.0681927	0.443	0.42	1
Ubac1	0.0535162	0.0388482	0.178	0.15	1
Plekha2	0.0535892	-0.049323	0.38	0.41	1
Ctsz	0.05364	0.0543124	0.136	0.112	1
Epb41l4aos	0.0536798	-0.063984	0.331	0.36	1
Ptpn18	0.0538672	-0.0453344	0.998	0.995	1
Vars	0.0539859	0.0276195	0.294	0.257	1
Glud1	0.0540177	0.0593961	0.718	0.695	1
Akt2	0.0540462	-0.0678561	0.262	0.292	1
Jam2	0.0540824	0.0359984	0.117	0.094	1
Gm30054	0.0540842	-0.0619783	0.173	0.2	1
Kat8	0.0542244	0.0314029	0.119	0.095	1
Rps6ka3	0.0545894	-0.0491118	0.306	0.345	1
Zeb2	0.0547786	-0.0498059	0.366	0.409	1
Rpn2	0.0547992	0.0441489	0.54	0.494	1
Sytl2	0.0548184	-0.045612	0.421	0.463	1
Rest	0.0548618	0.0496524	0.313	0.281	1
Rpl9-ps6	0.0549027	0.0241823	0.249	0.214	1
Klc3	0.0550053	0.0302729	0.104	0.082	1
Sipa1	0.0551007	-0.0447618	0.513	0.546	1
Nop56	0.0551182	0.072265	0.478	0.463	1
Zfp644	0.0554318	-0.0521758	0.465	0.503	1
Stag1	0.0554874	-0.0483492	0.331	0.366	1
Ndrg3	0.0555542	-0.063426	0.174	0.198	1
Gimap5	0.0556208	-0.042906	0.765	0.817	1
Cul5	0.055741	-0.0689886	0.285	0.314	1
Fam129a	0.0558136	-0.0644951	0.201	0.228	1
Nol9	0.0558385	0.0256696	0.113	0.09	1
Galns	0.0560492	-0.00977746	0.107	0.133	1
Idh3a	0.0561364	0.0541309	0.5	0.471	1
Dcaf1	0.0561392	-0.041224	0.178	0.206	1
Tbcd	0.0561758	0.0397817	0.103	0.082	1
Peak1	0.056311	-0.0923144	0.421	0.442	1
Txndc11	0.0565437	0.0442749	0.169	0.143	1
Elf1	0.0565554	-0.063574	0.779	0.812	1
Psmc2	0.0566039	0.0645495	0.586	0.563	1
Atg4d	0.0566408	-0.0471905	0.132	0.156	1
Ube2m	0.0570902	0.0717013	0.63	0.619	1
Tbc1d5	0.0571957	-0.0334847	0.134	0.16	1
Urm1	0.0572239	-0.0288173	0.193	0.224	1
Adprhl2	0.0573348	0.0515016	0.19	0.162	1
Acadl	0.0573481	0.0556055	0.685	0.648	1
Eif2s3x	0.05736	-0.0593679	0.424	0.444	1
Epb41l2	0.0573644	0.0401635	0.116	0.093	1
Ralgapa1	0.0576769	0.0316112	0.224	0.192	1
Tspyl1	0.0576951	-0.0546192	0.236	0.266	1
Slc25a17	0.0577413	0.0453965	0.335	0.301	1
Serpinb9b	0.0579207	-0.0979555	0.246	0.281	1
Aamdc	0.0579869	0.0546549	0.208	0.181	1
Phf8	0.0579894	-0.0402306	0.166	0.193	1
Nedd8	0.0580063	0.0507503	0.937	0.94	1
Upf1	0.0580112	-0.0403018	0.433	0.47	1
Cd69	0.0580302	-0.066102	0.595	0.632	1
Arfgap2	0.0581335	-0.0551449	0.333	0.361	1
Rab18	0.0583616	-0.0399006	0.433	0.468	1
Fkbp4	0.0583644	0.0451953	0.458	0.414	1
Abhd18	0.0584086	-0.030353	0.116	0.142	1
Ilvbl	0.0585773	0.0366247	0.266	0.232	1
Atp6v1e1	0.0586322	-0.0443831	0.497	0.543	1
Cpsf1	0.0587749	0.0358244	0.102	0.081	1
Nlrc5	0.0587809	-0.0464634	0.31	0.344	1
Epsti1	0.0587876	-0.0443952	0.7	0.755	1
Tmem163	0.0588167	0.052451	0.526	0.5	1
Hist1h2ae	0.0591255	-0.0608905	0.224	0.25	1
Gm26699	0.0592204	-0.0543072	0.304	0.341	1
Kars	0.0592243	0.0622419	0.318	0.291	1
Pgk1	0.0592847	0.0616424	0.925	0.905	1
Ddx21	0.0593026	0.0462865	0.59	0.557	1
Tmem126a	0.0593082	0.0568664	0.738	0.713	1
Sf3b4	0.0593277	0.0508311	0.27	0.242	1
Glmp	0.0593381	-0.043994	0.571	0.619	1
Myd88	0.0593651	-0.0263305	0.168	0.197	1
Eif2ak2	0.0593659	0.0335516	0.225	0.194	1
Entpd1	0.059448	0.05393	0.745	0.733	1
Dr1	0.0595076	-0.0468457	0.293	0.324	1
Hspa4l	0.0595187	-0.0340901	0.216	0.246	1
Pmf1	0.0596091	0.0376215	0.169	0.143	1
Ebpl	0.0597154	0.0528367	0.526	0.498	1
Phc2	0.0599137	-0.0514275	0.201	0.228	1
Msmo1	0.0600419	0.0429901	0.169	0.142	1
Cdk19	0.0600515	-0.0314137	0.081	0.102	1
Mt3	0.0601406	-0.02664	0.084	0.105	1
Pfdn5	0.0601491	-0.0337702	0.993	0.987	1
Cdc14a	0.0604613	-0.0441249	0.454	0.49	1
Esco1	0.0605238	-0.0436335	0.295	0.33	1
Pfdn1	0.060531	0.0609811	0.686	0.676	1
Mrpl43	0.0606629	0.0293545	0.637	0.591	1
Phkg2	0.0606866	-0.0343402	0.25	0.28	1
Ankrd10	0.0610164	-0.0242632	0.294	0.332	1
Kat7	0.0611155	-0.0394088	0.188	0.217	1
Sap30l	0.061184	0.0358677	0.421	0.39	1
Dusp11	0.0611857	-0.0659841	0.783	0.814	1
Nat10	0.0612587	0.0243374	0.146	0.121	1
Txk	0.0613157	-0.0768723	0.688	0.716	1
Brap	0.0613889	-0.0258332	0.152	0.181	1
Fth1	0.0614465	0.0531003	0.996	0.996	1
Ppil2	0.0615005	-0.0442391	0.434	0.473	1
Mrpl15	0.0615125	0.0648084	0.55	0.522	1
Rybp	0.0615579	0.0416841	0.15	0.125	1
Hdlbp	0.06164	0.0620638	0.428	0.398	1
Dstn	0.0616641	-0.0395181	0.203	0.232	1
Fgfr1op2	0.0617203	-0.0424202	0.635	0.664	1
Rps12-ps3	0.0617774	0.0631365	0.575	0.539	1
Fam110a	0.0617792	0.0323872	0.112	0.09	1
Thap3	0.0619414	-0.0524148	0.292	0.325	1
Atp2a2	0.0620002	0.0722265	0.368	0.338	1
Mrpl58	0.0620978	0.0652313	0.524	0.501	1
Erg28	0.0621586	0.0638505	0.467	0.44	1
0610012G03Rik	0.0622247	0.0445547	0.515	0.477	1
Prpf19	0.0622329	0.0627158	0.299	0.271	1
Flad1	0.0623395	0.0365507	0.186	0.159	1
Yme1l1	0.0623787	-0.0567254	0.458	0.485	1
Usp50	0.0624493	-0.0419273	0.259	0.29	1
Dis3l2	0.0624878	-0.0338867	0.108	0.131	1
Mrpl16	0.0625977	0.0444035	0.277	0.246	1
Stx17	0.0627889	0.0385118	0.166	0.14	1
Hscb	0.0629424	-0.042032	0.502	0.543	1
Chd9	0.0630405	0.0233329	0.127	0.103	1
Ppat	0.0631911	0.0472076	0.254	0.222	1
Lsm4	0.0632908	0.060718	0.729	0.717	1
Nt5c3b	0.0634817	0.054864	0.444	0.403	1
Znhit1	0.063563	0.0569066	0.435	0.402	1
Dalrd3	0.0636895	0.0377742	0.161	0.135	1
Ap2b1	0.0637393	-0.0564197	0.39	0.422	1
Zmynd19	0.0637808	0.0385294	0.11	0.089	1
Cenpb	0.0638134	-0.0215631	0.256	0.286	1
Pts	0.0639581	0.0566294	0.387	0.353	1
Stk25	0.0639928	0.0158847	0.109	0.086	1
Sh3gl1	0.0639937	-0.0484171	0.219	0.249	1
Olfm1	0.064074	-0.0342965	0.114	0.138	1
Lamp1	0.0640752	-0.0451529	0.444	0.486	1
Parg	0.0641518	-0.0412596	0.221	0.25	1
Tmem229b	0.0643177	-0.0236862	0.097	0.119	1
Pex6	0.0643764	0.0308065	0.136	0.112	1
Psma6	0.0646188	0.0617056	0.728	0.72	1
Pole4	0.0646977	0.0862319	0.597	0.569	1
Atp6v0a2	0.0647661	-0.0506971	0.259	0.288	1
Supt20	0.0648146	-0.0331483	0.441	0.482	1
Ercc1	0.0649746	0.0465572	0.217	0.19	1
Rnf166	0.0650763	-0.059167	0.52	0.55	1
Sh2b1	0.065086	-0.0490939	0.183	0.212	1
Psmd10	0.0651299	0.0581706	0.363	0.335	1
Cwc25	0.0652381	-0.0373713	0.206	0.237	1
Cers6	0.0653073	0.0557954	0.198	0.172	1
Tubgcp2	0.0654434	0.0404795	0.201	0.174	1
Pcsk7	0.0658164	-0.0440927	0.242	0.274	1
Atf2	0.0658274	-0.0331662	0.21	0.238	1
Ostf1	0.0658825	0.0637695	0.945	0.95	1
Tbc1d10a	0.0659525	0.0381431	0.106	0.085	1
Rnasel	0.065962	-0.0471859	0.237	0.267	1
Fmc1	0.0661487	0.0505726	0.344	0.314	1
3830406C13Rik	0.0661887	0.0424774	0.512	0.475	1
Chp1	0.0662114	-0.0651726	0.338	0.366	1
Bub3	0.0662174	0.0577735	0.59	0.552	1
Naa60	0.0662304	-0.0340995	0.108	0.131	1
Ubtf	0.0664872	-0.0521259	0.516	0.551	1
Pabpc1	0.0666154	-0.0419451	0.984	0.987	1
Myo1f	0.0668453	-0.0319978	0.407	0.439	1
Anxa5	0.0670239	0.0838334	0.65	0.639	1
Rad17	0.0671471	-0.0489402	0.183	0.21	1
Ucp2	0.0673554	-0.05005	0.939	0.945	1
AI837181	0.0673639	-0.0397248	0.185	0.21	1
Cox8a	0.067386	0.0238706	0.994	0.996	1
Ech1	0.0674329	0.0350065	0.91	0.91	1
Asb8	0.0674912	-0.038575	0.114	0.137	1
Chmp4b	0.0677202	0.0441569	0.759	0.757	1
Anp32a	0.0677246	-0.0554631	0.763	0.797	1
Mllt6	0.0679366	-0.0473858	0.234	0.261	1
H1f0	0.0681128	-0.0534859	0.132	0.156	1
Srek1ip1	0.0682979	0.0561143	0.317	0.285	1
Tmem234	0.068661	-0.0502784	0.81	0.843	1
Klhl9	0.0688725	-0.0336519	0.145	0.171	1
Arl8a	0.0688844	-0.0229564	0.165	0.194	1
Rsl1d1	0.0689883	0.0699917	0.707	0.69	1
Itch	0.0691167	-0.0738959	0.372	0.403	1
Lax1	0.0691205	-0.0463511	0.273	0.306	1
Map3k7	0.0694459	0.0457937	0.145	0.122	1
Vps13d	0.0695014	-0.0479036	0.135	0.157	1
Dmxl1	0.069778	-0.0384559	0.23	0.261	1
Tubb4b	0.0698317	0.0633625	0.414	0.378	1
Ncoa1	0.0699069	-0.0299316	0.119	0.143	1
Ndufb10	0.0700216	0.0531184	0.861	0.869	1
Chka	0.0701304	-0.0515396	0.163	0.191	1
Eif2s2	0.0702236	-0.0616213	0.918	0.905	1
Slc25a20	0.0702335	-0.0330475	0.117	0.142	1
Sdcbp2	0.0703367	0.0730433	0.443	0.415	1
Cd3d	0.0703993	0.0468688	0.978	0.989	1
Snrk	0.0704462	-0.0523592	0.183	0.206	1
Helz	0.0705612	-0.0366416	0.237	0.27	1
Mepce	0.0708619	-0.0196312	0.131	0.156	1
Mthfs	0.0709213	-0.0301782	0.303	0.337	1
Dot1l	0.0710172	0.012347	0.129	0.106	1
Dvl3	0.0711625	-0.0310532	0.085	0.105	1
Srbd1	0.0712918	0.0459905	0.157	0.134	1
Tmem242	0.071623	-0.0474855	0.24	0.265	1
Ubb	0.0717624	-0.0484143	0.999	1	1
Csrp1	0.0717818	0.0322554	0.336	0.303	1
Mrpl24	0.0719816	0.0783906	0.611	0.595	1
Glipr1	0.0720394	0.0927045	0.635	0.622	1
Mknk1	0.0720608	-0.0298202	0.083	0.103	1
Dlgap4	0.0720646	-0.0254993	0.241	0.273	1
Elavl1	0.0720669	0.0581985	0.544	0.525	1
Isy1	0.0721403	-0.0886473	0.538	0.568	1
Lsm2	0.0722645	0.0665737	0.409	0.385	1
Flii	0.072369	-0.0672902	0.334	0.358	1
2610001J05Rik	0.0723845	-0.05566	0.365	0.389	1
Zcchc8	0.072395	-0.0305	0.194	0.222	1
Nme3	0.0725484	-0.0248075	0.102	0.124	1
Epb41	0.0725855	-0.0537678	0.233	0.26	1
Coro1a	0.0725893	0.0349923	0.999	0.997	1
Rmdn3	0.0727176	-0.0289883	0.082	0.102	1
Ltv1	0.0729023	0.0370645	0.231	0.204	1
Csnk2a1	0.0729137	-0.0557561	0.644	0.675	1
Cactin	0.0729303	0.0264922	0.11	0.089	1
Mcm4	0.0730218	0.0839094	0.283	0.26	1
Cpsf4	0.0731476	0.0353071	0.154	0.13	1
Klk8	0.0731729	0.0665739	0.559	0.53	1
Rpap3	0.0733327	-0.037027	0.11	0.132	1
Brd3	0.0733634	-0.0304866	0.108	0.13	1
Hmgb3	0.0737234	0.0368842	0.186	0.159	1
Tubgcp3	0.0737838	0.0496705	0.108	0.088	1
Eif2d	0.073827	-0.0503253	0.192	0.218	1
Inpp5k	0.0738307	-0.0379288	0.246	0.276	1
Usp20	0.0738336	-0.0347832	0.092	0.112	1
Rsl24d1	0.0739764	0.0555982	0.462	0.432	1
Mcm7	0.0740124	0.0383544	0.185	0.159	1
Rnf7	0.0740644	0.0488326	0.694	0.681	1
9530068E07Rik	0.0744087	0.0421316	0.341	0.309	1
Cd3eap	0.0744863	0.0390181	0.173	0.148	1
Fbxl14	0.0745281	0.0238685	0.235	0.206	1
St8sia4	0.0747371	-0.060919	0.242	0.268	1
Dpm3	0.0747376	-0.0496334	0.662	0.684	1
Kat6a	0.0748981	-0.0299398	0.301	0.332	1
AW549877	0.0750328	-0.0231346	0.087	0.107	1
A430005L14Rik	0.075047	0.0577234	0.288	0.258	1
Cd5	0.0752022	-0.0737882	0.406	0.439	1
Scaf8	0.0752802	-0.042204	0.172	0.199	1
Ppm1m	0.0755897	-0.0173769	0.197	0.228	1
Vdac2	0.0756095	0.0582495	0.878	0.863	1
Tbc1d14	0.075808	-0.0307476	0.132	0.156	1
Il12rb2	0.0758961	0.0379232	0.249	0.22	1
Dhcr7	0.0762397	0.0512902	0.112	0.091	1
Iscu	0.076245	0.0496373	0.423	0.4	1
Nceh1	0.0763462	-0.0340248	0.147	0.172	1
Emsy	0.0764151	-0.0528136	0.196	0.224	1
Kdm5b	0.0764526	-0.0321647	0.136	0.162	1
Eef1akmt1	0.0764724	0.0537082	0.411	0.382	1
Unc119	0.0764905	0.0361825	0.722	0.692	1
Inpp5b	0.076561	-0.0445161	0.242	0.272	1
Dera	0.0765845	0.0539462	0.366	0.335	1
Zzz3	0.0766067	-0.0516167	0.153	0.178	1
Tsta3	0.0766545	0.0514042	0.213	0.188	1
Ptcd2	0.076786	0.0629211	0.327	0.296	1
Rnf114	0.0769696	-0.0160739	0.433	0.483	1
Stt3a	0.0769878	0.0483508	0.408	0.376	1
Cabin1	0.0769944	0.0410784	0.392	0.36	1
Snrnp25	0.0771345	0.0399943	0.353	0.318	1
Arf4	0.077185	-0.0441741	0.864	0.876	1
Ppp3ca	0.0773118	-0.0527191	0.439	0.468	1
Slc35a3	0.0773227	-0.026706	0.12	0.144	1
Evi2	0.0773326	-0.0324465	0.133	0.157	1
Plrg1	0.0773536	0.0251296	0.123	0.101	1
Aspscr1	0.0775524	0.0358762	0.254	0.223	1
Tgoln1	0.0776652	-0.0584896	0.574	0.608	1
Dctn6	0.0776758	-0.051257	0.488	0.534	1
Ptp4a1	0.0780426	-0.0473907	0.317	0.35	1
Thoc2	0.0781373	-0.0757543	0.487	0.515	1
Dapk2	0.0781899	-0.036954	0.474	0.522	1
Brd8	0.0783401	-0.045356	0.268	0.299	1
Ttc39c	0.0785266	0.046541	0.107	0.088	1
Calm2	0.0786348	-0.0435156	0.907	0.919	1
Tmem131	0.0788399	-0.00859945	0.118	0.143	1
Gpr174	0.0790827	-0.0646526	0.452	0.475	1
5430416N02Rik	0.0791387	0.0327609	0.159	0.135	1
Sun2	0.0792789	-0.0448104	0.186	0.211	1
Nelfe	0.0792927	0.0471206	0.296	0.267	1
Lcp1	0.0793662	-0.0485973	0.969	0.975	1
Pop4	0.0794674	-0.0216565	0.109	0.131	1
Dcaf5	0.0797509	-0.0424593	0.163	0.19	1
Rptor	0.0798887	-0.0227803	0.136	0.161	1
Ube3a	0.0799275	0.0351666	0.577	0.533	1
Dcaf13	0.0802239	-0.0500506	0.317	0.344	1
Mrpl11	0.0806053	0.0543508	0.419	0.392	1
Lsm7	0.0806057	0.0682397	0.534	0.513	1
Rpl19	0.080818	0.019641	1	1	1
4921524J17Rik	0.0808943	-0.0374627	0.439	0.479	1
Synj2bp	0.0809527	0.0455241	0.402	0.369	1
Lsm14a	0.0812426	-0.050371	0.387	0.419	1
Ube2c	0.081335	0.0411987	0.13	0.107	1
Smarcc1	0.0815103	0.0561863	0.356	0.326	1
Creld2	0.0815476	0.0593057	0.293	0.271	1
Wdr6	0.0816583	-0.0248927	0.115	0.138	1
Ppp2r2d	0.0816837	-0.0544137	0.296	0.326	1
Selenok	0.0818663	0.0632302	0.9	0.906	1
Casp7	0.0818987	0.0212996	0.174	0.147	1
Zdhhc2	0.0819107	0.060429	0.262	0.24	1
Lyst	0.0819307	0.0597814	0.537	0.511	1
Spast	0.0820377	-0.0184926	0.174	0.202	1
Srpk1	0.0827368	0.0335972	0.563	0.526	1
Stub1	0.0827926	0.0538377	0.403	0.37	1
Bcat1	0.0828283	0.0341449	0.109	0.09	1
Stoml1	0.0828472	0.0326806	0.116	0.096	1
Sfxn1	0.0829021	0.0522924	0.46	0.418	1
Noa1	0.0829809	0.0404751	0.229	0.205	1
Psmd6	0.0830298	0.0443332	0.556	0.539	1
Dgkd	0.0830634	-0.0595099	0.353	0.382	1
Tbc1d2b	0.083095	-0.0404843	0.241	0.27	1
Add1	0.0831187	-0.0582577	0.421	0.449	1
Nufip1	0.0831607	0.0261057	0.218	0.187	1
Fam46a	0.0831618	-0.0346179	0.146	0.17	1
Cisd2	0.0832484	0.057958	0.494	0.471	1
Nck1	0.0835389	-0.0457567	0.258	0.289	1
Emc4	0.0835714	0.0389706	0.447	0.412	1
Ttc3	0.083621	0.0747204	0.391	0.36	1
Tsfm	0.083732	0.0383259	0.322	0.291	1
Rbm10	0.0840263	-0.0304316	0.195	0.22	1
mt-Atp6	0.0840753	-0.0187155	1	1	1
Stat6	0.0841033	-0.0389316	0.251	0.279	1
Phax	0.0842509	0.0353318	0.374	0.337	1
Psat1	0.0843145	0.0542578	0.25	0.224	1
Ndufaf7	0.0845115	0.0263221	0.213	0.185	1
Trappc8	0.0845695	0.0235032	0.172	0.145	1
Scaf11	0.0845869	-0.0228925	0.553	0.596	1
Spg21	0.0849088	0.0660019	0.506	0.482	1
Pelp1	0.0849402	0.0245601	0.101	0.081	1
Crip1	0.0849871	-0.0987522	0.968	0.952	1
Shoc2	0.0850491	-0.0153525	0.188	0.218	1
Myo18a	0.085058	-0.0271592	0.084	0.104	1
Edc4	0.0850771	-0.0243572	0.093	0.113	1
Smco4	0.0851061	0.0557067	0.372	0.343	1
Ube2i	0.0851634	0.0433156	0.889	0.905	1
Dubr	0.0853798	-0.0284886	0.14	0.164	1
Ube2k	0.0856225	0.057939	0.55	0.532	1
Sem1	0.0856951	0.0414683	0.983	0.979	1
Trim11	0.085919	0.0237206	0.142	0.118	1
Plp2	0.0861962	0.0534204	0.661	0.645	1
Paf1	0.0863557	-0.0324015	0.177	0.203	1
Vps13a	0.0863808	-0.0620397	0.529	0.558	1
Rnmt	0.0864152	0.0468196	0.252	0.225	1
Coa3	0.0864705	0.0383258	0.609	0.592	1
Cnih1	0.0864744	0.0646859	0.453	0.423	1
Ube2l3	0.0867311	0.0432218	0.855	0.873	1
Tmem192	0.0867604	0.0465042	0.31	0.28	1
Casp1	0.0867993	-0.0444698	0.293	0.326	1
Elf4	0.0868167	-0.0395823	0.261	0.295	1
Tgs1	0.0869058	0.0242143	0.312	0.28	1
Arpp19	0.0869761	-0.0397064	0.821	0.832	1
Zranb1	0.0870679	-0.028331	0.178	0.202	1
1810022K09Rik	0.0872211	-0.0524881	0.609	0.65	1
Khsrp	0.0874425	0.053171	0.241	0.213	1
Sf3a3	0.0874482	0.062118	0.396	0.368	1
Nudc	0.0874761	0.0512393	0.627	0.622	1
Tmem29	0.0876138	0.0388737	0.213	0.187	1
Cyfip1	0.087669	-0.0395621	0.253	0.283	1
Rbm43	0.0877796	0.0343148	0.205	0.178	1
Gm156	0.0879141	-0.202349	0.413	0.432	1
Gsk3b	0.0879235	-0.0509326	0.55	0.58	1
Gigyf2	0.0879848	-0.0296033	0.214	0.242	1
Xbp1	0.0880514	0.0602437	0.329	0.299	1
Smap2	0.0882867	0.046199	0.685	0.653	1
Gm8369	0.0883279	-0.0688665	0.674	0.705	1
Txnip	0.0885063	-0.0611031	0.389	0.414	1
Tesk1	0.0886166	-0.0322044	0.115	0.138	1
Rnf6	0.0886961	-0.0412648	0.318	0.349	1
Mrps27	0.0887167	0.0251364	0.11	0.09	1
Fbxw2	0.0888304	0.0293709	0.494	0.467	1
Scamp2	0.0888858	0.0526062	0.37	0.342	1
Bst2	0.0892128	0.0524398	0.665	0.64	1
B4galt1	0.089527	-0.0404024	0.31	0.341	1
Ccng2	0.0896481	-0.0320273	0.155	0.179	1
Phrf1	0.0897523	-0.0428647	0.163	0.188	1
Thg1l	0.0898488	0.0322114	0.183	0.159	1
Arhgap1	0.0898801	-0.0349189	0.184	0.21	1
Stx7	0.0899216	0.0294392	0.236	0.207	1
Psmf1	0.0899635	0.0294122	0.195	0.167	1
Stk38	0.0899697	-0.0415808	0.248	0.279	1
Hif1a	0.0899706	-0.082325	0.752	0.78	1
Tsen2	0.090103	0.0233526	0.103	0.084	1
Uck2	0.0901196	0.0211592	0.189	0.163	1
Cyba	0.0901406	0.0430967	0.987	0.988	1
Per1	0.0902293	-0.0376381	0.084	0.102	1
Tbc1d10b	0.090242	-0.0372492	0.153	0.177	1
Fam76b	0.0902688	0.0427505	0.304	0.276	1
Hdhd2	0.090813	-0.0250585	0.18	0.209	1
Dnajb4	0.0908586	-0.0194821	0.11	0.131	1
Phf14	0.0909786	-0.0512045	0.482	0.511	1
Ppt1	0.0910393	-0.0331282	0.348	0.382	1
Slu7	0.0910853	-0.049236	0.308	0.332	1
Pnkp	0.0911527	-0.0211332	0.239	0.272	1
Zfp706	0.0911575	0.0372398	0.73	0.722	1
Pbxip1	0.0913425	-0.0533909	0.439	0.465	1
Rab4b	0.0913877	-0.0260986	0.152	0.176	1
Nqo2	0.091483	0.022314	0.13	0.109	1
Thoc7	0.091734	0.0373101	0.649	0.611	1
Capza2	0.0917364	0.0453072	0.85	0.853	1
Ldb1	0.0917437	-0.0427453	0.292	0.315	1
Wdr95	0.0918059	-0.039003	0.149	0.174	1
Rab12	0.0918312	-0.0170705	0.102	0.124	1
Gbp2	0.0919627	-0.0351312	0.141	0.165	1
Iqgap1	0.092224	-0.0418826	0.839	0.856	1
Gfpt1	0.0922741	-0.0332089	0.322	0.354	1
Mpdu1	0.0924312	0.0549837	0.309	0.285	1
Aurkaip1	0.092509	0.0529819	0.809	0.808	1
Ppp2r5a	0.0927258	-0.0375789	0.519	0.554	1
Magohb	0.0928577	0.0656913	0.483	0.453	1
Oaz2	0.0929195	0.032509	0.111	0.091	1
Smg6	0.0929405	0.0639713	0.341	0.314	1
Vcp	0.0930105	0.0671887	0.673	0.664	1
Klf6	0.0931124	-0.0553934	0.853	0.881	1
Hsd17b10	0.0932823	0.0477166	0.656	0.639	1
Hikeshi	0.0934307	0.0517264	0.519	0.496	1
Tusc3	0.0938217	0.0642956	0.294	0.27	1
Exosc5	0.0939172	0.048513	0.389	0.364	1
Osbpl9	0.0941273	-0.0382058	0.169	0.195	1
Ctu2	0.0941343	0.0392845	0.182	0.157	1
Slirp	0.0943377	-0.0291688	0.494	0.522	1
Hsf1	0.0944123	0.0404324	0.188	0.163	1
Gpr108	0.0944352	-0.0322377	0.196	0.224	1
Skap2	0.0945959	0.0512644	0.203	0.181	1
Gbp9	0.0947367	-0.0330458	0.353	0.389	1
Pdha1	0.0948926	-0.0506837	0.38	0.403	1
Mrps18a	0.0949703	0.0413085	0.387	0.36	1
Znrf1	0.0949819	-0.0297783	0.163	0.188	1
Rbl1	0.0952282	-0.0392889	0.111	0.133	1
Slc25a12	0.0953096	0.0570069	0.192	0.171	1
Fiz1	0.0954696	-0.0120215	0.081	0.101	1
Pdcd10	0.0956293	-0.0483529	0.708	0.757	1
Fdft1	0.0957071	-0.0267387	0.105	0.126	1
Qrich1	0.0957408	-0.0396238	0.19	0.214	1
Ttc37	0.096084	0.0373167	0.169	0.147	1
Lrch3	0.0961644	-0.0319439	0.156	0.179	1
Rpp25l	0.0963316	0.0494395	0.352	0.324	1
Nap1l4	0.0964814	0.0562013	0.531	0.504	1
Lrrc57	0.0965797	0.0333568	0.133	0.111	1
Hspa9	0.0965972	0.0632677	0.438	0.411	1
Atxn7	0.0966177	-0.0351788	0.184	0.207	1
Ube2f	0.096788	0.0474157	0.306	0.283	1
Acox3	0.0968281	0.0271537	0.111	0.091	1
Skiv2l	0.0968674	-0.0224443	0.131	0.156	1
Cdkn2aip	0.0968805	-0.0480459	0.256	0.285	1
Sytl3	0.0968821	0.0684137	0.356	0.328	1
Uba7	0.0971065	-0.0453743	0.125	0.145	1
Cdkn2a	0.0971116	-0.0459004	0.195	0.222	1
Nenf	0.0971171	0.0361281	0.275	0.244	1
Gpr132	0.0971479	0.0212459	0.128	0.107	1
Zdhhc18	0.0972352	-0.0615461	0.764	0.788	1
Sdad1	0.0972689	0.025421	0.206	0.18	1
Cebpzos	0.0973595	0.0406135	0.359	0.328	1
Ino80b	0.0974714	-0.0386461	0.287	0.317	1
Nrip1	0.0974901	-0.0523972	0.377	0.414	1
Igf2r	0.0975588	-0.0450623	0.453	0.477	1
Vapa	0.0978335	0.0360159	0.638	0.62	1
Slc25a36	0.0981865	-0.0419618	0.221	0.248	1
Derl2	0.0982121	0.042196	0.436	0.404	1
Srsf5	0.0983114	-0.0644985	0.937	0.947	1
Ralgapb	0.0983424	-0.0316736	0.113	0.133	1
Tmem161b	0.0985668	-0.0416192	0.13	0.152	1
Sec16a	0.0985859	-0.0426628	0.129	0.149	1
Mysm1	0.0985903	-0.0443709	0.305	0.332	1
Topors	0.0986177	0.0483682	0.236	0.21	1
Hnrnpa1	0.0986354	0.0562148	0.931	0.934	1
Chmp6	0.0988017	0.0417879	0.278	0.252	1
Rpl36al	0.0989398	-0.0237963	0.993	0.995	1
Slc39a7	0.0992201	0.0464122	0.28	0.254	1
Tmem222	0.0994018	0.0276561	0.249	0.219	1
Gng10	0.0994465	-0.0385974	0.216	0.242	1
Gm26853	0.0996834	-0.0476866	0.145	0.169	1
Gtf3c1	0.0998659	0.0388282	0.175	0.153	1
Cib1	0.100019	0.0680369	0.359	0.341	1
Rbms2	0.100023	-0.0406201	0.241	0.266	1
Nisch	0.100087	-0.0391121	0.371	0.407	1
Twistnb	0.100173	0.0373653	0.394	0.364	1
Mthfd2	0.100418	0.0519504	0.361	0.337	1
Cd96	0.100428	-0.035011	0.489	0.531	1
Phpt1	0.10044	-0.0484254	0.175	0.199	1
Agpat5	0.100658	0.0216704	0.166	0.141	1
Meaf6	0.10076	0.0391282	0.255	0.229	1
Gm11127	0.101056	0.0208019	0.207	0.179	1
Atxn7l3	0.101119	0.0447365	0.192	0.169	1
Yipf4	0.101131	-0.0515251	0.441	0.474	1
Arhgap12	0.101153	-0.0177314	0.098	0.119	1
D630039A03Rik	0.101289	-0.0355887	0.132	0.154	1
Pggt1b	0.101427	0.0378308	0.156	0.134	1
Trim28	0.101588	-0.0306465	0.243	0.271	1
Eif3c	0.101689	-0.0518	0.853	0.865	1
2810004N23Rik	0.101827	0.0474	0.343	0.314	1
Xlr4c	0.102082	-0.0341219	0.261	0.289	1
Cd55	0.10217	-0.0542515	0.373	0.407	1
Cmc2	0.102241	0.0215258	0.28	0.247	1
Tmem38b	0.102342	-0.0463219	0.148	0.17	1
Actr1b	0.102573	-0.0331525	0.249	0.278	1
Hmbs	0.102604	0.0345652	0.269	0.242	1
Nab2	0.102641	0.052202	0.265	0.242	1
Orc6	0.102667	0.0437425	0.193	0.17	1
Mkrn2	0.10275	-0.0402335	0.176	0.199	1
H2afv	0.102763	0.0483797	0.705	0.679	1
Sbno2	0.103085	0.031387	0.145	0.124	1
Emc2	0.10327	0.0431381	0.548	0.515	1
Hnrnpk	0.103363	0.0347704	0.959	0.958	1
Gnpnat1	0.103651	0.040008	0.334	0.307	1
Cops7a	0.103716	0.0338675	0.238	0.213	1
Ormdl2	0.103802	0.0399892	0.336	0.309	1
Zc3hav1	0.103819	-0.0610369	0.481	0.513	1
Map2k4	0.104152	0.0270236	0.166	0.142	1
Parl	0.104194	0.0704036	0.346	0.323	1
Apoo	0.104324	0.0209222	0.113	0.094	1
Ddb1	0.104525	0.0337422	0.318	0.289	1
Ngdn	0.104546	-0.0356216	0.358	0.392	1
Slc29a1	0.10461	0.0308116	0.183	0.159	1
Denr	0.104666	0.0384956	0.707	0.68	1
Nol11	0.104692	0.0303292	0.296	0.267	1
Cd47	0.104922	0.043221	0.957	0.963	1
Cnppd1	0.10507	-0.0441597	0.277	0.302	1
Hectd1	0.105213	-0.0327733	0.538	0.582	1
Dkc1	0.10534	0.0577084	0.377	0.349	1
Tmem161a	0.105355	0.0218134	0.14	0.118	1
Rnf19a	0.105366	-0.0107504	0.183	0.212	1
Vrk3	0.105498	-0.0361005	0.263	0.296	1
Atf7ip	0.105661	-0.0559678	0.356	0.388	1
Slc25a28	0.105697	-0.0248519	0.116	0.138	1
Wipf2	0.105821	-0.0248916	0.135	0.158	1
Atg3	0.105838	0.0582848	0.469	0.445	1
Snap47	0.105857	0.0419464	0.142	0.121	1
Osgep	0.105917	0.0402685	0.357	0.331	1
Rnf31	0.106036	-0.0326971	0.116	0.137	1
Sik3	0.10611	0.0281808	0.304	0.272	1
2022-03-02	0.106384	0.0457587	0.611	0.59	1
Eif1ad	0.106534	0.0324635	0.254	0.228	1
Coq7	0.106544	0.0424609	0.119	0.101	1
Tmem109	0.106664	0.0263984	0.166	0.142	1
E2f3	0.107134	0.0352125	0.14	0.12	1
Rap1a	0.107167	0.0384662	0.955	0.964	1
Pik3r1	0.107254	-0.0691411	0.466	0.493	1
Naxd	0.107345	-0.0456557	0.286	0.312	1
Aff4	0.107382	-0.0518005	0.18	0.202	1
Araf	0.107418	-0.044461	0.343	0.368	1
Snf8	0.107426	0.0615629	0.611	0.611	1
Reep3	0.10749	-0.0426343	0.242	0.27	1
[truncated: 4,477 more rows]

## Sheet: Cluster 2
	p_val	avg_log2FC	pct_high	pct.2_low	p_val_adj
Rps28	1.22414e-44	-0.241934	1	1	1.43188e-40
Gm42418	1.30783e-37	-0.318588	1	1	1.52977e-33
Rps21	3.25874e-35	-0.208056	1	1	3.81175e-31
Rps27	1.73124e-34	-0.201096	1	1	2.02503e-30
Rps29	2.24306e-34	-0.177336	1	1	2.62371e-30
Rps27rt	7.45151e-33	-0.375874	0.985	0.991	8.71604e-29
Rpl39	1.31198e-24	-0.144117	1	0.999	1.53463e-20
Rpl38	1.83718e-20	-0.139764	1	1	2.14895e-16
mt-Nd3	2.37815e-19	-0.314573	0.956	0.984	2.78172e-15
Rpl37a	1.28346e-18	-0.125528	1	1	1.50126e-14
Tpt1	2.30545e-17	-0.126859	1	1	2.69669e-13
Trac	2.80393e-17	-0.277493	0.99	0.997	3.27976e-13
mt-Co3	3.24029e-17	-0.187084	1	1	3.79017e-13
Gm11808	4.27666e-17	-0.226148	0.988	0.994	5.00241e-13
Fcer1g	2.75196e-16	0.490326	0.787	0.598	3.21897e-12
Btg1	6.99806e-16	-0.353787	0.962	0.983	8.18563e-12
Rps27a	1.62845e-14	0.104054	1	1	1.9048e-10
Cox5a	2.63274e-14	0.16574	0.998	0.994	3.07952e-10
Rpl18	5.0277e-14	0.114426	1	1	5.8809e-10
Rpl37	8.13826e-14	-0.117872	1	1	9.51932e-10
Rpl13	1.20471e-13	0.104335	1	1	1.40915e-09
Rpl11	1.47984e-13	0.0997819	1	1	1.73097e-09
Rps3a1	2.00848e-13	0.0965774	1	1	2.34932e-09
Rps2	2.36981e-13	0.134707	1	1	2.77197e-09
B2m	8.07933e-13	-0.134256	1	1	9.45039e-09
Rpl9	1.63682e-12	0.0981887	1	1	1.91459e-08
Rpl8	2.1855e-12	0.108358	1	1	2.55638e-08
Crip1	2.216e-12	-0.339644	0.99	0.991	2.59206e-08
Rps4x	3.50419e-12	0.109605	1	1	4.09885e-08
Ppia	5.97804e-12	0.127805	1	1	6.99251e-08
Snrpd1	1.12492e-11	0.168243	0.987	0.986	1.31582e-07
Cd3e	1.84523e-11	-0.183973	0.994	1	2.15836e-07
Ran	5.4245e-11	0.168732	0.998	0.996	6.34504e-07
Hcst	7.17367e-11	-0.225161	0.973	0.984	8.39104e-07
Fgl2	1.11623e-10	-0.281278	0.62	0.752	1.30566e-06
Ndufab1	1.42101e-10	0.183998	0.968	0.961	1.66216e-06
Srsf7	1.84173e-10	0.219288	0.962	0.943	2.15428e-06
Pdcd4	1.86641e-10	-0.239861	0.459	0.595	2.18314e-06
Ftl1	1.99348e-10	0.211903	0.997	0.999	2.33178e-06
Edf1	3.33433e-10	0.153455	0.996	0.996	3.90017e-06
Hspe1	3.82658e-10	0.171914	0.998	0.991	4.47595e-06
Trbc2	4.23058e-10	0.195781	0.998	1	4.94851e-06
Gimap4	4.27382e-10	-0.220517	0.934	0.977	4.99909e-06
Lars2	5.33247e-10	-0.194912	0.836	0.902	6.23739e-06
Rpl15	1.52945e-09	0.0916503	1	1	1.789e-05
Cox5b	1.58609e-09	0.145649	0.997	0.996	1.85525e-05
mt-Nd1	2.27037e-09	-0.173238	1	1	2.65565e-05
Hint1	2.73247e-09	0.129666	0.996	0.997	3.19617e-05
Phb2	4.18022e-09	0.181356	0.968	0.953	4.8896e-05
Wdr89	4.52176e-09	-0.19037	0.988	0.991	5.2891e-05
mt-Nd2	1.25722e-08	-0.156168	1	1	0.000147057
Mrpl12	1.69068e-08	0.181838	0.929	0.9	0.000197759
Actg1	1.94404e-08	0.10803	1	1	0.000227395
Eif5a	3.17461e-08	0.155498	0.998	1	0.000371334
Rpl3	3.44178e-08	0.0876015	1	1	0.000402585
U2af1	4.29625e-08	0.152121	0.952	0.961	0.000502532
Slc16a11	4.68115e-08	0.191211	0.613	0.485	0.000547554
Uba52	5.49336e-08	-0.116177	0.997	0.997	0.000642559
Nabp1	5.85918e-08	-0.243357	0.746	0.821	0.000685348
Ly6c2	6.50807e-08	-0.621806	0.401	0.508	0.000761249
Gimap6	7.29796e-08	-0.171706	0.798	0.89	0.000853643
Mbnl1	7.98391e-08	-0.185822	0.993	0.999	0.000933878
Taf10	9.06489e-08	0.149994	0.985	0.983	0.00106032
Rps3	9.42463e-08	0.0774096	1	1	0.0011024
Upk1a	1.16701e-07	0.112584	0.181	0.089	0.00136505
Rps15	1.31496e-07	-0.122439	1	1	0.00153811
H2afz	1.42419e-07	0.14927	0.998	0.99	0.00166587
Rps11	1.72009e-07	0.0775752	1	1	0.00201199
Atp2b4	1.78214e-07	-0.157212	0.398	0.519	0.00208457
Vps37b	1.80658e-07	-0.193779	0.801	0.877	0.00211316
Chchd2	1.87091e-07	0.0961987	0.997	0.999	0.0021884
Snu13	1.8892e-07	0.1514	0.985	0.966	0.00220979
Rps5	1.90152e-07	0.0804007	1	1	0.00222421
Gm26825	1.95741e-07	-0.231143	0.442	0.562	0.00228959
Nop53	2.15708e-07	-0.166134	0.788	0.865	0.00252313
Atp5g2	2.19191e-07	0.108666	0.998	0.996	0.00256388
Psmb3	2.28677e-07	0.136169	0.988	0.987	0.00267484
Rps10	2.35531e-07	0.072881	0.999	1	0.00275501
Rpl23a	2.38963e-07	-0.12058	1	1	0.00279515
Rpl32	2.4185e-07	0.0822744	1	1	0.00282892
Mrps7	2.69778e-07	0.165444	0.767	0.687	0.0031556
Gimap3	2.83417e-07	-0.212665	0.829	0.888	0.00331513
AY036118	3.19634e-07	-0.162572	0.92	0.945	0.00373875
Ahnak	3.95298e-07	-0.235105	0.775	0.854	0.00462381
Malat1	4.33062e-07	-0.235756	1	1	0.00506552
Cycs	4.47882e-07	0.156041	0.993	0.984	0.00523888
Ccnd2	5.58693e-07	-0.202407	0.652	0.745	0.00653504
Eif3i	6.81838e-07	0.130545	0.982	0.976	0.00797546
Npm1	7.2554e-07	0.122722	1	1	0.00848664
Iqgap1	7.33487e-07	-0.177915	0.909	0.928	0.0085796
Rpl10-ps3	8.07757e-07	-0.157947	0.942	0.954	0.00944833
2010107E04Rik	8.701e-07	-0.129659	0.986	0.971	0.0101776
Srsf3	8.81375e-07	0.115457	0.999	0.994	0.0103094
Rps26	9.27274e-07	-0.0874464	1	1	0.0108463
Rassf5	9.46431e-07	-0.155683	0.612	0.742	0.0110704
Gm10260	1.0141e-06	0.213846	0.883	0.818	0.011862
Sumo2	1.05298e-06	0.10023	0.992	0.993	0.0123168
Gzmb	1.08679e-06	0.343286	0.978	0.95	0.0127122
Cox7c	1.39845e-06	-0.10029	1	0.997	0.0163577
Srm	1.40241e-06	0.144768	0.705	0.63	0.016404
Tsc22d4	1.45801e-06	-0.147774	0.89	0.927	0.0170543
Sssca1	1.47144e-06	0.175039	0.711	0.636	0.0172114
Psmb2	1.49736e-06	0.13211	0.979	0.968	0.0175146
Rpl28	1.51227e-06	0.0705999	1	1	0.017689
Ptbp3	1.71861e-06	-0.169555	0.905	0.941	0.0201025
Ppp1r14b	1.87796e-06	0.13854	0.965	0.941	0.0219665
Psmc4	1.92871e-06	0.138042	0.86	0.846	0.0225601
Fam102a	2.17951e-06	-0.121308	0.371	0.492	0.0254937
Cox7a2l	2.23444e-06	-0.139084	0.965	0.976	0.0261362
Ddx5	2.35623e-06	-0.121046	0.999	1	0.0275608
Timm17a	2.45722e-06	0.139018	0.843	0.792	0.0287421
Psmb5	2.76219e-06	0.131158	0.975	0.96	0.0323093
Ccl4	2.76468e-06	0.396975	0.862	0.808	0.0323384
Ldha	2.88558e-06	0.129911	0.999	1	0.0337526
Dync1i2	3.22096e-06	-0.135388	0.606	0.712	0.0376755
Ptprc	3.83256e-06	-0.178581	0.995	0.996	0.0448295
St3gal6	3.85248e-06	-0.109559	0.218	0.317	0.0450625
Cdk4	4.0436e-06	0.129493	0.929	0.927	0.0472979
Ubc	4.33972e-06	-0.195101	0.647	0.737	0.0507617
Tmsb10	4.45971e-06	-0.102943	1	1	0.0521652
Cmtm7	4.98862e-06	0.169651	0.947	0.931	0.0583519
Sdf2l1	5.22767e-06	0.142339	0.848	0.806	0.0611481
Rnaset2a	5.43564e-06	-0.120694	0.986	0.994	0.0635807
Siva1	5.46252e-06	0.131634	0.924	0.892	0.0638951
Nme1	5.55689e-06	0.115431	0.996	0.994	0.064999
Satb1	5.96687e-06	-0.137266	0.413	0.515	0.0697945
Itgal	6.4723e-06	-0.158224	0.843	0.905	0.0757065
Sec61b	6.47274e-06	0.0910557	0.998	0.994	0.0757116
Ms4a4b	6.49145e-06	-0.151079	0.997	0.997	0.0759305
Nhp2	6.52444e-06	0.139583	0.962	0.945	0.0763164
Mrpl17	6.6249e-06	0.131803	0.787	0.722	0.0774914
Pfn1	7.41229e-06	0.0826833	1	0.999	0.0867016
Gm47283	7.54188e-06	0.12677	0.978	0.977	0.0882174
Stk10	8.61462e-06	-0.0948214	0.269	0.374	0.100765
Dbi	8.6503e-06	0.140935	0.95	0.945	0.101183
Txnl4a	8.98605e-06	0.129807	0.876	0.839	0.10511
Acp1	9.36672e-06	0.116923	0.693	0.626	0.109562
Ddx39	9.48649e-06	0.141602	0.858	0.826	0.110963
Tln1	9.50308e-06	-0.165292	0.931	0.97	0.111158
Rc3h1	9.66789e-06	-0.0930063	0.234	0.331	0.113085
Arhgef1	9.69146e-06	-0.14467	0.759	0.832	0.113361
Tmem14c	9.73635e-06	0.131456	0.953	0.935	0.113886
Rps15a	9.92651e-06	0.0692936	1	1	0.11611
Mrpl18	1.00287e-05	0.121909	0.964	0.956	0.117305
Mrps14	1.0057e-05	0.10555	0.98	0.968	0.117637
C1qbp	1.11639e-05	0.122074	0.943	0.927	0.130585
Tnfrsf1b	1.18108e-05	-0.110338	0.39	0.494	0.138151
Ndufa4	1.36029e-05	0.115716	0.995	0.99	0.159113
Bcl2	1.38297e-05	-0.218275	0.814	0.874	0.161767
Msl2	1.43763e-05	-0.0899708	0.25	0.352	0.168159
Anp32b	1.45344e-05	0.118979	0.996	0.999	0.170009
Ndufa3	1.52754e-05	-0.119454	0.918	0.944	0.178677
Erh	1.53826e-05	0.170495	0.885	0.884	0.17993
Zfp706	1.61203e-05	0.11771	0.919	0.908	0.188559
Cd8b1	1.62383e-05	-0.142007	0.99	0.993	0.189939
Pam16	1.66004e-05	0.12689	0.796	0.729	0.194175
Ybx3	1.67596e-05	0.124932	0.991	0.989	0.196037
Diaph1	1.68908e-05	-0.152848	0.826	0.871	0.197572
Gm6169	1.70689e-05	-0.0907109	0.232	0.323	0.199655
Srsf2	1.71298e-05	0.126891	0.981	0.987	0.200368
Fth1	1.74089e-05	0.0958168	0.999	0.999	0.203631
2900060B14Rik	1.89699e-05	-0.0943019	0.109	0.182	0.221891
Rbm39	1.9494e-05	-0.108669	0.996	0.996	0.228022
Ybx1	2.04667e-05	0.0951513	1	1	0.239399
Nucb1	2.14173e-05	-0.133965	0.831	0.898	0.250518
Atp2a3	2.20012e-05	-0.0959485	0.21	0.3	0.257348
2022-09-06	2.34601e-05	-0.136785	0.792	0.849	0.274413
Ndufb5	2.4022e-05	0.130215	0.983	0.96	0.280986
Mrpl20	2.51969e-05	0.126103	0.916	0.905	0.294729
Nrgn	2.57719e-05	0.141176	0.962	0.914	0.301454
Snx20	2.58742e-05	-0.100969	0.276	0.373	0.302651
Klre1	2.58789e-05	-0.173617	0.87	0.91	0.302705
Prf1	2.62096e-05	0.150869	0.984	0.976	0.306574
Lcp1	2.74508e-05	-0.126406	0.997	0.999	0.321092
Rps27l	2.83345e-05	0.0943383	0.99	0.978	0.331428
Cela1	2.83389e-05	-0.0707377	0.079	0.143	0.33148
Psmb6	2.85008e-05	0.116185	0.972	0.968	0.333374
Thg1l	2.92478e-05	0.0917909	0.395	0.297	0.342111
Sesn3	3.00337e-05	-0.0643564	0.178	0.268	0.351305
Eif2s1	3.06407e-05	0.121238	0.953	0.944	0.358405
Ablim1	3.39836e-05	-0.137521	0.641	0.709	0.397506
Lyar	3.44656e-05	0.142403	0.876	0.841	0.403145
Tnfrsf4	3.46653e-05	0.177626	0.601	0.521	0.40548
Chchd1	3.72698e-05	0.127241	0.895	0.862	0.435945
Naca	3.83857e-05	0.075986	0.997	0.999	0.448998
Srprb	3.86833e-05	0.106237	0.358	0.275	0.452478
B230219D22Rik	3.87256e-05	-0.124309	0.562	0.643	0.452974
H2-Q7	3.95489e-05	-0.130473	0.943	0.96	0.462604
Tctex1d2	3.98237e-05	0.147448	0.273	0.191	0.465817
Hspbp1	4.11848e-05	0.145783	0.696	0.621	0.481738
Havcr2	4.22769e-05	0.10232	0.732	0.636	0.494513
Ppp1ca	4.63517e-05	0.104833	0.998	0.994	0.542175
Psmb8	4.67599e-05	0.0770339	1	1	0.54695
Hist1h4d	4.71899e-05	-0.114315	0.596	0.687	0.551981
Arhgef18	4.76094e-05	-0.0445151	0.07	0.131	0.556888
Rpl13a	4.85219e-05	-0.101311	0.991	0.99	0.567561
Dynll1	5.2237e-05	0.129114	0.989	0.987	0.611016
Taf12	5.30569e-05	0.104191	0.701	0.653	0.620607
Ipcef1	5.45364e-05	-0.107342	0.243	0.327	0.637912
Cd2	5.55364e-05	0.14967	0.845	0.792	0.649609
Fyn	6.12854e-05	-0.1349	0.653	0.727	0.716856
Selplg	6.1621e-05	-0.112705	0.942	0.957	0.720781
Zfp398	6.24414e-05	-0.0759608	0.166	0.245	0.730377
Tsix	6.34183e-05	-0.123116	0.26	0.347	0.741804
Mob1a	6.67514e-05	-0.110715	0.677	0.755	0.780791
Timm8a1	7.16157e-05	0.140106	0.775	0.727	0.837688
Ptp4a2	7.16818e-05	-0.131275	0.944	0.947	0.838462
Ets1	7.35756e-05	-0.130831	0.941	0.957	0.860613
Gng10	7.41558e-05	-0.0902808	0.291	0.379	0.867401
Kmt2a	7.41595e-05	-0.149035	0.649	0.737	0.867443
Bcl2l11	7.55139e-05	-0.131573	0.369	0.461	0.883286
Myh9	7.63127e-05	-0.178776	0.944	0.96	0.89263
Brix1	7.78363e-05	0.115685	0.693	0.64	0.910451
Slc38a2	7.97445e-05	-0.218029	0.832	0.864	0.932771
Dctpp1	8.02099e-05	0.137428	0.864	0.813	0.938215
Gm8369	8.08131e-05	-0.119407	0.664	0.756	0.945271
S100a11	8.14324e-05	-0.111549	0.995	0.994	0.952514
Fcho1	8.22112e-05	-0.0687798	0.272	0.367	0.961625
Ccl3	8.26387e-05	0.277386	0.695	0.627	0.966625
Cd53	8.48172e-05	-0.142833	0.807	0.855	0.992106
Gm19585	8.65402e-05	-0.120011	0.711	0.791	1
Anxa6	8.81814e-05	-0.118504	0.953	0.977	1
Rapsn	9.01778e-05	0.121687	0.279	0.205	1
Mgea5	9.11331e-05	-0.086648	0.412	0.511	1
Gm10076	9.27477e-05	0.169108	0.812	0.755	1
Ranbp1	9.77951e-05	0.10371	0.997	0.993	1
Eif4a1	9.83942e-05	0.100469	0.997	0.999	1
Rpl22l1	9.93933e-05	0.100634	1	0.996	1
Slc25a5	0.000108281	0.0921431	0.996	0.99	1
Txk	0.000108431	-0.141286	0.68	0.743	1
Atxn2l	0.000108597	-0.0995557	0.524	0.634	1
Tle4	0.000109432	-0.105683	0.341	0.429	1
Abcb1a	0.000109733	-0.0803306	0.145	0.215	1
Ikzf2	0.000111458	-0.193632	0.523	0.595	1
Rplp2	0.000113284	-0.0524883	1	1	1
Hras	0.000114239	0.11061	0.789	0.772	1
Pyroxd1	0.000116704	-0.0491187	0.089	0.151	1
Tmem71	0.000118913	-0.125819	0.321	0.409	1
Btg2	0.00011962	-0.170743	0.645	0.727	1
Mef2a	0.000124979	-0.126636	0.57	0.654	1
Atp5g1	0.000125085	0.104895	0.981	0.983	1
Tcea1	0.000126023	-0.12356	0.762	0.826	1
Ube2z	0.000126516	-0.0842501	0.232	0.317	1
Senp5	0.000127525	-0.0772825	0.225	0.308	1
Rnf6	0.000129139	-0.103351	0.337	0.42	1
Bola3	0.000129288	0.123772	0.913	0.875	1
Fam136a	0.000133213	0.1167	0.548	0.475	1
Ciapin1	0.00013655	0.113105	0.883	0.872	1
Polr2j	0.000137513	0.103237	0.939	0.901	1
Rpl18a	0.000139081	0.051233	1	1	1
Il2rg	0.000139379	-0.124189	0.823	0.865	1
Ankrd44	0.000139488	-0.1159	0.642	0.726	1
Plec	0.000143696	-0.088958	0.276	0.359	1
Eef1d	0.000146828	0.0878567	0.994	0.993	1
2900097C17Rik	0.00015124	-0.0852236	0.395	0.486	1
Oaz1	0.000151426	0.0743564	1	1	1
Gstp1	0.000152957	0.0958123	0.344	0.26	1
Spata13	0.000157028	-0.0759914	0.252	0.341	1
Timm13	0.000158846	0.104666	0.949	0.95	1
Slc44a2	0.000160382	-0.103745	0.535	0.624	1
mt-Nd5	0.000163144	0.111678	0.964	0.954	1
Polr1d	0.000164677	0.0998083	0.976	0.974	1
Ccr5	0.000165782	-0.103201	0.526	0.621	1
Rpsa	0.000166422	0.0538636	1	1	1
Tab2	0.000169192	-0.112994	0.445	0.548	1
Gbp7	0.000174035	-0.136986	0.754	0.818	1
Cst7	0.000174258	-0.105577	0.969	0.987	1
Eef1e1	0.000180814	0.11585	0.755	0.697	1
Snx14	0.000181313	-0.0475187	0.087	0.146	1
Guk1	0.000189663	0.0967934	0.723	0.648	1
Crim1	0.000190071	-0.0597349	0.092	0.151	1
Prdx2	0.000191801	0.106467	0.914	0.875	1
Grk6	0.000197645	-0.107648	0.481	0.564	1
Ppp4r3b	0.00020675	-0.148315	0.656	0.713	1
Kansl3	0.00020937	-0.0799954	0.257	0.341	1
Slc12a6	0.000209591	-0.0601749	0.121	0.188	1
Akap13	0.000211901	-0.118082	0.916	0.937	1
Gpatch4	0.000213688	0.115028	0.503	0.422	1
Plac8	0.000219077	-0.282088	0.555	0.628	1
Heca	0.000220022	-0.111233	0.258	0.337	1
Pdia6	0.000220317	0.115034	0.958	0.954	1
Tprgl	0.000221565	-0.0959576	0.565	0.66	1
Btf3	0.000226457	0.0721313	0.997	0.994	1
Exosc7	0.000232448	0.10093	0.788	0.758	1
Eno3	0.000233476	0.178972	0.895	0.857	1
Pfdn2	0.000238244	0.0996102	0.892	0.89	1
Cacybp	0.000238387	0.112809	0.94	0.956	1
Rpl5	0.000241819	-0.0826565	1	1	1
Tma7	0.000243757	0.0824334	0.997	0.991	1
Aplp2	0.00024396	-0.115092	0.44	0.532	1
mt-Atp6	0.00025016	-0.0714095	1	1	1
Rpl12	0.000250609	-0.0635673	1	1	1
Rpl29	0.000257439	0.0859528	0.377	0.296	1
Tomm5	0.000259091	0.101814	0.942	0.925	1
Pop5	0.000265377	0.110291	0.923	0.907	1
Ccser2	0.000268383	-0.086851	0.182	0.254	1
Actr2	0.000269884	-0.109534	0.951	0.973	1
Ier5l	0.000271534	-0.135163	0.253	0.333	1
Inpp4b	0.000273412	-0.152775	0.79	0.802	1
Mrpl51	0.000274808	0.102643	0.844	0.809	1
Ptma	0.000277436	0.0691292	1	1	1
Bbx	0.000277881	-0.109196	0.362	0.44	1
Rnaseh2c	0.00028511	0.124286	0.866	0.828	1
Ebna1bp2	0.000290801	0.104848	0.89	0.879	1
Map3k1	0.000294729	-0.0725238	0.294	0.387	1
Runx3	0.000296806	-0.136409	0.904	0.931	1
Bcl2a1d	0.000299537	0.129228	0.944	0.933	1
Hnrnpa2b1	0.000300715	-0.0836418	0.999	1	1
Thy1	0.000311799	-0.102105	0.987	0.993	1
Rack1	0.000312538	-0.0516596	1	1	1
F2r	0.000313018	-0.120917	0.458	0.544	1
Rpl6	0.000321626	-0.0557897	1	1	1
Mrpl43	0.0003232	0.102116	0.784	0.745	1
Ndufb8	0.000326995	0.102946	0.977	0.973	1
Jpx	0.000328639	-0.0424296	0.07	0.122	1
Sin3b	0.000351863	0.100786	0.903	0.89	1
Nrip1	0.000352148	-0.113801	0.434	0.512	1
Emg1	0.000352487	0.106248	0.956	0.95	1
Ifi209	0.000360378	-0.113138	0.365	0.456	1
Mrpl42	0.000362982	0.104974	0.921	0.9	1
Jarid2	0.000363468	-0.129423	0.418	0.505	1
Atf7	0.000364302	-0.0585097	0.163	0.234	1
Lsm2	0.000369896	0.110835	0.818	0.783	1
Hnrnpul1	0.00037836	-0.115502	0.61	0.684	1
Tubb5	0.00037961	0.112398	0.985	0.967	1
Esyt1	0.000380145	-0.102195	0.858	0.904	1
Arhgap30	0.000392459	-0.128662	0.877	0.904	1
Mfsd6	0.000393403	-0.0511193	0.107	0.168	1
Mpc1	0.000396335	0.110374	0.728	0.702	1
Rap1b	0.000401214	-0.104018	0.948	0.95	1
Elf1	0.000407391	-0.127331	0.827	0.884	1
Dennd1c	0.000412325	-0.0700612	0.192	0.265	1
Eef1b2	0.000420618	0.060537	1	1	1
Actn4	0.000427761	-0.0947652	0.773	0.835	1
Cct7	0.000430823	0.0898984	0.97	0.981	1
Rest	0.000439746	-0.114957	0.39	0.462	1
Atf7ip	0.000440077	-0.101428	0.355	0.446	1
Arl6ip4	0.000446413	0.108947	0.753	0.709	1
Cct2	0.000470477	0.0765749	0.969	0.978	1
Camk2g	0.000479314	-0.0892422	0.448	0.529	1
Ppan	0.00048016	0.115051	0.566	0.502	1
Ifi206	0.000482165	-0.0722522	0.177	0.253	1
Atxn3	0.000485077	-0.0598	0.184	0.255	1
Tuba4a	0.000490962	0.116317	0.691	0.646	1
Wdtc1	0.000499035	-0.0627912	0.223	0.301	1
Gm156	0.00051162	-0.219184	0.415	0.492	1
Psmb9	0.000520965	0.0861024	0.995	0.997	1
Anapc13	0.000521296	-0.0970121	0.666	0.739	1
Pak2	0.000522007	-0.0943546	0.903	0.947	1
Rpl14	0.000522651	0.0725689	1	1	1
Ly6e	0.000533902	-0.16409	0.948	0.957	1
Ankrd12	0.000534312	-0.130021	0.707	0.786	1
Pgls	0.00053741	0.106278	0.953	0.956	1
Xist	0.00054122	-0.113545	0.998	0.997	1
Hnrnpab	0.000549981	0.1015	0.979	0.986	1
Psma5	0.000552494	0.0949026	0.96	0.947	1
Abcg1	0.000560866	-0.0605799	0.138	0.204	1
Ifi208	0.000576453	-0.0611757	0.273	0.363	1
Zyx	0.000581319	-0.127912	0.869	0.907	1
Mrps25	0.000581859	0.0931286	0.673	0.636	1
Lilr4b	0.00058557	-0.0273946	0.073	0.125	1
2410015M20Rik	0.000595158	0.101051	0.955	0.944	1
Lockd	0.000595439	-0.114337	0.295	0.363	1
Mrpl44	0.000602095	0.0606818	0.32	0.244	1
Add3	0.000602694	-0.100647	0.495	0.57	1
Calm3	0.000605798	0.0976389	0.974	0.966	1
mt-Co2	0.000610243	-0.0572135	1	1	1
Tox	0.000617113	-0.107795	0.931	0.94	1
Rplp0	0.000618553	0.0520929	1	1	1
Cflar	0.000622173	-0.132193	0.475	0.561	1
Exoc4	0.000631278	-0.0710575	0.322	0.409	1
Ifi203	0.00063502	-0.157832	0.868	0.894	1
Cnn2	0.000643255	-0.0939894	0.981	0.986	1
Gtf2f2	0.000650446	0.103249	0.483	0.419	1
Mgat2	0.000652333	-0.0820377	0.636	0.727	1
Hars	0.000660379	0.106878	0.569	0.502	1
Rps14	0.000662202	0.0530509	1	0.999	1
Tmem229b	0.000670323	-0.0441186	0.148	0.212	1
Trappc2	0.000672448	-0.0543758	0.17	0.241	1
Slc25a24	0.000673335	-0.0745533	0.226	0.298	1
Fmnl1	0.000678272	-0.0964266	0.598	0.674	1
Ccdc117	0.000678855	-0.0526276	0.066	0.112	1
Rapgef1	0.000682145	-0.0705384	0.347	0.435	1
Jak3	0.000712922	-0.0657399	0.319	0.407	1
Ercc6l2	0.000714533	-0.058261	0.153	0.217	1
Snf8	0.000723125	0.10574	0.845	0.834	1
Esyt2	0.000724849	-0.0826955	0.328	0.42	1
Ogt	0.000729184	-0.127176	0.665	0.716	1
Fyb	0.000731082	-0.121059	0.911	0.941	1
Prkcq	0.000754299	-0.0980955	0.501	0.587	1
Eif6	0.000756061	0.0889148	0.892	0.862	1
Utrn	0.000757015	-0.113984	0.358	0.44	1
Fam107b	0.00076656	-0.0963731	0.757	0.825	1
Spc24	0.000774103	0.109128	0.473	0.415	1
Hspd1	0.000794319	0.123203	0.966	0.966	1
Psmd7	0.000799671	0.107463	0.886	0.895	1
mt-Cytb	0.000825087	-0.0838225	1	1	1
Rab4a	0.000829069	0.0568942	0.171	0.113	1
Rab5c	0.00083687	-0.0896579	0.691	0.763	1
Gldc	0.000840722	0.143885	0.528	0.468	1
Gsk3b	0.000873069	-0.113161	0.607	0.679	1
Tapbp	0.000891097	-0.0885913	0.773	0.819	1
Atp6v0e	0.000897717	0.0890968	0.968	0.968	1
Prrc2b	0.000916618	-0.101431	0.46	0.537	1
Fxyd5	0.000917788	-0.0669664	1	1	1
Itgav	0.000917906	-0.134198	0.698	0.74	1
Rad21	0.000919466	-0.103713	0.524	0.595	1
Pin1	0.000920525	0.0961814	0.831	0.819	1
1700097N02Rik	0.000931899	-0.0929871	0.392	0.471	1
Eloc	0.000942798	0.0937703	0.973	0.976	1
Cd52	0.00094307	-0.0834388	1	1	1
Ypel3	0.000947036	-0.0849448	0.321	0.405	1
Srsf6	0.000950118	0.0895652	0.866	0.848	1
Ifng	0.000952128	0.282374	0.905	0.878	1
Neat1	0.000953097	-0.160449	0.451	0.529	1
Txnrd2	0.000963148	0.0701069	0.25	0.187	1
Gimap7	0.000975949	-0.10701	0.963	0.986	1
Dclk2	0.000978033	-0.0508142	0.163	0.232	1
Nek7	0.000978481	-0.0976115	0.538	0.618	1
Rnf167	0.000983522	-0.0748897	0.327	0.407	1
Tomm7	0.000993949	-0.0790602	0.989	0.991	1
Sar1b	0.00100464	0.105152	0.796	0.786	1
Atp5k	0.00100881	-0.0978685	0.961	0.974	1
Macf1	0.0010137	-0.139347	0.749	0.791	1
Commd5	0.00101631	-0.0418586	0.1	0.154	1
Rsl1d1	0.00101843	0.0976169	0.939	0.935	1
Rbmxl1	0.00101981	0.106596	0.811	0.788	1
Mdh2	0.00102609	0.0852964	0.97	0.983	1
Rap1gds1	0.00102748	-0.0853209	0.259	0.334	1
Tcf25	0.00102919	-0.0951538	0.809	0.849	1
Unc119	0.00103225	0.0929254	0.844	0.819	1
Ak6	0.00104394	0.0962221	0.539	0.476	1
Txnip	0.0010515	-0.100973	0.289	0.37	1
Clpp	0.00105371	0.0989897	0.448	0.385	1
Krtcap2	0.0010607	0.0795788	0.995	0.994	1
Nfu1	0.00106241	0.0949439	0.626	0.568	1
Tmem245	0.00107266	-0.0694999	0.185	0.253	1
Snrpd2	0.00109059	0.091535	0.993	0.993	1
Map4	0.00111241	-0.0995406	0.384	0.459	1
Lsm6	0.00111355	0.0944493	0.953	0.943	1
Tomm22	0.00113204	0.101523	0.736	0.697	1
Elk4	0.00113541	-0.0787373	0.192	0.257	1
Clk1	0.0011378	-0.126777	0.7	0.745	1
Rps13	0.00114343	0.0465036	1	1	1
Inpp5f	0.00115099	-0.0439074	0.067	0.112	1
Prr14	0.0011535	-0.0598612	0.198	0.267	1
Sec11c	0.00116218	0.0894978	0.976	0.98	1
Sptan1	0.00118853	-0.104656	0.478	0.562	1
Gm2000	0.00118942	-0.0959664	0.732	0.786	1
Fabp5	0.00121056	0.146106	0.906	0.872	1
Rbm15b	0.00121271	-0.0714266	0.221	0.288	1
Rex1bd	0.00121986	0.1011	0.898	0.871	1
Rnh1	0.00122332	0.0847792	0.862	0.855	1
Bhlhe40	0.00123649	-0.134896	0.663	0.727	1
Eef1g	0.00123716	0.0749264	0.995	0.997	1
Eif2ak3	0.00124993	-0.0411947	0.093	0.143	1
Rpl10a	0.00125338	0.052869	1	1	1
Cyld	0.00126643	-0.108041	0.653	0.719	1
Mob2	0.00128592	0.0780932	0.529	0.473	1
Aars	0.00131867	0.0820852	0.339	0.274	1
Zfp36l2	0.00132083	-0.142357	0.725	0.769	1
Rpl4	0.00132306	-0.0527836	1	1	1
Rpl41	0.00132706	-0.0632279	1	1	1
Sec62	0.00134294	-0.11463	0.873	0.914	1
Dock2	0.00134622	-0.100633	0.747	0.796	1
Ctdsp1	0.00136089	-0.0590005	0.252	0.329	1
Cct8	0.00136623	0.0798295	0.957	0.964	1
Fam172a	0.00137411	-0.0947561	0.421	0.492	1
Msn	0.00138325	-0.107173	0.941	0.961	1
Xpr1	0.00138643	-0.065502	0.255	0.33	1
Ggnbp2	0.00139443	-0.0989516	0.634	0.697	1
Fus	0.00144793	-0.0860669	0.934	0.951	1
Wdr90	0.00145179	-0.0407088	0.059	0.1	1
Zfp652	0.00145386	-0.0852983	0.36	0.439	1
Gm26541	0.00145728	-0.038957	0.067	0.112	1
Dnajc15	0.00145815	0.0955976	0.703	0.664	1
Wnk1	0.00146404	-0.120498	0.932	0.945	1
Pbxip1	0.00146462	-0.0887445	0.358	0.435	1
Sp2	0.00147401	-0.0463538	0.12	0.176	1
Nudcd2	0.00149841	0.0993568	0.77	0.712	1
Ormdl2	0.00150228	0.0699676	0.547	0.489	1
Brpf1	0.00150357	-0.0512876	0.21	0.281	1
Rpl36a-ps1	0.00151045	-0.0987311	0.528	0.591	1
Msi2	0.00151406	-0.125182	0.588	0.667	1
Qtrt1	0.00151465	0.0558506	0.178	0.122	1
Rpl27a	0.00154162	0.044145	1	1	1
Clint1	0.00154236	-0.124623	0.467	0.532	1
Ifngr1	0.00154719	-0.138964	0.665	0.707	1
Nedd8	0.00155057	0.0728998	0.996	0.987	1
Dek	0.00156724	-0.0951044	0.989	0.991	1
C1galt1	0.00158729	-0.0926334	0.458	0.529	1
Usmg5	0.00158982	-0.0952547	0.955	0.961	1
Ube2n	0.00161046	0.0815873	0.865	0.854	1
Becn1	0.00162119	0.0840594	0.616	0.562	1
Shisa5	0.00162194	-0.0906046	0.993	0.993	1
Hnrnph1	0.00162405	-0.111329	0.742	0.799	1
Eif4e3	0.00162775	-0.0692513	0.216	0.284	1
Vav1	0.00166329	-0.0872955	0.357	0.432	1
Rps16	0.00166469	0.0449065	1	1	1
Cdk2ap1	0.0016658	0.0961235	0.875	0.875	1
Rictor	0.00167302	-0.0756112	0.394	0.475	1
Ssbp4	0.00167492	0.103997	0.894	0.891	1
Mindy2	0.00167528	-0.0710946	0.33	0.402	1
Gimap9	0.00168694	-0.0912308	0.578	0.669	1
Pa2g4	0.00170035	0.107048	0.94	0.907	1
Ndufb9	0.00170365	0.0849696	0.98	0.98	1
Adgre5	0.00172822	-0.1272	0.493	0.574	1
Srsf9	0.00176495	0.0823433	0.816	0.816	1
Ssr2	0.00176922	0.0965327	0.929	0.902	1
Kri1	0.00177533	-0.0441303	0.154	0.217	1
Ppp1r15a	0.00177567	-0.0943825	0.524	0.603	1
2310039H08Rik	0.0017781	0.0868678	0.369	0.301	1
Gimap1	0.0017874	-0.101709	0.915	0.954	1
Tob2	0.0018021	-0.0932198	0.342	0.415	1
Rps7	0.00182498	0.0490141	0.999	1	1
Gfer	0.00182666	0.0649081	0.338	0.27	1
Adamts14	0.0018285	0.0799318	0.204	0.151	1
Sf3a3	0.00182906	0.109872	0.72	0.684	1
Erap1	0.00189135	-0.100826	0.544	0.603	1
Yrdc	0.00189538	0.0930405	0.564	0.512	1
Nrn1	0.00189599	-0.176872	0.403	0.481	1
Klrd1	0.00189801	-0.116689	0.992	0.994	1
Gimap8	0.00190405	-0.0866497	0.496	0.577	1
Ric8a	0.00192612	-0.073858	0.305	0.374	1
Rnf11	0.00193139	-0.0714984	0.289	0.36	1
H2-T22	0.001957	-0.0934482	0.861	0.897	1
Acp5	0.00197055	-0.0929239	0.273	0.34	1
Ndufs8	0.0019779	0.0922567	0.841	0.845	1
Pop7	0.00197831	0.0882941	0.592	0.542	1
Aak1	0.00199268	-0.0907917	0.361	0.436	1
Psma3	0.00199623	0.0823964	0.987	0.989	1
Dhrs1	0.00201194	-0.0524128	0.194	0.263	1
Mrto4	0.00202076	0.0872155	0.805	0.783	1
Itm2b	0.00202839	-0.0810038	0.992	0.996	1
Snrpa1	0.00204118	0.0854833	0.921	0.928	1
Anxa2	0.00204727	0.0724733	0.995	0.996	1
Lsp1	0.00207056	-0.0697144	0.993	0.991	1
Slu7	0.00207431	-0.0749361	0.38	0.455	1
Ppwd1	0.00207607	-0.0805564	0.454	0.529	1
Cnot3	0.0020904	-0.0918263	0.652	0.71	1
Gm5914	0.0020924	-0.040096	0.083	0.131	1
Gimap5	0.00209279	-0.111417	0.786	0.842	1
Vps11	0.00209315	-0.0391262	0.062	0.102	1
Dusp16	0.00210463	-0.0467735	0.079	0.125	1
Ndufa13	0.0021168	0.082804	0.999	0.997	1
Hist1h4c	0.00212943	-0.0538772	0.118	0.169	1
Ddx17	0.00213091	-0.110028	0.591	0.66	1
B4galt1	0.00214227	-0.0784406	0.362	0.442	1
Wdr18	0.00215287	0.0965257	0.622	0.552	1
Mrpl30	0.00218382	0.0919892	0.849	0.822	1
Il16	0.00218884	-0.0656586	0.288	0.357	1
Ndufa1	0.00219146	-0.0768495	0.964	0.971	1
Rpl23	0.00219448	0.0409583	1	1	1
Pycard	0.00220046	0.0575999	0.843	0.816	1
Ppil1	0.00220647	0.090736	0.729	0.671	1
Snrk	0.00222258	-0.058893	0.176	0.24	1
Usp10	0.00222681	0.0812387	0.361	0.301	1
Mrpl28	0.00224671	0.098146	0.667	0.623	1
Samsn1	0.00225425	-0.139498	0.916	0.935	1
Wdr12	0.00225937	0.077821	0.521	0.455	1
Snrpg	0.00226587	-0.0671066	0.999	0.99	1
Manf	0.00227995	0.10817	0.969	0.953	1
Stag2	0.0022855	-0.106047	0.577	0.65	1
Hip1	0.00229374	-0.106441	0.473	0.552	1
Crebrf	0.00229378	-0.0662706	0.131	0.184	1
Zfand1	0.00230346	0.0660087	0.25	0.191	1
Calm1	0.00232002	0.0656702	0.999	0.999	1
Dennd1b	0.00234782	-0.100965	0.531	0.608	1
Tmem126a	0.00236136	0.0987025	0.89	0.877	1
Srgap2	0.00237968	-0.0807753	0.293	0.363	1
Tmed1	0.00238169	0.0581868	0.167	0.116	1
Son	0.00238232	-0.0865552	0.958	0.966	1
Csnk1g2	0.00240077	-0.0748156	0.431	0.508	1
Dut	0.00240734	0.0897847	0.999	0.99	1
Cenpv	0.00241046	0.114288	0.496	0.442	1
Armc1	0.00245371	0.0868671	0.586	0.542	1
Dhx34	0.00246657	0.0729378	0.159	0.11	1
Napg	0.00246889	-0.0750454	0.314	0.387	1
Nars	0.00246922	-0.0937323	0.685	0.765	1
Bsg	0.00247724	0.0900638	0.962	0.961	1
Pygo2	0.00248299	-0.0443544	0.067	0.108	1
Chd4	0.00249481	-0.108168	0.812	0.846	1
Bnip2	0.0025255	-0.0914907	0.682	0.753	1
Il21r	0.00255471	-0.0907761	0.35	0.412	1
Hddc2	0.00256704	0.100347	0.621	0.568	1
Crbn	0.00258045	-0.0761119	0.61	0.683	1
Nr2c2	0.00261363	-0.0517067	0.287	0.367	1
Cd84	0.00261769	-0.0903804	0.361	0.425	1
Kdelr2	0.00262403	0.0887619	0.803	0.808	1
Psma2	0.00268222	0.0695099	0.988	0.987	1
Dvl3	0.00269143	-0.0355277	0.095	0.142	1
Setdb1	0.00269499	0.0709711	0.262	0.202	1
Nudc	0.00270283	0.0905512	0.917	0.888	1
Lsm7	0.00270388	0.097438	0.854	0.839	1
Timm9	0.00270897	0.087052	0.623	0.565	1
Ndufa8	0.00273372	0.08331	0.924	0.931	1
Epb41	0.00276009	-0.0567661	0.284	0.357	1
Vcpkmt	0.00277046	-0.0714835	0.367	0.445	1
Hspa8	0.00278658	0.0898055	1	1	1
Evl	0.0027995	-0.0838207	0.593	0.65	1
Nedd4	0.00280789	-0.0909304	0.531	0.605	1
Cnrip1	0.00280972	-0.0373817	0.072	0.115	1
Kif21b	0.00282867	-0.0603321	0.17	0.23	1
Fam53b	0.00284545	-0.0825068	0.227	0.286	1
Gls	0.00284587	-0.0742394	0.81	0.862	1
Lims1	0.00285144	-0.0858915	0.661	0.742	1
Pnrc1	0.00285216	-0.115474	0.809	0.851	1
Zcchc18	0.00287273	-0.0497061	0.145	0.202	1
Mbd3	0.00287766	0.104068	0.763	0.743	1
Polr2c	0.00295394	0.103627	0.793	0.772	1
Stoml2	0.00300357	0.105869	0.732	0.716	1
Tubb4b	0.0030709	0.11942	0.688	0.648	1
Myd88	0.00311484	0.0524123	0.268	0.205	1
Pclaf	0.0031243	0.129242	0.699	0.615	1
Gpr174	0.00314079	-0.0784549	0.439	0.518	1
Chmp3	0.00316468	-0.0667949	0.411	0.494	1
Csnk1g1	0.00318643	-0.0714943	0.273	0.34	1
Nlrc5	0.00323042	-0.0641169	0.328	0.402	1
Rc3h2	0.00324392	-0.0795918	0.323	0.389	1
Mrpl14	0.00325063	0.0877699	0.729	0.704	1
Tspan14	0.00327759	-0.0547828	0.149	0.201	1
Cd200r4	0.00328434	-0.0498424	0.116	0.166	1
AW112010	0.00328724	0.101431	0.999	1	1
Eml3	0.00331688	-0.072225	0.217	0.277	1
Ube2s	0.00331772	0.0988268	0.916	0.921	1
Rpl34	0.00336108	-0.0287058	1	1	1
Uchl3	0.0033635	0.0928372	0.854	0.849	1
Ppa1	0.0033934	0.0868933	0.915	0.888	1
Tubb6	0.00339592	0.0495178	0.146	0.1	1
Laptm5	0.00341393	-0.085711	0.995	0.996	1
Atxn7	0.00349005	-0.0619482	0.233	0.294	1
Lag3	0.00350444	-0.107811	0.934	0.947	1
Trav3-3	0.00357677	-0.05306	0.062	0.102	1
Mrpl35	0.00358207	0.0979189	0.736	0.694	1
Tmem97	0.00358293	0.0631457	0.37	0.307	1
Stmn1	0.00360098	0.118853	0.768	0.71	1
Ifi27l2a	0.00361063	0.151904	0.907	0.868	1
AW554918	0.00361635	-0.0434245	0.086	0.131	1
Cd244	0.00362495	-0.0788491	0.512	0.591	1
Gm31597	0.00362751	0.0849798	0.281	0.221	1
Ly6c1	0.00366301	-0.102236	0.196	0.255	1
D17Wsu92e	0.00366665	-0.0783596	0.354	0.423	1
Herc1	0.00372738	-0.0883113	0.458	0.521	1
Coro1b	0.00373319	-0.0714049	0.606	0.709	1
Hist1h2ap	0.00377629	0.107502	0.342	0.284	1
Stk4	0.00379023	-0.0840189	0.636	0.699	1
Carnmt1	0.00381016	0.0687214	0.558	0.496	1
Neurl3	0.00382162	-0.0576657	0.259	0.32	1
Prmt1	0.00384517	0.0983395	0.927	0.925	1
Txnl1	0.00385083	0.0778329	0.939	0.92	1
Psma4	0.00387731	0.072118	0.988	0.981	1
Ap1s3	0.00387928	-0.0664729	0.255	0.32	1
Slfn8	0.00388089	-0.0733716	0.238	0.308	1
Hip1r	0.00389838	-0.0589721	0.273	0.341	1
Tmem50a	0.00390545	-0.0817309	0.927	0.948	1
Git2	0.00390555	-0.0966324	0.51	0.564	1
Skiv2l	0.00391064	-0.0571035	0.189	0.25	1
Npc2	0.00391715	-0.0830166	0.872	0.927	1
Wipf1	0.00392747	-0.104767	0.689	0.727	1
Xiap	0.0039453	-0.0795619	0.433	0.496	1
Ndc1	0.00400078	0.0293812	0.126	0.08	1
Ppp2r5d	0.00402249	-0.039675	0.132	0.185	1
Rpl19	0.00412258	0.0399342	1	1	1
Utp3	0.00412406	0.0534742	0.707	0.686	1
Zbtb1	0.00415111	-0.0840805	0.372	0.433	1
Usp3	0.0041801	-0.063132	0.447	0.509	1
Pld3	0.00419841	-0.0934287	0.594	0.686	1
Exoc2	0.00421714	-0.0681505	0.283	0.353	1
Slc35a2	0.00421868	-0.0414729	0.126	0.178	1
Med7	0.00422083	0.051021	0.229	0.174	1
Il2	0.00429307	-0.0512676	0.198	0.26	1
Gopc	0.00432248	-0.0506462	0.201	0.255	1
Fnbp1	0.00433655	-0.123715	0.712	0.78	1
Gatad2b	0.00433951	-0.0982854	0.408	0.475	1
Srp19	0.00435292	0.0869901	0.932	0.924	1
Mycbp2	0.00436382	-0.0872976	0.85	0.878	1
Mrpl34	0.00439109	0.0805223	0.817	0.809	1
Slain2	0.00442915	-0.0718648	0.348	0.415	1
Pnpla7	0.00444431	-0.0256832	0.082	0.128	1
Mif	0.00445045	0.0684819	0.998	1	1
Drg1	0.00447128	0.0622637	0.641	0.591	1
Asxl1	0.00447559	-0.0383092	0.186	0.248	1
Kmt2e	0.0044881	-0.0969619	0.687	0.75	1
Exosc3	0.00450011	0.0810241	0.752	0.717	1
Sidt2	0.00450761	-0.076986	0.299	0.359	1
Dnah8	0.00450932	-0.0913657	0.282	0.339	1
Gapdh	0.00452009	0.0641406	1	1	1
Cd6	0.00453231	-0.137504	0.379	0.443	1
Ppp1r11	0.00455002	0.0857054	0.852	0.811	1
Tug1	0.00465719	-0.0754566	0.218	0.277	1
Supt20	0.00467918	-0.0852711	0.45	0.512	1
Cars2	0.00470589	0.0593884	0.304	0.244	1
Flii	0.00473628	-0.104039	0.47	0.521	1
Fbxl5	0.00475242	-0.0607506	0.273	0.336	1
Mrps23	0.00475997	0.0852227	0.594	0.56	1
Lsm3	0.0047842	0.108874	0.777	0.763	1
Zc3h7b	0.00478557	-0.0412897	0.235	0.296	1
Lrr1	0.00478905	0.0363728	0.145	0.099	1
Mrps33	0.00480462	0.0869865	0.911	0.911	1
Dnajc12	0.0048189	-0.0312511	0.064	0.102	1
Zcrb1	0.00487824	0.071642	0.904	0.894	1
Sgo1	0.00489334	0.0428153	0.133	0.089	1
Mrpl21	0.00495486	0.0810969	0.804	0.752	1
Tacc1	0.00497327	-0.0925632	0.758	0.806	1
Rb1	0.00500207	-0.0547528	0.23	0.293	1
Hat1	0.00500625	0.0973606	0.737	0.696	1
Sp3	0.00500629	-0.0757998	0.4	0.478	1
Cyb5r3	0.00503279	-0.0403492	0.251	0.323	1
1110038F14Rik	0.00504058	-0.0655997	0.475	0.547	1
Naa20	0.00509009	0.10327	0.762	0.747	1
Atp5c1	0.00509843	0.0690995	0.999	0.987	1
Mt1	0.00510208	0.243854	0.393	0.337	1
Eif4e	0.00513742	0.0817305	0.757	0.746	1
Galk1	0.00516879	0.0774671	0.721	0.683	1
Arid5a	0.00517575	-0.0536531	0.38	0.459	1
Eef1akmt1	0.00517782	0.0980613	0.608	0.561	1
Baz2a	0.00523368	-0.0712198	0.293	0.357	1
Gde1	0.0052378	0.0823313	0.605	0.585	1
Srgn	0.0052421	-0.0933786	0.985	0.993	1
Ormdl3	0.0052423	-0.0743688	0.251	0.308	1
Gps1	0.00529335	0.0919577	0.659	0.623	1
Trpv2	0.0053014	-0.0663239	0.471	0.549	1
Selenok	0.00530387	0.0830649	0.953	0.954	1
Cdk1	0.00534181	0.0793188	0.442	0.385	1
Mif4gd	0.00540888	0.0739068	0.548	0.479	1
AW549877	0.00541807	-0.0310153	0.076	0.116	1
Gbp4	0.0054293	-0.105804	0.744	0.795	1
Ppp6c	0.00544512	-0.0784089	0.55	0.617	1
Srsf10	0.00548299	0.0824541	0.894	0.869	1
Mterf1a	0.00551576	-0.0446878	0.099	0.142	1
Slamf7	0.00553039	-0.0648503	0.137	0.188	1
A430005L14Rik	0.00555389	0.0892157	0.607	0.557	1
Impad1	0.00556098	-0.0585019	0.284	0.344	1
Malt1	0.00561364	-0.106093	0.522	0.597	1
Uqcc1	0.00561489	0.060308	0.232	0.176	1
Hp1bp3	0.00563479	-0.123118	0.698	0.743	1
Nop16	0.00565116	0.101437	0.545	0.524	1
Farsb	0.00565153	0.0787402	0.549	0.498	1
Pik3r1	0.00565231	-0.0912162	0.483	0.542	1
H2-Q4	0.00568472	-0.0827565	0.905	0.927	1
Tes	0.00568706	-0.0786144	0.817	0.878	1
Timm10b	0.0057222	0.0881174	0.928	0.895	1
Psph	0.0057288	0.0838257	0.716	0.681	1
Pkn1	0.00576557	-0.085776	0.515	0.578	1
Dnajc19	0.00578169	0.0835449	0.861	0.848	1
Bcat1	0.00581171	0.0750853	0.361	0.303	1
Ppid	0.00584099	0.111538	0.772	0.76	1
Tm2d3	0.005931	0.0698658	0.51	0.442	1
Cd164	0.00595273	-0.0853821	0.879	0.898	1
Rgs3	0.0059536	-0.0897489	0.604	0.674	1
Itpkb	0.00597378	-0.0844371	0.421	0.481	1
Entpd1	0.00604372	0.0515367	0.822	0.78	1
Hsp90b1	0.00604892	0.0873142	0.994	0.994	1
Ap2s1	0.00605669	0.0910957	0.924	0.92	1
Zc3h18	0.00607456	-0.0769873	0.481	0.547	1
Gnpda1	0.00611078	0.0769593	0.433	0.385	1
S100a6	0.0061192	-0.170805	0.955	0.951	1
Ppp3cb	0.00612114	-0.078609	0.577	0.673	1
Ssr4	0.00618542	0.0863224	0.978	0.974	1
Gng2	0.00620898	-0.0852654	0.939	0.96	1
Arid4a	0.00623793	-0.0825731	0.418	0.482	1
Mak16	0.00624005	0.0891735	0.615	0.584	1
Errfi1	0.00624115	-0.0665068	0.144	0.192	1
Gtpbp4	0.00624133	0.10948	0.784	0.776	1
Wls	0.00624957	-0.0959085	0.257	0.311	1
Rps8	0.00626008	0.0361431	1	1	1
Tsc22d3	0.00626279	-0.0964109	0.226	0.28	1
Atl3	0.00628575	-0.0574056	0.334	0.403	1
Mrpl49	0.00632075	0.0731083	0.611	0.562	1
Prkacb	0.00632715	-0.0987368	0.533	0.593	1
4932438A13Rik	0.00634766	-0.0911848	0.438	0.508	1
Aff4	0.00637683	-0.0497127	0.172	0.227	1
Epb41l4aos	0.00641686	-0.0708971	0.349	0.41	1
Creld2	0.00643547	0.0696248	0.579	0.521	1
Poldip3	0.0064631	-0.0618259	0.366	0.438	1
Rbx1	0.0064688	0.0589092	0.99	0.987	1
Bag1	0.00649791	0.0699055	0.937	0.943	1
Taf5	0.00650217	0.0459967	0.179	0.132	1
Usp50	0.006505	-0.0828632	0.535	0.597	1
Exosc5	0.00662308	0.0641203	0.711	0.65	1
Srp9	0.00662362	0.0774628	0.956	0.964	1
2310033P09Rik	0.0066515	0.0676636	0.563	0.519	1
Parg	0.00665608	-0.0651435	0.291	0.353	1
Timm17b	0.00666234	0.0750407	0.65	0.603	1
Glrx3	0.00669309	0.0733727	0.925	0.921	1
Stk38l	0.00679334	-0.0331492	0.089	0.131	1
Ccdc124	0.00680706	0.0775729	0.827	0.783	1
Izumo1r	0.00681416	-0.081133	0.132	0.178	1
Susd6	0.00681616	-0.0448919	0.124	0.171	1
Ppp1cc	0.00681866	-0.078786	0.86	0.904	1
Ppp1r9b	0.00686615	-0.0532038	0.146	0.197	1
Rfc4	0.0069178	0.0969096	0.721	0.676	1
Fosb	0.0070427	-0.0914293	0.564	0.623	1
Med11	0.00704762	-0.0504611	0.431	0.511	1
Pik3cd	0.0071695	-0.0614623	0.561	0.64	1
Fryl	0.00723334	-0.0750919	0.295	0.356	1
Ifitm3	0.00725631	0.152095	0.55	0.479	1
Smco4	0.00727412	0.0889972	0.685	0.654	1
Snx4	0.00729831	-0.0530241	0.358	0.43	1
Ugcg	0.00731662	-0.104112	0.943	0.966	1
Rpl27-ps3	0.00733205	0.0812505	0.503	0.452	1
Ndufa2	0.00734548	-0.0699846	0.989	0.991	1
Fgd3	0.00739769	-0.0329134	0.07	0.108	1
Cd200	0.00743581	0.0455907	0.486	0.415	1
Yars2	0.00747306	0.0405351	0.274	0.217	1
Babam1	0.00747429	-0.0475614	0.397	0.472	1
Abi1	0.00748384	-0.0996398	0.549	0.611	1
Tra2b	0.00749185	-0.0965111	0.957	0.967	1
Sgpl1	0.00753154	-0.0482836	0.155	0.205	1
AC160336.1	0.00755322	-0.0662838	0.14	0.189	1
Shmt1	0.00757045	0.0766569	0.412	0.362	1
Psme2	0.0075749	0.0625289	0.989	0.987	1
Orc6	0.00759979	0.0858809	0.778	0.714	1
Plekho2	0.00763	-0.0487615	0.267	0.336	1
Scd2	0.00765753	-0.116632	0.548	0.6	1
Stk26	0.00766028	-0.0876925	0.569	0.647	1
Unk	0.00766869	-0.0251904	0.066	0.103	1
Cast	0.00771412	-0.107627	0.662	0.725	1
Cyb5d2	0.00774067	-0.0324097	0.078	0.118	1
Ctla2a	0.00774917	-0.149318	0.868	0.859	1
Zfp26	0.00775637	-0.0311581	0.098	0.142	1
Eif4g1	0.00781807	-0.0878781	0.681	0.756	1
Kpna4	0.00786966	-0.0629085	0.496	0.575	1
Larp1	0.00787505	0.0895271	0.632	0.591	1
Thyn1	0.00789626	0.0779232	0.653	0.62	1
Reep5	0.00793938	0.0896068	0.986	0.977	1
Tvp23b	0.00800368	0.0506109	0.341	0.283	1
Arl14ep	0.00802364	-0.0724305	0.422	0.484	1
Pnrc2	0.00803792	-0.0460772	0.244	0.301	1
Zfp445	0.00803831	-0.064013	0.262	0.317	1
Samhd1	0.00804816	-0.0665351	0.54	0.63	1
0610009B22Rik	0.00814593	0.0716302	0.249	0.199	1
Gng3	0.0081892	-0.0162491	0.073	0.112	1
Cd226	0.00821724	0.0789509	0.65	0.587	1
Spin2c	0.00822938	-0.035019	0.129	0.179	1
Tk1	0.00825099	0.0827343	0.78	0.73	1
Selenoh	0.00830956	0.115392	0.906	0.9	1
Gtpbp2	0.00833711	-0.055311	0.366	0.438	1
Tmem9	0.00834451	0.0423788	0.179	0.133	1
Zmynd19	0.00838129	0.078219	0.483	0.428	1
Mtx1	0.00839878	0.0852629	0.444	0.396	1
Gsr	0.00845884	0.0744825	0.56	0.515	1
Plpp5	0.00846243	0.0332459	0.162	0.115	1
Ski	0.00852232	-0.0336261	0.104	0.148	1
Pgam5	0.0086301	-0.0575373	0.279	0.336	1
Elk3	0.00865959	-0.0903942	0.621	0.653	1
Zfp942	0.00868164	-0.0459863	0.127	0.172	1
Polr2m	0.00872086	-0.0593188	0.675	0.752	1
Dpm3	0.0087389	-0.0881327	0.804	0.852	1
Polr1c	0.00874543	-0.051082	0.344	0.412	1
Wbp11	0.00882865	-0.0843437	0.515	0.581	1
Mkl1	0.00883292	-0.0466442	0.143	0.192	1
Tfdp2	0.00887916	-0.0438748	0.201	0.258	1
Ccdc43	0.00888203	0.0539456	0.374	0.313	1
Dazap1	0.00888957	0.0829896	0.83	0.792	1
Tmf1	0.0088957	-0.0729983	0.44	0.504	1
Gpr171	0.00891933	-0.0627985	0.317	0.382	1
Reps1	0.00892168	-0.0694494	0.252	0.307	1
Hcfc1	0.00902881	-0.0799277	0.44	0.491	1
Psmb4	0.00903581	0.0794354	0.978	0.984	1
Chchd4	0.00904192	0.0831733	0.414	0.364	1
Ikzf1	0.00915185	-0.114467	0.817	0.855	1
Eif1ax	0.00915921	0.0809326	0.945	0.935	1
Rpl35	0.00917864	0.0796958	1	0.997	1
Tpst2	0.00918137	0.087864	0.405	0.356	1
Vasp	0.00919058	-0.0778456	0.974	0.984	1
Atic	0.00919457	0.0873375	0.686	0.651	1
Enpp4	0.0092008	-0.0450614	0.082	0.121	1
Dapk2	0.00920986	-0.0724	0.478	0.544	1
Gabpb2	0.00923512	-0.0430605	0.411	0.488	1
Tmod3	0.00923552	-0.0768994	0.648	0.717	1
Rbms1	0.00926252	-0.0666568	0.752	0.809	1
Tle3	0.00928112	-0.0696649	0.223	0.275	1
Pradc1	0.00929445	0.0724991	0.395	0.347	1
Chpf2	0.00929767	-0.0318927	0.084	0.123	1
Hipk2	0.00936641	-0.0367459	0.09	0.131	1
Cd55	0.00939426	0.11637	0.417	0.367	1
Sod1	0.00941144	-0.109179	0.657	0.717	1
Mis12	0.00949829	-0.040178	0.19	0.244	1
Ttc39b	0.00955557	-0.0794246	0.477	0.538	1
Rnf38	0.00956211	-0.0364556	0.111	0.155	1
Pdzd8	0.0096411	-0.0568269	0.323	0.382	1
Uvssa	0.0096483	-0.0306096	0.09	0.131	1
Mrps18b	0.00965595	0.097053	0.549	0.519	1
Padi2	0.00973476	-0.0506361	0.144	0.194	1
Atxn7l3b	0.00973723	-0.067277	0.7	0.747	1
Samd3	0.00974499	-0.0275407	0.092	0.132	1
Ptpn22	0.00974578	-0.0914594	0.885	0.918	1
Ankib1	0.00981919	-0.0480244	0.355	0.413	1
Romo1	0.00989721	-0.0736299	0.863	0.895	1
Ep400	0.00993228	-0.0782125	0.442	0.509	1
Stat1	0.00995784	-0.136741	0.863	0.894	1
Hnrnpul2	0.00996119	-0.0915141	0.561	0.624	1
Atp9b	0.00999257	-0.0428698	0.176	0.23	1
Ing2	0.0100138	-0.0506129	0.388	0.445	1
Rsrp1	0.010091	-0.0696693	0.862	0.885	1
Tomm40	0.0101146	0.0849092	0.773	0.762	1
Pdgfb	0.0101532	-0.0428666	0.179	0.232	1
Lsm14a	0.0101788	-0.0660881	0.535	0.591	1
Pde7a	0.0101848	-0.0537101	0.303	0.363	1
Ndufs2	0.0102011	0.060481	0.896	0.865	1
mt-Co1	0.0102056	-0.0940425	1	1	1
Uba3	0.0102497	-0.03849	0.262	0.324	1
Manea	0.0103938	-0.0446949	0.103	0.145	1
Eci1	0.0104135	0.0636115	0.572	0.514	1
Tmem199	0.0104202	0.0543748	0.342	0.286	1
Tmem208	0.010486	0.0673016	0.785	0.75	1
Glipr2	0.0104979	-0.0710706	0.571	0.621	1
Cdk11b	0.0105223	-0.0940168	0.634	0.702	1
Rrp9	0.0105259	0.0753869	0.47	0.439	1
Zbtb32	0.0105329	0.0835315	0.757	0.732	1
Wac	0.0105579	-0.0644477	0.658	0.703	1
Snrpa	0.0105805	0.0760321	0.812	0.811	1
B930036N10Rik	0.0106056	-0.0595754	0.116	0.159	1
Zc3h4	0.0106094	-0.0519467	0.197	0.25	1
Cyhr1	0.0106226	-0.0576984	0.318	0.379	1
Got2	0.0106511	-0.0712386	0.693	0.74	1
Iqsec1	0.0106824	-0.0561124	0.335	0.393	1
Mpc2	0.0106872	0.0765964	0.787	0.768	1
Impact	0.0107372	-0.0354869	0.1	0.141	1
Dctn1	0.0107387	-0.0486223	0.2	0.253	1
Ethe1	0.0107997	0.0651008	0.345	0.296	1
Prkd3	0.0109213	-0.0552211	0.156	0.202	1
Ssh1	0.0109363	-0.0327871	0.087	0.126	1
Os9	0.0109381	-0.0618319	0.635	0.704	1
Spata5	0.010968	0.0577609	0.326	0.273	1
Rad51ap1	0.0109882	0.0594645	0.301	0.248	1
Eif4ebp2	0.0110243	-0.0568723	0.495	0.574	1
Bzw2	0.0110619	0.0712842	0.681	0.636	1
Rnf13	0.0110671	-0.0650402	0.268	0.314	1
Trappc6b	0.0110688	-0.0673933	0.653	0.713	1
Camk1d	0.0110697	-0.0341222	0.103	0.143	1
Polr1e	0.0110743	0.0687026	0.27	0.222	1
Snrnp200	0.0111133	-0.0681734	0.444	0.506	1
Ptrh2	0.0111344	0.0682611	0.533	0.504	1
Hist1h2an	0.01115	-0.0495336	0.177	0.228	1
Rbpj	0.0111797	-0.104221	0.957	0.96	1
Cyth1	0.0112064	-0.0346778	0.093	0.132	1
Sf3a2	0.0113009	-0.0433522	0.351	0.413	1
Sympk	0.0113224	-0.0550349	0.222	0.28	1
Rab11fip1	0.0113649	-0.0292132	0.083	0.122	1
P2ry10	0.0113853	-0.0398947	0.309	0.377	1
S1pr4	0.0115604	-0.037581	0.26	0.326	1
Tnrc18	0.0115605	-0.0558334	0.165	0.212	1
Mrps26	0.0115633	0.0788912	0.906	0.881	1
Nup35	0.0115725	0.0499548	0.314	0.265	1
Ndufs5	0.0116054	0.0777446	0.957	0.957	1
Lcp2	0.011631	-0.0679979	0.611	0.671	1
Arhgap45	0.011654	-0.0726908	0.556	0.621	1
Rpl30	0.0116932	0.0410125	0.999	0.999	1
Nup98	0.0116989	-0.0538768	0.361	0.428	1
Golga4	0.0117388	-0.0813207	0.36	0.423	1
Brd9	0.0117465	-0.0666466	0.425	0.494	1
Phf3	0.0117788	-0.0819744	0.65	0.696	1
Map2k2	0.0118007	0.0692474	0.801	0.783	1
Clk2	0.0118414	-0.0466723	0.146	0.192	1
Pnp	0.0118551	0.08361	0.656	0.646	1
Sigmar1	0.011856	0.0606491	0.34	0.284	1
Naa30	0.0118591	-0.0366234	0.122	0.166	1
Pdcd1lg2	0.0119316	0.0645725	0.372	0.314	1
Cyb561d2	0.0120143	0.0856713	0.436	0.392	1
1700020I14Rik	0.0120844	-0.0882391	0.72	0.763	1
Epc2	0.0121059	-0.0645742	0.29	0.354	1
Twf1	0.0121119	-0.0541007	0.175	0.222	1
Trappc11	0.0121152	-0.0297488	0.123	0.169	1
Tram1	0.0121202	-0.0690944	0.757	0.798	1
Cks2	0.0121257	0.066436	0.625	0.564	1
Ceacam16	0.0121482	-0.0421022	0.12	0.162	1
Itga4	0.0121674	-0.121779	0.838	0.838	1
Iqcc	0.0122215	-0.0296332	0.071	0.106	1
Bcl2a1b	0.012229	0.0649766	0.953	0.956	1
Snrpe	0.0122986	0.0576847	0.998	0.999	1
Fbxl20	0.0123083	-0.0318362	0.112	0.155	1
Zyg11b	0.0123136	-0.049274	0.18	0.234	1
Tob1	0.0123298	-0.0375869	0.096	0.136	1
Rinl	0.0123621	-0.05869	0.846	0.89	1
Ndufc2	0.0124389	0.0860778	0.958	0.935	1
Zfp644	0.0124568	-0.0593667	0.583	0.657	1
Selenoi	0.0124605	-0.073967	0.411	0.471	1
Cmc2	0.0124882	0.0856768	0.572	0.534	1
Ebpl	0.0124885	0.0837285	0.611	0.572	1
Zfp688	0.0125168	-0.0295989	0.165	0.214	1
Lysmd3	0.0125873	-0.0400026	0.128	0.172	1
Naa10	0.0126993	0.0696112	0.796	0.76	1
Htt	0.0127041	-0.0726319	0.297	0.35	1
Ap3d1	0.0127093	-0.0526911	0.197	0.247	1
Pafah1b1	0.0127518	-0.0862205	0.887	0.908	1
Gbf1	0.0128478	-0.0724424	0.273	0.323	1
1810022K09Rik	0.0128796	-0.079163	0.783	0.841	1
Bcap31	0.012883	0.079473	0.881	0.869	1
Dpy19l1	0.0128992	-0.0752849	0.373	0.43	1
9530068E07Rik	0.0129284	-0.049957	0.421	0.495	1
Zfp865	0.0130207	-0.042983	0.128	0.172	1
Appbp2	0.0130983	0.0551244	0.279	0.232	1
Cops7b	0.0131042	-0.0352555	0.112	0.154	1
Nsmce3	0.0131206	0.0693352	0.509	0.462	1
Gmnn	0.0131832	0.0683381	0.84	0.795	1
Rpusd4	0.0131941	0.0487096	0.233	0.187	1
Psmd9	0.0132625	0.0757752	0.525	0.494	1
Cdkn1b	0.0132769	-0.0852471	0.391	0.452	1
Cltc	0.0133197	-0.0872612	0.611	0.661	1
Wdr77	0.0133234	0.0744445	0.452	0.412	1
Csf1	0.0133283	-0.0739524	0.348	0.413	1
Eif3d	0.0133506	0.0823758	0.9	0.9	1
Psmd13	0.013386	0.0793428	0.86	0.864	1
Arap2	0.0134858	-0.0333982	0.318	0.395	1
Smg1	0.0136218	-0.0711724	0.481	0.555	1
Mrps17	0.0136277	0.0570524	0.765	0.717	1
Lilrb4a	0.0136426	-0.040186	0.073	0.108	1
Spred1	0.0136523	-0.0427695	0.122	0.165	1
Dpp4	0.0136528	-0.0904819	0.323	0.37	1
Myo1f	0.0136819	-0.0632169	0.442	0.518	1
Tra2a	0.0137152	-0.0924343	0.868	0.898	1
Med12	0.0138007	-0.0435383	0.226	0.283	1
Ranbp9	0.0138981	-0.037571	0.383	0.463	1
Bin2	0.0139313	-0.0572474	0.701	0.773	1
Slk	0.0140461	-0.08309	0.463	0.512	1
Abcf2	0.0141092	0.0768016	0.515	0.482	1
Noc4l	0.01411	0.0911289	0.433	0.393	1
Vopp1	0.0142014	-0.0246573	0.121	0.165	1
Zcchc11	0.0142027	-0.0573191	0.562	0.641	1
Arhgap15	0.0142086	-0.0820165	0.539	0.607	1
Arid1a	0.0142465	-0.0792205	0.546	0.607	1
Nfatc1	0.0142806	-0.102297	0.567	0.615	1
Ndufs7	0.0143139	0.068615	0.904	0.882	1
Nudcd3	0.0143606	-0.0686514	0.528	0.59	1
Phf5a	0.0143898	0.0806871	0.883	0.857	1
S100a10	0.0144066	-0.0751167	0.992	0.991	1
Plrg1	0.0144257	-0.0503719	0.207	0.257	1
Ccndbp1	0.0144478	-0.0701555	0.491	0.544	1
Zfp593	0.0145291	0.0818394	0.617	0.591	1
Nf2	0.0145713	-0.045966	0.158	0.201	1
Tnrc6b	0.0146259	-0.0616481	0.444	0.506	1
Srpk2	0.0146356	-0.0771409	0.563	0.613	1
Abraxas2	0.0146822	-0.0334027	0.208	0.263	1
Cdkn2d	0.0147032	-0.0348653	0.12	0.162	1
Tmem43	0.0147318	-0.0291353	0.099	0.138	1
Zbtb8os	0.0147473	0.0631813	0.827	0.808	1
Rock1	0.0147538	-0.0723649	0.833	0.871	1
Psmc5	0.0147788	0.0863562	0.854	0.842	1
Vamp5	0.0149792	-0.0579014	0.198	0.244	1
Mrpl32	0.0149859	0.0742557	0.815	0.802	1
Pebp1	0.0150059	0.0750721	0.97	0.974	1
Akna	0.0150328	-0.0815773	0.602	0.653	1
Polr2f	0.0150451	0.0610614	0.94	0.933	1
Tnfsf10	0.0150761	-0.0483544	0.389	0.461	1
Pxmp2	0.0151036	0.0428012	0.173	0.132	1
Rrp1b	0.0151107	0.0506499	0.543	0.502	1
Gbe1	0.0151415	-0.032403	0.087	0.123	1
Ap4s1	0.0151671	0.084464	0.531	0.499	1
Tcrg-C2	0.015172	-0.147583	0.406	0.451	1
Klf7	0.015174	-0.0576457	0.183	0.23	1
Cbl	0.0152088	-0.0626751	0.423	0.481	1
Ate1	0.0152243	-0.0693055	0.329	0.386	1
Ppp2r1a	0.0152274	-0.0385296	0.54	0.611	1
Ifi214	0.0152695	-0.10242	0.369	0.428	1
Aurkaip1	0.0152912	0.071325	0.947	0.934	1
Med29	0.015329	0.0722088	0.512	0.484	1
Rps18	0.0153293	0.0399522	1	1	1
Faah	0.0153515	-0.0387394	0.145	0.191	1
Tm9sf3	0.0153635	-0.0966189	0.838	0.882	1
1810030O07Rik	0.0154155	-0.0670224	0.314	0.374	1
Ssb	0.0154716	0.0611549	0.982	0.974	1
Pnisr	0.0155329	-0.0921914	0.745	0.786	1
Lpp	0.0155349	-0.0619682	0.192	0.238	1
Pex7	0.0155509	-0.0531964	0.273	0.329	1
Myo1e	0.0155587	-0.0422263	0.119	0.161	1
Klrc1	0.0155591	-0.0570841	0.987	0.987	1
Ik	0.0155716	-0.0582685	0.602	0.67	1
Grpel1	0.0156337	0.0776668	0.808	0.802	1
Cnp	0.0156453	-0.071186	0.69	0.743	1
Ddx6	0.0156821	-0.0707594	0.623	0.671	1
Nup93	0.0156982	0.0455824	0.299	0.248	1
Alyref	0.01575	0.0918846	0.899	0.914	1
Rlf	0.015764	-0.0862835	0.44	0.504	1
Ung	0.0157675	0.0779652	0.579	0.551	1
Rangrf	0.0158627	-0.0189588	0.152	0.202	1
Sec11a	0.0158753	0.0701373	0.919	0.897	1
Mrps24	0.0158999	0.0789647	0.94	0.937	1
Dctn4	0.0159114	-0.067867	0.496	0.544	1
Ints13	0.015939	-0.0574419	0.262	0.313	1
Yif1a	0.0159934	0.0624423	0.401	0.36	1
Emsy	0.0160141	-0.0620999	0.321	0.385	1
Cog1	0.0162113	-0.0452288	0.13	0.171	1
Tmem170b	0.0162351	-0.0405935	0.114	0.154	1
Spry2	0.0162706	-0.064596	0.255	0.308	1
Acot8	0.0163798	0.0690077	0.33	0.293	1
Bloc1s1	0.0163804	-0.0481845	0.538	0.605	1
Tmsb4x	0.0164383	0.0551141	1	1	1
Mpp6	0.0165504	0.0770021	0.773	0.749	1
Polr2d	0.0166036	0.0804731	0.448	0.419	1
Rpl36al	0.0166294	-0.0434003	1	0.997	1
Ncf1	0.0166659	-0.0479295	0.09	0.126	1
Morf4l1	0.0167046	-0.0794532	0.962	0.983	1
Tmsb15b1	0.0167757	-0.0425743	0.119	0.159	1
Scpep1	0.016777	-0.0392039	0.101	0.139	1
Cep85	0.0167779	-0.0398667	0.104	0.142	1
Atp5e	0.0168365	-0.0413735	0.998	0.997	1
Sbf1	0.0168995	-0.0529043	0.283	0.336	1
Cbfb	0.0169596	-0.0723346	0.626	0.676	1
Csnk2a1	0.0169702	-0.0819203	0.788	0.834	1
2410002F23Rik	0.0170824	0.0575425	0.293	0.248	1
Ifrd2	0.0170843	0.0587925	0.303	0.257	1
Glipr1	0.0171129	0.09202	0.731	0.707	1
Pabpc1	0.0171217	-0.0584966	0.997	1	1
Ap2b1	0.0171298	-0.0733883	0.471	0.535	1
Rad50	0.0171442	0.0659893	0.619	0.557	1
Ogfod3	0.0171989	0.0500276	0.16	0.121	1
Pgp	0.0172603	0.083679	0.634	0.611	1
Haus2	0.0174372	-0.0496045	0.178	0.225	1
Wdr1	0.0174428	-0.0767919	0.885	0.93	1
Gng12	0.0175073	0.0429147	0.102	0.07	1
Acadvl	0.0175075	-0.0431084	0.266	0.323	1
Paip2b	0.0175155	-0.0421163	0.112	0.151	1
Rcc1	0.0176055	0.0512782	0.315	0.265	1
Ubald1	0.0176255	-0.0502754	0.261	0.314	1
Rdm1	0.0176642	0.0628522	0.254	0.211	1
Spcs2	0.0177193	0.0671644	0.981	0.987	1
Smim11	0.017756	0.070555	0.805	0.77	1
Psma7	0.0178202	0.0549519	0.998	0.996	1
Birc5	0.0178634	0.0612387	0.234	0.187	1
Safb	0.0178649	-0.0716887	0.421	0.478	1
BC017643	0.0178994	-0.0434976	0.264	0.32	1
Gar1	0.017947	0.0607229	0.796	0.782	1
Hltf	0.0180117	-0.0605131	0.365	0.428	1
Eif3h	0.0180154	0.0591855	1	0.997	1
H2afx	0.018154	0.0711484	0.495	0.463	1
Trbc1	0.0182255	-0.361509	0.802	0.746	1
Ttc14	0.0182472	-0.0579048	0.759	0.798	1
Nsmaf	0.0182847	-0.0991344	0.549	0.604	1
2410004B18Rik	0.0183063	0.059807	0.373	0.323	1
Get4	0.0183474	0.0643233	0.398	0.354	1
Wdr44	0.0183494	-0.0476675	0.18	0.228	1
Slirp	0.0183579	-0.0686768	0.692	0.753	1
Atn1	0.0183812	-0.0380803	0.123	0.162	1
Evi2	0.0184471	-0.0267569	0.134	0.179	1
Pogk	0.0184701	-0.0300681	0.08	0.115	1
Ube2l3	0.0184971	0.0673126	0.977	0.981	1
Slc19a1	0.0185176	0.0536176	0.226	0.182	1
Slfn1	0.0185306	-0.0712673	0.316	0.376	1
Elovl1	0.0185904	-0.0606392	0.436	0.496	1
Pdcd6ip	0.0186501	-0.0750406	0.743	0.785	1
Pet100	0.0187401	-0.067988	0.691	0.723	1
Hist1h1e	0.0188133	-0.1095	0.894	0.902	1
Ier5	0.0188777	-0.0749122	0.634	0.676	1
Use1	0.0189489	-0.0651931	0.514	0.584	1
Fam96b	0.0189533	0.0739869	0.802	0.795	1
Ccdc34	0.0189883	0.075242	0.423	0.376	1
Rgs8	0.0190763	0.0471593	0.218	0.171	1
Prdx4	0.0191439	0.0669462	0.35	0.3	1
Ylpm1	0.0191817	-0.0630042	0.346	0.4	1
Lrrc14	0.0192475	-0.0212311	0.091	0.128	1
Pigb	0.0193017	-0.0260038	0.075	0.108	1
Gm10073	0.0193024	0.0656756	0.399	0.356	1
Cap1	0.0193527	-0.0769856	0.932	0.95	1
Foxp1	0.0193668	-0.0756447	0.315	0.363	1
Smc1a	0.0193694	-0.0844923	0.85	0.887	1
Akt1	0.0194115	-0.0718061	0.631	0.667	1
N4bp2	0.0194582	-0.0413795	0.084	0.119	1
Cd69	0.0194713	-0.0835237	0.624	0.677	1
Klc3	0.0195068	-0.0215398	0.095	0.132	1
Hspa1b	0.0195266	-0.210078	0.235	0.283	1
Acadl	0.019583	0.0773495	0.86	0.859	1
Etfb	0.0195877	0.0875119	0.941	0.941	1
Ldb1	0.0196053	-0.061115	0.418	0.468	1
Uggt1	0.0196539	-0.0557612	0.432	0.479	1
Rplp1	0.0197343	-0.0350419	1	1	1
Yy1	0.019811	-0.0970405	0.765	0.795	1
AU020206	0.0198341	-0.0652657	0.386	0.438	1
Hyou1	0.0198605	0.0469297	0.284	0.232	1
Riox2	0.0200317	0.0621812	0.445	0.402	1
Srp14	0.0200937	0.0528517	0.97	0.98	1
Bax	0.0201116	0.0689156	0.944	0.958	1
Tm2d2	0.0201141	0.059254	0.376	0.337	1
Rrm2	0.0201479	0.079449	0.445	0.392	1
Noc2l	0.0201729	0.0661897	0.629	0.601	1
Styx	0.0201876	-0.0327948	0.087	0.121	1
Mir155hg	0.0203042	0.10479	0.349	0.311	1
Rela	0.0203065	-0.0552062	0.32	0.379	1
Cep250	0.0203582	-0.0524838	0.346	0.41	1
Bri3	0.02036	0.0708235	0.71	0.693	1
Tkt	0.0204306	0.0489723	0.967	0.963	1
Rer1	0.0204359	0.0719686	0.923	0.925	1
Grcc10	0.0204958	-0.0734878	0.714	0.759	1
Igfbp7	0.0204961	0.0555424	0.238	0.188	1
Syt11	0.0204978	-0.0331419	0.188	0.237	1
Tspan4	0.0205416	0.0551184	0.262	0.217	1
Cinp	0.0207155	0.0582392	0.553	0.511	1
Hnrnpu	0.0208693	-0.0644468	0.98	0.989	1
Tnks2	0.0208747	-0.0700692	0.481	0.524	1
Rps20	0.0209545	0.0424384	1	1	1
Papd4	0.0209693	-0.0372602	0.312	0.373	1
Bscl2	0.021005	-0.0900051	0.565	0.598	1
Crls1	0.0210499	0.0543559	0.35	0.311	1
Mat2a	0.021062	0.108005	0.8	0.776	1
Polr3k	0.0211129	0.0682417	0.839	0.819	1
Gmfg	0.0211507	0.0754408	0.965	0.963	1
Sf3b1	0.0213621	-0.0544915	0.975	0.977	1
Arl2	0.021386	0.0460068	0.222	0.178	1
Grk2	0.0214121	-0.0739307	0.795	0.822	1
Exoc3	0.0214209	-0.0617073	0.496	0.545	1
Il10rb	0.0214278	-0.0701841	0.462	0.527	1
Hist1h3a	0.0214385	0.0630032	0.44	0.385	1
Tfpt	0.0215112	-0.041114	0.211	0.26	1
Sp110	0.0215362	-0.0606902	0.821	0.854	1
Lrrcc1	0.0215632	-0.0435593	0.256	0.311	1
Lasp1	0.0216439	-0.0615791	0.565	0.634	1
Mnt	0.0216493	-0.0394634	0.136	0.176	1
Fignl1	0.0216862	0.0427552	0.334	0.281	1
Dopey2	0.0217492	-0.0539825	0.14	0.179	1
Mtmr12	0.0219235	-0.0367036	0.137	0.181	1
Ubqln4	0.0219373	-0.0361547	0.156	0.199	1
Rhoq	0.0219373	-0.0276309	0.103	0.141	1
Ppp1r16b	0.0219395	-0.070578	0.565	0.621	1
Nfkbid	0.0219996	0.0439216	0.142	0.106	1
Minos1	0.02202	-0.0572704	0.99	0.994	1
Arl1	0.0220588	0.0691975	0.764	0.739	1
Nbeal1	0.0220617	-0.0292804	0.113	0.152	1
Map4k4	0.022082	-0.0488149	0.385	0.451	1
Gtf2h5	0.0221573	0.0611877	0.915	0.911	1
Lrrc59	0.0221642	0.0561739	0.57	0.535	1
Casp4	0.0221655	-0.0326299	0.151	0.194	1
Wdr45	0.0221798	-0.0415032	0.101	0.135	1
Srebf2	0.0221871	-0.054884	0.352	0.41	1
Nipal3	0.0222524	-0.0424418	0.129	0.169	1
Mapk1	0.0222576	-0.05956	0.687	0.736	1
Trp53bp1	0.0222988	-0.042102	0.146	0.189	1
Cpne2	0.0223021	0.028898	0.113	0.079	1
Clec2d	0.022361	-0.0653061	0.507	0.581	1
Ppp2r5c	0.0224299	-0.0638979	0.56	0.624	1
Tomm20	0.022464	0.0651679	0.981	0.974	1
Hadha	0.0225325	-0.0836239	0.7	0.739	1
Celf2	0.0225335	-0.0937589	0.923	0.944	1
Nmt1	0.0225667	-0.0884736	0.717	0.76	1
Skap2	0.0226336	-0.0449088	0.217	0.267	1
Serinc3	0.0227201	-0.1194	0.811	0.818	1
Cct4	0.0227645	0.0728785	0.953	0.943	1
Irf2bpl	0.0227681	-0.0437058	0.256	0.304	1
Slc38a1	0.0227711	-0.0851472	0.84	0.869	1
Dctn2	0.022816	-0.0567	0.629	0.689	1
Stub1	0.0228423	0.0713474	0.71	0.683	1
Ugdh	0.0228521	-0.0660459	0.252	0.293	1
Nipbl	0.0228552	-0.0759456	0.638	0.68	1
Nfkbie	0.0228602	-0.0536635	0.176	0.22	1
Psmd8	0.022875	0.0650199	0.945	0.944	1
Ensa	0.0228831	-0.0611025	0.491	0.542	1
Gxylt1	0.0229237	-0.0554883	0.355	0.41	1
Dr1	0.0229766	-0.0546691	0.414	0.466	1
Rpp40	0.0229994	0.0453151	0.132	0.099	1
Psmd11	0.0230112	0.0623019	0.875	0.867	1
AC149090.1	0.0230361	-0.057676	0.627	0.676	1
Abhd17a	0.0231452	0.0626151	0.812	0.798	1
Sorl1	0.0232627	-0.0582197	0.419	0.482	1
Vps28	0.023322	0.0721677	0.898	0.904	1
Tesc	0.0233574	0.049422	0.169	0.131	1
Hsd17b10	0.0233734	0.0841781	0.804	0.769	1
Scaf1	0.0234482	-0.0287546	0.152	0.198	1
Utf1	0.0234719	0.0461807	0.286	0.238	1
Gak	0.0234806	-0.0446863	0.233	0.286	1
Dennd6a	0.0235112	-0.0293411	0.093	0.128	1
Wrap53	0.0235132	0.0445475	0.193	0.151	1
Csde1	0.0235649	-0.090293	0.789	0.819	1
Cenpc1	0.0235749	-0.0523239	0.208	0.254	1
Sppl3	0.0235767	-0.0287294	0.191	0.241	1
Ppa2	0.0236293	0.0531014	0.483	0.429	1
Arf5	0.023653	0.0594748	0.995	0.981	1
Yme1l1	0.0237703	-0.0711644	0.585	0.654	1
Hipk1	0.0239048	-0.0498832	0.331	0.38	1
Hdgfl3	0.0239861	-0.0262984	0.122	0.162	1
Rpp30	0.0239977	0.06246	0.404	0.36	1
Cenps	0.0240001	0.0657849	0.585	0.549	1
Arhgap4	0.0241281	-0.0492219	0.289	0.347	1
Pdia3	0.0241323	0.059589	0.978	0.99	1
Grap	0.0241945	-0.0785817	0.543	0.598	1
Cish	0.0243483	-0.0585943	0.212	0.263	1
Cops4	0.0243915	0.0704681	0.826	0.811	1
Fbxo7	0.0245207	-0.0441842	0.17	0.214	1
Phgdh	0.0245209	0.0755822	0.874	0.882	1
Ddx56	0.0245431	0.0625904	0.366	0.317	1
Umps	0.0245712	0.0594679	0.572	0.528	1
Dkc1	0.0245726	0.0730866	0.814	0.796	1
Fam120a	0.0246988	-0.0630664	0.581	0.644	1
Pitpnm1	0.024732	-0.0269352	0.176	0.224	1
Mphosph6	0.0247784	-0.0478843	0.502	0.568	1
Mrpl36	0.0248538	0.06062	0.815	0.803	1
Srek1	0.0248842	0.0731719	0.502	0.463	1
Irf1	0.0249702	-0.0563228	0.439	0.495	1
Ncor1	0.024985	-0.0970653	0.896	0.925	1
Cdk6	0.0250005	-0.107767	0.935	0.943	1
Eif3k	0.0251137	0.057912	0.998	0.991	1
Kmt2d	0.0251645	-0.0516329	0.201	0.245	1
Psenen	0.0252405	0.0636493	0.927	0.94	1
Ciz1	0.0252472	-0.044379	0.199	0.245	1
Gm30025	0.0252532	-0.0176775	0.074	0.108	1
Cebpg	0.0253116	-0.0487862	0.341	0.403	1
Sem1	0.0253267	0.0449251	0.997	0.993	1
Ccdc137	0.0253695	-0.0293698	0.089	0.122	1
Fkbp2	0.0253722	0.0678097	0.855	0.835	1
Rps6ka1	0.025512	-0.0636012	0.656	0.712	1
Cops6	0.0255618	0.0650575	0.85	0.828	1
Gcsh	0.0255881	0.0776925	0.529	0.498	1
Itch	0.0256228	-0.0672219	0.369	0.42	1
Smarce1	0.0257352	-0.0618676	0.67	0.733	1
Bloc1s2	0.0257617	0.0733781	0.514	0.481	1
H2afv	0.0258238	-0.0953195	0.805	0.835	1
Hk1	0.0258254	-0.0516381	0.425	0.479	1
Dpy30	0.0258493	0.057947	0.904	0.901	1
Gnptab	0.0258528	-0.0670759	0.518	0.584	1
Diaph3	0.025879	-0.0501773	0.119	0.156	1
Galnt6	0.0260802	-0.0494372	0.299	0.35	1
Pdxk	0.0262065	0.0473052	0.172	0.135	1
Plin3	0.0262159	0.0331965	0.108	0.076	1
Ifitm10	0.0262705	-0.0560398	0.475	0.529	1
Rpl36a	0.0263081	-0.0373765	1	1	1
Relb	0.0263125	-0.0486338	0.204	0.255	1
Mctp2	0.0264287	-0.0566051	0.298	0.356	1
Rbl2	0.0264708	-0.0671312	0.653	0.727	1
Arhgdib	0.0264847	-0.0535666	0.999	0.999	1
Hist1h2be	0.0265046	-0.0461998	0.244	0.297	1
Narf	0.0265448	-0.0369761	0.107	0.143	1
Adam19	0.0265481	-0.0868375	0.433	0.491	1
Aimp1	0.0265714	0.0479465	0.877	0.891	1
Ostc	0.0267187	0.0694332	0.954	0.958	1
Cenpa	0.0267561	0.076559	0.716	0.671	1
Vps39	0.0267686	-0.0431837	0.131	0.169	1
Naa50	0.0268338	0.0571688	0.773	0.763	1
Atp5a1	0.0270698	0.0486258	0.982	0.99	1
Bcl10	0.0271495	-0.0427995	0.483	0.565	1
Znrd1	0.0272156	0.064088	0.697	0.67	1
Nfe2l1	0.0272222	-0.0374094	0.275	0.336	1
Acox3	0.0272356	-0.0311686	0.093	0.126	1
Med4	0.0272477	0.0668828	0.383	0.343	1
Ero1l	0.0272676	-0.0604788	0.425	0.475	1
Stat3	0.0273434	-0.0690395	0.814	0.864	1
Selenof	0.0274748	0.0576808	0.952	0.953	1
Dennd4b	0.0275131	-0.0338444	0.098	0.132	1
Rpl7	0.0275369	0.0385499	1	1	1
Kdm2a	0.0275677	-0.060294	0.444	0.508	1
Rbms2	0.027576	-0.0338829	0.251	0.306	1
Ctps2	0.027708	-0.033995	0.181	0.228	1
Ddt	0.0277246	0.0806741	0.825	0.789	1
Jkamp	0.0277819	0.0562316	0.333	0.294	1
Kif18a	0.0278809	0.0305554	0.16	0.123	1
Birc2	0.0279978	-0.0725354	0.604	0.654	1
Aco2	0.0280671	-0.0644004	0.644	0.714	1
Arhgap17	0.0283199	-0.0870111	0.453	0.499	1
Abhd12	0.028397	0.0542069	0.357	0.311	1
Ube2i	0.0284207	0.0532726	0.977	0.981	1
Exosc4	0.0285144	0.0726897	0.604	0.571	1
Pgam1	0.0286156	0.0725182	0.967	0.976	1
Slc35a3	0.0286196	-0.0418138	0.186	0.234	1
Dtx3l	0.0286276	-0.0571505	0.37	0.422	1
Gngt2	0.0286753	-0.0321014	0.201	0.25	1
Nhlrc3	0.0286901	-0.0473807	0.13	0.166	1
Psmg4	0.0287037	0.049415	0.76	0.725	1
Arl4c	0.0287318	-0.0735155	0.371	0.43	1
Nifk	0.0288346	0.0741169	0.67	0.63	1
Tatdn1	0.0288952	0.0424726	0.305	0.254	1
Polr2g	0.0289064	0.0752809	0.861	0.869	1
Pip5k1a	0.0289267	-0.0355754	0.238	0.29	1
Pacs2	0.0289948	-0.0412372	0.133	0.169	1
Vdac2	0.0290798	0.0462905	0.974	0.977	1
Dnajc2	0.0290828	0.0730037	0.885	0.897	1
Rab12	0.0291027	-0.0312843	0.132	0.172	1
Rgs14	0.0291353	-0.0480363	0.221	0.271	1
Ywhag	0.0291374	-0.066196	0.482	0.538	1
Maf1	0.0291696	-0.0565561	0.38	0.448	1
Wbp2	0.0291955	-0.0478573	0.285	0.337	1
Chsy1	0.0292593	-0.108688	0.696	0.735	1
Ccna2	0.0293045	0.0505388	0.142	0.109	1
Lgals1	0.0293304	0.0409305	1	1	1
Hist1h2bg	0.0294919	-0.0238093	0.103	0.138	1
Adcy7	0.0295638	-0.0708209	0.584	0.641	1
Naa38	0.0297343	-0.0563675	0.769	0.795	1
Rusc1	0.0297953	0.0448651	0.195	0.156	1
Micu2	0.0298875	-0.0323852	0.442	0.511	1
Retreg3	0.0299401	-0.0348571	0.157	0.198	1
Snhg6	0.0299929	-0.0515745	0.477	0.542	1
Ostf1	0.0300015	0.0743725	0.966	0.97	1
Trp53i13	0.0300406	-0.0475688	0.258	0.308	1
Lrmp	0.0300934	-0.0703633	0.718	0.789	1
Kat2b	0.0301188	-0.044227	0.211	0.26	1
Ccdc93	0.0302165	-0.0285305	0.121	0.159	1
Ogg1	0.0303178	-0.0194101	0.081	0.115	1
Tshz1	0.0303184	-0.0619107	0.303	0.349	1
Mmab	0.0303694	0.0366366	0.13	0.098	1
Dcaf17	0.0303706	-0.0452379	0.126	0.161	1
Ddx50	0.0304367	-0.0870409	0.74	0.772	1
Gorasp2	0.0306103	0.0350374	0.404	0.354	1
Tmem258	0.0306812	-0.0687039	0.966	0.976	1
Psme1	0.0307584	-0.0541499	0.999	0.997	1
Serpinb9b	0.0307681	-0.0250181	0.204	0.255	1
Ddx20	0.0307739	0.0453776	0.131	0.099	1
Phospho2	0.0308139	-0.0244294	0.146	0.188	1
Nutf2	0.0308241	-0.0399351	0.358	0.412	1
Alg6	0.0308736	0.0444839	0.23	0.192	1
Gstt2	0.0308743	0.0436528	0.316	0.27	1
Zbtb11	0.0309172	-0.0602069	0.293	0.343	1
Itpr3	0.030926	-0.0271612	0.089	0.122	1
Sec24a	0.030991	-0.0424134	0.212	0.258	1
Rpl7a	0.0310001	0.0450372	1	0.999	1
Tsfm	0.0310273	0.0653665	0.592	0.557	1
Gabarap	0.0310361	-0.0715115	0.937	0.951	1
Mcrip2	0.0310701	0.0387997	0.129	0.096	1
Rbm14	0.0311392	-0.0355593	0.264	0.317	1
Vamp3	0.0312151	-0.0657615	0.411	0.465	1
Chchd6	0.031293	0.0312008	0.12	0.088	1
Asns	0.0313261	0.0792296	0.365	0.333	1
Cobll1	0.0314216	-0.0439396	0.152	0.191	1
Kcnq1ot1	0.0314356	-0.123116	0.471	0.521	1
Trmt112	0.0314363	0.0651265	0.927	0.937	1
Papola	0.0317217	-0.0628312	0.766	0.812	1
Rab18	0.0317691	-0.0565597	0.525	0.603	1
Chuk	0.0318142	0.0319006	0.318	0.274	1
Wiz	0.03199	-0.0341585	0.108	0.142	1
Abhd16a	0.0320119	-0.0330117	0.253	0.304	1
Ldah	0.0320255	-0.0504072	0.269	0.319	1
Arhgap11a	0.0320436	-0.0298532	0.131	0.169	1
Wisp1	0.0321011	0.0623349	0.269	0.23	1
Gbp9	0.0321032	-0.0437875	0.329	0.383	1
Ndufb10	0.0321218	0.0496341	0.964	0.958	1
Ubqln2	0.032162	-0.0510585	0.276	0.323	1
Tmx1	0.0321674	-0.0639091	0.475	0.537	1
Sash3	0.0322574	-0.0465419	0.534	0.597	1
Il18rap	0.0322615	-0.12886	0.452	0.496	1
Rnaseh2a	0.0323017	0.0608754	0.522	0.489	1
Eomes	0.0323154	-0.081841	0.19	0.23	1
Eif1	0.0324023	0.0565069	1	1	1
Pim1	0.0324525	-0.101247	0.547	0.595	1
Rnf10	0.0325623	-0.0438691	0.572	0.64	1
Ubr7	0.0326201	-0.0425969	0.33	0.385	1
Lpcat4	0.0326569	-0.047696	0.299	0.35	1
Taok2	0.0327672	-0.0295965	0.145	0.185	1
Adrb1	0.032804	0.0476911	0.219	0.176	1
Nme6	0.0328105	0.03796	0.138	0.106	1
Suco	0.0328266	-0.0825024	0.457	0.499	1
Aprt	0.0328757	0.0571003	0.986	0.983	1
Dnajc8	0.032946	-0.0663569	0.881	0.911	1
Sil1	0.0330954	0.049738	0.197	0.161	1
Kansl1	0.0331402	-0.0547918	0.56	0.621	1
Mgme1	0.0331571	-0.0189845	0.118	0.158	1
Stap1	0.0333316	-0.0412131	0.598	0.64	1
Srrm1	0.0333476	0.0769838	0.952	0.943	1
Cd27	0.0333613	-0.0818856	0.878	0.887	1
Zfp472	0.0333645	-0.0272032	0.09	0.122	1
Mrpl15	0.0333825	0.0776043	0.833	0.806	1
Mtg1	0.0334364	0.0468678	0.236	0.195	1
H2afj	0.03346	0.0679186	0.932	0.918	1
Pcf11	0.033479	-0.0554671	0.322	0.377	1
Rab1b	0.0335202	-0.0490534	0.631	0.683	1
Ptk2b	0.0335306	-0.0658608	0.501	0.552	1
Uba1	0.0335465	-0.0575916	0.632	0.703	1
Sema4d	0.0336354	-0.0857135	0.564	0.617	1
Cnpy2	0.0336801	0.0582002	0.647	0.614	1
Creb1	0.0337059	-0.0694729	0.376	0.419	1
Tex9	0.0337432	-0.0708229	0.494	0.527	1
Dock10	0.0337773	-0.0646562	0.842	0.858	1
Cux1	0.033868	-0.0379329	0.228	0.274	1
Cope	0.034145	0.0752595	0.845	0.867	1
Sh3glb1	0.0341455	0.0707048	0.915	0.93	1
Sytl2	0.0341754	-0.0649933	0.438	0.494	1
Rps25	0.0342073	-0.0328599	1	1	1
Klf13	0.0342107	-0.0608534	0.63	0.674	1
mt-Nd6	0.0342616	-0.038056	0.22	0.264	1
0610037L13Rik	0.0342984	0.0485533	0.368	0.323	1
Cdk12	0.0344699	-0.0603934	0.555	0.617	1
Cep97	0.0346116	-0.0359293	0.151	0.189	1
mt-Nd4l	0.0346256	0.0957515	0.846	0.844	1
Wdr83os	0.0347147	0.0785158	0.629	0.617	1
Rbm3	0.0347341	0.0376049	0.997	0.999	1
Hdac4	0.0347656	-0.0314731	0.146	0.187	1
Smim4	0.0348474	-0.0644359	0.363	0.413	1
Acer3	0.0348751	0.0312843	0.135	0.102	1
Thoc1	0.0350129	0.0529336	0.345	0.301	1
Zfp263	0.0350511	-0.0369001	0.159	0.201	1
Dap	0.0350723	0.0649845	0.787	0.769	1
Ddost	0.0351713	0.065901	0.887	0.878	1
C330007P06Rik	0.0353809	-0.0523013	0.26	0.308	1
Armc10	0.0354691	-0.039528	0.289	0.343	1
Rgs19	0.0355752	0.0558675	0.591	0.544	1
Nubp2	0.0356531	0.058048	0.453	0.418	1
Stat5b	0.0357512	-0.0674913	0.255	0.298	1
Tbc1d1	0.0357784	-0.0622853	0.347	0.405	1
Rassf2	0.0358376	-0.0305933	0.123	0.158	1
2210016F16Rik	0.0359263	0.0652809	0.586	0.572	1
Cyfip1	0.0359398	-0.0513358	0.283	0.331	1
Mrpl46	0.0359882	0.0584508	0.54	0.495	1
Atp5h	0.0360251	0.0357557	1	0.999	1
Trgv2	0.0360428	-0.0573695	0.322	0.377	1
Esf1	0.0361164	0.0528847	0.654	0.613	1
Mphosph10	0.0361498	0.087694	0.638	0.617	1
Birc6	0.0361624	-0.0640703	0.749	0.786	1
0610030E20Rik	0.0361732	-0.0244667	0.227	0.274	1
Smyd2	0.0362496	0.0712252	0.466	0.428	1
Lrpap1	0.0363623	0.0697219	0.421	0.385	1
D8Ertd738e	0.0363867	0.0589805	0.942	0.95	1
Rad1	0.0363917	0.0437482	0.285	0.24	1
Hist1h3c	0.03641	0.0660515	0.275	0.235	1
Top3b	0.0364373	-0.029662	0.186	0.231	1
Edrf1	0.0364547	-0.0275784	0.085	0.115	1
Comtd1	0.0365218	0.0443069	0.334	0.284	1
Polr2i	0.0365685	-0.0462743	0.565	0.647	1
Eif4g2	0.0366051	-0.0688618	0.935	0.935	1
Hist1h3f	0.0367491	-0.033815	0.153	0.192	1
Ndufaf1	0.0367757	0.0557408	0.263	0.225	1
Uchl5	0.0368178	0.0710236	0.731	0.73	1
Usp24	0.0369119	-0.0426903	0.243	0.29	1
Emc6	0.036985	0.0556181	0.829	0.828	1
Atox1	0.0369912	-0.049611	0.927	0.945	1
Smdt1	0.0370624	0.049172	0.974	0.976	1
Rfx7	0.0370696	-0.0266328	0.458	0.522	1
Minpp1	0.0371233	0.0544433	0.384	0.346	1
Sumo3	0.0371321	-0.0721513	0.68	0.72	1
Sap18	0.0372958	0.0694096	0.846	0.848	1
Arih2	0.0374563	-0.0518473	0.282	0.329	1
Dedd	0.0374717	-0.0285955	0.165	0.205	1
Gipc2	0.0376516	-0.0225679	0.082	0.113	1
Fbxo22	0.0377117	-0.0564337	0.391	0.438	1
Gm12184	0.0377738	0.0335003	0.102	0.073	1
Esd	0.0378177	0.0670202	0.943	0.944	1
Ltv1	0.037905	0.0622452	0.521	0.485	1
Mafk	0.0379232	-0.0279252	0.115	0.151	1
Tmem127	0.0379935	-0.0413078	0.185	0.227	1
Plekhj1	0.0380985	0.0619605	0.858	0.836	1
D16Ertd472e	0.0381369	-0.0936962	0.866	0.879	1
Rpl10	0.0381378	0.0511878	0.999	1	1
Higd1a	0.0382222	0.0531447	0.96	0.961	1
Tasp1	0.0382585	0.0364778	0.148	0.115	1
Gm33104	0.0383122	-0.0229407	0.073	0.102	1
Ino80d	0.0383197	-0.0483666	0.288	0.334	1
Pphln1	0.0384306	0.0426772	0.346	0.303	1
Xpo4	0.0385401	-0.0687789	0.339	0.397	1
Plekhm2	0.0385716	-0.0384331	0.079	0.108	1
Arpc3	0.038759	0.0405584	0.992	0.994	1
Strn	0.0388207	-0.0459943	0.209	0.251	1
Atp5j	0.0388554	0.0566072	0.994	0.997	1
Pim3	0.0388564	0.0717901	0.524	0.489	1
Fasl	0.0391635	-0.0435088	0.469	0.535	1
Ap3s2	0.0392536	0.0366942	0.189	0.152	1
Runx2	0.0393514	-0.0474451	0.477	0.542	1
Cdc34	0.0394565	0.0735675	0.567	0.552	1
Top2b	0.0395068	-0.081967	0.688	0.726	1
Srsf11	0.0396287	0.0570659	0.965	0.961	1
Tmem256	0.0396375	-0.0658267	0.932	0.925	1
Ifitm1	0.0396527	0.103952	0.232	0.188	1
Dpp9	0.0396844	-0.0299184	0.233	0.278	1
Mtmr1	0.0396993	-0.0831877	0.473	0.532	1
Eif4a2	0.0397015	-0.0785365	0.798	0.824	1
Dcaf11	0.0397787	-0.0536662	0.249	0.291	1
Sdhc	0.0398047	-0.0561396	0.624	0.674	1
Lrch1	0.0398922	-0.0433709	0.168	0.202	1
Ifnar1	0.0398961	-0.0616404	0.439	0.496	1
Actl6a	0.0399478	0.0637764	0.787	0.766	1
Eipr1	0.0400879	-0.0484118	0.367	0.43	1
Imp3	0.0400941	0.0668264	0.824	0.811	1
Rps24	0.0401264	0.0360785	1	1	1
Hnrnpm	0.040191	-0.0734895	0.925	0.937	1
Plekhn1	0.0402011	-0.0410033	0.075	0.103	1
Fam214a	0.040266	-0.0187076	0.092	0.123	1
Gpx4	0.0403356	0.0606304	0.92	0.911	1
Derl1	0.040497	0.0437831	0.625	0.607	1
Oxa1l	0.0406275	0.0523658	0.435	0.402	1
Dnmt3a	0.0407268	-0.0551266	0.306	0.36	1
Apex1	0.040802	0.0664789	0.688	0.669	1
Zfp672	0.0408393	-0.031039	0.148	0.187	1
Hsp90ab1	0.0408554	0.0500072	1	1	1
Polr2h	0.0408632	0.0585681	0.673	0.641	1
Gmds	0.040865	0.082162	0.47	0.462	1
Flot2	0.0408736	-0.0268156	0.207	0.257	1
Cd3eap	0.0409385	0.0500393	0.468	0.426	1
Usp12	0.0410444	-0.0302156	0.105	0.138	1
Dock5	0.0412609	-0.0260705	0.097	0.129	1
Ankra2	0.0413834	-0.0514242	0.36	0.413	1
Sf3b6	0.0414053	0.0486793	0.965	0.951	1
D030056L22Rik	0.0414447	0.061965	0.28	0.241	1
Mxd4	0.0414843	-0.0581404	0.271	0.316	1
Ndufb7	0.0415956	0.0506916	0.993	0.997	1
Xlr4a	0.0416386	0.0414795	0.314	0.268	1
Snrpb	0.0416517	0.0583819	0.994	0.978	1
Mtif2	0.0416859	0.0399143	0.233	0.191	1
Tax1bp3	0.0417993	-0.0189259	0.102	0.135	1
Gpatch8	0.0419869	-0.0484135	0.527	0.595	1
Numa1	0.0420199	-0.0748114	0.427	0.466	1
Mndal	0.0421529	-0.0798623	0.902	0.931	1
Tlnrd1	0.0422707	-0.0303028	0.127	0.164	1
Desi2	0.0423596	0.0424523	0.459	0.419	1
Myo1g	0.0424436	-0.0455631	0.567	0.618	1
Scyl2	0.042463	-0.0523931	0.191	0.228	1
Hist1h3i	0.0425003	0.0401368	0.159	0.125	1
Fgfr1op	0.0425088	-0.0298154	0.205	0.25	1
Atg16l2	0.0425945	-0.0422498	0.268	0.313	1
Msmo1	0.0427735	0.0477604	0.271	0.231	1
Rp9	0.0427759	0.0653295	0.865	0.868	1
Cndp2	0.0428989	0.0609653	0.533	0.496	1
Trim27	0.0429109	0.0592971	0.703	0.679	1
Nprl2	0.0430171	-0.0272432	0.124	0.161	1
Nfat5	0.0430222	-0.085229	0.578	0.608	1
Bbip1	0.0430238	0.0601706	0.558	0.531	1
Fuca2	0.0430562	0.0299432	0.426	0.376	1
Arap3	0.0431273	-0.0215941	0.078	0.108	1
Znrf2	0.0432397	-0.0437493	0.604	0.654	1
Bicral	0.0433249	-0.0444785	0.153	0.191	1
Rnf44	0.0434293	-0.0619075	0.238	0.283	1
Slc1a5	0.0434701	0.0798352	0.772	0.749	1
Prpf38a	0.0435695	0.0555186	0.608	0.587	1
Tpm3	0.0436501	-0.0646186	0.988	0.993	1
Vwa5a	0.0438262	-0.0415664	0.15	0.185	1
Tspan31	0.0438902	0.0636879	0.404	0.369	1
Pih1d1	0.0440475	0.0596831	0.485	0.439	1
Zc3hav1	0.0440526	-0.051532	0.579	0.621	1
Ltk	0.0440803	-0.0318025	0.097	0.128	1
A630089N07Rik	0.0441506	-0.0391469	0.126	0.161	1
Sos2	0.0441713	-0.0347259	0.182	0.22	1
Leng9	0.0442396	-0.0214557	0.073	0.102	1
Znhit3	0.0442656	0.0538174	0.482	0.449	1
Txn2	0.0443032	0.0712237	0.89	0.901	1
Srp68	0.0443365	-0.0519732	0.414	0.466	1
Kbtbd3	0.0446503	-0.0286334	0.097	0.129	1
Cat	0.0446692	-0.0475698	0.328	0.379	1
Mllt6	0.04472	-0.0791759	0.323	0.369	1
Pgrmc1	0.0447606	0.0805407	0.624	0.607	1
Ankrd39	0.0448271	0.0455435	0.386	0.347	1
Snx12	0.0448385	-0.039663	0.304	0.35	1
Ikzf3	0.0449787	-0.0735039	0.631	0.664	1
Ppm1b	0.0450291	-0.045886	0.47	0.531	1
Sub1	0.0450305	0.0370942	1	0.994	1
Rwdd2b	0.045109	-0.0313586	0.127	0.161	1
Bend4	0.0452067	-0.0360648	0.11	0.142	1
Gnai3	0.045228	-0.0558718	0.615	0.663	1
Srrt	0.0452349	-0.0676103	0.614	0.653	1
Tmem9b	0.0452643	-0.0360596	0.379	0.429	1
Pik3cg	0.0453004	-0.0392017	0.416	0.473	1
Rbm27	0.0453292	-0.0632684	0.489	0.531	1
Cdk19	0.0453605	-0.031316	0.08	0.109	1
1600002K03Rik	0.0454084	-0.0371334	0.323	0.373	1
Aga	0.0454938	-0.0382106	0.332	0.386	1
Ccdc47	0.0455494	-0.0712544	0.581	0.641	1
Scaper	0.0455544	-0.0308638	0.17	0.211	1
Atp2c1	0.0456422	-0.0425862	0.271	0.316	1
Tmem260	0.0458297	-0.0222946	0.107	0.141	1
Vezf1	0.0459031	-0.0301597	0.27	0.323	1
Golph3	0.045941	-0.0500452	0.414	0.469	1
Rad51	0.0459691	0.0786881	0.411	0.385	1
Rhot1	0.0460925	-0.0343016	0.19	0.232	1
Itpr2	0.0461171	-0.0534294	0.328	0.383	1
Brcc3	0.0462507	0.047586	0.557	0.529	1
Ttc27	0.0462935	0.0367784	0.178	0.142	1
Stx16	0.0462981	-0.0515608	0.396	0.449	1
Dapp1	0.0463167	-0.0442113	0.323	0.369	1
Ap1s2	0.0463232	-0.0414697	0.454	0.521	1
Ddrgk1	0.0463301	0.0602396	0.755	0.755	1
Coa3	0.0464291	0.0612511	0.78	0.78	1
Rbm48	0.0465145	-0.0292723	0.19	0.235	1
Rexo5	0.0465905	-0.0309357	0.145	0.181	1
Egln1	0.0469363	-0.0581281	0.679	0.717	1
Txn1	0.0470394	0.0454878	0.997	0.997	1
Cd47	0.0472152	0.0520777	0.989	0.987	1
Gtpbp10	0.0472633	-0.0282489	0.101	0.131	1
Farp1	0.0473044	-0.0301063	0.098	0.129	1
Zadh2	0.0473334	-0.0317216	0.151	0.188	1
Map4k2	0.047429	-0.0393943	0.225	0.268	1
Rbm5	0.047556	-0.0397733	0.481	0.534	1
A630001G21Rik	0.0476278	-0.0433272	0.23	0.273	1
Ubap1	0.0476336	-0.0250477	0.146	0.184	1
Mtfr1l	0.0476567	-0.0356303	0.429	0.486	1
Mecr	0.0476754	0.0495299	0.295	0.26	1
Park7	0.0476887	0.0574963	0.986	0.978	1
Msh5	0.0478998	-0.0283369	0.089	0.118	1
Rbm17	0.0479033	0.0750891	0.719	0.716	1
Myl12a	0.0479363	-0.0536777	0.994	0.994	1
Tcp1	0.0479642	0.0657639	0.927	0.923	1
Spn	0.0480467	-0.0812317	0.637	0.671	1
Tbcd	0.0480792	-0.0205459	0.13	0.166	1
Abcb1b	0.0481801	-0.0526279	0.342	0.386	1
Cep95	0.0481813	-0.0236953	0.078	0.106	1
Cd82	0.0482484	-0.0698211	0.515	0.574	1
Akap8	0.0482861	-0.0560842	0.466	0.518	1
A430046D13Rik	0.048416	-0.0375297	0.148	0.182	1
Zfp407	0.0485534	-0.0362829	0.179	0.218	1
Exoc7	0.0486265	-0.035513	0.287	0.343	1
Mettl6	0.0488386	-0.0199387	0.224	0.275	1
Dolpp1	0.0488714	-0.0272954	0.112	0.145	1
Snx3	0.0489199	0.05512	0.917	0.914	1
P4ha1	0.0494218	-0.0346528	0.242	0.286	1
Rnpc3	0.0496344	-0.0410312	0.28	0.319	1
Spg7	0.0496388	-0.0508399	0.284	0.327	1
Rpl31	0.0496724	-0.0503746	1	0.996	1
Cwc15	0.0497066	-0.0503973	0.891	0.935	1
Golga3	0.0498109	-0.0404881	0.194	0.234	1
Dgka	0.0498358	-0.0427658	0.21	0.25	1
Smim7	0.049865	-0.0379327	0.387	0.44	1
Gtf2e2	0.0499196	0.0537099	0.585	0.56	1
Rfc5	0.0499708	0.0775907	0.663	0.65	1
Glrx5	0.0500691	0.0619644	0.79	0.772	1
Set	0.0500713	0.0540326	0.998	0.999	1
Ripk1	0.0500778	-0.0666955	0.291	0.323	1
Ngdn	0.0501147	-0.0510001	0.535	0.59	1
2900026A02Rik	0.0501221	-0.0790172	0.454	0.505	1
Mrpl54	0.0501596	0.0729955	0.894	0.892	1
Zfp638	0.0502699	-0.0572437	0.517	0.567	1
Ermp1	0.0503598	-0.0338554	0.231	0.274	1
Azi2	0.0504052	-0.0698072	0.481	0.524	1
Pds5a	0.0504976	-0.0526926	0.645	0.69	1
Arpc5l	0.050555	0.0611449	0.913	0.9	1
Il2rb	0.0506715	-0.0553849	0.997	0.994	1
Mettl9	0.0506933	0.0437183	0.558	0.516	1
Zfp281	0.0507098	-0.0279863	0.103	0.135	1
Trim59	0.0507641	-0.055739	0.34	0.392	1
Eid1	0.0508254	-0.0662366	0.819	0.846	1
Agk	0.0508383	-0.040356	0.232	0.281	1
Egr1	0.0509286	-0.051531	0.3	0.349	1
Mydgf	0.0509401	0.0705217	0.806	0.803	1
Ep300	0.0509743	-0.0344205	0.42	0.476	1
Ofd1	0.0511135	-0.0423731	0.167	0.205	1
Cs	0.0512264	-0.0669695	0.658	0.694	1
Hectd3	0.0512458	-0.0280428	0.127	0.161	1
Ganc	0.0512823	0.0236722	0.109	0.08	1
Itm2c	0.0512951	-0.0761457	0.485	0.525	1
Prr13	0.0513539	-0.0654942	0.854	0.857	1
Sp100	0.0514597	-0.0458614	0.886	0.911	1
Zcchc10	0.0514611	-0.0503892	0.335	0.38	1
Hprt	0.0514936	0.0632406	0.951	0.944	1
Fbxw11	0.0515658	-0.0355042	0.215	0.258	1
Ralgapb	0.0516236	-0.0206836	0.127	0.162	1
Sdhb	0.0516818	0.0523166	0.94	0.931	1
Rrp8	0.0518386	-0.0503614	0.421	0.472	1
Atp5f1	0.0518902	0.0427433	0.996	0.999	1
Ndufa6	0.0519093	-0.0446815	0.94	0.943	1
Ckm	0.0519187	-0.0328895	0.109	0.141	1
Ywhae	0.0519797	0.0556551	0.968	0.974	1
Kmt5a	0.0520177	-0.0590984	0.679	0.722	1
Zzz3	0.0520958	-0.0397258	0.252	0.294	1
Ist1	0.0521344	-0.037183	0.194	0.232	1
Ift27	0.0521925	0.0641301	0.416	0.376	1
Setd1a	0.0522344	0.027558	0.163	0.128	1
Ssh2	0.0523076	-0.0198257	0.142	0.179	1
Ankrd13a	0.0523284	-0.0269627	0.304	0.357	1
Cks1b	0.0526828	0.0224126	0.55	0.488	1
Zcchc17	0.0527198	0.063842	0.76	0.745	1
Fkbp1a	0.0529133	0.0440573	0.985	0.98	1
Lax1	0.0529197	-0.0572794	0.311	0.357	1
Nefh	0.0529374	0.0477893	0.202	0.168	1
Eif1ad	0.052999	0.057765	0.551	0.522	1
Uqcrb	0.0530256	0.0433712	0.984	0.973	1
Lrrc8b	0.0530277	-0.0236075	0.1	0.131	1
Pex3	0.0530624	-0.0422072	0.225	0.273	1
Ccdc92	0.0532197	0.0239415	0.145	0.112	1
Wdr95	0.0532316	-0.0302335	0.123	0.159	1
Phactr2	0.0536111	0.0523342	0.322	0.283	1
Sppl2a	0.0538145	-0.0432878	0.582	0.626	1
Uhmk1	0.0538309	-0.0533876	0.318	0.364	1
Rel	0.0538972	-0.0426245	0.338	0.383	1
Dnaja2	0.053913	0.0493916	0.85	0.854	1
Mrpl57	0.0541187	0.06811	0.903	0.894	1
Clspn	0.0542093	0.046414	0.534	0.494	1
N4bp2l1	0.0543031	-0.0399831	0.289	0.337	1
Arfip1	0.0543442	-0.0346756	0.158	0.194	1
BC003331	0.0544187	0.0579548	0.37	0.324	1
Eno1b	0.0544225	0.0247093	0.103	0.076	1
Itgb3bp	0.054479	-0.0379346	0.266	0.308	1
Fam98b	0.0545118	-0.0470508	0.484	0.558	1
Sfmbt1	0.0545554	-0.0271449	0.124	0.158	1
Slc28a2	0.0546288	-0.0267	0.255	0.306	1
Gtf2b	0.0547162	0.0579378	0.696	0.664	1
Mapkapk3	0.0547377	-0.0382397	0.17	0.207	1
Lztr1	0.0547444	-0.0372946	0.179	0.217	1
Spr	0.0548724	0.0466129	0.32	0.284	1
Cox6a1	0.0549909	-0.0622873	0.975	0.976	1
Nup62	0.055211	0.0542332	0.414	0.386	1
1810013L24Rik	0.0552932	-0.0337131	0.159	0.192	1
Sgf29	0.0553213	0.0587548	0.507	0.482	1
Cnot6l	0.0553246	-0.0905384	0.673	0.722	1
Ttc39c	0.0553924	-0.0283974	0.096	0.125	1
Itk	0.0555601	-0.0750151	0.702	0.759	1
Bsdc1	0.0556307	-0.024544	0.125	0.159	1
Wdfy1	0.0556729	0.0465995	0.463	0.428	1
Wwp2	0.0557226	-0.0297513	0.316	0.373	1
Gba	0.0557626	-0.0201594	0.167	0.205	1
Arpc1a	0.0557642	0.0549843	0.547	0.541	1
Cog6	0.0558227	-0.0171915	0.128	0.164	1
Trappc5	0.0559437	0.073205	0.576	0.541	1
Ppp3ca	0.0559443	-0.0569098	0.548	0.584	1
Map2k3	0.0560324	0.0633791	0.564	0.552	1
Ncbp2	0.0563612	0.0648825	0.711	0.681	1
Fam160b1	0.0564045	-0.0336522	0.126	0.159	1
Gmps	0.0564168	0.0627865	0.762	0.758	1
Suz12	0.0564912	-0.0380502	0.742	0.78	1
Mzt1	0.0565163	-0.0379206	0.373	0.418	1
Pear1	0.0565474	-0.0190902	0.139	0.175	1
Srxn1	0.0566141	-0.0268829	0.085	0.113	1
Adck5	0.0567337	0.0429893	0.212	0.175	1
Fam118b	0.0567888	0.0424113	0.177	0.146	1
Atp5d	0.056873	0.0473005	0.995	1	1
Pmm1	0.05703	0.0432438	0.146	0.116	1
Tgif2	0.0570896	-0.0186642	0.074	0.102	1
Ccnl1	0.0571104	-0.0750142	0.767	0.783	1
Yars	0.0573377	0.0292934	0.274	0.231	1
Kif5b	0.0573531	0.0520338	0.823	0.825	1
Ncapd2	0.0573562	-0.0328049	0.162	0.201	1
AB124611	0.0574014	-0.040697	0.193	0.234	1
Serpina3g	0.05743	-0.135877	0.429	0.456	1
Fbxo11	0.0574562	-0.0325599	0.158	0.194	1
Coq8b	0.0574719	-0.0252357	0.079	0.106	1
Edem1	0.0574954	-0.089596	0.428	0.461	1
Unc13d	0.057557	-0.0370719	0.383	0.438	1
Ppp1r15b	0.0576199	-0.0319776	0.33	0.379	1
Nop14	0.0577042	0.0411653	0.565	0.514	1
Kat14	0.057769	-0.0288148	0.089	0.116	1
Msh6	0.0577765	-0.0362144	0.218	0.26	1
Lbr	0.0578757	-0.0600275	0.677	0.704	1
Bub3	0.0578764	0.0597918	0.784	0.78	1
Pfdn4	0.0579817	0.0567703	0.67	0.671	1
Itsn2	0.0579966	-0.064662	0.501	0.544	1
Usp14	0.0580102	0.0528071	0.644	0.644	1
Nsd3	0.0580136	-0.0904125	0.711	0.746	1
Ezh1	0.0580926	-0.0394026	0.163	0.199	1
Idh3a	0.0581076	0.0675447	0.83	0.811	1
Fubp1	0.058154	0.0295227	0.941	0.953	1
Prim2	0.0582558	0.0408488	0.229	0.194	1
Sec22a	0.0582733	0.038605	0.228	0.192	1
Crtc2	0.0583395	-0.0225609	0.133	0.169	1
Dtymk	0.058449	0.0513551	0.891	0.872	1
Frrs1	0.0584591	-0.0280899	0.195	0.235	1
Gid4	0.0584975	-0.0482302	0.275	0.319	1
Lrrc47	0.0585051	-0.0515616	0.266	0.304	1
Ube2d1	0.0585265	-0.0437366	0.224	0.271	1
Lsm5	0.058604	0.0733602	0.913	0.911	1
Zbtb25	0.0587874	0.0640476	0.312	0.28	1
Emc8	0.0587952	0.0583557	0.674	0.674	1
Asb6	0.0588257	0.0421157	0.176	0.143	1
Tbc1d23	0.0588364	-0.0228488	0.158	0.195	1
Irak2	0.0589224	-0.0189426	0.087	0.116	1
Ubl7	0.0589912	-0.0305823	0.234	0.275	1
Zzef1	0.0590325	-0.0256721	0.22	0.263	1
Sra1	0.059057	0.0494056	0.829	0.813	1
Hnrnpf	0.0590663	0.0422926	0.992	0.997	1
Ythdf2	0.0591915	0.059558	0.486	0.453	1
Lin7c	0.0593024	-0.0466791	0.359	0.406	1
Dhodh	0.0593444	0.0371882	0.258	0.222	1
Sema4a	0.0594012	-0.0590485	0.587	0.623	1
Eif3l	0.0594558	0.0508078	0.797	0.785	1
Cd320	0.0596177	0.040826	0.183	0.152	1
Skap1	0.0597606	-0.0684762	0.948	0.954	1
Msantd4	0.0597821	-0.0324271	0.145	0.181	1
Trim26	0.0598672	-0.0454373	0.44	0.496	1
Oxr1	0.0598697	-0.0557194	0.153	0.184	1
Usp25	0.0599004	-0.0564427	0.614	0.653	1
Exo1	0.0599051	0.0305215	0.163	0.131	1
Tgoln1	0.0599246	-0.0705845	0.599	0.648	1
Itgb1	0.0602934	-0.11929	0.781	0.798	1
Plcl2	0.0603286	-0.0342278	0.194	0.232	1
Aff1	0.0604044	-0.0262321	0.084	0.112	1
Pim2	0.0604493	-0.0500641	0.159	0.192	1
Tubg1	0.0604878	0.0594118	0.468	0.443	1
Smad7	0.0604891	-0.0600937	0.403	0.442	1
Tbcc	0.0605039	-0.0346067	0.186	0.222	1
Rhof	0.0605404	0.0387605	0.697	0.648	1
Apoo	0.060614	0.0422886	0.28	0.244	1
Ndufs6	0.0606374	0.0480948	0.976	0.971	1
Ncaph2	0.0606716	-0.0520424	0.453	0.488	1
Gm17056	0.0607602	-0.0293753	0.081	0.108	1
Ppm1m	0.0607961	0.0477132	0.368	0.331	1
Thrap3	0.060873	-0.0582244	0.806	0.865	1
Tbc1d22b	0.0610101	-0.0245958	0.094	0.123	1
Mrps15	0.0611174	0.0692622	0.792	0.785	1
Ets2	0.0613212	-0.0320993	0.089	0.116	1
Emc4	0.0613348	0.0616664	0.594	0.572	1
Acap1	0.0613417	-0.0517541	0.533	0.575	1
Cbx6	0.0613556	-0.0249666	0.128	0.161	1
Man1a	0.0613977	-0.047893	0.319	0.364	1
Ipo8	0.0614001	-0.0486018	0.239	0.277	1
Ndufa12	0.061435	0.0568998	0.941	0.95	1
Rchy1	0.0615064	-0.0417302	0.499	0.549	1
Gpr65	0.0615424	-0.0523273	0.54	0.575	1
Gosr2	0.0616715	-0.0348453	0.328	0.374	1
Arid5b	0.0619443	-0.0568062	0.462	0.519	1
Arid1b	0.0620141	-0.0249771	0.228	0.271	1
Ndufaf4	0.0620242	0.0686994	0.612	0.597	1
Sptbn1	0.0620874	-0.0626177	0.479	0.516	1
2022-09-02	0.0621368	-0.0294695	0.097	0.125	1
Lst1	0.0621563	-0.0106029	0.142	0.178	1
Snai3	0.0621816	0.0428242	0.187	0.156	1
Tcf20	0.0622531	-0.047034	0.291	0.336	1
Taf1	0.0622881	-0.0749951	0.495	0.527	1
Rpl35a	0.0624124	-0.0170246	1	1	1
Cdk5rap2	0.062427	-0.0298759	0.178	0.215	1
Fam60a	0.0624448	-0.0576462	0.581	0.627	1
Ddit4	0.0624976	-0.0480418	0.298	0.339	1
Cep57	0.0625385	0.0480823	0.557	0.518	1
Itih5	0.0626016	-0.0621097	0.484	0.542	1
Ydjc	0.0626316	0.0512913	0.304	0.273	1
Peak1	0.0626973	-0.0305983	0.434	0.492	1
Mob3a	0.0626997	-0.0634692	0.466	0.505	1
Sec24d	0.0627789	-0.0286817	0.079	0.105	1
Grwd1	0.0628291	0.05092	0.311	0.281	1
Akt2	0.0629439	-0.0334485	0.385	0.448	1
Mdh1	0.0629693	0.0646353	0.957	0.951	1
Cdc26	0.0629854	0.0426793	0.667	0.638	1
Sf3b2	0.0630276	-0.0529249	0.94	0.944	1
Celsr1	0.0630548	-0.0292178	0.075	0.102	1
Zfp266	0.0631391	-0.0500499	0.32	0.364	1
Pnpla2	0.0631508	0.0495328	0.47	0.432	1
Erc1	0.0631935	-0.0282517	0.113	0.145	1
Kdm5a	0.0632697	-0.0466525	0.449	0.509	1
Mrpl33	0.0633292	-0.0360008	0.994	0.989	1
Slf2	0.063372	-0.033874	0.23	0.275	1
Slc14a1	0.0634675	-0.0143026	0.081	0.109	1
Myef2	0.0636869	-0.0474714	0.309	0.346	1
Nagpa	0.0637102	-0.0353041	0.162	0.197	1
Cops7a	0.0637104	0.0486452	0.442	0.406	1
Eif3g	0.0637225	0.0626785	0.878	0.875	1
Ndel1	0.0638036	-0.051321	0.349	0.402	1
Chic2	0.063869	-0.0486983	0.801	0.841	1
Herc4	0.064065	-0.0362812	0.272	0.316	1
Zfp282	0.0641163	-0.0319993	0.135	0.169	1
Adprh	0.0641994	-0.0550108	0.415	0.459	1
Tecr	0.0644472	0.0563853	0.894	0.895	1
Scarb2	0.0644778	-0.0429874	0.266	0.31	1
Swap70	0.0644831	-0.0231271	0.08	0.108	1
Ibtk	0.0645185	-0.0454735	0.235	0.273	1
Taf2	0.0645272	-0.033263	0.177	0.217	1
Plekhb2	0.0645466	-0.0392079	0.436	0.488	1
Eef2kmt	0.0646067	-0.0313033	0.26	0.307	1
Hes6	0.0646966	0.0591631	0.473	0.435	1
Cebpb	0.0647608	-0.0651268	0.556	0.601	1
Tgfbr2	0.0650117	-0.0697133	0.538	0.597	1
Lnpep	0.0650174	-0.0754703	0.667	0.709	1
Mkln1	0.0651227	-0.0629192	0.495	0.537	1
Cep162	0.0652618	-0.0321023	0.177	0.212	1
Gnl3l	0.0652629	-0.0469579	0.276	0.317	1
Tmem238	0.0654067	0.0575525	0.549	0.524	1
Sec16a	0.0654319	-0.0292908	0.149	0.182	1
Fem1c	0.0654508	-0.0393452	0.266	0.307	1
Gbp8	0.0655095	-0.0533288	0.284	0.321	1
Slc22a15	0.0655527	-0.0591672	0.269	0.304	1
Ruvbl1	0.0656316	0.0545871	0.702	0.667	1
Tlcd2	0.0657119	0.0465418	0.197	0.166	1
Exoc5	0.0658182	-0.0510289	0.424	0.481	1
Hspa9	0.0658342	0.0648502	0.787	0.76	1
Prmt3	0.0658917	0.0515413	0.486	0.442	1
Dad1	0.0661078	0.0539598	0.977	0.981	1
Ube2h	0.0663064	-0.0635528	0.338	0.382	1
Mrps12	0.0664113	0.0665975	0.533	0.514	1
Qars	0.0664894	0.0485877	0.44	0.407	1
Tex30	0.066628	0.0549803	0.432	0.402	1
Prdm4	0.0667099	-0.0251549	0.089	0.116	1
Zfp868	0.066867	-0.027217	0.083	0.11	1
Odc1	0.066917	0.0588723	0.701	0.677	1
Akap11	0.0669935	-0.0494058	0.225	0.263	1
Pola1	0.0671	0.0521944	0.561	0.511	1
Tet3	0.0672471	-0.0404529	0.286	0.326	1
Tmem55b	0.0673067	-0.0353927	0.258	0.298	1
Fmc1	0.0673068	-0.0498037	0.544	0.608	1
Lsm4	0.0673371	0.0638399	0.925	0.938	1
Braf	0.0673811	-0.0574583	0.237	0.273	1
Pdzd11	0.0675169	0.0398759	0.37	0.327	1
Mvd	0.0675278	0.0235834	0.116	0.089	1
Arhgef3	0.0676065	-0.0383354	0.109	0.136	1
Ptpn6	0.0678892	0.0611676	0.942	0.924	1
Dpysl2	0.0678988	-0.049164	0.591	0.65	1
Cd38	0.0680005	-0.050785	0.421	0.466	1
Mtdh	0.0681291	0.0642428	0.929	0.934	1
2700062C07Rik	0.068142	0.0289067	0.195	0.159	1
Gpatch1	0.0685373	-0.0129933	0.139	0.174	1
Usp9x	0.0686177	0.0657593	0.377	0.344	1
Ccdc186	0.068687	-0.033717	0.157	0.189	1
Tnfaip3	0.0687661	-0.0725148	0.439	0.491	1
Ccny	0.0688221	-0.039536	0.333	0.379	1
Acbd3	0.0688425	-0.0671682	0.401	0.438	1
Phf11c	0.0689432	-0.0382677	0.227	0.268	1
Calr	0.0689575	-0.0618348	0.989	0.99	1
Ppp4r3a	0.069063	-0.0558213	0.585	0.623	1
Rangap1	0.0690764	-0.0570808	0.546	0.605	1
Add1	0.06912	-0.0562278	0.49	0.535	1
Cwc25	0.0693521	-0.0484437	0.274	0.311	1
Actr6	0.0693757	0.0425536	0.223	0.192	1
G6pc3	0.0694304	0.0413663	0.257	0.225	1
Mnd1	0.069431	-0.0340067	0.125	0.156	1
Ralgapa1	0.0694556	-0.0308515	0.28	0.326	1
Etnk1	0.0694609	-0.0546743	0.468	0.515	1
Cdca5	0.0695366	0.0218927	0.102	0.076	1
Ccdc82	0.0696506	-0.0681079	0.449	0.485	1
Ikzf5	0.0698083	-0.029794	0.211	0.253	1
Dis3l2	0.0698731	-0.0314092	0.145	0.176	1
Mgst2	0.0698915	0.0636561	0.162	0.133	1
Casp6	0.0699218	-0.0239083	0.141	0.175	1
Hivep2	0.0700519	-0.0323876	0.163	0.198	1
9930111J21Rik2	0.070136	-0.0586169	0.388	0.428	1
Ubl4a	0.0703162	0.0633172	0.636	0.617	1
Itgb2	0.070325	-0.0443479	0.895	0.915	1
Mink1	0.0703509	-0.0366137	0.251	0.294	1
Klhl6	0.0703687	-0.0422536	0.191	0.225	1
Serp2	0.0705504	-0.0408038	0.306	0.353	1
Calhm2	0.0706841	-0.0208454	0.138	0.172	1
Myb	0.0708745	0.0329202	0.161	0.129	1
Pus10	0.0709312	0.0351289	0.183	0.151	1
Ckap2l	0.0709807	-0.0222736	0.075	0.1	1
Scaf11	0.0711418	-0.0569579	0.775	0.815	1
Brf1	0.0711836	-0.0257383	0.148	0.179	1
[truncated: 5,645 more rows]

## Sheet: Cluster 5
	p_val	avg_log2FC	pct_high	pct.2_low	p_val_adj
Rps29	1.96939e-46	-0.239266	1	1	2.30359e-42
Rps27rt	7.28694e-40	-0.421914	0.981	0.992	8.52353e-36
Rps27	1.03259e-39	-0.246052	1	1	1.20782e-35
Rpl39	1.67683e-36	-0.213786	1	1	1.96139e-32
Rps28	3.89846e-34	-0.24239	1	1	4.56003e-30
Rps21	7.12273e-34	-0.218709	1	1	8.33146e-30
Gm42418	2.05592e-30	-0.265463	1	1	2.40481e-26
Hist1h4d	9.36253e-29	-0.428261	0.987	0.994	1.09513e-24
Fcer1g	5.37901e-27	0.888172	0.681	0.443	6.29183e-23
Rpl38	5.15333e-24	-0.176321	1	0.998	6.02785e-20
Cox5a	9.53297e-21	0.249552	0.999	0.994	1.11507e-16
Hist1h2ab	1.17015e-20	-0.455152	0.89	0.951	1.36873e-16
Tpt1	5.51181e-20	-0.148729	1	1	6.44716e-16
Rpl37	3.08573e-19	-0.173877	1	1	3.60938e-15
Psmb3	6.30204e-19	0.274809	0.989	0.978	7.37149e-15
Eif5a	1.88008e-18	0.32069	0.998	0.99	2.19913e-14
Gm11808	2.92313e-18	-0.246583	0.986	0.99	3.41919e-14
Rpl37a	3.30487e-18	-0.160726	1	1	3.86571e-14
Hist1h2an	4.05683e-17	-0.393302	0.806	0.903	4.74527e-13
Ndufb8	1.03271e-16	0.226272	0.981	0.963	1.20796e-12
Hist1h3c	2.63193e-16	-0.365033	0.969	0.989	3.07857e-12
Cox5b	4.94317e-16	0.196242	0.999	0.994	5.78203e-12
Psma3	5.84592e-16	0.217838	0.985	0.986	6.83797e-12
Cox7a2l	6.7978e-16	-0.272279	0.97	0.984	7.95138e-12
Pfn1	7.39551e-16	0.177514	1	1	8.65053e-12
Ran	4.65355e-15	0.190384	0.999	0.997	5.44326e-11
Lars2	8.10878e-15	-0.342872	0.849	0.93	9.48484e-11
Nme1	2.27794e-13	0.298183	0.966	0.947	2.66451e-09
Pdcd4	2.97497e-13	-0.291639	0.556	0.73	3.47982e-09
Psmb5	3.63918e-13	0.232159	0.959	0.933	4.25675e-09
Ppia	1.0622e-12	0.161039	1	1	1.24245e-08
Dad1	1.60544e-12	0.19834	0.979	0.981	1.87788e-08
Oaz1	2.84577e-12	0.147637	1	1	3.3287e-08
Rpl8	3.48065e-12	0.135964	1	1	4.07132e-08
Hist1h2ae	3.82442e-12	-0.293908	0.993	1	4.47343e-08
Gzmb	7.66515e-12	0.539268	0.945	0.896	8.96592e-08
Uba52	7.808e-12	-0.162044	0.995	0.998	9.13302e-08
H2-Q7	8.36821e-12	-0.231094	0.979	0.986	9.7883e-08
Myl6	8.77474e-12	0.171178	1	0.995	1.02638e-07
Taf10	9.81834e-12	0.179191	0.986	0.974	1.14845e-07
Chchd2	1.32154e-11	0.154561	0.998	0.995	1.5458e-07
Vdac2	1.45554e-11	0.187506	0.98	0.979	1.70255e-07
Psmb2	2.00876e-11	0.201648	0.974	0.954	2.34965e-07
Hist1h2af	3.42391e-11	-0.228993	0.666	0.805	4.00495e-07
Sub1	4.6491e-11	0.177716	0.999	1	5.43805e-07
Ikzf2	4.69499e-11	-0.345874	0.66	0.758	5.49173e-07
Atp5j	8.87223e-11	0.160522	0.997	0.994	1.03779e-06
Rps2	1.18448e-10	0.15244	1	0.998	1.38549e-06
Lockd	1.20727e-10	-0.261371	0.791	0.884	1.41215e-06
Sec61b	1.39714e-10	0.160439	0.996	0.989	1.63424e-06
Dek	1.47601e-10	-0.168446	0.997	0.998	1.72649e-06
Hist1h1d	2.29029e-10	-0.283672	0.941	0.97	2.67895e-06
Cycs	2.43233e-10	0.240644	0.982	0.962	2.8451e-06
Dbi	3.56893e-10	0.221914	0.944	0.925	4.17458e-06
Atp5g1	3.62945e-10	0.225919	0.946	0.912	4.24537e-06
Pomp	4.96571e-10	0.165403	0.985	0.979	5.80839e-06
Ndufa4	5.58025e-10	0.178159	0.987	0.994	6.52722e-06
Psmb6	5.62258e-10	0.190241	0.966	0.955	6.57673e-06
Ppp1r14b	7.04597e-10	0.253438	0.821	0.743	8.24167e-06
Btg1	7.09907e-10	-0.375562	0.98	0.99	8.30378e-06
Rpl18	7.46886e-10	0.102922	1	1	8.73632e-06
Ranbp1	7.54762e-10	0.226007	0.984	0.968	8.82845e-06
Gps1	8.408e-10	0.196728	0.666	0.563	9.83484e-06
Edf1	8.41256e-10	0.164941	0.996	0.981	9.84017e-06
Rpl13a	8.63074e-10	-0.150724	0.987	0.992	1.00954e-05
Hist1h2be	8.67345e-10	-0.240381	0.756	0.853	1.01453e-05
Manf	9.63148e-10	0.180259	0.974	0.971	1.12659e-05
B2m	9.73136e-10	-0.124196	1	1	1.13828e-05
Mdh2	1.21395e-09	0.161553	0.978	0.979	1.41996e-05
Btf3	1.37241e-09	0.136739	0.997	0.998	1.60531e-05
Ostc	1.41445e-09	0.158681	0.956	0.96	1.65449e-05
Psma2	1.42338e-09	0.172115	0.987	0.981	1.66493e-05
Xist	1.47123e-09	-0.22118	1	1	1.72089e-05
Srsf7	1.94447e-09	0.218395	0.956	0.927	2.27444e-05
Mrps24	2.03423e-09	0.172003	0.947	0.943	2.37944e-05
Bcl2	2.22226e-09	-0.271594	0.795	0.876	2.59937e-05
Top2a	2.25117e-09	-0.213679	0.997	1	2.63319e-05
Ssr2	2.29157e-09	0.208955	0.936	0.9	2.68045e-05
Rpl13	2.35418e-09	0.101484	1	1	2.75368e-05
Ndufab1	2.42733e-09	0.196962	0.938	0.938	2.83925e-05
Rps27l	2.46013e-09	0.187815	0.985	0.957	2.87761e-05
Rbx1	2.63537e-09	0.152251	0.993	0.995	3.08259e-05
Ndufa8	2.74444e-09	0.1742	0.922	0.92	3.21017e-05
Hist1h4h	2.77675e-09	-0.26971	0.62	0.727	3.24796e-05
Trbc2	2.82479e-09	0.246835	0.999	1	3.30416e-05
Pabpc1	2.90881e-09	-0.14572	0.994	0.997	3.40244e-05
Ppp1ca	3.86557e-09	0.1372	0.999	0.998	4.52156e-05
Slc25a5	4.25367e-09	0.173905	0.992	0.995	4.97551e-05
Rpl15	4.33722e-09	0.106756	1	1	5.07325e-05
Lgals1	4.48611e-09	0.176081	1	1	5.24741e-05
Tmem14c	4.64575e-09	0.177105	0.945	0.931	5.43413e-05
Phb2	6.59421e-09	0.199778	0.943	0.92	7.71325e-05
Calm1	7.0201e-09	0.143647	1	1	8.21141e-05
Rpl35a	7.11047e-09	-0.0882964	1	1	8.31712e-05
Nop53	7.2367e-09	-0.201552	0.819	0.887	8.46477e-05
Nans	7.99883e-09	0.177031	0.844	0.772	9.35623e-05
Sumo2	8.88484e-09	0.143821	0.996	0.998	0.000103926
Ppa1	1.1282e-08	0.211084	0.745	0.67	0.000131965
Atp5g3	1.20792e-08	0.164932	0.97	0.982	0.000141291
Upk1a	1.25862e-08	0.111101	0.149	0.057	0.000147221
Rpl11	1.48019e-08	0.0928652	1	1	0.000173138
Prdx1	1.595e-08	0.17955	0.996	0.968	0.000186567
Prf1	1.73746e-08	0.314466	0.964	0.931	0.000203231
Snrpd2	1.76376e-08	0.141293	0.994	0.992	0.000206308
Bcl2l11	1.9794e-08	-0.187705	0.416	0.563	0.000231531
Ftl1	2.06448e-08	0.202235	0.995	0.997	0.000241482
Ifng	2.11188e-08	0.563703	0.925	0.904	0.000247027
Park7	2.12832e-08	0.188408	0.98	0.97	0.00024895
Ndufs8	2.17791e-08	0.163001	0.878	0.813	0.00025475
Timm13	2.285e-08	0.181454	0.938	0.915	0.000267277
Hist1h3e	2.39636e-08	-0.23604	0.946	0.947	0.000280303
Gnas	2.89164e-08	-0.119025	0.998	0.997	0.000338235
Rpl23a	2.98275e-08	-0.136584	1	0.998	0.000348893
Malat1	3.40862e-08	-0.304368	1	1	0.000398706
Cfl1	3.83501e-08	0.133922	1	0.998	0.000448581
Ahnak	3.91767e-08	-0.251863	0.73	0.826	0.00045825
Vps37b	3.9632e-08	-0.219826	0.811	0.877	0.000463575
Sesn3	3.97668e-08	-0.11876	0.251	0.388	0.000465153
Rex1bd	4.03798e-08	0.155404	0.908	0.888	0.000472323
Mrps14	4.32836e-08	0.157369	0.953	0.955	0.000506289
Hsp90ab1	4.69191e-08	0.138841	1	0.998	0.000548813
Klhl24	4.92062e-08	-0.121463	0.224	0.349	0.000575565
Ndufs6	4.98755e-08	0.171955	0.963	0.946	0.000583394
Nhp2	5.2124e-08	0.20869	0.88	0.839	0.000609694
Hist1h2ak	5.87789e-08	-0.159135	0.506	0.648	0.000687537
Rad21	6.16197e-08	-0.189908	0.845	0.919	0.000720766
Fyb	6.18551e-08	-0.187605	0.95	0.976	0.00072352
Eif4a1	6.43229e-08	0.166171	0.994	0.998	0.000752386
Trac	6.53867e-08	-0.1817	0.995	0.995	0.000764829
Arpc1a	6.62462e-08	0.160373	0.612	0.509	0.000774882
Psme2	6.70562e-08	0.157087	0.994	0.987	0.000784356
Hist2h2ac	6.75176e-08	-0.268365	0.851	0.911	0.000789754
Tsix	6.86925e-08	-0.201729	0.358	0.485	0.000803496
Gm6169	7.323e-08	-0.135518	0.367	0.51	0.000856571
Cisd1	7.37616e-08	0.198211	0.848	0.781	0.00086279
Krtcap2	9.92494e-08	0.138925	0.996	0.989	0.00116092
Hif1a	9.9542e-08	-0.217945	0.855	0.912	0.00116434
Hmgb1	1.06805e-07	-0.114598	1	1	0.0012493
Emg1	1.10126e-07	0.155936	0.967	0.957	0.00128814
Atp5h	1.10206e-07	0.120241	1	0.997	0.00128908
Psma7	1.15484e-07	0.154846	0.992	0.982	0.00135081
S100a10	1.36617e-07	-0.164405	0.997	0.995	0.00159801
Ssr4	1.38964e-07	0.145704	0.973	0.979	0.00162546
1700097N02Rik	1.41054e-07	-0.181517	0.558	0.675	0.00164991
Btg2	1.43065e-07	-0.264342	0.75	0.837	0.00167343
Mfsd4a	1.53156e-07	-0.0670676	0.068	0.152	0.00179147
Snrpd1	1.54157e-07	0.154035	0.991	0.982	0.00180318
Eif3i	1.62588e-07	0.159402	0.976	0.959	0.0019018
Hspe1	1.87132e-07	0.165562	0.985	0.976	0.00218888
Mrto4	2.03945e-07	0.188431	0.67	0.566	0.00238554
Hmgb2	2.08498e-07	-0.151238	1	1	0.0024388
Nudcd2	2.326e-07	0.170837	0.759	0.699	0.00272072
Smdt1	2.40753e-07	0.150549	0.974	0.963	0.00281609
Ndufb7	2.55608e-07	0.126943	0.994	0.994	0.00298985
Hist1h1c	2.68584e-07	-0.227857	0.937	0.97	0.00314162
Psmb8	2.84275e-07	0.101189	1	1	0.00332517
Arpc1b	2.88319e-07	0.123094	0.999	0.997	0.00337247
Rps27a	2.88579e-07	0.082284	1	1	0.00337551
Crim1	2.90075e-07	-0.085734	0.072	0.152	0.00339301
Capg	2.99529e-07	0.224053	0.906	0.866	0.00350359
Ablim1	3.35328e-07	-0.161167	0.682	0.805	0.00392233
Mbnl1	3.46106e-07	-0.174369	0.991	0.997	0.00404841
Ier5l	3.79452e-07	-0.199633	0.301	0.418	0.00443845
U2af1	3.82305e-07	0.153677	0.954	0.947	0.00447182
Mrps16	3.84384e-07	0.148248	0.972	0.941	0.00449614
Cdkn2c	4.3875e-07	-0.173308	0.554	0.689	0.00513206
Lyar	4.55054e-07	0.176251	0.856	0.797	0.00532276
Ndufb10	4.74043e-07	0.159396	0.941	0.92	0.00554488
Lamtor2	4.8537e-07	0.154309	0.937	0.919	0.00567737
Fabp5	4.88303e-07	0.203911	0.802	0.746	0.00571169
Fkbp1a	4.97854e-07	0.153163	0.973	0.962	0.0058234
Ndufc2	5.06649e-07	0.139466	0.964	0.965	0.00592627
Swi5	5.14275e-07	0.14396	0.962	0.952	0.00601547
Hist2h2aa1	5.19342e-07	-0.126395	0.386	0.523	0.00607474
Itgb1	5.43534e-07	-0.23666	0.773	0.864	0.00635771
Hint1	5.7053e-07	0.107883	0.999	0.998	0.00667349
Atp5c1	5.71699e-07	0.122929	0.996	0.987	0.00668717
Psma5	6.61037e-07	0.150392	0.946	0.947	0.00773215
Tmsb4x	6.74604e-07	0.127857	1	1	0.00789084
Tomm40	7.32807e-07	0.17463	0.659	0.577	0.00857165
Rb1	8.02774e-07	-0.10251	0.303	0.432	0.00939005
Ybx1	8.3078e-07	0.127983	0.999	0.998	0.00971763
mt-Co3	8.39719e-07	-0.125012	1	1	0.00982219
Ncapg2	9.45521e-07	-0.162666	0.728	0.778	0.0110598
Etfb	9.67914e-07	0.177175	0.942	0.922	0.0113217
Rps3a1	9.70548e-07	0.077614	1	1	0.0113525
Hist1h1e	9.73344e-07	-0.188858	0.999	1	0.0113852
Crip1	9.80642e-07	-0.207505	0.992	0.992	0.0114706
Arpc3	1.01389e-06	0.123796	0.996	0.99	0.0118594
Fth1	1.02707e-06	0.116811	0.999	1	0.0120137
Bcl2a1b	1.04265e-06	0.180109	0.969	0.963	0.0121959
Ccl3	1.05762e-06	0.782617	0.683	0.577	0.012371
Gpatch8	1.07835e-06	-0.126684	0.589	0.708	0.0126134
Nufip2	1.09093e-06	-0.128108	0.51	0.627	0.0127606
Cep162	1.19628e-06	-0.0982107	0.203	0.314	0.0139929
Ptprcap	1.21735e-06	0.121745	1	1	0.0142393
Sem1	1.22082e-06	0.110196	0.995	0.994	0.01428
Atp6v0e	1.32892e-06	0.144792	0.963	0.965	0.0155444
Zc3hav1	1.35142e-06	-0.165474	0.656	0.75	0.0158076
Ifngr1	1.38409e-06	-0.232977	0.772	0.847	0.0161897
Cbx3	1.38874e-06	-0.129332	0.992	0.994	0.0162441
2410015M20Rik	1.3977e-06	0.137412	0.94	0.939	0.0163489
Tomm5	1.52362e-06	0.16215	0.871	0.836	0.0178218
Zfp36l2	1.60417e-06	-0.202294	0.729	0.834	0.018764
Hist1h3f	1.63748e-06	-0.186443	0.765	0.845	0.0191536
Hist1h3i	1.71679e-06	-0.197492	0.732	0.813	0.0200813
Atp5d	1.79313e-06	0.114259	0.996	0.994	0.0209742
Rexo2	1.90813e-06	0.148879	0.844	0.789	0.0223193
Bcl2a1d	1.96055e-06	0.175661	0.932	0.919	0.0229326
H2-Q4	1.96735e-06	-0.173626	0.974	0.986	0.023012
Srp14	2.01164e-06	0.120478	0.97	0.976	0.0235302
Ptbp3	2.07804e-06	-0.177391	0.94	0.962	0.0243068
Slc38a2	2.10443e-06	-0.189434	0.902	0.957	0.0246155
Aurkaip1	2.28217e-06	0.139974	0.953	0.96	0.0266946
Pop5	2.30038e-06	0.142989	0.891	0.833	0.0269075
Lsm4	2.31059e-06	0.141917	0.969	0.952	0.027027
Spcs2	2.38565e-06	0.121379	0.982	0.984	0.0279049
Ly6e	2.43892e-06	-0.209109	0.981	0.965	0.0285281
Mrps33	2.44967e-06	0.14005	0.922	0.893	0.0286538
Lsm6	2.69897e-06	0.136572	0.946	0.925	0.0315698
Mrpl20	2.70959e-06	0.145017	0.917	0.887	0.031694
Prdx2	2.72379e-06	0.156537	0.893	0.858	0.0318601
Gimap6	2.81842e-06	-0.209088	0.836	0.9	0.032967
Txnl1	2.85374e-06	0.14715	0.947	0.928	0.0333802
Gpr183	2.99228e-06	-0.192905	0.365	0.466	0.0350007
Neurl3	3.05584e-06	-0.0864693	0.218	0.329	0.0357441
Tkt	3.09243e-06	0.162696	0.953	0.944	0.0361721
Tmem163	3.32262e-06	0.128313	0.617	0.531	0.0388647
Eno3	3.38221e-06	0.209462	0.732	0.656	0.0395617
Ldha	3.39708e-06	0.176133	0.997	0.99	0.0397356
Rpl36a	3.57737e-06	-0.0911852	1	1	0.0418445
Card11	3.63447e-06	-0.0817295	0.209	0.309	0.0425124
Ndufs7	3.65282e-06	0.138556	0.904	0.877	0.042727
Ing5	3.6557e-06	-0.0828308	0.298	0.427	0.0427607
Arhgap9	3.71413e-06	-0.137495	0.76	0.858	0.0434442
Glrx2	3.98323e-06	0.133601	0.719	0.651	0.0465919
1110008F13Rik	4.05962e-06	0.143037	0.898	0.895	0.0474854
Stim1	4.07989e-06	-0.126985	0.427	0.534	0.0477225
Wdr89	4.22278e-06	-0.159267	0.989	0.989	0.0493938
Atp5a1	4.60876e-06	0.135508	0.98	0.986	0.0539087
Gbp9	4.63614e-06	-0.140784	0.369	0.475	0.054229
Uqcrb	4.6772e-06	0.151439	0.962	0.955	0.0547092
Dph3	4.93568e-06	0.131308	0.854	0.809	0.0577326
Ddit4	5.13031e-06	-0.103896	0.283	0.404	0.0600092
Dctpp1	5.20344e-06	0.164742	0.899	0.855	0.0608647
Cdk19	5.44352e-06	-0.101156	0.271	0.384	0.0636729
Coro1a	5.48097e-06	0.102137	1	1	0.0641109
Zcchc11	5.6253e-06	-0.165178	0.629	0.719	0.0657991
Atp5o.1	5.83409e-06	0.113683	0.984	0.987	0.0682414
Glrx3	6.11449e-06	0.132192	0.889	0.858	0.0715212
C1qbp	6.31441e-06	0.155315	0.834	0.775	0.0738596
Rgs10	6.5178e-06	-0.0986985	0.119	0.204	0.0762387
Lamtor4	6.62593e-06	0.150686	0.942	0.927	0.0775035
Cd6	6.74628e-06	-0.114011	0.387	0.51	0.0789112
Samd3	6.79368e-06	-0.0690806	0.091	0.167	0.0794656
Fbl	6.8706e-06	0.161324	0.825	0.762	0.0803654
Dnah8	6.91407e-06	-0.184182	0.437	0.539	0.0808739
Lsm7	7.12397e-06	0.132243	0.728	0.644	0.0833291
Actg1	7.45227e-06	0.131324	1	1	0.0871691
B230219D22Rik	7.83042e-06	-0.139938	0.627	0.724	0.0915925
Hist1h2bn	8.02033e-06	-0.172643	0.483	0.577	0.0938137
Vps29	8.36898e-06	0.132054	0.913	0.893	0.0978919
Uqcr11	8.49874e-06	0.132411	0.942	0.943	0.0994098
Naa10	8.6695e-06	0.13539	0.829	0.786	0.101407
Vgll4	8.96802e-06	-0.135396	0.601	0.713	0.104899
Atp5f1	9.0825e-06	0.107201	0.998	0.995	0.106238
Ddx39	9.11103e-06	0.139958	0.917	0.915	0.106572
Ptprc	1.02856e-05	-0.154121	0.993	0.995	0.120311
Psmd8	1.0818e-05	0.146521	0.939	0.93	0.126539
mt-Co1	1.08676e-05	-0.129799	1	1	0.127119
Men1	1.11002e-05	-0.0649324	0.12	0.203	0.129839
Polr2m	1.12653e-05	-0.126793	0.738	0.812	0.131771
Rpl6	1.14303e-05	-0.0773166	1	1	0.133701
Ccne2	1.17163e-05	-0.0885286	0.173	0.263	0.137046
Ech1	1.19701e-05	0.123891	0.949	0.939	0.140014
Timm17a	1.22085e-05	0.134717	0.793	0.737	0.142802
Cct8	1.2457e-05	0.127965	0.935	0.927	0.14571
Adgre5	1.26162e-05	-0.0982934	0.486	0.603	0.147572
Gpx1	1.2622e-05	0.144697	0.717	0.659	0.14764
Ndufa11	1.27002e-05	0.110621	0.967	0.96	0.148554
Rsl1d1	1.28542e-05	0.152298	0.884	0.864	0.150356
AY036118	1.29475e-05	-0.113906	0.908	0.93	0.151447
Capzb	1.30857e-05	0.104878	0.989	0.99	0.153064
Rps15	1.30892e-05	-0.112736	1	1	0.153105
Vezf1	1.31832e-05	-0.1026	0.375	0.494	0.154204
Ubl4a	1.34262e-05	0.133867	0.78	0.715	0.157046
Epdr1	1.35282e-05	0.128542	0.439	0.344	0.158239
Epb41	1.4124e-05	-0.107899	0.306	0.404	0.165209
Gm42047	1.45859e-05	-0.142492	0.614	0.71	0.170612
Cd3e	1.51542e-05	-0.124157	0.997	1	0.177259
Rps4x	1.6982e-05	0.080653	0.999	1	0.198638
Sf3b5	1.77453e-05	0.110169	0.977	0.974	0.207567
S100a4	1.78065e-05	0.183905	0.995	0.987	0.208282
Tma7	1.82145e-05	0.0909821	0.998	1	0.213055
Pdia6	1.92167e-05	0.133798	0.94	0.919	0.224778
Nedd8	1.9314e-05	0.119127	0.982	0.979	0.225916
Tsc22d4	1.98825e-05	-0.137633	0.921	0.949	0.232566
BC031181	1.99009e-05	0.121786	0.829	0.801	0.232781
Ifi214	1.99215e-05	-0.190005	0.316	0.416	0.233022
Phf19	1.99725e-05	-0.0434931	0.058	0.12	0.233618
Rps26	2.03244e-05	-0.101072	0.999	0.998	0.237734
Itpkb	2.04888e-05	-0.152154	0.458	0.569	0.239657
Nkg7	2.05363e-05	0.112701	1	1	0.240213
Pik3r1	2.06849e-05	-0.167256	0.509	0.612	0.241951
Sdhb	2.09923e-05	0.146687	0.934	0.928	0.245547
Cct7	2.14023e-05	0.126849	0.957	0.963	0.250343
Cops4	2.14158e-05	0.126923	0.816	0.788	0.250501
Neat1	2.20339e-05	-0.268506	0.582	0.678	0.25773
Tpm3	2.23144e-05	-0.0958676	0.993	0.994	0.261012
Dus1l	2.32775e-05	0.098231	0.464	0.365	0.272277
Hist1h1b	2.33133e-05	-0.187636	0.998	0.997	0.272696
Trim59	2.45522e-05	-0.17144	0.61	0.719	0.287187
Eef1e1	2.46219e-05	0.133295	0.59	0.526	0.288002
Ift80	2.51949e-05	-0.075742	0.189	0.287	0.294705
Ubc	2.52538e-05	-0.180816	0.722	0.793	0.295393
Mylip	2.594e-05	-0.0636197	0.074	0.137	0.30342
Mrps26	2.61075e-05	0.127534	0.926	0.928	0.30538
Tnrc6b	2.65627e-05	-0.141698	0.545	0.643	0.310704
Hells	2.67041e-05	-0.165577	0.829	0.893	0.312358
Fnbp1	2.78653e-05	-0.125437	0.737	0.813	0.325941
Tmsb10	2.80073e-05	-0.11684	1	1	0.327601
Pgls	2.85041e-05	0.13003	0.963	0.943	0.333413
Ndufb9	2.87982e-05	0.106836	0.988	0.978	0.336852
Ifnar2	2.88247e-05	-0.137937	0.353	0.453	0.337163
Actr10	2.905e-05	0.138776	0.878	0.872	0.339798
Sod1	2.92244e-05	-0.139114	0.764	0.831	0.341837
Cuta	2.93175e-05	0.127497	0.878	0.845	0.342927
Gzmc	2.95059e-05	0.371459	0.155	0.085	0.345131
Timm8b	2.99026e-05	0.122403	0.818	0.767	0.349771
Ckap2	3.0562e-05	-0.129709	0.451	0.577	0.357483
Rpn1	3.07173e-05	0.137763	0.736	0.663	0.3593
Pebp1	3.19327e-05	0.136716	0.95	0.947	0.373516
Ppp1r11	3.37814e-05	0.125097	0.87	0.823	0.395141
Snu13	3.38452e-05	0.129176	0.968	0.962	0.395887
Hist1h2bg	3.39719e-05	-0.108782	0.508	0.625	0.39737
Upf2	3.45003e-05	-0.0977358	0.393	0.502	0.40355
Lnpep	3.50642e-05	-0.130275	0.704	0.804	0.410146
Sp140	3.5498e-05	-0.15642	0.546	0.614	0.41522
Cnot6l	3.67251e-05	-0.13057	0.753	0.828	0.429573
Hist1h4c	3.79884e-05	-0.131219	0.413	0.525	0.44435
Fam168a	3.83566e-05	-0.118486	0.228	0.313	0.448657
Exosc3	3.8745e-05	0.140249	0.765	0.738	0.4532
Irf8	4.06299e-05	0.137487	0.953	0.928	0.475248
Fam13b	4.14196e-05	-0.0977808	0.19	0.276	0.484485
Hjurp	4.22336e-05	-0.158192	0.802	0.874	0.494006
St8sia4	4.2711e-05	-0.105744	0.298	0.402	0.499591
Zbtb26	4.29177e-05	-0.0493327	0.064	0.124	0.502008
Rps10	4.35439e-05	0.0642874	1	1	0.509332
Psmc4	4.35666e-05	0.111368	0.867	0.844	0.509598
Ndufb6	4.50244e-05	0.139868	0.872	0.85	0.526651
Cdk5rap2	4.58136e-05	-0.123248	0.302	0.396	0.535882
Uqcrq	4.62402e-05	0.113915	0.991	0.987	0.540872
Zfp260	4.77765e-05	-0.0838174	0.194	0.284	0.558842
Esd	4.80918e-05	0.11381	0.945	0.951	0.56253
Slc25a3	4.81997e-05	0.102764	0.998	0.994	0.563792
Aes	4.82699e-05	0.0977818	0.999	0.994	0.564613
Rps11	4.8953e-05	0.0678063	1	1	0.572603
Sp110	4.92206e-05	-0.165417	0.759	0.833	0.575733
Fchsd2	4.95372e-05	-0.0555938	0.136	0.215	0.579437
Snrpa1	5.0202e-05	0.133917	0.886	0.863	0.587213
Ccl4	5.08231e-05	0.663158	0.842	0.794	0.594477
Mrpl23	5.10431e-05	0.135014	0.896	0.868	0.597051
Mrpl18	5.11479e-05	0.116434	0.967	0.959	0.598277
Miip	5.19337e-05	-0.0858874	0.321	0.419	0.607469
Pcna	5.30942e-05	-0.14236	0.907	0.92	0.621042
Usp11	5.31917e-05	-0.0505314	0.092	0.159	0.622183
Grwd1	5.3592e-05	0.0774717	0.223	0.145	0.626865
Hp1bp3	5.43139e-05	-0.137657	0.803	0.872	0.635309
Spp1	5.54532e-05	0.248598	0.922	0.893	0.648636
Tob2	5.55028e-05	-0.130391	0.354	0.456	0.649216
Taf1d	5.5771e-05	-0.143913	0.852	0.906	0.652354
Bola3	5.71999e-05	0.132283	0.869	0.848	0.669067
Alad	5.74649e-05	0.174519	0.743	0.726	0.672167
Timm8a1	5.77484e-05	0.158248	0.611	0.557	0.675483
Hspa1b	5.96014e-05	-0.412756	0.368	0.442	0.697158
Tspyl2	6.15867e-05	-0.0399654	0.057	0.113	0.72038
Psma4	6.16211e-05	0.120212	0.973	0.965	0.720783
Ssbp4	6.50059e-05	0.126431	0.858	0.837	0.760374
Plekhn1	6.54051e-05	-0.0523816	0.078	0.14	0.765044
Snrpg	6.58361e-05	-0.0968849	1	0.998	0.770085
Ppib	6.70234e-05	0.0929338	0.996	0.997	0.783973
Hist1h4b	6.70518e-05	-0.0583434	0.128	0.204	0.784305
Nop16	6.75499e-05	0.111947	0.368	0.281	0.790131
Sec11c	6.80519e-05	0.10694	0.991	0.987	0.796003
Lats1	6.80989e-05	-0.0604403	0.126	0.201	0.796553
Txn1	6.90803e-05	0.0900681	0.998	0.997	0.808033
Fam78a	6.94828e-05	-0.0887302	0.241	0.33	0.81274
Ssbp2	7.00366e-05	-0.0582264	0.072	0.131	0.819218
Tecr	7.06559e-05	0.128991	0.907	0.869	0.826462
Hist2h4	7.10276e-05	-0.0844977	0.175	0.257	0.83081
Pfdn2	7.11536e-05	0.108564	0.862	0.831	0.832284
Eif2s1	7.16665e-05	0.134734	0.898	0.892	0.838283
Fdps	7.3466e-05	0.117906	0.443	0.351	0.859332
Washc3	7.39423e-05	0.113578	0.675	0.624	0.864904
Morf4l1	7.45584e-05	-0.108618	0.976	0.978	0.87211
Kif23	7.45655e-05	-0.152634	0.678	0.762	0.872193
Dnajc15	7.4874e-05	0.12539	0.685	0.624	0.875801
Msl1	7.52797e-05	-0.0718607	0.322	0.424	0.880547
Stag2	7.53286e-05	-0.105746	0.718	0.788	0.881118
Sdf2l1	7.64413e-05	0.153462	0.842	0.842	0.894134
Ndufb4	7.769e-05	0.110473	0.872	0.86	0.90874
Phf6	7.81689e-05	-0.10105	0.524	0.62	0.914341
Sap18	7.97861e-05	0.122038	0.862	0.817	0.933258
Atp2a3	8.04251e-05	-0.0693464	0.194	0.285	0.940732
Eef1a1	8.0767e-05	-0.0578455	1	1	0.944731
Txn2	8.11539e-05	0.136257	0.857	0.833	0.949257
Tubb5	8.18595e-05	-0.125269	1	1	0.95751
Chd4	8.23519e-05	-0.131026	0.819	0.882	0.963271
Nsa2	8.24385e-05	-0.119123	0.986	0.987	0.964283
Hist4h4	8.28641e-05	-0.121506	0.4	0.496	0.969262
Mrpl21	8.35128e-05	0.130723	0.796	0.769	0.976849
Bag1	8.77725e-05	0.123469	0.953	0.955	1
Pin1	8.88121e-05	0.128217	0.824	0.804	1
Stat5b	8.91086e-05	-0.0679566	0.28	0.388	1
Klhl6	9.18155e-05	-0.0884888	0.227	0.319	1
Ifi209	9.58033e-05	-0.214027	0.389	0.486	1
Atp5j2	9.77136e-05	0.0972103	0.997	0.994	1
Zcrb1	9.78173e-05	0.114172	0.917	0.922	1
Diaph3	9.78716e-05	-0.141665	0.595	0.687	1
Cdkn1a	9.80228e-05	-0.068445	0.142	0.223	1
Zfp664	9.80378e-05	-0.0808079	0.288	0.383	1
Ndufb5	9.91197e-05	0.0959576	0.975	0.968	1
Srm	9.98079e-05	0.122569	0.376	0.29	1
Npm1	9.99724e-05	0.121413	1	0.997	1
Gm3448	0.000101035	-0.0857796	0.175	0.255	1
Izumo1r	0.000101988	-0.0857135	0.13	0.204	1
Arl14ep	0.000103243	-0.122668	0.537	0.644	1
Vps13c	0.000103817	-0.080638	0.292	0.391	1
Mxd4	0.00010452	-0.0906775	0.267	0.364	1
Fau	0.00010542	-0.070945	1	1	1
Hist1h2ac	0.000107622	-0.113042	0.264	0.357	1
Pdpk1	0.000110059	-0.1002	0.429	0.526	1
Elf1	0.000110697	-0.121475	0.88	0.925	1
Hist1h2br	0.000112258	-0.0906964	0.226	0.308	1
Ssu72	0.000112441	0.1106	0.916	0.901	1
Guk1	0.000113947	0.116443	0.606	0.557	1
Rnaseh2c	0.000120517	0.11731	0.964	0.96	1
Psma1	0.000122952	0.115186	0.957	0.954	1
Wdr18	0.000123383	0.107755	0.515	0.434	1
Abca3	0.000123758	-0.0379547	0.052	0.104	1
Tomm20	0.000127044	0.109361	0.975	0.97	1
Dgkd	0.000128078	-0.0772409	0.403	0.51	1
Nrgn	0.000132267	0.187473	0.962	0.943	1
Ciapin1	0.000133067	0.120504	0.901	0.882	1
Trp53inp1	0.000133393	-0.0490488	0.055	0.108	1
Gna13	0.000133574	-0.105647	0.504	0.604	1
Lat	0.000134481	0.126476	0.93	0.919	1
Eif4e2	0.000135788	0.101993	0.899	0.884	1
Psmd7	0.000136396	0.128669	0.867	0.848	1
Lsm1	0.000136969	0.111752	0.721	0.667	1
Ctdsp2	0.000139129	-0.0415395	0.122	0.198	1
Tuba1b	0.000140966	-0.101002	1	1	1
Srsf3	0.00014239	0.102666	0.998	0.995	1
Txnl4a	0.000142987	0.131135	0.813	0.802	1
Usp42	0.000143479	-0.0516918	0.101	0.166	1
Cyc1	0.000144015	0.130455	0.887	0.839	1
Rpl9	0.000146979	0.0619662	1	1	1
Pum2	0.000148796	-0.111854	0.639	0.764	1
Wdtc1	0.000150411	-0.0756114	0.282	0.373	1
Racgap1	0.000151474	-0.123918	0.815	0.872	1
H2afj	0.000152625	0.116082	0.95	0.957	1
Hist1h2bj	0.000157218	-0.128474	0.766	0.842	1
Spcs1	0.000157254	0.112607	0.936	0.919	1
Rpl22l1	0.000158184	0.0980445	0.999	0.994	1
Mdh1	0.000160844	0.117756	0.963	0.967	1
Laptm5	0.00016218	-0.0901852	0.994	0.997	1
Kctd12	0.000165216	-0.040816	0.075	0.132	1
Sptan1	0.000167341	-0.128263	0.554	0.636	1
Ccsap	0.000168184	-0.103043	0.425	0.518	1
Ehd3	0.000170566	-0.0522015	0.114	0.183	1
Samsn1	0.00017274	-0.1517	0.942	0.944	1
Sac3d1	0.000174655	0.077628	0.303	0.22	1
Dnm1l	0.000174891	-0.0912181	0.41	0.518	1
Son	0.000178684	-0.14145	0.973	0.997	1
Timm50	0.000180398	0.10741	0.677	0.628	1
Hras	0.000183106	0.114864	0.783	0.732	1
Sorl1	0.000183981	-0.0958467	0.375	0.469	1
Cdc6	0.000184466	-0.0873019	0.282	0.381	1
A430046D13Rik	0.000184831	-0.0660188	0.19	0.271	1
Sco2	0.000186045	0.0785009	0.213	0.144	1
Bnip3l	0.000188493	-0.124499	0.715	0.778	1
Glo1	0.000189094	0.110452	0.849	0.828	1
Ndufs5	0.000190284	0.103175	0.955	0.962	1
Nabp1	0.000191081	-0.157309	0.774	0.839	1
E2f2	0.000193459	-0.0719398	0.293	0.396	1
Nrm	0.000198232	-0.114706	0.774	0.831	1
Apex1	0.000198473	0.130673	0.437	0.368	1
Ccni	0.000198631	-0.124348	0.792	0.837	1
Znhit3	0.000200623	0.109616	0.529	0.478	1
Ndufs2	0.000201355	0.118834	0.877	0.871	1
Dut	0.000203038	0.133535	0.997	0.992	1
Hist1h2bm	0.000205068	-0.0985102	0.633	0.743	1
Gtf2h5	0.00020556	0.102761	0.924	0.914	1
Ipp	0.000206266	-0.0775432	0.215	0.295	1
Rae1	0.000206328	0.102332	0.648	0.595	1
Fkbp8	0.000207238	0.126391	0.939	0.933	1
Esco2	0.000208499	-0.123721	0.835	0.874	1
Hspd1	0.000208563	0.17637	0.928	0.915	1
Rhoq	0.000209074	-0.0571354	0.128	0.198	1
Ythdc1	0.000209701	-0.113598	0.749	0.802	1
H2-D1	0.000210004	-0.0862157	1	1	1
Gspt1	0.000213184	0.114489	0.876	0.852	1
Psma6	0.00021338	0.112762	0.914	0.9	1
Uqcc2	0.000214261	0.137657	0.863	0.831	1
Pde4d	0.000215702	-0.0895015	0.375	0.478	1
Hspa1a	0.000216197	-0.241718	0.253	0.34	1
Nr2c2	0.000218853	-0.104529	0.429	0.52	1
Cenpk	0.000219186	-0.105081	0.665	0.769	1
Snrpb	0.000222723	0.0987107	0.994	0.987	1
Birc2	0.00022458	-0.124948	0.727	0.801	1
Pkn1	0.000225757	-0.11244	0.525	0.612	1
Phf3	0.000225828	-0.105352	0.679	0.754	1
Nucks1	0.000226315	-0.124995	0.985	0.997	1
Ube2h	0.000226734	-0.0987118	0.397	0.496	1
Aplp2	0.000228121	-0.116272	0.498	0.582	1
Erh	0.000228419	0.152468	0.866	0.836	1
Prmt1	0.000229928	0.127578	0.894	0.866	1
H2-T23	0.000235218	-0.148632	0.983	0.984	1
Tacc1	0.000236067	-0.135071	0.809	0.86	1
Tcf19	0.000236624	-0.115973	0.54	0.619	1
Cope	0.000236874	0.124069	0.893	0.844	1
Cdca5	0.000238912	-0.108209	0.622	0.695	1
Zcchc7	0.000238913	-0.0911365	0.652	0.748	1
Reep5	0.000243424	0.117609	0.982	0.978	1
Mki67	0.000243654	-0.205473	0.964	0.976	1
Cenpp	0.000243743	-0.105402	0.54	0.632	1
Fem1c	0.00024478	-0.0710005	0.29	0.386	1
Ensa	0.000245488	-0.0955456	0.585	0.679	1
Dkc1	0.000250615	0.113634	0.659	0.595	1
Nr3c1	0.00025205	-0.126277	0.483	0.558	1
Psip1	0.000253348	-0.118212	0.904	0.941	1
Senp7	0.000256547	-0.10384	0.361	0.451	1
Ebp	0.000259004	0.113458	0.882	0.866	1
Serinc3	0.000263534	-0.109894	0.935	0.96	1
Sec11a	0.00026434	0.10672	0.937	0.928	1
Pcbp2	0.000265066	-0.0943315	0.986	0.987	1
Trappc2l	0.0002679	0.112899	0.75	0.705	1
Gm44175	0.000269286	-0.0599431	0.128	0.196	1
Uqcrc2	0.000269419	0.110714	0.863	0.863	1
Mrpl12	0.000272835	0.122131	0.87	0.855	1
Serf2	0.000275642	0.0763292	1	1	1
Havcr2	0.00027652	0.144306	0.729	0.648	1
Twistnb	0.000277812	0.0886513	0.645	0.56	1
Mepce	0.000278667	-0.0731548	0.289	0.38	1
Cir1	0.000283152	-0.104815	0.44	0.541	1
Hipk1	0.000283781	-0.118801	0.442	0.534	1
Emc6	0.000288199	0.103831	0.804	0.769	1
Psmb4	0.000292257	0.111809	0.979	0.959	1
Erg28	0.000292378	0.114025	0.784	0.753	1
Wdr90	0.000297329	-0.0513103	0.109	0.172	1
Ep400	0.00029845	-0.100009	0.513	0.617	1
Actr2	0.000299357	-0.114039	0.944	0.971	1
Rpl36	0.000300071	-0.0696941	1	1	1
Elovl5	0.000303641	-0.0592238	0.267	0.354	1
Tomm7	0.000303826	-0.087528	0.998	0.998	1
2022-09-06	0.000309789	-0.120939	0.808	0.853	1
Txnip	0.000311334	-0.110546	0.325	0.416	1
Socs1	0.000313455	-0.087274	0.504	0.611	1
Ptp4a2	0.000316054	-0.106758	0.944	0.96	1
Rangap1	0.000317165	-0.101829	0.793	0.877	1
Akt3	0.000318462	-0.0624788	0.102	0.164	1
Ndufa13	0.000318736	0.0924549	0.997	0.995	1
Gm26825	0.00031978	-0.248007	0.567	0.641	1
Nol12	0.000324552	0.100235	0.707	0.652	1
Ppp3cb	0.000326962	-0.115388	0.701	0.754	1
Eif3g	0.000329787	0.108568	0.828	0.807	1
Rgs8	0.000336832	0.0870788	0.24	0.172	1
Rlf	0.000342117	-0.120535	0.542	0.632	1
Hspbp1	0.000348909	0.0971169	0.545	0.464	1
Selenof	0.000351815	0.089927	0.964	0.947	1
Fam96b	0.000355458	0.0971942	0.861	0.853	1
Rer1	0.000356147	0.107662	0.955	0.957	1
Utrn	0.000359586	-0.108132	0.426	0.517	1
Eif6	0.000359931	0.108737	0.883	0.866	1
Vps4b	0.000362074	-0.110931	0.613	0.699	1
Enox2	0.000362467	-0.0533312	0.098	0.158	1
Mrpl27	0.000365303	0.112944	0.656	0.616	1
Dctn3	0.000365449	0.110577	0.9	0.893	1
Msh6	0.000373024	-0.0413393	0.192	0.271	1
Trir	0.000373296	0.116061	0.977	0.968	1
Gcsh	0.0003733	0.0850807	0.365	0.285	1
Lat2	0.000377498	0.128488	0.77	0.727	1
Gimap4	0.000378058	-0.137595	0.944	0.962	1
Anp32e	0.000380205	-0.114198	0.952	0.986	1
Tmed9	0.000387351	0.114081	0.955	0.946	1
1810037I17Rik	0.000388988	0.101306	0.993	0.995	1
Rps3	0.000391922	0.0548752	1	1	1
Rpl17	0.000394114	-0.0641758	0.999	1	1
Rab11a	0.000398195	0.103897	0.705	0.652	1
Ifnar1	0.000400557	-0.0906586	0.488	0.581	1
H2afv	0.000400918	-0.155601	0.985	0.981	1
Ccnt2	0.0004012	-0.0836481	0.313	0.404	1
Nubp2	0.000408697	0.0935106	0.497	0.429	1
Ahsa2	0.000408837	0.0913784	0.459	0.388	1
Csgalnact2	0.00041122	-0.0569021	0.1	0.158	1
Purb	0.000411701	-0.134527	0.907	0.947	1
Slf2	0.00041533	-0.0725965	0.261	0.351	1
Smc4	0.000417473	-0.116379	0.996	0.998	1
Neil3	0.000423724	-0.106779	0.543	0.619	1
Lbr	0.000427512	-0.134525	0.845	0.901	1
Trav3-3	0.000433395	-0.0592032	0.079	0.134	1
Hexb	0.000433554	-0.0602375	0.347	0.453	1
Parg	0.000433769	-0.0745145	0.314	0.405	1
Psmd6	0.000436537	0.117921	0.743	0.718	1
Bccip	0.000443495	0.101953	0.619	0.568	1
Iqsec1	0.000444467	-0.063752	0.355	0.455	1
Brf1	0.000446778	-0.0599553	0.171	0.246	1
Wdr76	0.000451124	-0.0883148	0.524	0.609	1
Tes	0.000451261	-0.126959	0.875	0.9	1
Sh2d2a	0.000452502	0.11189	0.95	0.939	1
Hnrnpab	0.000453239	0.115684	0.983	0.978	1
Eef2	0.000455286	-0.102354	1	1	1
Cdt1	0.00045628	-0.0751567	0.41	0.502	1
Iqgap1	0.000457866	-0.110717	0.941	0.949	1
Arl4c	0.000458247	-0.154899	0.459	0.533	1
Ppan	0.000459628	0.0859979	0.356	0.281	1
Tmem167	0.000462404	0.1036	0.976	0.959	1
Tecpr1	0.000462549	-0.0733001	0.231	0.311	1
Hexim1	0.000463531	-0.0650215	0.224	0.311	1
Hist1h3b	0.000468262	-0.0867	0.494	0.584	1
Alkbh4	0.000475374	-0.0442392	0.107	0.169	1
Acsl4	0.000477786	-0.0808966	0.507	0.609	1
Ccdc124	0.000477975	0.103418	0.848	0.805	1
Psmc5	0.00048266	0.118169	0.826	0.799	1
mt-Nd3	0.000498358	-0.123981	0.962	0.973	1
Uspl1	0.000502611	-0.0666183	0.184	0.254	1
Pten	0.000502817	-0.0997425	0.585	0.665	1
Foxm1	0.00050476	-0.0835716	0.411	0.506	1
Fkbp4	0.000506024	0.102456	0.796	0.762	1
Nsl1	0.000513927	-0.044406	0.191	0.27	1
Fam169b	0.000517046	-0.0946104	0.453	0.549	1
Pdcd6ip	0.000518731	-0.112457	0.762	0.825	1
Fh1	0.000521695	0.112197	0.75	0.703	1
Uck2	0.000522428	0.0906263	0.425	0.348	1
Rnf43	0.000528586	-0.0357985	0.063	0.113	1
2810474O19Rik	0.000544487	-0.117023	0.59	0.66	1
Commd7	0.000545519	0.104347	0.71	0.656	1
Gzmf	0.000559447	0.556675	0.2	0.132	1
Hectd4	0.000559582	-0.0586903	0.099	0.158	1
Mrpl42	0.000562721	0.110653	0.927	0.914	1
Rplp1	0.000564195	-0.0631416	1	1	1
Ikzf5	0.000564378	-0.0748721	0.248	0.324	1
Ebna1bp2	0.00056766	0.125095	0.752	0.732	1
Gm26722	0.000568137	-0.0373505	0.055	0.1	1
St3gal6	0.00056956	-0.0675813	0.234	0.316	1
Gm26917	0.000588323	0.189285	0.812	0.797	1
Mdfic	0.000591965	-0.137415	0.672	0.746	1
Hmgn2	0.000592616	-0.129618	0.967	0.973	1
D8Ertd738e	0.00059665	0.106055	0.982	0.971	1
Oas3	0.000597154	-0.0683725	0.075	0.128	1
Eloc	0.000598772	0.091522	0.977	0.981	1
Tmpo	0.000605079	-0.122489	0.989	0.989	1
H1fx	0.000610531	-0.0928712	0.122	0.185	1
Cox7b	0.000611398	0.0931706	0.986	0.978	1
Cd226	0.000611461	0.138349	0.663	0.59	1
Mrpl36	0.000613418	0.124391	0.756	0.732	1
Papd5	0.000619298	-0.072063	0.296	0.378	1
Ccdc82	0.000622462	-0.112209	0.563	0.632	1
Sssca1	0.000623102	0.117827	0.611	0.553	1
Gm28875	0.000627757	-0.0496982	0.13	0.196	1
Akr1b3	0.000628234	0.119702	0.869	0.869	1
Slc20a1	0.000634793	-0.110783	0.386	0.474	1
Mrpl15	0.000640203	0.122685	0.768	0.734	1
Atp2b1	0.000645178	-0.145149	0.748	0.823	1
Ndufa10	0.000649563	0.104806	0.835	0.833	1
Tmem160	0.000651842	0.106623	0.876	0.872	1
Phip	0.000653127	-0.114365	0.654	0.726	1
Aak1	0.000653992	-0.0821562	0.445	0.541	1
2310039H08Rik	0.00065488	0.0802922	0.299	0.233	1
Ldb1	0.000657252	-0.0826928	0.427	0.523	1
Zhx3	0.000658024	-0.0376036	0.064	0.113	1
Cdkn1b	0.000670904	-0.131725	0.545	0.624	1
Mrps36	0.000678202	0.12052	0.865	0.863	1
Ndufc1	0.000681875	0.088001	0.936	0.935	1
Ska3	0.000682595	-0.0606147	0.274	0.36	1
Usp1	0.000687208	-0.115916	0.888	0.941	1
Kmt2a	0.000708489	-0.137001	0.741	0.785	1
Cops8	0.000710983	0.0922329	0.577	0.515	1
Hmbs	0.000717419	0.111048	0.57	0.51	1
Ddit3	0.00071848	-0.15884	0.38	0.448	1
Suclg1	0.000726762	0.0879652	0.763	0.722	1
Xiap	0.000737372	-0.0979368	0.509	0.603	1
H2afz	0.000738493	0.0682572	1	0.998	1
Maz	0.00073916	-0.0943728	0.805	0.861	1
Mxd1	0.000760535	-0.0849495	0.177	0.247	1
Hist2h2bb	0.000772113	-0.141951	0.76	0.82	1
Nrip1	0.000783546	-0.087966	0.537	0.63	1
Lrrk1	0.000784999	-0.0650304	0.24	0.319	1
Pop7	0.000791064	0.096709	0.584	0.533	1
Ssh1	0.000796216	-0.0411035	0.081	0.134	1
Uchl5	0.000798292	0.103851	0.777	0.748	1
Klf10	0.000800594	-0.0490518	0.085	0.14	1
Arhgef3	0.000809044	-0.0584892	0.137	0.199	1
Tasp1	0.000810103	0.0549507	0.17	0.11	1
Aebp2	0.000825127	-0.107888	0.668	0.748	1
Nmt2	0.000825948	-0.0573034	0.312	0.402	1
Zfp593	0.000841769	0.0757524	0.522	0.451	1
Cox4i1	0.000842781	0.0669464	1	0.998	1
Mrpl34	0.000848326	0.0996854	0.801	0.748	1
Selenok	0.000854785	0.0893057	0.962	0.965	1
Rpl14	0.000861495	0.0888457	1	0.998	1
Ifi208	0.000865607	-0.122047	0.256	0.329	1
Mcm4	0.000868264	-0.118222	0.712	0.778	1
Uba7	0.000878095	-0.0537304	0.149	0.214	1
Mfsd6	0.00088363	-0.0510168	0.133	0.195	1
Hist1h2ai	0.000896224	-0.0679659	0.184	0.252	1
Atp1b3	0.000898006	-0.0952968	0.828	0.874	1
Atrx	0.000900108	-0.113763	0.895	0.943	1
Slc25a4	0.000903295	0.105954	0.975	0.978	1
Fkbp3	0.000916828	0.105757	0.975	0.959	1
Rpl5	0.000923141	-0.0902454	1	0.998	1
Ccng2	0.000924611	-0.106132	0.361	0.439	1
Gimap9	0.000930611	-0.0862253	0.646	0.75	1
Vps13b	0.000955358	-0.095178	0.291	0.364	1
Stk10	0.000957687	-0.102514	0.371	0.445	1
Zkscan17	0.000960105	-0.0299695	0.166	0.242	1
Knl1	0.00096614	-0.120848	0.825	0.901	1
Bax	0.000970358	0.090514	0.941	0.935	1
H2-T22	0.000989073	-0.168283	0.948	0.962	1
A630001G21Rik	0.000994852	-0.0480974	0.224	0.309	1
Gpbp1l1	0.0010097	-0.0872641	0.43	0.518	1
Ezh2	0.00101276	-0.104782	0.948	0.959	1
Zfpm1	0.00102412	-0.0544323	0.286	0.368	1
Tob1	0.0010272	-0.0461861	0.143	0.211	1
Scrib	0.00103475	-0.045	0.126	0.188	1
Ociad2	0.00104065	0.155313	0.471	0.41	1
Ddx17	0.00104253	-0.128835	0.645	0.716	1
Tceal9	0.00106244	-0.115496	0.837	0.89	1
Selenoh	0.00106332	0.107756	0.993	0.979	1
Prkce	0.00107695	-0.0629495	0.16	0.226	1
Luc7l2	0.00107808	-0.109872	0.982	0.987	1
Ddx60	0.00107939	-0.0855554	0.122	0.18	1
Arhgap30	0.00108649	-0.121027	0.876	0.912	1
Pknox1	0.00109082	-0.0633744	0.241	0.317	1
Nono	0.00111605	-0.0918813	0.936	0.96	1
Cyb5d2	0.00111832	-0.0502057	0.109	0.163	1
Hist1h4j	0.00112548	-0.0527399	0.153	0.22	1
Epb41l2	0.00112572	-0.0819438	0.3	0.381	1
Psph	0.00112619	0.0947979	0.744	0.691	1
Dpp4	0.00115903	-0.0683461	0.308	0.391	1
Dhx40	0.0011631	-0.0602527	0.219	0.29	1
Fbxl14	0.00118489	-0.0918869	0.425	0.501	1
Clspn	0.00118942	-0.104053	0.801	0.863	1
AW112010	0.00119308	0.09619	1	0.997	1
Kat6a	0.00119578	-0.0707041	0.429	0.52	1
Itch	0.00119824	-0.0855777	0.453	0.534	1
Pcgf5	0.00120192	-0.081603	0.419	0.502	1
Magi3	0.00121463	-0.0511148	0.091	0.144	1
Vrk2	0.00122008	-0.0861941	0.364	0.447	1
Acbd3	0.00122081	-0.0754916	0.455	0.542	1
Ap1s2	0.00122937	-0.0612729	0.517	0.604	1
Snapc2	0.00123219	-0.044312	0.094	0.147	1
Kti12	0.0012337	0.0659961	0.217	0.158	1
Zbtb4	0.00123986	-0.0396365	0.061	0.107	1
Xrcc5	0.00124053	0.0612142	0.302	0.233	1
Snrpa	0.00124208	0.101155	0.762	0.726	1
Ppp2r5c	0.00124657	-0.109268	0.691	0.743	1
Slc30a9	0.00125479	-0.0725618	0.316	0.399	1
Rplp2	0.00127156	-0.0488223	1	1	1
Map3k1	0.00128697	-0.0698876	0.398	0.486	1
Susd6	0.00129478	-0.0574664	0.161	0.226	1
Taldo1	0.00130145	0.0952442	0.965	0.946	1
Add3	0.00131385	-0.104453	0.603	0.684	1
Rbm15	0.0013139	-0.0999656	0.434	0.514	1
Csde1	0.00131692	-0.0998107	0.818	0.856	1
Ruvbl1	0.00132375	0.101572	0.631	0.603	1
Bend4	0.00132517	-0.0564637	0.106	0.161	1
Snx20	0.00132712	-0.0768625	0.414	0.499	1
Smim11	0.00134053	0.0927952	0.796	0.753	1
Nip7	0.00134329	0.116425	0.594	0.526	1
Farsa	0.00134409	0.0837791	0.564	0.498	1
Ptrh2	0.00134899	0.0892903	0.546	0.488	1
Satb1	0.00135671	-0.113528	0.453	0.534	1
Ppp1cb	0.00136021	-0.0629822	0.643	0.73	1
Abcb1a	0.00136977	-0.0764378	0.148	0.212	1
Kif21b	0.00137156	-0.0740742	0.254	0.332	1
Cbx6	0.0013824	-0.0562092	0.123	0.18	1
Mien1	0.00138398	0.110917	0.844	0.828	1
Tor1aip2	0.00138846	-0.0622115	0.272	0.348	1
Ppp2r5d	0.00139018	-0.0518187	0.216	0.287	1
Pgm3	0.00139578	0.0590184	0.189	0.132	1
Mrpl11	0.00139866	0.101846	0.59	0.528	1
Psmd12	0.00140054	0.122661	0.821	0.825	1
Cyb561d2	0.00140136	0.0859785	0.474	0.404	1
Uqcrc1	0.00141082	0.108959	0.862	0.829	1
Grpel1	0.00142493	0.0908513	0.779	0.797	1
Mkln1	0.00143063	-0.0719194	0.546	0.64	1
Tespa1	0.00143533	-0.092816	0.122	0.177	1
Cd2	0.00143701	0.14836	0.865	0.842	1
Rpl21	0.00143822	-0.0617524	1	0.998	1
Clk1	0.00144036	-0.0892311	0.751	0.826	1
Mcmbp	0.00144405	-0.0832486	0.488	0.561	1
Fam107b	0.00144819	-0.0838299	0.784	0.85	1
Mrps21	0.00145771	0.0844536	0.933	0.923	1
Nt5c	0.00146639	0.107132	0.876	0.834	1
Zfp738	0.0014737	-0.042365	0.074	0.121	1
Hist1h2ad	0.00148767	-0.0704951	0.179	0.249	1
C2cd3	0.00149023	-0.0706373	0.344	0.423	1
Sav1	0.00149631	-0.0400708	0.151	0.215	1
Hist1h2bl	0.00149811	-0.177652	0.653	0.699	1
Mef2a	0.00152045	-0.0995315	0.579	0.66	1
Zbtb45	0.00152246	-0.0436023	0.174	0.241	1
Gm10260	0.00152409	0.144378	0.861	0.813	1
Brca1	0.00152516	-0.0889813	0.457	0.533	1
Gar1	0.00152626	0.134494	0.683	0.668	1
Mcm7	0.00152812	-0.0797262	0.869	0.901	1
Sfxn1	0.00153051	0.123281	0.741	0.707	1
Actb	0.00153082	0.0865151	1	1	1
Sf3b6	0.00154546	0.0940549	0.961	0.954	1
Rad51ap1	0.00154691	-0.0962596	0.71	0.775	1
Tbcb	0.00157099	0.0837987	0.72	0.687	1
Hist1h2bc	0.00157804	-0.0771547	0.46	0.558	1
Lamtor1	0.00158295	0.0922344	0.849	0.834	1
Hist1h2bb	0.00160137	-0.125284	0.595	0.676	1
Pbk	0.00160417	-0.107908	0.622	0.703	1
Elk3	0.00160455	-0.0959064	0.749	0.807	1
Capn2	0.00160932	-0.059163	0.352	0.443	1
Cobll1	0.00160941	-0.0470515	0.157	0.222	1
Pim1	0.00161022	-0.0614858	0.707	0.786	1
Hist1h1a	0.00161586	-0.112659	0.607	0.675	1
Il21r	0.00161773	-0.0739124	0.328	0.405	1
Wdr37	0.0016257	-0.049697	0.16	0.222	1
Baz1b	0.00163059	-0.136754	0.753	0.796	1
Rps8	0.00163205	0.049985	1	1	1
Mrps17	0.00163361	0.104572	0.804	0.783	1
Znrd1	0.00164911	0.0984237	0.81	0.791	1
Opa3	0.0016514	-0.0548664	0.178	0.244	1
Rbm39	0.00167489	-0.110549	0.998	0.997	1
Cd5	0.0016792	-0.0736224	0.533	0.616	1
Ska2	0.00168107	-0.0815402	0.494	0.598	1
Slc35b1	0.00169076	0.0793477	0.494	0.427	1
AW549877	0.00169949	-0.0617494	0.148	0.207	1
Tmx4	0.00170261	-0.0771869	0.295	0.37	1
Traf2	0.00172473	-0.0656498	0.424	0.498	1
Zxdb	0.00174189	-0.0339665	0.09	0.14	1
Rpl10-ps3	0.00174271	-0.1155	0.937	0.952	1
Prdx3	0.00175054	0.10026	0.573	0.547	1
Gtf2i	0.00175387	-0.0836527	0.35	0.419	1
Zfp458	0.00176256	-0.042084	0.102	0.156	1
Rplp0	0.00176334	0.0598303	1	1	1
Tmem126a	0.00176669	0.119907	0.856	0.85	1
Chchd1	0.00177134	0.0997729	0.89	0.869	1
Prpf8	0.00178706	-0.0899359	0.621	0.713	1
Capza1	0.00178769	-0.0940982	0.935	0.96	1
Uchl3	0.00179084	0.114133	0.805	0.807	1
Ifitm1	0.00179207	0.368	0.207	0.144	1
Gpr171	0.0018076	-0.0947301	0.393	0.472	1
Scly	0.00181537	-0.0577526	0.296	0.365	1
Tmem38b	0.00182187	-0.0481684	0.15	0.211	1
Pik3c2a	0.00182638	-0.0727615	0.202	0.27	1
Slc16a11	0.00184588	0.125597	0.581	0.509	1
Carmil2	0.00185726	-0.0482365	0.132	0.19	1
Kiz	0.00186712	-0.0426969	0.114	0.169	1
Arhgap17	0.00187386	-0.0770161	0.524	0.62	1
Gng5	0.00187607	0.0730802	0.991	0.994	1
Tle3	0.00188984	-0.0572578	0.196	0.265	1
Hist1h4a	0.00189693	-0.0988538	0.34	0.407	1
mt-Nd2	0.00189882	-0.0912046	1	0.998	1
Zmat5	0.00190935	0.0922861	0.632	0.569	1
Minos1	0.00191376	0.0785311	0.997	0.989	1
Emc8	0.00191675	0.0966503	0.693	0.675	1
Pdia4	0.00191965	0.0889074	0.684	0.644	1
Msn	0.00192457	-0.100134	0.948	0.965	1
Pdk1	0.00192664	-0.0494471	0.075	0.121	1
Pdzd11	0.00194058	0.079271	0.562	0.51	1
Diaph2	0.00195079	-0.0606728	0.158	0.219	1
Polm	0.00196693	-0.0528299	0.129	0.187	1
Map4k2	0.00196939	-0.0549887	0.251	0.329	1
Ubr5	0.00196989	-0.0721995	0.438	0.528	1
Cracr2a	0.00198788	-0.0506904	0.105	0.156	1
Fam53b	0.00200597	-0.0685226	0.192	0.255	1
Ddah2	0.00201172	-0.0557119	0.153	0.214	1
Mxi1	0.00201878	-0.101601	0.322	0.391	1
Cep192	0.00206976	-0.108172	0.558	0.632	1
Crebzf	0.00207016	-0.0860608	0.563	0.641	1
Stat4	0.00207785	-0.0861643	0.518	0.598	1
Kpna3	0.00208962	-0.101416	0.494	0.553	1
Sla	0.0020953	-0.100716	0.534	0.62	1
Cox17	0.00209805	0.103163	0.993	0.992	1
Pdgfb	0.00210155	-0.0548241	0.158	0.22	1
Dap	0.0021072	-0.0942286	0.798	0.861	1
Sipa1l1	0.00210819	-0.0844613	0.536	0.62	1
Ncor2	0.00211011	-0.0649728	0.401	0.486	1
Atad2	0.00211323	-0.138095	0.822	0.86	1
Wasf2	0.00211796	-0.0918438	0.831	0.917	1
Exosc7	0.0021198	0.0992622	0.685	0.656	1
Rapgef1	0.00214834	-0.0693957	0.385	0.461	1
Psmd1	0.00215315	0.0874538	0.697	0.638	1
Tspan31	0.00217249	0.0956705	0.415	0.359	1
Snrpd3	0.002176	0.112362	0.865	0.872	1
AU020206	0.00218597	-0.0924576	0.408	0.488	1
Pno1	0.00220206	0.100908	0.476	0.415	1
Ctbp1	0.00220391	-0.0801672	0.769	0.805	1
P4ha1	0.00221124	-0.0799073	0.266	0.335	1
Gsk3b	0.00222066	-0.102141	0.723	0.778	1
Ppp3cc	0.00222082	-0.0782404	0.623	0.697	1
Anapc4	0.00222547	-0.0572507	0.31	0.394	1
Ttc28	0.00222932	-0.0417388	0.07	0.113	1
Hist2h3b	0.0022421	-0.0459121	0.233	0.314	1
Tbc1d15	0.00226221	-0.0564961	0.377	0.469	1
Mrpl13	0.00227259	0.0913437	0.861	0.829	1
Exosc5	0.00228747	0.0972301	0.646	0.603	1
1700048O20Rik	0.00229835	-0.0287997	0.063	0.107	1
Hist1h3d	0.0023065	-0.0750625	0.231	0.301	1
Sh3bgrl3	0.00234125	0.0797444	1	1	1
Clpp	0.00234902	0.0851697	0.447	0.384	1
Scd2	0.00236299	-0.122886	0.553	0.617	1
Exoc6	0.00236893	-0.0620106	0.191	0.255	1
Tra2a	0.0023946	-0.0859931	0.92	0.935	1
Aasdhppt	0.00239833	0.068854	0.443	0.375	1
Srsf9	0.00240014	0.0965235	0.839	0.815	1
Mrps7	0.00240117	0.116815	0.685	0.649	1
Gm10138	0.0024018	-0.0465509	0.094	0.144	1
Npm3	0.0024083	0.109813	0.891	0.911	1
Dynll1	0.0024094	0.103108	0.987	0.978	1
Rif1	0.00244588	-0.129746	0.73	0.783	1
Cep295	0.00245641	-0.0777887	0.501	0.587	1
Irf2bp2	0.00248522	-0.0713287	0.33	0.41	1
Stard3nl	0.00251604	0.0944606	0.8	0.786	1
Rnf2	0.0025193	-0.0493002	0.201	0.27	1
Commd3	0.00252911	0.0796566	0.893	0.866	1
Tm2d3	0.00253914	0.086174	0.478	0.415	1
Pds5a	0.00254713	-0.0963315	0.675	0.774	1
Nusap1	0.00256923	-0.114716	0.946	0.967	1
Esyt2	0.00256985	-0.0844746	0.46	0.531	1
Zmynd8	0.0025749	-0.0667394	0.312	0.402	1
Calu	0.00258341	-0.0808274	0.503	0.59	1
Mrpl51	0.00259482	0.0835352	0.884	0.887	1
Dnajc19	0.00261081	0.0854829	0.844	0.837	1
Git2	0.00261195	-0.0853773	0.623	0.687	1
Smad7	0.00261492	-0.0979733	0.451	0.536	1
Arpc4	0.00262116	0.101449	0.988	0.976	1
Pglyrp1	0.00262473	0.116367	0.93	0.931	1
Snx14	0.00262895	-0.0474545	0.091	0.139	1
Hist1h2bf	0.00263094	-0.0609898	0.156	0.217	1
Kif18b	0.00263729	-0.0574697	0.218	0.287	1
Rp2	0.00264129	-0.0497362	0.143	0.199	1
Rpl32	0.00265261	0.0522308	1	0.998	1
Rab8b	0.00267064	-0.113378	0.781	0.839	1
Efr3a	0.00269097	-0.0865502	0.548	0.616	1
Fbxw2	0.00270391	-0.0834147	0.64	0.735	1
Polr2f	0.00272743	0.0923106	0.915	0.879	1
Ctsw	0.00277393	-0.100005	0.932	0.951	1
Ncapd2	0.00278577	-0.0850252	0.612	0.694	1
Plp2	0.00279964	-0.123912	0.891	0.917	1
Smc6	0.0028013	-0.10754	0.957	0.982	1
Rnf125	0.00280451	-0.0545975	0.271	0.348	1
Cacybp	0.00280664	0.0993069	0.87	0.863	1
Runx3	0.00280756	-0.0921306	0.89	0.93	1
Unc119	0.00280769	0.0893208	0.803	0.758	1
Csnk1a1	0.00282505	-0.0930619	0.943	0.974	1
Rpl31	0.00283044	-0.0732007	0.997	0.997	1
Rngtt	0.00285683	-0.0672591	0.399	0.49	1
Inpp4b	0.00287198	-0.146048	0.77	0.837	1
Snapc1	0.00288117	-0.0544707	0.322	0.402	1
Psmd13	0.00289623	0.09956	0.881	0.848	1
Nfatc2ip	0.00291653	-0.058607	0.387	0.463	1
Ap3m2	0.00292193	-0.0398077	0.099	0.148	1
Calr	0.00293156	0.09263	0.97	0.965	1
Cox8a	0.00295697	0.0542938	0.997	0.998	1
Nsd2	0.00295903	-0.124422	0.844	0.901	1
Polr2c	0.00297221	0.101838	0.83	0.842	1
Dyrk1a	0.00298454	-0.0698359	0.347	0.427	1
Tnrc6c	0.00298647	-0.10694	0.555	0.632	1
Otub1	0.00298929	0.0803131	0.557	0.502	1
Pinx1	0.00298961	0.0734368	0.266	0.204	1
Selenos	0.00299622	0.0904769	0.698	0.656	1
Pnrc1	0.00300692	-0.103292	0.889	0.911	1
Ctla2a	0.00301323	-0.152725	0.855	0.876	1
Hook2	0.00301823	-0.0375279	0.068	0.112	1
Dr1	0.00302842	-0.0743647	0.424	0.507	1
Snrnp40	0.00303551	0.0837842	0.823	0.793	1
Lsm14a	0.00304633	-0.0746199	0.59	0.668	1
Dcaf11	0.00307381	-0.0460515	0.288	0.367	1
Ak6	0.00309101	0.085951	0.61	0.553	1
Nfkbie	0.00309366	-0.0572261	0.215	0.279	1
Ubr7	0.00309473	-0.065078	0.367	0.453	1
Mknk2	0.00310521	-0.0614034	0.518	0.62	1
Tnks2	0.00311428	-0.0792995	0.53	0.611	1
Rrp7a	0.00313178	0.0831763	0.487	0.442	1
Sumo1	0.00313492	0.0873449	0.93	0.93	1
Strbp	0.00314339	-0.0717797	0.416	0.494	1
Tcf25	0.0031499	-0.0888545	0.822	0.868	1
Pou2f2	0.003192	-0.0470329	0.148	0.204	1
Hist1h4f	0.00320076	-0.0326419	0.121	0.177	1
Mast3	0.0032084	-0.0613179	0.296	0.375	1
Rin3	0.00320995	-0.0592904	0.27	0.341	1
Rttn	0.00321643	-0.0384653	0.093	0.142	1
Dhrs13	0.0032327	0.0476627	0.166	0.115	1
Slc17a6	0.00324636	-0.199817	0.353	0.419	1
Inpp5d	0.00325221	-0.088157	0.412	0.491	1
Gpr174	0.0033103	-0.0606957	0.558	0.646	1
Taf11	0.00332287	0.0791769	0.554	0.498	1
Fgl2	0.00335098	-0.161095	0.669	0.705	1
Glipr1	0.00335191	0.105389	0.83	0.797	1
Agpat2	0.00335795	0.068561	0.264	0.211	1
Jak2	0.0033629	-0.0483722	0.212	0.278	1
Lmf2	0.0033882	-0.0616332	0.314	0.392	1
Noc4l	0.00339133	0.0748547	0.405	0.346	1
Oxr1	0.00339338	-0.0377193	0.176	0.241	1
Lap3	0.00340708	0.0859316	0.414	0.351	1
Fosl2	0.00340936	-0.0799468	0.279	0.354	1
A630072M18Rik	0.003418	-0.0389535	0.128	0.183	1
Tspo	0.00342745	0.0745884	0.988	0.984	1
Lancl2	0.00343018	-0.0257097	0.059	0.1	1
Ndufb2	0.0034357	0.0893448	0.891	0.887	1
Map2	0.00344912	-0.0365812	0.114	0.164	1
Bcl7c	0.00346095	0.0836517	0.83	0.818	1
Ube2i	0.00346755	0.084825	0.991	0.986	1
Cers4	0.00348368	-0.0668718	0.568	0.649	1
2900026A02Rik	0.00348651	-0.0941944	0.395	0.469	1
Phc2	0.00349329	-0.0706684	0.298	0.368	1
Hddc2	0.00349624	0.0788101	0.553	0.486	1
Tle4	0.00349912	-0.0927508	0.403	0.466	1
Akap13	0.00352067	-0.122945	0.941	0.963	1
Zfp868	0.00353767	-0.0362718	0.122	0.175	1
Phb	0.00355253	0.100252	0.61	0.553	1
Med23	0.00356213	-0.0299697	0.103	0.155	1
Tsfm	0.00356328	0.0843625	0.588	0.549	1
Bicd2	0.00360892	-0.0630569	0.235	0.305	1
Fgf13	0.00361215	-0.0417964	0.081	0.126	1
Cenpl	0.00361626	-0.0723334	0.535	0.625	1
Timm17b	0.00362898	0.0758417	0.765	0.721	1
Srp54a	0.00364314	-0.0495138	0.166	0.225	1
Cd8b1	0.00365923	-0.0984098	0.988	0.997	1
Il2rg	0.00366929	-0.115595	0.847	0.869	1
Fxr2	0.00369762	-0.0476893	0.201	0.268	1
4932438A13Rik	0.00371204	-0.0774194	0.558	0.641	1
Shoc2	0.00373141	-0.0563989	0.317	0.396	1
Rapsn	0.00373196	0.0537333	0.198	0.144	1
Mpc1	0.00373801	0.0897364	0.777	0.786	1
Elovl1	0.00374395	0.0891212	0.533	0.498	1
Ndufs3	0.00375561	0.0980179	0.812	0.78	1
Cox18	0.00376323	0.104987	0.592	0.55	1
Crlf3	0.00376985	-0.100474	0.742	0.797	1
Bcl11b	0.00377215	-0.0978034	0.544	0.614	1
Uqcr10	0.00379635	0.0806755	0.986	0.979	1
Samd1	0.00381589	-0.0759165	0.314	0.392	1
Csf1	0.00382749	-0.0865052	0.429	0.504	1
Hdgfl3	0.00384675	-0.0624614	0.151	0.207	1
Gtpbp1	0.0038632	-0.0584986	0.308	0.381	1
Ints11	0.0038666	0.111674	0.654	0.617	1
Sars	0.00387415	-0.123775	0.846	0.872	1
Ahcyl1	0.00387486	-0.0672317	0.533	0.632	1
Sec62	0.00387737	-0.105383	0.91	0.936	1
Rap1gds1	0.00390143	-0.0501985	0.28	0.356	1
Tln1	0.00391657	-0.091135	0.932	0.951	1
Lmnb1	0.00393939	-0.0943861	0.955	0.973	1
Ncoa3	0.00396369	-0.0533635	0.247	0.313	1
Brip1	0.00399422	-0.0978076	0.413	0.48	1
Psmd14	0.00401513	0.0931164	0.859	0.844	1
Jakmip1	0.00403	-0.0505176	0.213	0.279	1
Sat1	0.00404458	-0.139282	0.703	0.75	1
Dcaf8	0.00406683	-0.0766598	0.394	0.474	1
Mrps25	0.00408567	0.0887005	0.66	0.64	1
4930523C07Rik	0.00408947	-0.0992889	0.571	0.619	1
C330007P06Rik	0.00409176	-0.0568706	0.383	0.453	1
Csnk1e	0.00409698	-0.0366408	0.134	0.19	1
B3glct	0.00412697	-0.0541975	0.156	0.212	1
Ccng1	0.00413198	-0.1017	0.573	0.646	1
Ctsd	0.00414448	0.0994438	0.995	0.989	1
Suv39h1	0.00416416	-0.0598706	0.445	0.533	1
Otud7b	0.00417172	-0.0536915	0.177	0.238	1
Denr	0.00417675	0.0832271	0.876	0.848	1
Itga4	0.0041826	-0.167184	0.839	0.882	1
Capn7	0.00419824	-0.0637134	0.218	0.284	1
Tbl1xr1	0.00420069	-0.0792753	0.419	0.49	1
Tra2b	0.00421751	-0.10817	0.978	0.987	1
Fam46a	0.00422503	-0.051795	0.158	0.215	1
Nop58	0.00425454	0.0933973	0.856	0.839	1
Arhgap11a	0.00426427	-0.095281	0.585	0.656	1
Ddx6	0.00429572	-0.109135	0.668	0.735	1
Supt20	0.00431159	-0.0972604	0.536	0.6	1
Tmem33	0.00432016	0.0690911	0.555	0.49	1
Polg	0.00434901	-0.0609017	0.19	0.254	1
Zranb1	0.00436494	-0.0483377	0.322	0.397	1
Lrif1	0.0043707	-0.0786444	0.457	0.531	1
Zbtb41	0.00438562	-0.0394164	0.112	0.161	1
Gpsm2	0.00439214	-0.0706068	0.212	0.274	1
Bcap31	0.00439879	0.0844716	0.882	0.884	1
Tmem71	0.00440157	-0.0941927	0.437	0.498	1
Rpl29	0.00440915	0.0782664	0.397	0.344	1
Commd2	0.00443334	0.0771693	0.638	0.573	1
Rufy2	0.00444176	-0.0547053	0.163	0.215	1
Smchd1	0.00444226	-0.0949351	0.926	0.971	1
Polr2k	0.00445805	0.0940898	0.899	0.861	1
Arf5	0.00447341	0.0519953	0.993	0.997	1
Rps6ka5	0.00447463	-0.0391498	0.078	0.121	1
Mis12	0.00447575	-0.0716731	0.369	0.439	1
Prdx6	0.00448471	0.100873	0.94	0.914	1
2010111I01Rik	0.00448723	0.0946435	0.807	0.797	1
Nt5e	0.00451768	-0.0396598	0.074	0.116	1
Papd7	0.00452331	-0.0530646	0.166	0.223	1
Tnrc18	0.00452486	-0.0487353	0.234	0.303	1
Cux1	0.00453114	-0.0672077	0.31	0.376	1
Sp4	0.00455337	-0.08469	0.394	0.472	1
Lgals3	0.00457885	0.134241	0.942	0.912	1
Kcnk5	0.00460997	-0.049336	0.15	0.203	1
Akr7a5	0.00461427	0.0590119	0.212	0.163	1
Tuba1c	0.00463043	0.118768	0.939	0.935	1
Tmem39a	0.00463488	-0.0340392	0.143	0.199	1
Ndc80	0.00463806	-0.0867142	0.672	0.732	1
Casp2	0.00466422	-0.0473426	0.227	0.293	1
Helq	0.00466612	-0.04153	0.146	0.201	1
Cd86	0.00470854	-0.0706578	0.164	0.222	1
Atad5	0.00471447	-0.0989317	0.528	0.592	1
Atl2	0.00471462	-0.0525719	0.25	0.321	1
Slfn1	0.00473281	-0.128501	0.305	0.373	1
Ndufa1	0.00475993	-0.0687999	0.969	0.96	1
Trim56	0.00478483	-0.0729045	0.248	0.306	1
Crmp1	0.004788	-0.0364098	0.085	0.129	1
Abracl	0.00478936	0.0865451	0.989	0.987	1
Foxj2	0.00479022	-0.0286384	0.102	0.15	1
Isyna1	0.0047945	0.110289	0.537	0.499	1
Orai2	0.0047952	-0.0257878	0.109	0.159	1
Dapk2	0.00480459	-0.0773307	0.406	0.477	1
Ifi203	0.00482562	-0.161291	0.905	0.917	1
Arap2	0.00484127	-0.0827063	0.42	0.488	1
Llph	0.00486418	0.0952796	0.867	0.876	1
Gm26541	0.00486523	-0.01574	0.064	0.105	1
Trmt1	0.00488458	0.0738692	0.274	0.222	1
Gnai3	0.00489105	-0.0734574	0.7	0.759	1
Atp2b4	0.00489756	-0.106568	0.488	0.541	1
Ncf4	0.00491636	0.0846785	0.918	0.893	1
Xpot	0.00491916	-0.0673146	0.377	0.447	1
Atp5b	0.00493746	0.073471	1	0.997	1
Ski	0.00493774	-0.0515244	0.117	0.166	1
Erlec1	0.00493875	-0.0597465	0.423	0.51	1
Stk40	0.00494652	-0.0574842	0.267	0.333	1
Arid5b	0.00495682	-0.0931368	0.564	0.641	1
2210011C24Rik	0.00497882	-0.0459556	0.1	0.147	1
Wipf1	0.00498185	-0.0854785	0.738	0.829	1
Cdk12	0.00498426	-0.0746501	0.622	0.7	1
Tmem170b	0.00500479	-0.0352573	0.095	0.14	1
Mrpl4	0.0050341	0.0855221	0.785	0.777	1
Hps6	0.00504215	-0.0363751	0.073	0.113	1
Dpysl2	0.0050443	-0.0839068	0.608	0.681	1
Phf1	0.0050644	-0.0267448	0.083	0.129	1
Vti1a	0.00507335	-0.0527929	0.295	0.354	1
Dmac2	0.0050738	-0.0359023	0.183	0.246	1
Dpy30	0.0050846	0.0847516	0.909	0.893	1
Ireb2	0.00510118	-0.0504676	0.234	0.298	1
Rpl28	0.00510752	0.0425781	1	1	1
Arhgef18	0.00514532	-0.0375527	0.104	0.153	1
Uhrf1	0.00518293	-0.097552	0.694	0.75	1
Cd3d	0.00519225	0.0786016	0.997	0.994	1
Ndufv1	0.00519359	0.0777637	0.785	0.754	1
Tmem208	0.00520689	0.0840422	0.75	0.718	1
Coq10b	0.00526929	-0.0711921	0.358	0.424	1
Setd2	0.00530184	-0.0833495	0.476	0.549	1
Shc1	0.00531515	-0.0447643	0.303	0.376	1
Pet100	0.00532833	-0.0824987	0.709	0.774	1
Themis	0.00535691	-0.0690304	0.705	0.766	1
Ap1s1	0.00536802	0.0864831	0.695	0.662	1
Gpi1	0.00537947	-0.0789291	0.982	0.984	1
Arl1	0.00538056	0.081845	0.783	0.794	1
Hs2st1	0.00538443	-0.0475188	0.171	0.228	1
Ccp110	0.00540567	-0.0596142	0.276	0.34	1
Dennd5a	0.00546778	-0.0368028	0.164	0.223	1
Apaf1	0.00546901	-0.0561474	0.261	0.33	1
Mndal	0.00547097	-0.183001	0.924	0.955	1
Srgn	0.00547788	-0.0893448	0.993	0.99	1
Fam210a	0.00549027	-0.0339489	0.099	0.145	1
Ralbp1	0.00550225	-0.0925473	0.847	0.89	1
Slc7a5	0.00552173	-0.0729166	0.403	0.477	1
Tbc1d5	0.00554253	-0.0495013	0.194	0.257	1
Polr2b	0.00554527	-0.0493042	0.416	0.496	1
Ube2d3	0.00558652	0.0656629	0.989	0.986	1
Mrpl35	0.0056265	0.0889907	0.714	0.681	1
Ganc	0.00567377	-0.0463263	0.112	0.159	1
Trpm7	0.00567565	-0.0652776	0.44	0.534	1
Ctsc	0.00569955	0.0774667	0.713	0.686	1
Zfhx2	0.00576119	-0.0406017	0.093	0.137	1
Churc1	0.00577895	0.0906906	0.791	0.754	1
Krit1	0.00578192	-0.100549	0.687	0.737	1
Ets1	0.00578542	-0.119389	0.954	0.957	1
Ppid	0.00579163	0.109359	0.673	0.66	1
Sin3b	0.00580118	0.0997044	0.903	0.882	1
Gm11127	0.00581625	-0.0414813	0.223	0.29	1
Clic4	0.00582611	-0.099662	0.569	0.638	1
Wdr26	0.00585287	-0.0781858	0.655	0.713	1
Gmds	0.00587261	0.0787438	0.553	0.502	1
Rtraf	0.00589914	0.0691695	0.974	0.965	1
Rmnd5b	0.00590503	0.0753232	0.371	0.317	1
Rell1	0.00590788	-0.0255766	0.084	0.128	1
Jagn1	0.00591817	0.0670639	0.371	0.316	1
Mpp5	0.00598142	-0.0477346	0.096	0.139	1
Clint1	0.00599201	-0.0841076	0.521	0.592	1
Cntrob	0.00601134	-0.0566014	0.199	0.26	1
Ndufa5	0.00602341	0.0877195	0.893	0.882	1
Ccdc107	0.00605018	0.0876772	0.532	0.486	1
Adal	0.00605956	-0.0269446	0.07	0.11	1
Ubash3a	0.00607969	-0.0586888	0.21	0.271	1
Mrpl57	0.00609219	0.0814994	0.926	0.925	1
Paip2	0.00609389	-0.0733009	0.906	0.936	1
Ttc32	0.00610238	-0.044634	0.286	0.364	1
Rbmx	0.00612964	-0.074776	0.42	0.491	1
Map3k2	0.00614053	-0.0583979	0.307	0.376	1
Fxr1	0.00616623	-0.0951796	0.631	0.699	1
Anxa2	0.00618505	0.095528	0.993	0.995	1
Ctcf	0.00620292	-0.103473	0.903	0.936	1
Ppic	0.00620795	-0.0405141	0.165	0.226	1
Vti1b	0.00621919	0.0748017	0.634	0.596	1
Nfyc	0.00624329	-0.0560759	0.322	0.396	1
Utp18	0.00625595	0.0826979	0.426	0.373	1
Tbc1d1	0.0062617	-0.0537235	0.436	0.515	1
Mrpl28	0.0062807	0.084472	0.723	0.686	1
Tbc1d13	0.00628698	-0.0244422	0.07	0.11	1
Pbrm1	0.00630935	-0.106832	0.844	0.871	1
Gmip	0.00632677	-0.0574126	0.301	0.372	1
Desi2	0.00636841	0.0656211	0.405	0.338	1
Birc6	0.00637703	-0.0829312	0.778	0.813	1
Eif1ax	0.00640875	0.092152	0.934	0.927	1
Scaf8	0.00641021	-0.0520746	0.272	0.341	1
Dtd1	0.00641783	0.0782651	0.566	0.51	1
Fkbp2	0.00643606	0.0826126	0.919	0.907	1
Rnf38	0.00644006	-0.0365949	0.165	0.222	1
Saraf	0.00644654	-0.0931491	0.769	0.826	1
Yae1d1	0.00646777	0.0429901	0.162	0.115	1
Rfc5	0.00647356	0.0825454	0.829	0.812	1
Aprt	0.00650413	0.101369	0.978	0.957	1
Prmt7	0.00653033	0.052808	0.317	0.26	1
1810058I24Rik	0.006544	0.0805483	0.795	0.804	1
Sco1	0.00656097	-0.0421516	0.103	0.15	1
Elf4	0.00657405	-0.053478	0.373	0.445	1
Nudcd3	0.00662382	-0.052937	0.583	0.66	1
Cct3	0.00663892	0.113519	0.864	0.831	1
Arl3	0.00667297	-0.0726729	0.35	0.413	1
C1galt1	0.00670459	-0.085214	0.545	0.59	1
Pecam1	0.0067313	-0.0504685	0.118	0.164	1
Hnrnpul2	0.00674282	-0.0602945	0.668	0.754	1
Vma21	0.00674504	0.0959732	0.733	0.719	1
Mad2l1	0.00676087	-0.0879768	0.82	0.845	1
Aida	0.00676926	-0.0552987	0.408	0.483	1
Zgrf1	0.00677925	-0.0612236	0.251	0.316	1
Cntrl	0.00678958	-0.0899022	0.899	0.92	1
Fbxo28	0.00682163	-0.0540853	0.219	0.276	1
Ikbip	0.00683752	-0.0316946	0.119	0.167	1
Mllt3	0.00685112	-0.0577606	0.451	0.528	1
Raph1	0.00686637	-0.0759847	0.433	0.52	1
Relb	0.00687298	-0.0866224	0.301	0.359	1
Senp6	0.0068827	-0.0932336	0.753	0.812	1
Ier3	0.0068907	0.0568043	0.335	0.271	1
1810013L24Rik	0.00691256	-0.030531	0.179	0.241	1
Myh9	0.00691436	-0.114623	0.934	0.962	1
Mrpl41	0.0070229	0.100946	0.661	0.612	1
Fkrp	0.00705059	-0.0353429	0.144	0.199	1
Mbtps2	0.00705376	-0.0375682	0.149	0.204	1
Shkbp1	0.00705746	-0.0688814	0.279	0.335	1
Gapdh	0.00706632	0.0586227	1	1	1
Nifk	0.00713934	0.0903101	0.505	0.455	1
Kif1b	0.00717449	-0.0691637	0.141	0.193	1
Sf3b2	0.00722922	-0.0812961	0.963	0.987	1
Ik	0.00723263	-0.0691184	0.663	0.735	1
Prkaca	0.00724406	-0.0644078	0.29	0.351	1
Atg16l1	0.00726373	-0.062338	0.213	0.271	1
Atp6v1f	0.00729346	0.0613089	0.978	0.984	1
Grap	0.00732158	-0.0766513	0.695	0.77	1
Rap2a	0.00736608	-0.0604288	0.335	0.41	1
Brd3	0.00737522	-0.0541781	0.261	0.329	1
Pou2f1	0.00738797	-0.0411964	0.251	0.319	1
Rps5	0.00742546	0.0459039	1	1	1
Gm47761	0.00744953	-0.0482868	0.205	0.268	1
Fos	0.00745742	-0.0116216	0.385	0.475	1
Psap	0.00749572	-0.0517326	0.662	0.705	1
Rsf1	0.00756742	-0.0906031	0.502	0.557	1
Eif4b	0.00756899	-0.081003	0.793	0.847	1
Ctu2	0.00758927	0.0516382	0.316	0.258	1
Ccnt1	0.00759534	-0.0749672	0.44	0.525	1
Cdk4	0.00761727	0.0864766	0.917	0.933	1
Zfp236	0.00768429	-0.0645266	0.122	0.171	1
Dync1li1	0.00768789	-0.0567623	0.46	0.537	1
Tbc1d8b	0.00771553	-0.0262171	0.071	0.11	1
Polr2j	0.00774524	0.0829751	0.91	0.931	1
Fmnl1	0.00777959	-0.0878605	0.641	0.705	1
Cenpj	0.00778065	-0.0599964	0.307	0.375	1
Kansl3	0.00780479	-0.0606166	0.346	0.411	1
Retreg3	0.00780794	-0.0373042	0.187	0.25	1
Mark2	0.00785031	-0.0812013	0.56	0.632	1
Mprip	0.0078523	-0.0556767	0.256	0.321	1
Cic	0.0078528	-0.0595834	0.289	0.36	1
Stk35	0.0078596	-0.0313321	0.113	0.161	1
Dpp8	0.00787874	-0.0679419	0.416	0.49	1
Cd3g	0.00791824	0.0560531	0.998	1	1
Glcci1	0.00792282	-0.0388314	0.081	0.121	1
Zc3h4	0.00792312	-0.0529045	0.236	0.297	1
Ino80d	0.00792326	-0.0475596	0.329	0.399	1
Mtx1	0.00795241	0.0775655	0.473	0.421	1
Wnk1	0.00796071	-0.110553	0.934	0.96	1
Noa1	0.00798814	0.075722	0.361	0.316	1
Arhgdib	0.00801031	0.0766324	0.998	0.992	1
Uxt	0.00802492	0.0749739	0.4	0.356	1
Mtch2	0.00804009	0.087448	0.758	0.74	1
Rad23a	0.00804377	0.0730558	0.62	0.569	1
Psmb1	0.00805467	0.0580737	0.993	0.992	1
Aqr	0.00806712	-0.0663425	0.426	0.499	1
Nsun2	0.00810546	0.0848172	0.494	0.45	1
Sart1	0.00815156	-0.0727562	0.432	0.49	1
Usp14	0.00818867	0.0982007	0.661	0.648	1
Dtymk	0.00819407	0.0810057	0.921	0.922	1
Rmnd5a	0.00822187	-0.0691609	0.316	0.375	1
Akna	0.00822619	-0.085342	0.642	0.707	1
Tex30	0.00825225	0.0759474	0.535	0.48	1
Rpl19	0.00825227	0.0319337	1	1	1
Agap3	0.0082536	-0.0221976	0.071	0.11	1
Safb2	0.00828341	-0.0764212	0.51	0.571	1
Timm9	0.0083025	0.072025	0.423	0.36	1
Mybbp1a	0.0083139	0.0680702	0.429	0.364	1
Tbcel	0.00833478	-0.0368892	0.177	0.234	1
Atp5l	0.00834502	0.0604975	0.999	0.994	1
Rpl12	0.00834781	-0.0514678	1	0.998	1
Nr1h2	0.00834842	-0.0554941	0.499	0.569	1
Mtg1	0.00838543	0.0494151	0.229	0.179	1
Sppl2a	0.00840389	-0.0694879	0.606	0.683	1
Prkd2	0.00841993	-0.0437642	0.178	0.234	1
Ppie	0.00848516	0.0864906	0.685	0.66	1
Ndufa6	0.00848821	-0.0920977	0.947	0.971	1
Ubqln2	0.00852057	-0.0454073	0.24	0.303	1
Ptpn22	0.00855561	-0.0949788	0.911	0.936	1
BC029722	0.00855982	0.0809467	0.412	0.37	1
Evl	0.00856914	-0.0763353	0.607	0.667	1
Dhrs4	0.00860272	0.0726698	0.379	0.33	1
Cyb5b	0.0086127	0.0879479	0.675	0.665	1
Stk4	0.00861519	-0.0861863	0.713	0.746	1
Stk24	0.00864701	-0.0943008	0.835	0.858	1
Rbm3	0.00865188	-0.0585365	0.998	1	1
Tigar	0.00865747	0.0383599	0.185	0.137	1
Hdac5	0.00867645	-0.0235741	0.068	0.107	1
Nsun6	0.00869937	-0.0312134	0.16	0.22	1
Hsd17b10	0.0087166	0.0877341	0.761	0.742	1
Platr25	0.00879275	-0.0401812	0.134	0.182	1
Ppm1d	0.00880815	-0.0359996	0.229	0.297	1
Sar1b	0.00885812	0.0985313	0.796	0.783	1
Dnajb14	0.00886326	-0.0321267	0.114	0.159	1
Ccdc186	0.00887216	-0.0450232	0.233	0.293	1
Nucb1	0.00888048	-0.0918386	0.889	0.925	1
Srsf6	0.00890426	0.0990122	0.836	0.829	1
Bin2	0.0089281	-0.100492	0.761	0.809	1
Hspa4l	0.00894924	-0.0814906	0.42	0.488	1
Psd4	0.00896353	-0.0523847	0.367	0.44	1
Gtf3c6	0.00900646	0.0716321	0.597	0.56	1
Hist1h2ag	0.00901948	-0.0617714	0.444	0.52	1
Cmtm7	0.00906228	0.0953292	0.976	0.979	1
Tfdp2	0.00912917	-0.0715442	0.314	0.37	1
Exosc8	0.00913072	0.0787443	0.947	0.931	1
Gbp2	0.00914318	-0.0349099	0.174	0.228	1
Gmfg	0.0091799	0.0997303	0.963	0.941	1
Npc2	0.0092335	-0.102414	0.914	0.941	1
Mtx2	0.00926283	0.067144	0.447	0.397	1
Trappc10	0.00928464	-0.0606281	0.396	0.467	1
Ect2	0.00930532	-0.0606444	0.369	0.44	1
Rfc4	0.00932307	0.0979686	0.859	0.842	1
Fam26f	0.00933778	-0.0708265	0.278	0.34	1
Ccser2	0.00938734	-0.0477303	0.268	0.34	1
Ubl3	0.00941025	-0.0576227	0.47	0.536	1
Pacs2	0.00942227	-0.0611486	0.146	0.193	1
Naca	0.00944257	0.0590357	1	0.998	1
Use1	0.00946483	-0.0798415	0.557	0.636	1
Tmem120a	0.00952547	0.0619449	0.256	0.206	1
Rap1a	0.00956436	0.0845258	0.986	0.986	1
Gtpbp2	0.00959455	-0.0892757	0.572	0.625	1
Mutyh	0.00963277	-0.0370073	0.129	0.177	1
Tmem109	0.00963705	0.0774494	0.532	0.467	1
Surf2	0.00965776	0.0731158	0.35	0.298	1
Hcfc1r1	0.00968314	-0.0560676	0.488	0.569	1
Med13	0.00968941	-0.061707	0.401	0.469	1
Lag3	0.0096994	-0.0751764	0.948	0.955	1
Snhg12	0.00970938	-0.0864805	0.587	0.641	1
Mrps11	0.00975305	0.0795357	0.621	0.595	1
Kif15	0.00976801	-0.0856824	0.867	0.896	1
Lclat1	0.00977063	-0.0509662	0.184	0.236	1
Tax1bp1	0.00983859	-0.0857527	0.854	0.892	1
Smc2	0.00986061	-0.0813129	0.98	0.989	1
Ndufb11	0.00987514	0.0557198	0.985	0.979	1
Prkacb	0.00988562	-0.0818661	0.569	0.63	1
Usp3	0.00992213	-0.0548677	0.452	0.531	1
Nfic	0.00993045	-0.061916	0.25	0.311	1
Vcp	0.00994607	0.0751334	0.823	0.82	1
Rdm1	0.00994794	-0.0741926	0.567	0.63	1
Cast	0.00995667	-0.0979327	0.75	0.788	1
Rpl7a	0.00997603	0.0544047	1	0.998	1
Pole3	0.00998233	0.079257	0.7	0.667	1
Bclaf1	0.010002	-0.0857889	0.822	0.869	1
Klhdc4	0.0100106	0.0861624	0.549	0.509	1
Stat2	0.0100137	-0.0491306	0.164	0.217	1
Cxcr6	0.0100348	0.105059	0.965	0.939	1
Tnfsf13b	0.0100414	-0.0378251	0.085	0.124	1
Ing2	0.0100481	-0.0635646	0.518	0.592	1
Rtn3	0.0100745	-0.0601677	0.851	0.922	1
Fcrl6	0.0100884	0.0873916	0.35	0.285	1
Ifi206	0.010142	-0.08507	0.159	0.209	1
Rmi2	0.0101611	-0.0434542	0.362	0.435	1
Lactb	0.0101664	0.0572111	0.271	0.219	1
2310011J03Rik	0.0101667	0.0710508	0.602	0.552	1
Cdc7	0.0101684	-0.0668114	0.423	0.486	1
Tctex1d2	0.0101971	0.103234	0.236	0.188	1
Usp47	0.0102055	-0.0747836	0.384	0.442	1
Atp11b	0.0102287	-0.0676924	0.763	0.809	1
Tbca	0.0102353	0.0640258	0.932	0.927	1
Aagab	0.0102391	-0.030737	0.166	0.22	1
Ndufa3	0.0102426	-0.0753332	0.913	0.944	1
Serpinb9	0.0102486	0.174073	0.639	0.608	1
Zdhhc6	0.0102549	0.0655733	0.344	0.292	1
Tnpo1	0.0103001	-0.062799	0.385	0.453	1
Rab27a	0.0103705	-0.0402069	0.477	0.56	1
Tmbim6	0.0103933	-0.0780341	0.957	0.979	1
Ppfibp1	0.0104238	-0.0273265	0.118	0.164	1
Lin54	0.0104412	-0.0681893	0.355	0.413	1
Cd9	0.0105269	-0.0661231	0.169	0.217	1
Abhd18	0.0105804	-0.0325214	0.095	0.137	1
S100pbp	0.0106203	-0.0381241	0.181	0.239	1
Zfp954	0.0106345	-0.0283134	0.089	0.129	1
Gatad2a	0.0107576	-0.068159	0.709	0.751	1
Scp2	0.0107593	0.074843	0.894	0.901	1
R3hdm2	0.0107917	-0.0725401	0.549	0.606	1
Dtnb	0.0108114	-0.038541	0.241	0.306	1
Ctdsp1	0.0108286	-0.0726726	0.361	0.421	1
Lsm2	0.0108294	0.0950115	0.95	0.935	1
Msmo1	0.0108382	0.0494236	0.234	0.185	1
Gadd45gip1	0.0108632	0.089738	0.571	0.531	1
Arl6ip4	0.0109046	0.0740214	0.768	0.75	1
Hdac3	0.0109127	-0.0546154	0.477	0.55	1
Syap1	0.0109309	-0.0530163	0.313	0.388	1
Dhrs7	0.0109459	0.0741127	0.615	0.581	1
Ddx5	0.0109492	-0.0507933	0.998	1	1
Zfp367	0.0110213	-0.065458	0.329	0.397	1
Blm	0.0110474	-0.0515063	0.429	0.509	1
Ftsj3	0.0110511	0.053591	0.398	0.344	1
Bbc3	0.0110708	-0.047318	0.118	0.163	1
Mapk8ip3	0.0110742	-0.0230968	0.179	0.239	1
Timm44	0.0110869	-0.056062	0.414	0.486	1
Klhl18	0.0111229	-0.0268267	0.082	0.121	1
Yme1l1	0.0111584	-0.0539813	0.644	0.707	1
Tmem59	0.011172	-0.0782915	0.782	0.833	1
Dnajb11	0.011186	0.074069	0.9	0.876	1
Calhm2	0.011191	-0.0359907	0.145	0.195	1
Zfp512	0.0112124	-0.0752959	0.222	0.279	1
Kpna4	0.0112189	-0.0715321	0.591	0.652	1
Psmd3	0.0112487	0.082327	0.664	0.632	1
Exosc4	0.0112572	0.0823498	0.635	0.625	1
Arpc5l	0.0112767	0.0811677	0.917	0.93	1
Tbrg4	0.0113128	0.0435823	0.181	0.136	1
Mrps28	0.0113707	0.0892137	0.519	0.482	1
Setd5	0.0113855	-0.0908299	0.565	0.627	1
Tmem70	0.0113933	0.0539061	0.443	0.394	1
Tfdp1	0.0114102	0.0947391	0.73	0.716	1
Cyth1	0.0114115	-0.0344089	0.109	0.152	1
Fbxl12	0.0114448	-0.0491728	0.216	0.276	1
Cd3eap	0.0114574	0.0517318	0.22	0.172	1
Htt	0.0114742	-0.0469037	0.334	0.405	1
Cep57l1	0.0114876	-0.0711443	0.364	0.431	1
Cox6c	0.0116115	0.0517462	0.998	0.997	1
Tnfrsf9	0.0116847	0.113359	0.958	0.936	1
Synrg	0.0117522	-0.0765243	0.371	0.437	1
Washc1	0.011758	0.0534959	0.315	0.263	1
Ipcef1	0.0117586	-0.0508918	0.277	0.335	1
Samd8	0.011795	-0.0266566	0.071	0.107	1
Trappc5	0.0117977	0.0664055	0.628	0.574	1
Prdx5	0.0118045	0.07943	0.922	0.936	1
Rps12	0.0118566	-0.0436363	1	1	1
Cirbp	0.0119301	-0.0910902	0.682	0.73	1
Klre1	0.0119352	-0.0887246	0.879	0.892	1
Mt2	0.0119571	0.105441	0.173	0.129	1
Arfip1	0.0119653	-0.0420178	0.184	0.239	1
Rrp1	0.0120137	0.0692457	0.804	0.809	1
Lpp	0.0121185	-0.0724418	0.215	0.266	1
Lsm3	0.0121306	0.0781206	0.928	0.927	1
Atrip	0.0121409	-0.0284404	0.156	0.209	1
Dck	0.0121501	-0.0538012	0.519	0.609	1
Clk4	0.0121745	-0.0483469	0.451	0.525	1
Cspp1	0.0122182	-0.0795973	0.407	0.467	1
Phf8	0.0122236	-0.0270882	0.209	0.271	1
Notch2	0.0122364	-0.0438471	0.106	0.148	1
Herpud1	0.0122374	-0.0733592	0.456	0.537	1
Kdm4a	0.0123229	-0.0355333	0.146	0.198	1
Pam16	0.012404	0.0715991	0.834	0.789	1
Rab5b	0.0124065	-0.0425173	0.181	0.234	1
Plagl2	0.0124503	-0.0400722	0.14	0.19	1
Ppp1r12a	0.0124798	-0.078541	0.687	0.754	1
Mctp2	0.0124833	-0.03772	0.267	0.329	1
Heg1	0.0124844	-0.0387178	0.089	0.128	1
Sik1	0.012507	-0.0474924	0.252	0.316	1
Mt1	0.0125486	0.254661	0.387	0.337	1
Senp5	0.0125503	-0.0424333	0.236	0.298	1
N4bp2l2	0.0125504	-0.0904619	0.725	0.778	1
Dock11	0.0125779	-0.0719538	0.556	0.63	1
Zc3h7a	0.0125876	-0.0801802	0.484	0.545	1
Cct5	0.0125878	0.0769111	0.959	0.954	1
Hist1h4k	0.0126041	-0.023673	0.072	0.108	1
Ppt2	0.0126263	0.0654657	0.297	0.247	1
Haus6	0.0126842	-0.0657367	0.369	0.439	1
Chd3	0.0126843	-0.0689728	0.425	0.491	1
Dmxl1	0.0127135	-0.0756337	0.336	0.397	1
Haspin	0.0127216	-0.0727527	0.403	0.458	1
1700025G04Rik	0.0128403	-0.0231122	0.084	0.124	1
Pmm2	0.0128715	0.0494744	0.317	0.257	1
Gm2000	0.0129423	-0.066985	0.756	0.818	1
Dpm2	0.0129525	0.0690199	0.579	0.539	1
Tdp2	0.0129833	-0.0570781	0.573	0.638	1
Dtd2	0.0129897	0.0499137	0.28	0.231	1
Hsd11b1	0.0129975	0.0657367	0.588	0.53	1
Sra1	0.0130293	0.0888384	0.845	0.829	1
Stil	0.013033	-0.0666126	0.257	0.306	1
Zbtb43	0.0130517	-0.0280348	0.11	0.153	1
Xndc1	0.0131046	-0.0329232	0.159	0.209	1
Wdr74	0.0131302	0.0607062	0.337	0.287	1
Gatad2b	0.0131411	-0.0561977	0.504	0.571	1
mt-Atp8	0.0131569	-0.061486	0.561	0.627	1
Phpt1	0.0132347	-0.0539465	0.263	0.321	1
Itgal	0.0132662	-0.0746479	0.829	0.871	1
Siva1	0.0132943	0.0812658	0.908	0.917	1
Dusp22	0.0133089	-0.04734	0.229	0.284	1
Psat1	0.0133252	0.0865067	0.74	0.716	1
Fxyd5	0.0133534	-0.0505007	1	1	1
Itga1	0.0133534	-0.087103	0.239	0.292	1
Haus5	0.0134235	-0.0420723	0.246	0.303	1
Ube2s	0.0134275	0.0749174	0.997	0.995	1
Eef2kmt	0.0134849	0.0391698	0.255	0.203	1
Pkp3	0.0135086	0.0765564	0.636	0.566	1
Mastl	0.0135695	-0.0406176	0.322	0.388	1
Cops6	0.0135811	0.0813591	0.875	0.863	1
Med10	0.0136188	0.0845	0.787	0.777	1
Plekha2	0.0136426	-0.0559998	0.475	0.549	1
Cep250	0.0137082	-0.048189	0.35	0.423	1
Rfx5	0.0137707	-0.0255896	0.07	0.105	1
Tox	0.0138316	-0.0857835	0.932	0.947	1
Sp3	0.0138323	-0.0698702	0.522	0.598	1
Gm16286	0.0138649	0.0589527	0.799	0.791	1
Zfp275	0.0138725	-0.0326988	0.078	0.115	1
Pygb	0.0139278	-0.0485331	0.213	0.266	1
Nfyb	0.0139336	-0.0672936	0.769	0.834	1
Phlda1	0.0139663	0.11765	0.543	0.507	1
Tmed3	0.0139719	0.0565718	0.708	0.67	1
Dopey1	0.0139865	-0.0414102	0.139	0.183	1
9530068E07Rik	0.0140117	-0.0520664	0.443	0.523	1
St6galnac3	0.0140804	-0.0362651	0.109	0.15	1
Rsl24d1	0.0140818	0.0532402	0.636	0.604	1
Galnt11	0.0140954	-0.0588968	0.28	0.346	1
Plcl2	0.0141076	-0.0513143	0.205	0.26	1
Cdc42	0.014127	0.0663168	1	0.995	1
Fip1l1	0.0141388	-0.0780105	0.787	0.825	1
Tfam	0.0141476	-0.0653629	0.525	0.59	1
Rnf114	0.0141694	-0.0801641	0.566	0.624	1
Xlr4c	0.0142163	0.05134	0.409	0.348	1
Pde3b	0.0142288	-0.0738133	0.46	0.542	1
Pds5b	0.0142585	-0.0652273	0.478	0.545	1
Fuca1	0.014271	-0.0530909	0.522	0.601	1
Prpf4b	0.0142815	-0.0741227	0.818	0.856	1
Taf12	0.0142866	0.0676525	0.754	0.711	1
Utp4	0.0142906	0.0480006	0.214	0.166	1
Zfp277	0.0143494	-0.0441259	0.278	0.337	1
Ifitm3	0.0143637	0.0427537	0.497	0.421	1
Pgam1	0.0143859	0.0518395	0.947	0.944	1
Hcst	0.0144928	-0.103231	0.976	0.987	1
Slc25a24	0.014513	-0.0505873	0.278	0.338	1
Rfx7	0.0145571	-0.061547	0.476	0.53	1
Tdp1	0.0145602	-0.0514138	0.302	0.359	1
Rrp9	0.0145677	0.056005	0.302	0.247	1
Usp50	0.0146207	0.0517408	0.486	0.431	1
Crebbp	0.014684	-0.0525371	0.467	0.53	1
Zfand3	0.0147046	-0.0518888	0.29	0.356	1
Ndufa12	0.0147211	0.0817909	0.924	0.931	1
Shisa5	0.0147566	-0.0868358	0.989	0.995	1
Rnh1	0.0147587	0.08185	0.85	0.836	1
Kif1c	0.0148541	-0.0336248	0.136	0.18	1
Cxcl10	0.0148581	-0.0706332	0.079	0.115	1
E130307A14Rik	0.0149116	-0.0305371	0.087	0.126	1
Slc33a1	0.0150162	-0.0341958	0.12	0.164	1
Ap1b1	0.0151437	-0.039628	0.196	0.255	1
Mrps6	0.015171	0.0549682	0.688	0.656	1
Slamf7	0.0151758	-0.0546371	0.141	0.187	1
Prickle3	0.0152043	-0.0320708	0.1	0.142	1
Spata6	0.0152277	-0.0463823	0.17	0.219	1
Npc1	0.0153494	-0.0301598	0.1	0.142	1
Psmg3	0.0154147	0.0752163	0.469	0.426	1
Mpv17l2	0.0154321	0.0784829	0.453	0.418	1
Micu2	0.0154414	-0.0665566	0.487	0.561	1
Psme2b	0.0154514	-0.0308093	0.109	0.152	1
Bmpr2	0.0154539	-0.0485382	0.12	0.161	1
Bst2	0.0154776	0.0477002	0.757	0.734	1
Sik2	0.0154907	-0.0337	0.142	0.19	1
Actl6a	0.0155061	0.0754675	0.808	0.81	1
Cdk2ap2	0.0155573	-0.0805219	0.863	0.895	1
Gtf3c2	0.0156259	-0.0512764	0.374	0.439	1
Cotl1	0.0156536	0.072004	0.966	0.949	1
Il4ra	0.0156564	-0.0280175	0.071	0.105	1
Il16	0.0156628	-0.0664922	0.33	0.389	1
Ube2g1	0.0157624	-0.0588805	0.417	0.494	1
Cfap97	0.0157706	-0.0547629	0.306	0.368	1
0610009O20Rik	0.0158292	-0.0467279	0.269	0.333	1
Rrp15	0.0158435	0.069436	0.33	0.282	1
Zmym5	0.0158689	-0.039207	0.253	0.319	1
2700049A03Rik	0.015965	-0.0489191	0.181	0.231	1
Pfkfb3	0.0159675	-0.0441372	0.113	0.153	1
Ucp2	0.0159821	0.0784263	0.969	0.971	1
Ankrd44	0.0160076	-0.0633268	0.688	0.769	1
Mast2	0.0160259	-0.0473635	0.199	0.249	1
Rhoa	0.0160306	-0.0635079	0.995	0.995	1
Zfp748	0.0160434	-0.027042	0.081	0.118	1
Pnkd	0.0161229	0.0826925	0.701	0.683	1
Cdca3	0.0161336	-0.0797678	0.823	0.853	1
Trmt2a	0.0161713	-0.0449177	0.214	0.265	1
Dhps	0.0161749	0.068935	0.621	0.582	1
Scyl2	0.0161874	-0.031468	0.219	0.278	1
Crebrf	0.0163311	-0.0577866	0.209	0.265	1
Dennd1b	0.016363	-0.0607209	0.577	0.628	1
Cnbp	0.0164043	0.0820279	0.989	0.989	1
Rfwd3	0.0164423	-0.0667757	0.451	0.52	1
Gtf2e2	0.0165178	0.0703207	0.629	0.604	1
Kat7	0.0165483	-0.0434512	0.397	0.478	1
Bloc1s4	0.0165489	0.0586352	0.408	0.356	1
Usf3	0.0165528	-0.040459	0.224	0.281	1
Wbp11	0.0166113	-0.0673342	0.643	0.711	1
Pmvk	0.0166277	0.0705206	0.475	0.431	1
Ubn1	0.0166322	-0.07494	0.739	0.772	1
Bcl10	0.0166774	-0.0869464	0.624	0.681	1
Dnttip2	0.0167373	-0.072928	0.58	0.627	1
Zfp444	0.0167643	-0.0342264	0.156	0.203	1
Zfp41	0.0167786	-0.0316779	0.178	0.228	1
Ptger4	0.0168608	-0.0534037	0.18	0.23	1
Osbpl3	0.016902	-0.0765488	0.599	0.651	1
Polr2l	0.016935	0.0714293	0.438	0.392	1
Acsl5	0.0169391	0.0615921	0.717	0.687	1
Bsg	0.0169989	0.0666223	0.958	0.949	1
Gm33104	0.0170115	-0.0329103	0.133	0.177	1
Tvp23b	0.017013	0.0474849	0.297	0.247	1
Ip6k1	0.0170327	-0.0431255	0.214	0.266	1
Tbl2	0.0170497	-0.0376794	0.126	0.171	1
Zfp644	0.0170639	-0.0933617	0.641	0.703	1
Fam160b2	0.0170733	-0.0151722	0.091	0.131	1
Slc45a4	0.017082	-0.0162392	0.096	0.137	1
Gpr68	0.0170985	-0.0609465	0.315	0.375	1
Vcpip1	0.0171285	-0.0469744	0.257	0.314	1
Pop1	0.017147	0.037758	0.121	0.085	1
Zmym2	0.0171658	-0.0223313	0.112	0.155	1
Tpp1	0.0172901	-0.0387975	0.227	0.289	1
Arf1	0.0173367	0.0729247	0.967	0.962	1
Ctsa	0.0173618	0.0805689	0.673	0.643	1
Noc2l	0.0173726	0.0775676	0.437	0.396	1
Ppp2r5a	0.0173915	-0.0676465	0.633	0.691	1
Enpp4	0.0174019	-0.0138284	0.066	0.102	1
Zbtb20	0.0174551	-0.0554528	0.238	0.295	1
Rdx	0.0174594	-0.0873057	0.868	0.86	1
Sec61g	0.0174832	-0.0508754	0.995	0.992	1
Ccdc127	0.017484	-0.04146	0.399	0.478	1
Alyref	0.0175054	0.0850953	0.966	0.968	1
Herc4	0.0175313	-0.0450792	0.292	0.359	1
Rpp40	0.0175492	0.0301168	0.106	0.072	1
Comt	0.017568	0.0909258	0.546	0.506	1
Emsy	0.0175892	-0.0350109	0.455	0.536	1
Arf4	0.017598	-0.0799579	0.937	0.947	1
Rpl41	0.0176096	-0.0553496	1	1	1
Raf1	0.0176325	-0.0546119	0.349	0.413	1
mt-Nd1	0.0176636	-0.0709891	0.999	0.998	1
Nlrc3	0.0176798	-0.0611904	0.334	0.391	1
Cit	0.0177034	-0.08543	0.683	0.735	1
Fis1	0.0177846	0.0842892	0.976	0.971	1
Wdr61	0.0178408	0.0717587	0.587	0.56	1
Ccdc28a	0.017859	-0.0397292	0.22	0.278	1
Cbl	0.0178941	-0.0628735	0.531	0.585	1
Zscan26	0.0179203	-0.0365013	0.14	0.188	1
Ncapd3	0.0179418	-0.0676626	0.836	0.879	1
Brix1	0.0179445	0.0735815	0.589	0.558	1
Rab39b	0.0179665	-0.0160371	0.075	0.112	1
H2-K1	0.0179879	-0.0589525	1	1	1
Rabep2	0.0180092	-0.0435579	0.237	0.29	1
Ube2l3	0.0180227	0.0635923	0.972	0.979	1
Ncf1	0.0180243	-0.0299676	0.086	0.124	1
Rpsa	0.0180677	0.037362	1	1	1
Ankrd17	0.018104	-0.048558	0.627	0.707	1
D10Wsu102e	0.0181055	-0.0723162	0.36	0.427	1
2010107E04Rik	0.01815	-0.0641197	0.975	0.982	1
Spr	0.0181514	0.0528139	0.264	0.222	1
Chd6	0.0181599	-0.0595672	0.339	0.396	1
Usp9x	0.0181789	-0.0409719	0.405	0.472	1
Hook3	0.018239	-0.0769413	0.466	0.53	1
Actn1	0.018269	-0.0313229	0.153	0.206	1
Rce1	0.0183707	0.0454511	0.362	0.308	1
Tmem243	0.0183758	-0.0539408	0.425	0.498	1
Ap2b1	0.0184031	-0.0788358	0.571	0.64	1
Zfp938	0.0184884	-0.0335156	0.139	0.185	1
Coq8b	0.0185345	-0.0229808	0.078	0.113	1
Epc2	0.0185375	-0.045897	0.356	0.427	1
Trgv2	0.0185616	-0.154358	0.336	0.378	1
Eif4e	0.0185672	0.0821554	0.797	0.77	1
Tmem147	0.018571	0.0715955	0.623	0.585	1
Ube2l6	0.0186149	-0.0378737	0.208	0.26	1
Tapt1	0.0187207	-0.0320942	0.138	0.183	1
Creld2	0.0188832	0.0827891	0.625	0.627	1
Haus8	0.0188986	-0.0364085	0.293	0.359	1
Pde7a	0.0189856	-0.0608713	0.398	0.466	1
Traf1	0.0190341	-0.0750477	0.706	0.777	1
H2-Q10	0.0190905	-0.0656214	0.314	0.37	1
Bcap29	0.0191388	0.0712441	0.718	0.675	1
Nfkbib	0.019147	0.0817456	0.57	0.549	1
Mbd3	0.0191472	0.0798544	0.777	0.775	1
Srp19	0.0191712	0.0594645	0.924	0.904	1
Zfp36l1	0.0192364	-0.100833	0.6	0.652	1
Fam76b	0.0192655	-0.0708166	0.545	0.611	1
Lig1	0.0193259	-0.085366	0.896	0.927	1
Stag1	0.019346	-0.0625216	0.669	0.751	1
Setx	0.0194171	-0.100406	0.518	0.574	1
Filip1l	0.0194459	-0.0795188	0.274	0.325	1
Prelid3b	0.0195492	0.0665624	0.776	0.735	1
Ankrd12	0.0195617	-0.101349	0.745	0.761	1
Trappc6a	0.0195986	0.0882128	0.808	0.793	1
Flot2	0.0196168	-0.0445555	0.274	0.333	1
Rbck1	0.0196819	0.0551682	0.736	0.721	1
Kpnb1	0.019697	-0.0633535	0.646	0.703	1
Adam10	0.0197478	-0.0484318	0.579	0.663	1
Ube2n	0.0197499	0.083523	0.859	0.823	1
Pxylp1	0.0197835	-0.0249258	0.067	0.1	1
Sfxn3	0.0198554	-0.0226383	0.107	0.15	1
Xpo1	0.0198762	-0.0740676	0.665	0.7	1
2022-03-07	0.0198962	-0.0475333	0.514	0.584	1
Ugcg	0.0199548	-0.106208	0.926	0.954	1
Pafah1b3	0.019991	-0.0363053	0.317	0.381	1
Tubgcp3	0.0200125	-0.0432193	0.236	0.29	1
Nadk	0.0201523	0.0676501	0.338	0.295	1
Tap1	0.0201765	-0.0633271	0.953	0.962	1
Prrc2c	0.0202595	-0.0742938	0.928	0.97	1
Il12rb2	0.020309	-0.035323	0.282	0.343	1
Cd68	0.0203554	-0.017956	0.077	0.113	1
Usp25	0.0203744	-0.088867	0.682	0.754	1
Abt1	0.0203893	0.0520275	0.417	0.367	1
D830025C05Rik	0.0204277	-0.0216215	0.075	0.11	1
Mindy2	0.0204711	-0.0560713	0.435	0.499	1
Arrdc1	0.0204991	-0.0412016	0.499	0.566	1
Gimap8	0.0205043	-0.0845355	0.532	0.601	1
Ten1	0.0205423	0.0474954	0.529	0.496	1
Spop	0.0206056	-0.0443355	0.573	0.64	1
Sbds	0.0206058	-0.0429435	0.466	0.539	1
Anxa5	0.020609	0.0924027	0.665	0.649	1
Psmd2	0.0206849	0.0733581	0.771	0.751	1
Rbl2	0.020713	-0.0701874	0.731	0.754	1
Mrpl44	0.0207778	0.0590217	0.34	0.293	1
Ppp1r15a	0.0208002	-0.0823155	0.582	0.638	1
Rab3gap2	0.0208092	-0.0212095	0.111	0.153	1
Macf1	0.0208407	-0.0909279	0.746	0.796	1
Tjp2	0.0208782	-0.0298862	0.1	0.139	1
Anapc15	0.0209784	0.0564189	0.713	0.678	1
Qsox1	0.0209971	-0.0385328	0.203	0.255	1
B4galt1	0.0210065	-0.057433	0.434	0.493	1
Ttf2	0.0211331	-0.0606753	0.385	0.448	1
Rbm5	0.0211713	-0.0841664	0.621	0.676	1
Tmed10	0.0211779	0.0693345	0.868	0.877	1
Cdca2	0.0212625	-0.0675451	0.567	0.622	1
Lasp1	0.0212734	-0.0611217	0.571	0.62	1
BC030867	0.0213178	0.0354711	0.13	0.093	1
2022-09-01	0.0213584	0.0785661	0.965	0.955	1
Epc1	0.0214326	-0.0486321	0.29	0.348	1
1110008P14Rik	0.0214743	0.0766149	0.596	0.558	1
Ints12	0.0215746	-0.0359767	0.199	0.25	1
Brip1os	0.0215816	-0.0543702	0.353	0.41	1
Eif3h	0.021677	0.046776	0.997	0.995	1
Bard1	0.0216992	-0.080637	0.505	0.561	1
Gsto1	0.0218605	0.0668713	0.281	0.239	1
Hcfc1	0.0218743	-0.0458627	0.501	0.582	1
Mlf2	0.0219718	0.0620602	0.729	0.705	1
Inpp5k	0.0219859	-0.0431147	0.379	0.443	1
Rnf213	0.0220142	-0.0822623	0.358	0.415	1
Bzw2	0.0220262	0.0733039	0.545	0.486	1
Kmt5a	0.0220365	-0.0739357	0.782	0.81	1
Dot1l	0.0220428	-0.025204	0.301	0.368	1
Fam193a	0.0221381	-0.0529707	0.327	0.386	1
Gimap1	0.0221956	-0.0568602	0.975	0.981	1
Ctdspl2	0.0221969	-0.0604765	0.554	0.63	1
Zfp386	0.0222423	-0.0323364	0.143	0.187	1
Comtd1	0.0223216	0.0426271	0.244	0.196	1
Cnot1	0.0223736	-0.0524229	0.58	0.659	1
Ndufaf4	0.0223943	0.0765534	0.401	0.359	1
Stmn1	0.0223969	-0.0544082	0.963	0.982	1
Zfp706	0.0224814	0.0716832	0.898	0.9	1
Rbm15b	0.0225055	-0.0450274	0.208	0.258	1
Zfp787	0.0225058	-0.0329717	0.278	0.338	1
Wapl	0.0225494	-0.0806898	0.734	0.785	1
Eci1	0.0225972	0.0922753	0.51	0.472	1
Mrpl37	0.0226056	0.0465405	0.237	0.195	1
Fam102b	0.0226774	-0.0130798	0.092	0.129	1
Eme1	0.0226816	-0.0451741	0.288	0.348	1
Papss1	0.0226979	0.0437007	0.215	0.172	1
Trmt13	0.0227376	-0.0420704	0.177	0.225	1
Evi2	0.0227583	-0.0403031	0.212	0.265	1
Mgea5	0.0228292	-0.063231	0.436	0.498	1
Atxn7l3	0.022893	-0.0450898	0.287	0.344	1
Nop10	0.0229307	0.0669228	0.915	0.914	1
Ppwd1	0.022942	-0.090314	0.605	0.668	1
Rbm8a	0.0230374	0.0681119	0.941	0.928	1
Timm10	0.0230638	0.0625411	0.391	0.351	1
Ccny	0.0231286	-0.0563616	0.312	0.372	1
Tgfb1	0.0231503	-0.0474127	0.751	0.794	1
Tnrc6a	0.0231783	-0.0486157	0.561	0.633	1
Tram1	0.0232074	-0.0628566	0.796	0.845	1
Chd2	0.0232406	-0.102957	0.818	0.847	1
Alg5	0.0232526	0.0625873	0.661	0.638	1
Tmem159	0.0232962	-0.0348433	0.136	0.18	1
Prkcb	0.0233204	-0.0339545	0.275	0.338	1
Retreg2	0.0233447	-0.0471699	0.396	0.463	1
Plekhj1	0.0233843	0.0795056	0.843	0.842	1
Brca2	0.0233843	-0.0733161	0.436	0.49	1
Mbp	0.0233915	-0.0518394	0.243	0.289	1
Hsf2	0.0234057	-0.0349615	0.097	0.132	1
Casp4	0.0234269	-0.0535916	0.178	0.226	1
Cdc25a	0.0234354	-0.0451798	0.316	0.376	1
Zfp655	0.0234531	-0.0392083	0.184	0.231	1
Galk1	0.0235365	0.0907367	0.602	0.557	1
Kntc1	0.0235705	-0.0542068	0.248	0.301	1
Kif1bp	0.0237322	-0.0450745	0.168	0.214	1
Snf8	0.0237476	0.0585765	0.851	0.842	1
Gtf2b	0.0238154	0.0492656	0.758	0.735	1
Iqgap3	0.0238531	-0.0280177	0.085	0.121	1
Pkig	0.0238563	0.0507862	0.152	0.116	1
Sufu	0.0238713	-0.0425178	0.072	0.104	1
Wls	0.0239018	-0.0726907	0.308	0.368	1
Slc25a25	0.0239704	-0.0385837	0.124	0.164	1
Hnrnpu	0.0240915	-0.0710602	0.988	0.99	1
Ndufb3	0.0240986	0.0713925	0.933	0.909	1
Vmp1	0.0241466	0.0688421	0.884	0.871	1
Pak2	0.0241825	-0.0696958	0.933	0.939	1
Srsf2	0.0242123	0.0624908	0.992	0.994	1
BC005624	0.0242812	-0.0725419	0.649	0.705	1
Abcg1	0.0244015	-0.0284703	0.278	0.338	1
Naxd	0.0244486	0.0611754	0.503	0.443	1
Manbal	0.0244795	0.0539956	0.357	0.317	1
Ttc33	0.0244894	0.0664657	0.34	0.298	1
Socs3	0.024515	-0.0317561	0.083	0.118	1
Lnpk	0.024582	-0.0639236	0.448	0.514	1
Mphosph9	0.0245959	-0.0601117	0.33	0.389	1
Mier1	0.0246037	-0.078141	0.83	0.868	1
Kif20a	0.0246127	-0.0337311	0.383	0.451	1
Hip1r	0.0246129	-0.0322294	0.348	0.41	1
Lppos	0.0246308	-0.0250964	0.264	0.321	1
Chchd7	0.0246609	0.0778228	0.524	0.483	1
Vapa	0.0246624	0.0651296	0.821	0.825	1
Mmgt2	0.0246745	0.0540282	0.377	0.33	1
Scaper	0.0247673	-0.0444016	0.183	0.23	1
Gosr1	0.0247934	-0.0551123	0.339	0.394	1
Znhit6	0.0248058	0.0572447	0.347	0.301	1
Smyd4	0.0248105	-0.0414933	0.153	0.198	1
Rpl10a	0.0248313	0.0452399	1	0.998	1
C730034F03Rik	0.0248367	-0.0448255	0.129	0.169	1
Nudt2	0.0249925	0.0663417	0.415	0.381	1
Pdrg1	0.0251163	0.0644766	0.6	0.571	1
Poldip3	0.0251235	-0.0593156	0.445	0.493	1
Smg6	0.0251528	-0.0615091	0.57	0.643	1
Cish	0.025162	-0.0400572	0.27	0.321	1
Scaf11	0.0251645	-0.052657	0.82	0.864	1
Cdc37l1	0.0252944	-0.0383672	0.44	0.514	1
Gm26699	0.025337	-0.050366	0.447	0.515	1
Pdk3	0.0253668	0.0597112	0.403	0.368	1
Pdcd5	0.0254505	0.078488	0.961	0.951	1
Psmb9	0.0254527	0.0616144	0.999	0.998	1
Mtdh	0.0254532	0.0622259	0.922	0.906	1
Cops2	0.0255575	-0.0482718	0.613	0.668	1
Kdm2b	0.0255734	-0.0415403	0.367	0.434	1
Pip5k1a	0.0255836	-0.0450382	0.303	0.364	1
Rbbp5	0.0256567	-0.0332782	0.171	0.223	1
Kif11	0.0257816	-0.062206	0.798	0.817	1
Pacsin2	0.0257907	-0.0442309	0.337	0.397	1
Arih2	0.0258402	-0.0592292	0.316	0.37	1
Zfp24	0.0258428	-0.0569799	0.228	0.273	1
Xrcc4	0.0258794	-0.0419888	0.208	0.262	1
Cep72	0.025908	-0.0154424	0.12	0.163	1
Phtf1	0.0259565	-0.0629675	0.316	0.373	1
Dnajb9	0.0259597	-0.0339343	0.119	0.159	1
Mta2	0.0260357	-0.0470471	0.516	0.596	1
Bola1	0.0261237	0.0494433	0.338	0.287	1
Entpd7	0.0261466	-0.0319087	0.094	0.129	1
Gm7324	0.0261552	-0.0337135	0.18	0.231	1
Lmtk2	0.0262028	-0.0279182	0.106	0.144	1
Cnih1	0.0262681	0.0907129	0.686	0.678	1
Ublcp1	0.0264581	-0.0262275	0.141	0.185	1
Sos2	0.0265673	-0.0373457	0.191	0.239	1
Dtnbp1	0.0265988	0.0573712	0.649	0.601	1
Polr2h	0.0266572	0.0571237	0.588	0.539	1
Tbk1	0.0267743	-0.0556483	0.425	0.493	1
Riox2	0.0267932	0.0630011	0.401	0.36	1
Ebpl	0.0268078	0.0569431	0.558	0.523	1
Fgd3	0.0268453	-0.0258439	0.091	0.126	1
Rab5c	0.0268607	-0.0588275	0.751	0.793	1
Anapc13	0.0268636	-0.046269	0.691	0.754	1
Dubr	0.0268799	-0.0419051	0.203	0.25	1
Akt2	0.0269167	-0.0529119	0.46	0.522	1
Sclt1	0.0269174	-0.0512705	0.328	0.376	1
Tnik	0.0269635	-0.0389345	0.215	0.268	1
Mdm4	0.0269674	-0.0599936	0.584	0.64	1
Gm3839	0.0269677	-0.0331662	0.289	0.351	1
Mcm3	0.0270107	-0.0829278	0.779	0.826	1
Adrm1	0.0270611	0.0692616	0.568	0.544	1
Ar	0.0270931	-0.0653543	0.143	0.182	1
Twsg1	0.0271765	-0.0568914	0.518	0.581	1
Rps9	0.0271774	0.0335548	1	1	1
Parp10	0.0271799	-0.0420112	0.184	0.231	1
Oas1c	0.0272113	-0.0196773	0.106	0.145	1
Gabbr1	0.0272494	-0.0326406	0.115	0.155	1
Pja2	0.0272695	-0.023087	0.142	0.188	1
Herc3	0.0273047	-0.043389	0.261	0.316	1
Mkl2	0.0273164	-0.0199344	0.089	0.124	1
Agtpbp1	0.0273492	-0.0499853	0.296	0.362	1
Map1lc3a	0.0274478	-0.0344259	0.251	0.309	1
Mob1a	0.0275204	-0.084668	0.698	0.748	1
Cdc42se2	0.0275367	-0.0402787	0.492	0.56	1
Mrps15	0.0276301	0.0836112	0.767	0.767	1
Dhx38	0.0276467	-0.0411344	0.255	0.308	1
Cenpn	0.0277394	-0.0336633	0.351	0.415	1
Hcls1	0.0278216	0.0735222	0.831	0.826	1
Elof1	0.0278393	0.070109	0.879	0.855	1
Pfdn6	0.0278414	0.0728948	0.834	0.821	1
Scyl3	0.0278847	-0.0179289	0.128	0.172	1
Nfu1	0.0279483	0.0716414	0.478	0.439	1
Mapk8	0.0279536	-0.0221645	0.091	0.128	1
Sgpl1	0.0279687	-0.0477051	0.165	0.211	1
Clns1a	0.0279815	0.0746951	0.671	0.66	1
Gramd3	0.0279945	-0.0597043	0.16	0.201	1
Slc9a3r1	0.0280075	-0.0484611	0.641	0.71	1
Hsbp1	0.0280725	0.067607	0.856	0.866	1
Nr4a1	0.0280926	-0.0294518	0.126	0.167	1
Fam193b	0.0281036	-0.0329966	0.192	0.242	1
Cysltr2	0.0281176	-0.054104	0.253	0.303	1
Yy1	0.0281274	-0.0606864	0.805	0.848	1
Flna	0.0281651	-0.0680711	0.577	0.63	1
Rnf25	0.028182	-0.0266672	0.07	0.1	1
Zfc3h1	0.0282091	-0.0529387	0.293	0.349	1
Sap30	0.0282273	-0.0514091	0.439	0.496	1
Mrrf	0.0282808	0.0511646	0.219	0.18	1
Cyb5a	0.0282995	0.0589183	0.767	0.769	1
Cyfip2	0.0283453	-0.0655933	0.727	0.767	1
Rpl26	0.0283511	-0.0374865	1	0.998	1
Ppp1r12c	0.0283617	-0.0285837	0.339	0.411	1
Chchd10	0.0283979	0.0474095	0.625	0.579	1
Ano6	0.0284231	-0.0432278	0.179	0.223	1
Cox6b1	0.0284573	0.0539487	0.997	0.995	1
Med28	0.0284596	0.0836796	0.832	0.825	1
Rack1	0.0284696	-0.0428485	1	1	1
Pan3	0.0284832	-0.0437407	0.344	0.4	1
Ufc1	0.0285917	0.0728855	0.831	0.829	1
Lamp1	0.0285973	-0.0533536	0.628	0.715	1
Adh5	0.0286113	0.0757031	0.805	0.797	1
Prkd3	0.0286161	-0.038146	0.211	0.263	1
Fam177a	0.0286204	-0.0256452	0.071	0.102	1
Rabgap1	0.0286288	-0.0469299	0.176	0.217	1
Cyba	0.0286914	0.0714427	0.997	0.995	1
Cd200	0.0287647	0.0782031	0.469	0.434	1
Mrps18a	0.0288366	0.0599086	0.62	0.577	1
Arid4b	0.0289002	-0.0706648	0.581	0.63	1
Mlxip	0.028905	-0.0330225	0.163	0.209	1
Pcbp4	0.0289345	-0.0373135	0.171	0.215	1
Carm1	0.0289807	-0.0278134	0.133	0.174	1
Wiz	0.0290055	0.0247074	0.114	0.08	1
Zer1	0.0291086	-0.0289944	0.181	0.23	1
Rock2	0.0291499	-0.0783206	0.573	0.63	1
Kdelr2	0.0291758	0.071279	0.841	0.847	1
Gpatch4	0.0292338	0.0802997	0.32	0.278	1
Naa60	0.0293305	-0.0384035	0.195	0.241	1
Wac	0.0293678	-0.0619361	0.708	0.74	1
Bhlhe40	0.029408	-0.0626299	0.702	0.756	1
Hnrnpul1	0.0294095	-0.090086	0.77	0.823	1
Cbx5	0.0294097	-0.0604305	0.836	0.909	1
Eef1akmt4	0.0294112	0.0399844	0.12	0.089	1
Slc25a51	0.0295147	0.0670748	0.32	0.282	1
Timeless	0.0295471	-0.0274537	0.36	0.432	1
Gbf1	0.0295867	-0.0256996	0.309	0.368	1
Prdm2	0.0296911	-0.0642275	0.263	0.313	1
Zfp322a	0.0296921	-0.0488403	0.215	0.262	1
Mapk3	0.0297253	-0.0457787	0.619	0.675	1
Kdm5a	0.029771	-0.0748187	0.499	0.568	1
Aimp2	0.0297774	0.0689402	0.477	0.437	1
Pdcd1	0.0298079	0.0813944	0.97	0.968	1
Dopey2	0.0299089	-0.0436427	0.136	0.174	1
Ehmt1	0.0299287	-0.0568154	0.336	0.391	1
Cdk2ap1	0.0299997	0.0825787	0.866	0.842	1
Papd4	0.0300037	-0.0354537	0.369	0.435	1
Ercc5	0.0300626	-0.0388201	0.123	0.161	1
Mlec	0.0300781	0.0763965	0.849	0.821	1
Aplf	0.0300857	-0.0245897	0.073	0.104	1
E2f4	0.0301922	0.0644148	0.665	0.614	1
Rpia	0.0302522	-0.0572563	0.609	0.687	1
Nde1	0.030264	-0.0782802	0.565	0.611	1
Fyn	0.0303073	-0.102805	0.737	0.778	1
Piezo1	0.0303384	-0.0192452	0.093	0.129	1
Wdr1	0.0304311	0.0786155	0.917	0.914	1
Osbpl9	0.0305237	-0.0314973	0.301	0.362	1
Prkca	0.0305984	-0.0460982	0.396	0.464	1
Dym	0.0306764	-0.0337977	0.118	0.158	1
Mpc2	0.0306966	0.0584988	0.791	0.769	1
Carnmt1	0.0307471	0.0556573	0.595	0.568	1
Tnfaip1	0.0307626	0.0396497	0.166	0.129	1
Aspm	0.0308494	-0.109287	0.568	0.611	1
Lgalsl	0.0308561	0.0628189	0.316	0.278	1
Ppp1r35	0.0308637	0.0571406	0.722	0.692	1
Klhl28	0.030917	-0.0443628	0.232	0.278	1
Ell	0.0309267	-0.0401288	0.131	0.169	1
Ap4m1	0.0309934	-0.0395431	0.197	0.244	1
Ttyh3	0.0309936	-0.0142898	0.12	0.161	1
Copg2	0.030999	-0.0329855	0.247	0.295	1
Depdc5	0.0310257	-0.0334177	0.155	0.201	1
Lysmd3	0.0310351	-0.0515689	0.154	0.195	1
Jund	0.0310676	-0.0568457	0.997	0.998	1
Msl2	0.0311045	-0.0405907	0.277	0.327	1
[truncated: 6,014 more rows]

## Sheet: Cluster 6
	p_val	avg_log2FC	pct_high	pct.2_low	p_val_adj
Fcer1g	1.07858e-33	2.28301	0.374	0.066	1.26161e-29
Rps29	8.56236e-22	-0.35035	0.994	0.995	1.00154e-17
Gm42418	3.67819e-21	-0.551244	1	0.997	4.30238e-17
S100a11	3.09107e-20	0.681433	0.915	0.864	3.61562e-16
Havcr2	4.53493e-20	0.75011	0.315	0.078	5.30451e-16
Rps27rt	6.87447e-20	-0.591528	0.929	0.951	8.04106e-16
Lat2	4.80056e-18	0.516869	0.353	0.115	5.61522e-14
Rps21	1.72397e-17	-0.332784	0.997	0.995	2.01653e-13
Irf8	2.26117e-17	0.777246	0.441	0.186	2.6449e-13
S100a4	1.71694e-16	0.760962	0.882	0.791	2.00831e-12
Napsa	1.79964e-16	0.456198	0.238	0.054	2.10504e-12
Klra3	1.81927e-16	1.07049	0.209	0.04	2.128e-12
Entpd1	1.00462e-15	0.600498	0.391	0.159	1.1751e-11
Spp1	1.00774e-15	1.13629	0.353	0.134	1.17876e-11
Rps27	1.02194e-15	-0.315912	0.997	0.998	1.19536e-11
Prf1	6.56574e-15	1.12455	0.591	0.392	7.67994e-11
Rgs16	1.871e-14	0.581307	0.338	0.124	2.18851e-10
Klre1	2.46835e-14	0.561105	0.429	0.193	2.88722e-10
Cd244	5.38865e-14	0.397947	0.229	0.061	6.3031e-10
Rps28	1.49681e-13	-0.313371	0.985	0.972	1.75081e-09
Pglyrp1	2.63659e-13	0.719521	0.582	0.408	3.08402e-09
Tyrobp	2.84041e-13	1.50499	0.106	0.005	3.32243e-09
Rpl6	7.72845e-13	-0.262719	0.997	0.99	9.03997e-09
Ccnd2	9.01677e-13	-0.598152	0.65	0.812	1.05469e-08
AW112010	1.00322e-12	0.584874	0.976	0.969	1.17347e-08
Slco3a1	1.54361e-12	-0.58385	0.162	0.385	1.80556e-08
Tmsb4x	2.79757e-12	0.276734	0.997	1	3.27232e-08
Rpl37	4.88118e-12	-0.243142	0.997	0.993	5.70952e-08
Ugcg	8.85786e-12	0.685018	0.653	0.524	1.0361e-07
Lgals3	2.03602e-11	0.646047	0.791	0.681	2.38153e-07
Bcl2a1d	2.08306e-11	0.678742	0.541	0.357	2.43656e-07
Csf1	2.10533e-11	0.456127	0.285	0.111	2.46261e-07
Ifng	2.83254e-11	1.51721	0.624	0.448	3.31322e-07
2900026A02Rik	2.93136e-11	0.237052	0.153	0.031	3.42882e-07
Srgap3	3.11378e-11	0.252031	0.218	0.064	3.64218e-07
Lag3	3.58111e-11	0.603009	0.503	0.294	4.18883e-07
Adam8	3.74747e-11	0.288009	0.241	0.08	4.38341e-07
Gramd3	7.92763e-11	-0.499074	0.294	0.521	9.27294e-07
Ctsd	9.96076e-11	0.605825	0.824	0.772	1.16511e-06
Rpl38	1.84388e-10	-0.230181	1	0.988	2.15679e-06
Plek	1.86054e-10	0.562472	0.35	0.172	2.17628e-06
Trim30c	2.5867e-10	-0.593107	0	0.11	3.02566e-06
Rpl35a	4.8793e-10	-0.215617	0.997	0.993	5.70732e-06
Filip1	6.22042e-10	0.27038	0.124	0.023	7.27603e-06
Arsb	7.51815e-10	0.393788	0.329	0.157	8.79398e-06
Gem	1.00107e-09	0.594559	0.368	0.193	1.17096e-05
2022-09-11	1.02403e-09	0.479614	0.421	0.247	1.19781e-05
Tox	1.10985e-09	0.512168	0.415	0.24	1.29819e-05
Nrgn	1.41696e-09	0.586363	0.253	0.103	1.65741e-05
Edf1	1.62063e-09	0.330163	0.862	0.786	1.89566e-05
Rps16	1.75861e-09	-0.184656	1	0.991	2.05705e-05
Bcl2a1b	1.8686e-09	0.664563	0.618	0.5	2.1857e-05
Cd3g	2.10865e-09	0.48821	0.953	0.977	2.46649e-05
Itgav	2.25042e-09	0.34081	0.329	0.16	2.63231e-05
Pdcd1	3.15949e-09	0.508964	0.562	0.362	3.69565e-05
Lars2	3.34696e-09	-0.409266	0.715	0.852	3.91493e-05
Emb	4.23515e-09	-0.417497	0.382	0.606	4.95386e-05
Gpd2	5.09432e-09	0.325658	0.265	0.113	5.95882e-05
Lef1	5.99022e-09	-0.410583	0.121	0.289	7.00676e-05
Cd52	6.01509e-09	0.315755	0.994	0.99	7.03585e-05
Rpl17	6.45421e-09	-0.178263	0.997	0.99	7.54949e-05
Gm20186	6.5372e-09	-0.412612	0.235	0.427	7.64656e-05
AC163354.1	6.64559e-09	0.259042	0.138	0.035	7.77334e-05
Tnfrsf9	6.83894e-09	0.523952	0.45	0.267	7.9995e-05
Ccl3	8.41764e-09	1.46178	0.4	0.242	9.84611e-05
Cxcr3	8.86527e-09	-0.359216	0.385	0.589	0.000103697
Slc37a2	1.07213e-08	0.222936	0.112	0.023	0.000125406
Arl4c	1.53691e-08	-0.446476	0.509	0.655	0.000179773
Rpl37a	1.63831e-08	-0.166734	0.994	0.993	0.000191634
Slamf6	2.08268e-08	-0.30464	0.182	0.378	0.000243611
Rpl12	2.4224e-08	-0.239949	0.994	0.981	0.000283348
Tmem163	3.12973e-08	0.340018	0.259	0.118	0.000366085
Cers6	3.3594e-08	0.164451	0.106	0.021	0.000392949
Hist1h4d	4.04934e-08	-0.440501	0.229	0.402	0.000473651
Tmsb10	4.19786e-08	-0.259031	0.988	0.997	0.000491024
Reep5	4.57465e-08	0.381176	0.785	0.709	0.000535097
Litaf	5.51296e-08	0.314886	0.253	0.113	0.000644851
Casp3	5.96083e-08	0.460361	0.485	0.328	0.000697239
Rpl36	6.11808e-08	-0.188195	0.988	0.984	0.000715632
Frmd4a	6.54953e-08	0.194057	0.129	0.035	0.000766098
Tcf7	6.66527e-08	-0.283728	0.144	0.317	0.000779637
Klrd1	6.77782e-08	0.498503	0.771	0.747	0.000792802
Rps19	6.84403e-08	-0.248505	0.997	0.991	0.000800547
Anxa2	6.96287e-08	0.498866	0.753	0.744	0.000814447
Pdgfb	6.96335e-08	0.199282	0.124	0.031	0.000814503
Rps25	7.04354e-08	-0.247024	0.982	0.977	0.000823883
Rplp1	7.1211e-08	-0.201359	0.997	0.997	0.000832955
Rpl5	8.22578e-08	-0.260868	0.968	0.972	0.000962169
2310031A07Rik	8.6361e-08	0.291747	0.109	0.024	0.00101016
Lgals1	8.89667e-08	0.410484	0.976	0.953	0.00104064
Cst7	9.33348e-08	0.476652	0.668	0.563	0.00109174
Gm2682	1.06812e-07	-0.304352	0.185	0.362	0.00124938
Gm11808	1.08035e-07	-0.30463	0.862	0.899	0.00126368
Gzmb	1.11142e-07	0.648814	0.797	0.716	0.00130003
Capg	1.11173e-07	0.479664	0.662	0.526	0.00130039
Rhoc	1.12566e-07	0.241231	0.218	0.091	0.00131668
Trp53inp1	1.69879e-07	-0.368614	0.103	0.244	0.00198707
S100a6	1.75099e-07	0.406613	0.932	0.899	0.00204814
Rbpj	2.10348e-07	0.467202	0.512	0.378	0.00246044
Zfp36l2	2.56719e-07	-0.487039	0.668	0.794	0.00300284
Ssh2	2.72373e-07	-0.45195	0.247	0.406	0.00318595
Tespa1	3.08647e-07	-0.410771	0.265	0.42	0.00361025
Rpl41	3.28968e-07	-0.181186	0.994	0.995	0.00384794
Itgb7	3.30184e-07	-0.344201	0.365	0.547	0.00386217
Pmepa1	3.34546e-07	-0.443782	0.171	0.329	0.00391319
Pdcd4	3.74853e-07	-0.416027	0.591	0.74	0.00438466
Samsn1	4.1364e-07	0.395486	0.544	0.392	0.00483835
Il2rb	5.24479e-07	0.450013	0.721	0.671	0.00613483
Trps1	5.62147e-07	0.334778	0.244	0.124	0.00657543
Setbp1	6.82579e-07	0.201043	0.135	0.044	0.00798412
Rps18	7.40686e-07	-0.178042	0.994	0.991	0.0086638
Rap1a	1.2466e-06	0.320149	0.759	0.702	0.0145815
Klf2	1.33267e-06	-0.283002	0.521	0.695	0.0155882
Gpr18	1.33907e-06	-0.348201	0.159	0.305	0.0156631
Rplp2	1.38254e-06	-0.162015	0.991	0.995	0.0161716
Rps15	1.43751e-06	-0.181418	0.985	0.988	0.0168145
Dnajc1	1.58268e-06	0.36702	0.485	0.347	0.0185126
Tpt1	1.82027e-06	-0.109037	0.997	0.998	0.0212917
Phactr2	2.06003e-06	0.137698	0.126	0.04	0.0240962
Cx3cr1	2.10162e-06	0.265323	0.132	0.045	0.0245827
Nr4a2	2.18384e-06	0.408451	0.309	0.176	0.0255444
Rps27a	2.33537e-06	-0.148246	0.997	0.986	0.0273168
Bzw2	2.49073e-06	-0.336526	0.209	0.352	0.029134
Hmgn1	2.52494e-06	-0.292027	0.162	0.308	0.0295342
H2-D1	2.62864e-06	0.18446	1	1	0.0307472
Chn2	2.70998e-06	0.182849	0.15	0.057	0.0316986
Hip1	2.85832e-06	0.313966	0.303	0.172	0.0334338
Kbtbd11	2.97963e-06	-0.294399	0.203	0.354	0.0348528
Slc17a6	3.1208e-06	0.449616	0.191	0.085	0.036504
Sh3bgrl3	3.53996e-06	0.266034	0.965	0.96	0.0414069
Klhl6	3.89535e-06	-0.372833	0.194	0.321	0.0455639
2010111I01Rik	3.91244e-06	0.356947	0.441	0.308	0.0457638
Fkbp1a	3.99233e-06	0.286398	0.726	0.627	0.0466983
Nkg7	4.07816e-06	0.299323	0.941	0.934	0.0477022
Dusp4	4.34405e-06	0.218225	0.232	0.113	0.0508123
Itga1	4.44787e-06	0.226646	0.265	0.138	0.0520268
Galnt3	5.29594e-06	0.216717	0.165	0.07	0.0619466
Chd3	5.51223e-06	-0.326672	0.347	0.503	0.0644765
Mbp	5.73949e-06	-0.362565	0.224	0.368	0.0671349
Gcnt1	5.77725e-06	0.110969	0.121	0.04	0.0675765
Ada	6.51399e-06	0.226268	0.197	0.092	0.0761942
Rps6	6.95459e-06	-0.185565	0.979	0.974	0.0813478
Sp110	7.21504e-06	-0.383412	0.588	0.707	0.0843943
Zeb1	7.31289e-06	-0.307298	0.112	0.225	0.0855389
Fbxo6	8.06375e-06	0.218627	0.197	0.092	0.0943217
Ccl4	8.34005e-06	1.55125	0.568	0.451	0.0975536
Rack1	1.03177e-05	-0.162974	0.994	0.988	0.120686
Il7r	1.06166e-05	-0.450243	0.3	0.449	0.124183
Klk8	1.14067e-05	-0.304053	0.462	0.615	0.133425
Rps12	1.19204e-05	-0.169438	0.994	0.988	0.139433
Pdlim1	1.19848e-05	-0.207931	0.103	0.221	0.140186
a	1.2948e-05	0.187744	0.126	0.047	0.151452
Rpl31	1.29729e-05	-0.268371	0.891	0.929	0.151744
Serf2	1.32847e-05	0.186543	0.976	0.97	0.155391
Rpl18	1.36861e-05	-0.133212	0.997	0.993	0.160087
Ctsc	1.40427e-05	0.661316	0.394	0.27	0.164258
Sh3bp5	1.43319e-05	-0.256846	0.076	0.183	0.16764
Wdr89	1.44762e-05	-0.23743	0.835	0.876	0.169328
Sub1	1.47285e-05	0.274598	0.929	0.925	0.172279
Phlda1	1.75583e-05	0.328796	0.256	0.146	0.205379
1700017B05Rik	1.77694e-05	0.215706	0.174	0.08	0.207849
Plac8	1.79806e-05	0.528819	0.576	0.434	0.210319
Tspo	1.84636e-05	0.25431	0.941	0.906	0.215969
1700025G04Rik	1.93115e-05	-0.269917	0.1	0.207	0.225886
Rpl14	2.00255e-05	-0.158214	0.988	0.974	0.234238
Myl12a	2.12595e-05	0.233948	0.888	0.852	0.248672
1810041H14Rik	2.14226e-05	-0.198809	0.047	0.138	0.25058
Ablim1	2.17136e-05	-0.32123	0.626	0.746	0.253984
Tra2b	2.36864e-05	-0.308782	0.706	0.812	0.27706
Lamtor4	2.59616e-05	0.335717	0.638	0.542	0.303673
Cst3	2.62834e-05	1.0318	0.641	0.556	0.307437
Alcam	2.90137e-05	0.20207	0.191	0.094	0.339373
Rpl39	2.97944e-05	-0.160931	0.991	0.979	0.348505
Fth1	3.10569e-05	0.217653	0.997	0.972	0.363273
Pfn1	3.18613e-05	0.166816	0.985	0.983	0.372682
Txn1	3.34201e-05	0.23651	0.918	0.89	0.390915
Myl6	3.4022e-05	0.180332	0.982	0.97	0.397955
Klrc2	3.46321e-05	0.298849	0.624	0.488	0.405092
Uba52	3.53843e-05	-0.18439	0.935	0.949	0.41389
Rnf130	3.57905e-05	0.182399	0.165	0.077	0.418642
Sh3bgrl	3.73164e-05	0.231065	0.456	0.315	0.43649
Zbtb32	3.7958e-05	0.308725	0.229	0.129	0.443995
Samd3	4.0194e-05	-0.174373	0.091	0.195	0.470149
Rps24	4.39158e-05	-0.11995	0.997	0.988	0.513684
Serpina3g	4.7785e-05	0.337092	0.182	0.092	0.558941
Ifit3	4.97334e-05	-0.447636	0.279	0.399	0.581731
Gldc	5.32285e-05	0.107773	0.115	0.044	0.622614
Sytl2	5.44513e-05	0.228183	0.3	0.183	0.636917
mt-Nd1	5.45766e-05	-0.214586	0.956	0.974	0.638383
Osbpl3	5.4882e-05	0.239833	0.25	0.145	0.641955
Rpl10-ps3	5.53282e-05	-0.317344	0.574	0.664	0.647173
Matk	5.61758e-05	0.203594	0.141	0.061	0.657088
Arpc1b	5.74845e-05	0.181662	0.935	0.934	0.672396
Ubash3b	6.2969e-05	0.23534	0.253	0.15	0.736548
Ccr7	6.57642e-05	-0.0746388	0.047	0.129	0.769244
Itm2b	6.57819e-05	0.215911	0.968	0.944	0.76945
Zap70	6.71848e-05	0.296745	0.494	0.385	0.785861
Cxcr6	7.11966e-05	0.370774	0.709	0.666	0.832786
Tsc22d3	7.26024e-05	-0.390528	0.397	0.51	0.84923
Gzmm	7.31288e-05	-0.236748	0.029	0.101	0.855387
Ptpn6	7.58888e-05	0.232583	0.524	0.38	0.887671
Pag1	7.65199e-05	-0.227643	0.115	0.218	0.895053
Ech1	7.78756e-05	0.32273	0.621	0.517	0.91091
Glipr2	8.09157e-05	-0.238474	0.491	0.61	0.946471
Actg1	8.87129e-05	0.263694	0.994	0.988	1
Plk3	9.15804e-05	0.18148	0.182	0.092	1
Acot7	9.54827e-05	0.30549	0.426	0.312	1
Rps23	9.5943e-05	-0.122327	0.994	0.993	1
Ostc	9.60045e-05	0.231988	0.656	0.571	1
Erp29	0.000103344	0.349966	0.562	0.483	1
Arid5a	0.000108596	-0.365211	0.3	0.425	1
Rpl23	0.000112282	-0.123803	0.997	0.993	1
Grap	0.000118481	-0.249634	0.521	0.625	1
Tnfsf8	0.00012155	-0.15528	0.085	0.181	1
Spint2	0.000125737	0.266492	0.326	0.214	1
Oas3	0.000127371	-0.278204	0.212	0.329	1
Snrpd2	0.000128834	0.237188	0.821	0.737	1
Actn2	0.000128863	-0.198331	0.074	0.162	1
Ehd1	0.000132642	0.267704	0.259	0.157	1
Eif1	0.000135705	0.149656	0.991	0.979	1
Tgtp1	0.000144947	-0.23868	0.065	0.15	1
Dynlrb1	0.000152418	0.286208	0.529	0.425	1
Bspry	0.000154266	0.098069	0.126	0.054	1
Gna13	0.000158838	-0.320107	0.368	0.493	1
Gm156	0.000162077	0.446107	0.135	0.063	1
Mdfic	0.000166309	0.230897	0.391	0.27	1
Itih5	0.000169023	0.156801	0.103	0.04	1
mt-Co3	0.000171507	-0.16427	0.997	0.998	1
Cox8a	0.000172958	0.171303	0.956	0.948	1
Gm17745	0.000173149	0.111952	0.247	0.139	1
Arhgef3	0.000173707	-0.290151	0.112	0.206	1
Tgtp2	0.000174943	-0.322809	0.191	0.294	1
Txnip	0.000183356	-0.323187	0.538	0.631	1
Nop53	0.000183532	-0.266377	0.532	0.646	1
Bcl11b	0.000187496	-0.359805	0.526	0.632	1
Ehd4	0.000207264	0.21382	0.203	0.115	1
Rpl36a	0.000208493	-0.19291	0.974	0.958	1
Skap2	0.000208967	0.157359	0.147	0.071	1
Klrc1	0.000211728	0.308949	0.635	0.552	1
Sesn3	0.00021543	-0.274921	0.235	0.347	1
Rnf138	0.000216519	-0.280167	0.329	0.441	1
Rab37	0.000218185	-0.212572	0.138	0.24	1
Sdcbp2	0.00021975	0.232482	0.247	0.15	1
Rps26	0.0002403	-0.150761	0.988	0.984	1
Cyfip1	0.000241859	0.165185	0.159	0.08	1
Ccrl2	0.00024661	0.218384	0.206	0.117	1
Ndufa13	0.000251081	0.182191	0.885	0.869	1
Ms4a4c	0.000254544	-0.11748	0.259	0.38	1
Zeb2	0.000263441	0.402996	0.265	0.171	1
Nedd9	0.000266157	0.309068	0.465	0.354	1
Laptm4a	0.000269572	0.258479	0.447	0.338	1
Dock8	0.000276206	0.279999	0.429	0.319	1
Prdx1	0.000276904	0.282288	0.8	0.716	1
Ociad2	0.000282258	0.165733	0.112	0.049	1
Klf13	0.000307813	-0.170523	0.488	0.608	1
Card19	0.000310882	0.202812	0.315	0.209	1
S1pr1	0.000316846	-0.204972	0.124	0.225	1
Slc20a1	0.000318791	-0.347347	0.159	0.249	1
Gpr183	0.000355512	-0.306025	0.385	0.509	1
Twsg1	0.000357256	0.184725	0.138	0.068	1
Rtp4	0.000358829	-0.276034	0.421	0.512	1
Fis1	0.000366924	0.235701	0.756	0.706	1
Atp11b	0.000372751	-0.246176	0.559	0.648	1
Ifitm2	0.000378618	0.293643	0.315	0.207	1
Rps9	0.000398301	-0.123476	0.994	0.997	1
Ptms	0.000410738	0.273173	0.6	0.498	1
Tnrc6c	0.000414425	-0.279521	0.356	0.462	1
Fyn	0.000415255	-0.295579	0.485	0.57	1
Nsd3	0.000418839	-0.254146	0.626	0.739	1
Rpl36a-ps1	0.000429683	-0.203842	0.156	0.254	1
Stk39	0.00043917	0.254794	0.329	0.225	1
Acp5	0.000455042	-0.165747	0.359	0.479	1
Ppp1r12a	0.000471673	-0.28837	0.529	0.624	1
Emilin2	0.000473324	0.222085	0.132	0.064	1
Slc38a2	0.00048371	-0.35185	0.688	0.754	1
Trappc2l	0.000500595	0.241212	0.488	0.378	1
Ly9	0.000522809	-0.211367	0.138	0.23	1
Hmbox1	0.00055655	-0.214269	0.044	0.108	1
Fam189b	0.000565461	-0.280383	0.376	0.472	1
Ifitm3	0.000566246	0.891274	0.347	0.253	1
Fgl2	0.000568761	0.351559	0.553	0.46	1
Nfil3	0.000573785	0.174516	0.188	0.108	1
Abracl	0.000578267	0.257245	0.891	0.859	1
Dctn1	0.000578418	-0.195291	0.059	0.129	1
Tsix	0.000622386	-0.189548	0.094	0.178	1
Ifi27l2a	0.000625757	0.299315	0.871	0.864	1
Snrpg	0.000627488	-0.186603	0.876	0.916	1
Tnp2	0.000647028	-0.233115	0.059	0.127	1
Rnf149	0.000658483	0.180804	0.2	0.117	1
Rpl34	0.000658862	-0.0813895	1	0.986	1
Cbx1	0.000679426	0.189	0.488	0.378	1
Cyth1	0.000685596	-0.289409	0.144	0.233	1
Rpl15	0.000688548	-0.120559	0.982	0.988	1
Cers4	0.000717593	0.191953	0.315	0.218	1
mt-Nd4l	0.000756556	0.301038	0.506	0.409	1
Ube2n	0.000781937	0.24119	0.476	0.368	1
Tcof1	0.000782359	-0.226508	0.3	0.397	1
Arf5	0.000798819	0.204292	0.85	0.845	1
Crlf2	0.000802783	0.217858	0.353	0.26	1
Arpc5	0.000824473	0.232814	0.856	0.826	1
mt-Nd2	0.000828422	-0.197102	0.959	0.963	1
Calm2	0.000837231	0.204247	0.741	0.681	1
Atp5f1	0.000863676	0.180075	0.832	0.805	1
Cmtm6	0.000870097	-0.140685	0.153	0.244	1
Jund	0.000874718	0.17727	0.965	0.951	1
Adap1	0.000886417	0.0848766	0.124	0.059	1
Irf3	0.000896451	-0.207494	0.138	0.226	1
Irgm1	0.000908888	-0.152452	0.276	0.389	1
Itga4	0.000927725	0.250465	0.618	0.512	1
Fosl2	0.000948296	-0.172981	0.224	0.322	1
Arhgap25	0.000971691	-0.202467	0.126	0.213	1
Adgrg5	0.000982665	-0.168657	0.079	0.155	1
Tpm4	0.00100493	0.215915	0.479	0.382	1
Etnk1	0.0010059	-0.316202	0.338	0.432	1
Grap2	0.00103242	-0.220465	0.306	0.42	1
Raph1	0.00104608	0.200262	0.185	0.11	1
Klf3	0.00105274	-0.0249977	0.094	0.174	1
Ripor2	0.00105501	-0.236937	0.203	0.31	1
Rps20	0.00106059	-0.135226	1	0.997	1
Ifitm1	0.00107531	0.374927	0.194	0.113	1
Raf1	0.00111219	-0.234837	0.141	0.226	1
Hsp90aa1	0.001114	-0.239917	0.75	0.821	1
Rhoa	0.00112742	0.186162	0.9	0.882	1
Rasa3	0.00112915	-0.187461	0.159	0.254	1
Mrpl9	0.00113523	-0.21198	0.244	0.336	1
Ifit3b	0.00116391	-0.195859	0.141	0.232	1
Zcchc11	0.00119029	-0.223691	0.518	0.629	1
Wdr82	0.00122639	-0.218601	0.179	0.272	1
Utrn	0.00125404	-0.242663	0.365	0.462	1
Fam46a	0.00126349	0.202899	0.194	0.117	1
Tpst2	0.00126437	-0.197696	0.447	0.552	1
Tex9	0.00126491	0.15564	0.179	0.103	1
Chchd2	0.00126563	0.174349	0.95	0.904	1
Mxi1	0.00126589	0.170805	0.179	0.103	1
Dapl1	0.00126994	-0.402417	0.062	0.129	1
Rpsa	0.00129989	-0.126786	0.988	0.998	1
Lin9	0.00134518	0.11283	0.1	0.045	1
Plp2	0.0013565	0.207828	0.438	0.333	1
Serpinb6a	0.00138017	0.335381	0.471	0.382	1
Selenoi	0.00139964	0.140196	0.235	0.15	1
Ifngr1	0.00146877	-0.226986	0.774	0.829	1
Rps8	0.00149012	-0.10888	0.997	0.995	1
Kif13b	0.00150021	0.249416	0.229	0.146	1
Cpne3	0.00150102	-0.317412	0.188	0.275	1
Eef2	0.00150255	-0.18041	0.9	0.946	1
Pja1	0.00151469	-0.146085	0.126	0.218	1
Magohb	0.00152095	0.19	0.279	0.186	1
Igf2r	0.0015231	0.153711	0.212	0.129	1
Cmah	0.00152618	-0.183932	0.071	0.139	1
Rps10	0.00153536	-0.0785668	0.994	0.991	1
Cdk6	0.0015959	0.250556	0.485	0.376	1
Ndufb8	0.00160723	0.206845	0.662	0.594	1
Hsp90b1	0.00163884	0.261631	0.768	0.753	1
Smad7	0.00164833	-0.310337	0.453	0.556	1
Inpp5b	0.00165349	0.159015	0.194	0.12	1
Serinc3	0.00166851	0.251035	0.562	0.465	1
Psme1	0.00167227	-0.154556	0.894	0.92	1
Tcrg-C2	0.00168741	0.294745	0.188	0.113	1
Hnrnpf	0.00170196	-0.153505	0.865	0.892	1
Ehd3	0.00171052	-0.195301	0.15	0.237	1
Rcbtb1	0.0017471	-0.181017	0.059	0.122	1
Fam26f	0.00175314	-0.235923	0.218	0.31	1
Fam53b	0.00178768	-0.0888689	0.253	0.359	1
AB124611	0.00181832	-0.134176	0.229	0.334	1
Utp14a	0.00186369	-0.169401	0.159	0.249	1
Rundc3b	0.00186655	-0.127908	0.059	0.124	1
Smpdl3b	0.0018787	0.100396	0.103	0.049	1
4930523C07Rik	0.00187962	-0.202516	0.435	0.537	1
Scml4	0.0018904	-0.100388	0.065	0.132	1
C1qtnf6	0.00192301	0.134192	0.126	0.066	1
Auh	0.00193173	0.18383	0.294	0.206	1
Pik3ip1	0.00196108	-0.183896	0.059	0.122	1
Tbcb	0.00198033	0.247208	0.35	0.267	1
Kcnn4	0.00200655	-0.102972	0.144	0.233	1
Atp6v1a	0.00200729	0.181436	0.224	0.146	1
Gfpt1	0.00203885	0.189332	0.218	0.141	1
Apobr	0.00209607	0.155756	0.188	0.115	1
Gnl3	0.0021206	-0.167934	0.197	0.291	1
Ctla4	0.00212252	0.309654	0.312	0.22	1
Calm3	0.00214819	0.154177	0.632	0.544	1
Elmo2	0.00222666	0.121479	0.138	0.075	1
Rbm22	0.00223548	-0.14237	0.268	0.378	1
Ssbp2	0.00226726	-0.170522	0.118	0.197	1
Gbp2	0.00229936	-0.321893	0.274	0.361	1
mt-Nd3	0.00231033	-0.19916	0.576	0.662	1
Rpa2	0.00232598	0.255761	0.365	0.286	1
Cebpb	0.00233563	0.45158	0.35	0.253	1
Gm26917	0.00243095	-0.31031	0.565	0.631	1
Slfn2	0.00245011	-0.221582	0.794	0.845	1
Wipf2	0.00245111	-0.161754	0.074	0.138	1
Ythdf3	0.00251024	-0.211484	0.126	0.202	1
Hdgfl3	0.0025184	-0.185338	0.085	0.152	1
Psmb10	0.00253209	-0.209241	0.756	0.787	1
Ifnar2	0.00254269	-0.183435	0.244	0.333	1
Cd8b1	0.00254285	-0.196574	0.868	0.918	1
Lsm6	0.00257391	0.160519	0.515	0.411	1
Tfam	0.00266584	-0.11924	0.135	0.22	1
Ndfip1	0.00274451	0.283189	0.506	0.422	1
Efhd2	0.00274693	0.15639	0.474	0.371	1
Ddx60	0.00276788	-0.206104	0.191	0.284	1
AA467197	0.00277013	0.199164	0.276	0.188	1
Impa1	0.00279975	0.184733	0.341	0.244	1
Clic1	0.00282471	0.143069	0.944	0.944	1
Rpl13a	0.00282659	-0.160856	0.868	0.871	1
Rps7	0.00287419	-0.0974216	0.997	0.99	1
Amz2	0.00287471	-0.160035	0.079	0.145	1
Sdcbp	0.00294338	0.252094	0.485	0.399	1
Cd7	0.00295443	-0.212849	0.221	0.31	1
Dnajc8	0.00296122	0.223317	0.662	0.587	1
Tmem209	0.00298941	-0.149235	0.053	0.11	1
Fto	0.00299383	-0.0904437	0.062	0.125	1
Gbp7	0.00304413	-0.293459	0.606	0.676	1
Slfn1	0.00307989	-0.30085	0.594	0.674	1
Trpv2	0.00308899	-0.257862	0.206	0.284	1
Ppib	0.00311557	0.180499	0.891	0.88	1
Ift20	0.00312055	0.222975	0.497	0.415	1
Dctn3	0.00313748	0.190771	0.565	0.474	1
U2af1	0.0031845	0.190778	0.553	0.465	1
Arhgef18	0.0032137	-0.213648	0.094	0.16	1
Rpl19	0.00323112	-0.0754391	0.994	0.991	1
H2-K1	0.00327744	0.134409	0.994	1	1
Ralgapa1	0.00330583	0.142077	0.185	0.117	1
Ttc13	0.00330776	-0.195036	0.071	0.132	1
Il16	0.0033115	-0.227879	0.276	0.359	1
Cxcr4	0.00331675	-0.273464	0.053	0.11	1
Foxo1	0.00333665	-0.0873625	0.132	0.218	1
Myc	0.00333894	-0.195908	0.159	0.24	1
Gng5	0.00335313	0.145444	0.862	0.861	1
Mbnl2	0.00340471	0.22184	0.288	0.207	1
Fxyd5	0.00340838	0.125286	0.979	0.97	1
Bmp2k	0.00344425	0.0297902	0.1	0.049	1
Atp6v0e	0.00348749	0.18761	0.8	0.775	1
Cbl	0.00349466	-0.16852	0.232	0.321	1
Eci2	0.00351514	0.142207	0.253	0.171	1
Trmt10c	0.00356511	-0.177305	0.097	0.166	1
Fkbp3	0.0035675	-0.167953	0.659	0.742	1
Sp100	0.00361663	-0.214355	0.782	0.838	1
Fam241a	0.0036228	-0.0976976	0.05	0.106	1
Dusp22	0.00362512	0.126196	0.118	0.063	1
Mef2a	0.00375444	0.173852	0.353	0.258	1
Errfi1	0.00379897	-0.214752	0.126	0.199	1
Eif3f	0.00389501	-0.143486	0.888	0.894	1
Lcor	0.0038999	0.126236	0.129	0.071	1
1810037I17Rik	0.00391673	0.199403	0.8	0.758	1
Snhg12	0.00392652	-0.171788	0.271	0.368	1
Dscr3	0.00400973	-0.127151	0.079	0.143	1
Ctnnb1	0.00402257	0.187439	0.274	0.193	1
AC149090.1	0.00402693	0.181361	0.515	0.423	1
Diaph1	0.00407314	0.198049	0.653	0.573	1
Plscr1	0.00413013	0.168829	0.244	0.166	1
Kcnab2	0.00415831	-0.172056	0.124	0.195	1
Pcmt1	0.00418017	0.208894	0.391	0.305	1
Rps14	0.00421974	-0.0576286	0.994	0.984	1
Trgv2	0.00422279	0.193689	0.124	0.068	1
Agl	0.00430393	0.0543403	0.132	0.073	1
Adamts6	0.00430448	0.103389	0.1	0.051	1
Stard3nl	0.00435895	0.161059	0.3	0.218	1
Cd96	0.00436207	0.204384	0.409	0.321	1
Socs1	0.00436742	-0.174791	0.415	0.516	1
Dusp6	0.00440234	0.0532037	0.247	0.16	1
Pfdn5	0.00442084	0.155697	0.947	0.943	1
Tor1a	0.00442571	-0.198959	0.212	0.3	1
Atp5j	0.00445506	0.136239	0.85	0.791	1
AI467606	0.00446131	-0.167041	0.085	0.146	1
Rpl21	0.00448402	-0.0957226	0.988	0.986	1
Atp2b1	0.00460431	0.202031	0.606	0.514	1
Ciapin1	0.00466861	0.220598	0.406	0.319	1
Siah2	0.00470146	0.148133	0.188	0.12	1
Son	0.00473988	-0.216513	0.803	0.848	1
Foxp1	0.00477667	-0.199276	0.374	0.458	1
Ptprcap	0.00477814	0.13803	0.929	0.925	1
Anxa11	0.00490255	0.218418	0.288	0.218	1
Pmm2	0.00492217	-0.0879661	0.147	0.226	1
Sit1	0.00492287	-0.13407	0.182	0.27	1
Polr2l	0.00492715	0.114228	0.182	0.113	1
Id2	0.00495061	0.245786	0.882	0.88	1
Tomm40	0.00502034	-0.177621	0.179	0.258	1
Snx3	0.00504244	0.190472	0.629	0.554	1
Plekhf2	0.00510244	-0.148689	0.076	0.138	1
Zfp36	0.00510941	-0.137704	0.353	0.462	1
Sec11c	0.00514568	0.189954	0.776	0.711	1
Commd3	0.0052139	0.212619	0.426	0.35	1
Nfatc2	0.00522075	-0.160375	0.088	0.152	1
Rpl27	0.00523775	-0.0784462	0.997	0.981	1
Cox17	0.00524244	0.193648	0.815	0.819	1
Filip1l	0.00528772	0.107025	0.176	0.11	1
Rps17	0.00539353	-0.122319	0.947	0.944	1
Ubxn11	0.00542307	0.147041	0.165	0.103	1
Stx7	0.00545176	0.121778	0.112	0.061	1
Exosc5	0.00546453	-0.152208	0.203	0.279	1
Ccz1	0.00554268	-0.163566	0.176	0.247	1
Thumpd1	0.00558669	-0.177432	0.144	0.218	1
Ncl	0.00561197	-0.220479	0.788	0.859	1
Hspa1b	0.00562209	-0.145145	0.365	0.469	1
Rab8a	0.00563912	-0.172987	0.606	0.69	1
Jmjd1c	0.00571282	-0.244036	0.4	0.481	1
Cetn3	0.00580977	-0.179964	0.303	0.382	1
Mbd3	0.00587793	-0.202799	0.276	0.361	1
Gnptab	0.00589145	0.129607	0.221	0.143	1
Stx8	0.0059387	0.167047	0.385	0.298	1
Eef1g	0.00597058	-0.155798	0.756	0.819	1
Rpl10a	0.00604405	-0.125041	0.988	0.976	1
Asb13	0.00604893	-0.0707204	0.179	0.261	1
Smap1	0.006049	-0.131685	0.597	0.69	1
Pitpnm2	0.00613378	0.138085	0.138	0.082	1
Ak2	0.00618612	-0.188061	0.306	0.392	1
Pmvk	0.00627557	0.144974	0.168	0.105	1
Adcy7	0.00630868	0.19991	0.462	0.375	1
Slc48a1	0.00635511	0.14648	0.15	0.092	1
Orai3	0.00635767	0.11531	0.138	0.082	1
Itgb2	0.00646414	0.201846	0.6	0.552	1
Slc28a2	0.00654587	0.131147	0.162	0.101	1
Rpl23a	0.00655393	-0.139244	0.976	0.97	1
Golm1	0.00658028	-0.168242	0.141	0.213	1
Eif3c	0.00659175	-0.180606	0.632	0.692	1
Ccdc186	0.00662216	0.184766	0.15	0.091	1
Prdx5	0.00663618	0.299539	0.676	0.629	1
Sympk	0.00668068	-0.116794	0.071	0.127	1
Ifit1	0.00684041	-0.32767	0.262	0.343	1
H2-T24	0.00686586	-0.129977	0.079	0.138	1
Arid2	0.00687346	-0.101239	0.079	0.141	1
Fbl	0.00700134	-0.164689	0.324	0.408	1
Pdia6	0.00705107	0.243434	0.541	0.472	1
Rras2	0.00705505	-0.0911392	0.059	0.113	1
Sidt1	0.00706433	-0.117285	0.135	0.209	1
Tmbim4	0.00709457	0.14726	0.341	0.258	1
Erich1	0.00710948	-0.135037	0.159	0.239	1
Abhd8	0.00733079	-0.0937954	0.229	0.314	1
Arl1	0.00733594	0.163615	0.412	0.328	1
S100a10	0.00734274	0.225264	0.971	0.96	1
H2afx	0.00746744	-0.134628	0.162	0.233	1
Hipk1	0.00749203	-0.295645	0.332	0.409	1
Yipf3	0.00761776	0.153735	0.356	0.274	1
Ubald2	0.00764423	-0.1353	0.362	0.451	1
Zfp236	0.00766156	0.161923	0.1	0.054	1
Rpl8	0.00767191	-0.102754	0.991	0.991	1
Unc119	0.00767804	0.176097	0.371	0.289	1
Tarbp2	0.00767928	-0.0885483	0.05	0.101	1
Ube2w	0.00770438	0.0932104	0.179	0.115	1
Tmem245	0.00774829	-0.121559	0.068	0.124	1
Ndufb9	0.00774837	0.173618	0.718	0.681	1
Rpl4	0.00782253	-0.118947	0.959	0.965	1
Hspa5	0.00784757	0.263489	0.821	0.841	1
Irf2bpl	0.00790226	-0.161689	0.176	0.249	1
Chsy1	0.00793002	0.145827	0.35	0.268	1
Ncoa2	0.00799853	-0.212464	0.147	0.214	1
Manf	0.00802002	0.237471	0.671	0.605	1
Rap2b	0.00802489	-0.161535	0.132	0.204	1
Cdk2ap2	0.0080608	-0.146211	0.597	0.681	1
Oaz1	0.00823502	0.0977269	0.968	0.956	1
Runx3	0.00839393	-0.224645	0.656	0.707	1
Atp6v1f	0.0083992	0.153331	0.841	0.833	1
Mapre1	0.00846199	0.225403	0.553	0.474	1
Pcbd2	0.00865169	0.139855	0.294	0.216	1
Ssr4	0.00868493	0.14726	0.741	0.692	1
Trnt1	0.00871678	-0.192716	0.197	0.272	1
Aatf	0.00873294	-0.118659	0.1	0.164	1
Ndufs5	0.00874293	0.203776	0.644	0.591	1
Ankrd28	0.00874814	0.0817127	0.112	0.063	1
Tagln2	0.0087638	-0.0857395	0.753	0.814	1
Tmem50a	0.00877214	0.116161	0.835	0.78	1
Cyb5r3	0.00905028	0.118809	0.159	0.099	1
Ddx21	0.00920539	-0.190978	0.376	0.455	1
Pcgf5	0.00922732	-0.141252	0.253	0.331	1
Actn1	0.00928877	0.0834695	0.129	0.077	1
Mir155hg	0.0093184	0.196992	0.118	0.068	1
Rdx	0.0093508	-0.278189	0.365	0.441	1
Fau	0.00939103	-0.0623795	0.997	1	1
Lsm1	0.00943253	0.221433	0.368	0.289	1
Cd3d	0.00943527	0.146437	0.929	0.956	1
Abr	0.00949718	0.168973	0.203	0.136	1
Luzp1	0.00951385	-0.162199	0.082	0.138	1
Rps6ka1	0.00952934	0.164473	0.35	0.263	1
Gprin3	0.00962379	-0.139932	0.103	0.166	1
Ubqln1	0.010051	0.106098	0.2	0.132	1
Dpp4	0.0102196	-0.240432	0.209	0.279	1
Mitd1	0.0102253	-0.234237	0.341	0.401	1
Tmem126a	0.0102478	0.18117	0.409	0.336	1
H2-T23	0.0102924	0.195088	0.953	0.936	1
Selenot	0.0102935	-0.142775	0.276	0.352	1
Riox2	0.0103395	0.0952561	0.129	0.077	1
Bscl2	0.0103507	-0.11262	0.291	0.369	1
Ifit1bl1	0.0103932	-0.172899	0.085	0.141	1
Rgs3	0.0103947	0.183343	0.4	0.326	1
Dad1	0.0104875	0.186558	0.806	0.777	1
Ptch1	0.0104963	0.0744195	0.132	0.078	1
Trim26	0.0105198	-0.170506	0.291	0.371	1
Exoc3	0.0105557	-0.150863	0.265	0.345	1
Eif3h	0.0105658	0.117472	0.906	0.923	1
Med11	0.0105908	0.177679	0.203	0.141	1
Anxa1	0.0106243	0.170711	0.215	0.148	1
Tpp1	0.0106752	0.190294	0.153	0.099	1
Mylip	0.0107078	-0.191334	0.074	0.125	1
Itgb3bp	0.010763	-0.114512	0.076	0.131	1
Cspp1	0.0108282	-0.206955	0.112	0.171	1
Cd69	0.0108402	-0.172905	0.694	0.772	1
Ppp1r2	0.0109525	0.13307	0.312	0.237	1
Calr	0.0110709	0.199651	0.776	0.747	1
Gak	0.0110744	-0.163461	0.121	0.179	1
Atpif1	0.0110888	0.187879	0.612	0.528	1
Ppp6c	0.0111304	-0.206384	0.235	0.31	1
Twf1	0.0111811	-0.116527	0.071	0.124	1
Cfl1	0.0111929	0.123135	0.959	0.969	1
Cep250	0.0112101	0.139876	0.218	0.152	1
9030624J02Rik	0.0113055	-0.150829	0.065	0.115	1
Eef1b2	0.011342	-0.106663	0.965	0.956	1
Nars	0.0113681	-0.158849	0.274	0.357	1
Ormdl1	0.0114105	0.145974	0.256	0.185	1
Cox5a	0.0114232	0.168663	0.847	0.848	1
Chst12	0.0114601	0.105341	0.153	0.098	1
Vcpip1	0.0114888	-0.186718	0.156	0.223	1
Axin1	0.011583	-0.154004	0.085	0.139	1
Dapp1	0.0117526	-0.196507	0.194	0.265	1
Phpt1	0.0118343	-0.0875843	0.068	0.12	1
Gabarap	0.0118932	0.169713	0.824	0.78	1
Srsf1	0.0120658	0.160607	0.382	0.301	1
Casp4	0.0121203	0.185653	0.141	0.089	1
Gm45716	0.0122029	0.110364	0.135	0.084	1
Asrgl1	0.0122306	-0.140549	0.179	0.256	1
2022-09-07	0.0122488	0.151171	0.724	0.7	1
Ahcyl1	0.0122534	0.148839	0.2	0.141	1
Cebpzos	0.0123047	0.153671	0.218	0.152	1
Sem1	0.012334	0.16034	0.879	0.869	1
Dapk2	0.0123914	0.150342	0.238	0.171	1
Cstb	0.0124542	0.271481	0.462	0.392	1
Rps27l	0.0126424	0.256996	0.585	0.528	1
Ccm2	0.0126624	-0.134414	0.185	0.26	1
Rbm28	0.0127118	-0.182469	0.185	0.249	1
Celf1	0.0127276	-0.212549	0.288	0.354	1
Sema4d	0.0127736	0.171888	0.326	0.258	1
Gapdh	0.0128796	0.184946	0.976	0.967	1
Ccnl1	0.0129337	0.153382	0.609	0.521	1
Acat1	0.0130842	-0.148963	0.224	0.296	1
Tesc	0.0130996	-0.191312	0.138	0.202	1
Pcnx	0.0131057	0.0920065	0.1	0.056	1
Madd	0.0131147	-0.193969	0.135	0.2	1
Tgds	0.0131164	0.0901402	0.115	0.066	1
Arhgap15	0.0132672	-0.138944	0.482	0.551	1
2810006K23Rik	0.0133278	0.103864	0.124	0.073	1
Crls1	0.0133799	0.147057	0.106	0.061	1
Bax	0.0135119	0.225101	0.609	0.542	1
Ndfip2	0.0136331	0.251203	0.476	0.425	1
Commd10	0.0136753	0.126751	0.112	0.066	1
Tle3	0.0137182	-0.129589	0.185	0.256	1
Susd3	0.0137772	0.10913	0.315	0.233	1
Clptm1	0.0138207	0.142232	0.2	0.138	1
Akap8	0.0138401	-0.227542	0.191	0.254	1
Slc22a15	0.0138956	0.0510797	0.182	0.118	1
Serpinb6b	0.0139362	0.207789	0.329	0.254	1
Cdc14a	0.0139414	0.0719803	0.209	0.146	1
Ddx52	0.01395	-0.160167	0.162	0.232	1
Actr3	0.0139736	0.130093	0.9	0.885	1
Dnajb11	0.0139756	0.209208	0.515	0.439	1
Rpl22	0.0140006	-0.0933788	0.979	0.979	1
Surf6	0.0140442	-0.104403	0.056	0.103	1
Xist	0.0140748	-0.220008	0.924	0.944	1
Mgst2	0.0141738	-0.0793857	0.115	0.181	1
AY036118	0.0142769	-0.132804	0.815	0.871	1
Scyl3	0.0143778	-0.0843931	0.059	0.106	1
Tbl1xr1	0.0143854	-0.21101	0.212	0.282	1
Setd5	0.0144493	0.175207	0.338	0.256	1
Sash3	0.0146006	-0.220257	0.356	0.427	1
mt-Atp6	0.0147824	-0.114684	1	1	1
Rictor	0.0148934	-0.185203	0.25	0.326	1
Glmn	0.0149446	0.134906	0.135	0.085	1
Srp19	0.015061	0.207496	0.606	0.542	1
Bcl2l11	0.0151182	0.126735	0.285	0.218	1
Avl9	0.0151774	-0.172195	0.276	0.352	1
Dusp10	0.0152084	-0.163337	0.079	0.127	1
Ccndbp1	0.0152855	-0.181293	0.321	0.395	1
Fam174a	0.0152925	0.0614938	0.182	0.118	1
Eri1	0.015328	-0.122079	0.176	0.247	1
2310039H08Rik	0.0153823	-0.166658	0.112	0.167	1
Gabpb2	0.015391	-0.180133	0.224	0.298	1
Hist1h2ae	0.0153982	0.211219	0.176	0.12	1
Bex3	0.0154039	0.210433	0.35	0.284	1
Junb	0.0154145	-0.156816	0.835	0.88	1
Cox7a2	0.0155097	0.142923	0.876	0.85	1
Pabpc1	0.0155866	-0.164159	0.888	0.916	1
Washc1	0.0157159	-0.05183	0.097	0.153	1
Mndal	0.0159551	-0.214783	0.862	0.899	1
Rgs1	0.0159973	0.402982	0.676	0.627	1
Pde7a	0.0162486	-0.137699	0.297	0.378	1
Flna	0.0162921	-0.243889	0.382	0.437	1
Lcp1	0.0163146	0.113032	0.85	0.861	1
Nrn1	0.0163476	0.122006	0.174	0.117	1
Smc6	0.0163884	-0.194807	0.544	0.613	1
Tecpr1	0.0164109	-0.189784	0.274	0.347	1
Crtam	0.0164389	-0.125997	0.156	0.22	1
Ssna1	0.0164791	0.15907	0.426	0.357	1
H2-M3	0.0166329	0.216784	0.447	0.373	1
Calm1	0.0167706	0.202567	0.974	0.962	1
2010107E04Rik	0.0169138	-0.13298	0.753	0.796	1
Trp53i13	0.0169503	-0.14549	0.085	0.136	1
Ctsb	0.0171476	0.386557	0.485	0.43	1
Gbp4	0.0171803	-0.207814	0.656	0.7	1
Ppp2r5a	0.0171995	-0.140947	0.441	0.517	1
Cd200r4	0.0173005	0.140761	0.144	0.094	1
Fibp	0.0174842	0.132739	0.194	0.134	1
Vdac2	0.017509	0.185658	0.712	0.669	1
Prpf38b	0.0175188	-0.20848	0.512	0.577	1
Nck1	0.0175251	-0.153388	0.203	0.27	1
Sugp1	0.0175453	-0.157852	0.068	0.113	1
Gbp9	0.0176265	-0.219436	0.315	0.392	1
Coro1b	0.0176612	0.18531	0.415	0.348	1
Psmb3	0.0178048	0.150072	0.8	0.782	1
Anp32a	0.0178319	-0.160943	0.679	0.744	1
Gpr132	0.0178534	-0.161372	0.132	0.193	1
Impdh1	0.0179373	-0.103004	0.129	0.192	1
Cblb	0.0179584	0.166604	0.521	0.456	1
Sec61g	0.0180289	0.135447	0.838	0.826	1
Atf7ip	0.0180907	-0.270917	0.344	0.409	1
Ndufs6	0.0180934	0.186714	0.629	0.573	1
Sh3kbp1	0.0181222	0.143051	0.609	0.533	1
Abcg1	0.018274	-0.157404	0.162	0.223	1
Brd2	0.0183118	-0.143244	0.438	0.521	1
Chd9	0.0183864	0.150405	0.106	0.063	1
Bri3	0.0183972	0.145152	0.4	0.334	1
Hcst	0.0184124	0.118993	0.915	0.909	1
Sp3	0.0186717	-0.0895573	0.224	0.303	1
Cetn2	0.0187325	0.230969	0.441	0.378	1
Lyst	0.0187385	0.184072	0.388	0.317	1
H2-Q1	0.0190374	0.114326	0.153	0.101	1
Ddx18	0.0191133	-0.0902015	0.253	0.333	1
C130026I21Rik	0.0192253	0.153044	0.253	0.186	1
Atp2a3	0.0193285	-0.166604	0.188	0.251	1
Ccr5	0.019346	0.140706	0.462	0.389	1
Dnajc15	0.0193619	-0.148816	0.415	0.495	1
Vps72	0.0193713	-0.147174	0.144	0.207	1
Taf1d	0.0193811	-0.136984	0.406	0.477	1
Mdm4	0.0194354	-0.240607	0.306	0.369	1
Ly6c2	0.0194991	-0.274445	0.765	0.784	1
Rbm38	0.0195027	-0.212347	0.182	0.242	1
Nsd2	0.0195185	0.120605	0.276	0.213	1
Dusp19	0.0195512	0.0775432	0.135	0.085	1
Tceanc2	0.0196332	0.134934	0.156	0.105	1
Spag9	0.0197498	0.140715	0.341	0.27	1
Dusp5	0.019935	0.128086	0.432	0.352	1
Ftl1	0.0199443	0.317932	0.921	0.934	1
Endod1	0.0200192	0.0929342	0.191	0.131	1
Papola	0.0200369	-0.199371	0.397	0.47	1
Prdx6	0.0200953	-0.120612	0.676	0.732	1
Dgkh	0.0201758	0.0853006	0.132	0.084	1
Mpg	0.0202409	0.106985	0.191	0.131	1
Smpdl3a	0.020288	-0.153906	0.365	0.446	1
Alad	0.0204236	0.115588	0.291	0.22	1
Srp14	0.0204429	0.154517	0.782	0.77	1
Prkcq	0.0204461	-0.159145	0.421	0.479	1
Iigp1	0.0207321	-0.233669	0.1	0.153	1
Etfb	0.0208793	0.146406	0.479	0.415	1
Mynn	0.0209184	0.106735	0.141	0.091	1
Ccdc88c	0.0209795	-0.219028	0.224	0.293	1
Arpc2	0.0209896	0.104687	0.953	0.953	1
Agpat4	0.0210465	0.147564	0.176	0.122	1
Rrbp1	0.0211033	0.213503	0.506	0.458	1
0610010K14Rik	0.0211069	0.1183	0.191	0.132	1
Psma3	0.0211845	0.117451	0.771	0.732	1
Zfp787	0.0213417	0.085494	0.15	0.098	1
Mon2	0.0213542	0.155805	0.121	0.077	1
Lamtor1	0.0217098	0.215326	0.429	0.362	1
Cdkn2aipnl	0.0217163	-0.160504	0.191	0.254	1
Bcap29	0.0217295	0.185364	0.262	0.202	1
2022-03-07	0.0218043	-0.169873	0.288	0.359	1
Rpl24	0.0218396	-0.0638816	0.997	0.99	1
Il2ra	0.0219694	0.0634611	0.112	0.068	1
Dnlz	0.0219905	0.133572	0.206	0.15	1
Hnrnpa0	0.0220307	-0.0916813	0.791	0.857	1
Elf4	0.0222033	-0.171275	0.197	0.258	1
Atp2b4	0.0222649	0.223	0.356	0.296	1
Clec2i	0.0222696	-0.121405	0.082	0.132	1
Pdcd1lg2	0.022362	0.0714959	0.126	0.08	1
Lamp2	0.0223968	0.149568	0.318	0.251	1
Chic2	0.0225208	0.193167	0.562	0.503	1
Gbp8	0.0225793	-0.0797579	0.285	0.369	1
Gtf2h1	0.0225911	-0.130409	0.118	0.174	1
Fkbp4	0.0229545	-0.145041	0.279	0.343	1
Mfsd4a	0.0230291	-0.0938052	0.071	0.117	1
Exosc10	0.0231303	-0.159838	0.082	0.129	1
Fmnl1	0.0235137	-0.204646	0.329	0.389	1
Atp1b3	0.0235265	-0.171886	0.55	0.599	1
Bst2	0.023611	-0.23258	0.671	0.728	1
Fbxw7	0.0239002	-0.0785272	0.109	0.166	1
Hnrnpl	0.0239344	0.125072	0.521	0.455	1
Dpm3	0.0239621	-0.0646356	0.482	0.557	1
Nsmaf	0.0240232	0.183872	0.291	0.225	1
Ldb1	0.0241416	-0.147806	0.209	0.279	1
Il2rg	0.0246313	-0.0852002	0.691	0.751	1
Ppil4	0.0248082	-0.0969869	0.238	0.308	1
Fam49a	0.0248698	-0.0835158	0.088	0.139	1
Retreg3	0.0250109	-0.146763	0.085	0.134	1
Gm10260	0.0250793	0.204461	0.588	0.516	1
Ifi203	0.0251854	-0.232789	0.821	0.841	1
Rad54l2	0.0253321	0.0820949	0.174	0.12	1
Ssbp1	0.025522	0.165677	0.476	0.422	1
Uqcrh	0.0257401	0.0982425	0.95	0.937	1
Nlrc5	0.02588	-0.214936	0.244	0.307	1
Dnajc7	0.0258837	-0.145493	0.376	0.451	1
Nsmce4a	0.0259012	0.108802	0.438	0.368	1
Rasa1	0.0259426	0.137923	0.306	0.239	1
Arpc3	0.0261359	0.0986007	0.915	0.909	1
Lpgat1	0.0261796	0.198667	0.159	0.111	1
Eno3	0.0262417	0.173452	0.135	0.091	1
Rps4x	0.0263014	-0.0596389	0.991	0.979	1
Gsn	0.0263602	0.165903	0.106	0.066	1
Slfn5	0.0264449	-0.376517	0.229	0.289	1
Anxa4	0.0264635	0.134866	0.121	0.077	1
Dut	0.0264845	0.150127	0.45	0.389	1
Ccdc9	0.0266053	-0.0705411	0.076	0.124	1
Tmem161b	0.0266625	-0.189889	0.085	0.132	1
Igtp	0.02672	-0.243257	0.491	0.549	1
Rpl30	0.0267253	-0.0551376	0.997	0.986	1
Twistnb	0.0267634	-0.10739	0.238	0.314	1
Fam122a	0.0268562	0.103859	0.165	0.117	1
Dbi	0.0270192	0.156132	0.579	0.502	1
Pacsin2	0.0270297	0.0642488	0.126	0.08	1
Nek7	0.0270395	-0.125347	0.274	0.34	1
Zfp592	0.027059	-0.12971	0.079	0.127	1
Itga6	0.0271253	-0.13646	0.079	0.127	1
Gxylt1	0.0271483	0.157003	0.194	0.141	1
Ralgps2	0.0272056	-0.081696	0.085	0.136	1
Nckap1l	0.0273278	0.121683	0.271	0.207	1
Aldh9a1	0.0273535	0.144891	0.156	0.108	1
Hspa4	0.027435	0.158555	0.409	0.345	1
Psma1	0.0275834	0.126653	0.594	0.531	1
Ubl5	0.0277295	0.161152	0.9	0.887	1
Map3k7	0.0277904	-0.113013	0.068	0.111	1
Rab29	0.0278351	0.0889344	0.112	0.07	1
Srgn	0.0278519	0.222761	0.956	0.965	1
Ctla2a	0.0279336	0.215127	0.75	0.693	1
Hspa1a	0.0279812	-0.0988761	0.262	0.341	1
Parp11	0.0280378	-0.117727	0.079	0.125	1
Rpl7a	0.0281782	-0.0691161	0.971	0.97	1
Pcif1	0.0282043	-0.210165	0.303	0.354	1
Irf1	0.028221	-0.210069	0.438	0.498	1
Cops9	0.0282478	-0.147325	0.618	0.685	1
Aim2	0.0282865	0.0961435	0.321	0.24	1
Papd5	0.0284572	-0.151254	0.094	0.141	1
Ifi35	0.0287069	-0.184325	0.45	0.512	1
Dcaf12	0.0287297	0.0776091	0.159	0.108	1
Acot9	0.028733	0.164998	0.244	0.183	1
Zc3h12a	0.0287644	-0.138303	0.065	0.106	1
Tuba1a	0.0288139	-0.118639	0.309	0.382	1
Nisch	0.0288693	-0.159361	0.288	0.352	1
Nmt2	0.0288788	-0.0887664	0.071	0.117	1
Tceal9	0.0290538	0.122777	0.265	0.202	1
Ube2b	0.02908	-0.11053	0.641	0.728	1
Tbc1d15	0.0291009	-0.099344	0.144	0.197	1
Phf20l1	0.0291344	0.11096	0.518	0.458	1
Golim4	0.0293101	0.102356	0.182	0.129	1
Rps6kb2	0.0293565	0.109214	0.106	0.066	1
Ezh1	0.0294365	0.0813374	0.15	0.099	1
Tnk2	0.0294706	-0.0765168	0.059	0.101	1
Psma7	0.0297618	0.135308	0.835	0.798	1
Zbtb11	0.0297716	-0.121475	0.085	0.132	1
Oxct1	0.0298625	0.124141	0.288	0.228	1
Nsa2	0.0300546	-0.113381	0.794	0.829	1
Mrps33	0.0301308	0.169242	0.509	0.446	1
Dnajb9	0.0301415	-0.146439	0.1	0.148	1
2900060B14Rik	0.0302334	-0.105411	0.085	0.131	1
Fbxo8	0.0302376	-0.0518413	0.079	0.125	1
Rpl28	0.0303216	-0.0726118	0.997	0.993	1
Rps15a	0.0303513	0.0883487	0.997	0.993	1
Smc3	0.030361	-0.160517	0.332	0.399	1
1110038F14Rik	0.0304155	-0.201591	0.25	0.305	1
Tob2	0.0304706	-0.161947	0.221	0.282	1
Pkn1	0.0305115	-0.162472	0.318	0.378	1
Arl8a	0.0305777	0.0934756	0.171	0.117	1
Cenpc1	0.0309109	0.050894	0.1	0.061	1
Msi2	0.0310817	0.16536	0.341	0.274	1
Adam17	0.0313556	0.104132	0.268	0.206	1
Rilpl2	0.0313731	0.288751	0.376	0.319	1
9130401M01Rik	0.0313954	0.0888664	0.174	0.122	1
Cd101	0.0314691	-0.108403	0.062	0.105	1
Bcl10	0.0315194	0.108301	0.412	0.329	1
Fam69a	0.0316609	-0.106765	0.094	0.143	1
Xrn2	0.0318533	-0.180862	0.641	0.679	1
Mcub	0.031965	0.118339	0.112	0.071	1
Nfkb2	0.0321058	0.105937	0.124	0.08	1
Nol12	0.032197	-0.117325	0.221	0.287	1
Fam78a	0.0322205	-0.261315	0.238	0.291	1
Itm2a	0.0323431	0.0738188	0.165	0.113	1
Gnai2	0.032391	0.121821	0.888	0.876	1
1700097N02Rik	0.0325996	-0.21395	0.285	0.347	1
Itpr2	0.0327285	-0.142101	0.244	0.307	1
Samd9l	0.0327603	-0.275402	0.494	0.559	1
Dcaf15	0.0328386	-0.10559	0.121	0.172	1
Cox5b	0.0329449	0.113739	0.859	0.868	1
Rab5c	0.0329976	-0.112332	0.409	0.479	1
Topors	0.0332427	-0.126671	0.115	0.166	1
Rac1	0.0332526	0.140234	0.709	0.688	1
Vim	0.0334774	0.166737	0.938	0.913	1
Ctsa	0.0335097	0.170983	0.403	0.338	1
Eid1	0.0337247	0.176924	0.391	0.328	1
Orc4	0.0337303	-0.166624	0.171	0.225	1
Glrx2	0.0337917	0.104024	0.371	0.307	1
D430042O09Rik	0.0338653	0.129403	0.106	0.066	1
Kdm4c	0.0339463	-0.126531	0.091	0.138	1
Asap1	0.0343996	-0.139359	0.147	0.202	1
Setd1b	0.0346205	-0.120578	0.106	0.157	1
Mrps6	0.0346769	0.149443	0.259	0.2	1
Stim1	0.0346838	-0.16555	0.259	0.321	1
Tvp23b	0.0347503	0.161869	0.168	0.12	1
Zfp560	0.0349131	0.112251	0.194	0.139	1
Agpat5	0.0349282	-0.123415	0.088	0.134	1
Rtraf	0.034969	0.136387	0.694	0.652	1
Mydgf	0.0350078	0.105325	0.329	0.261	1
Ubac2	0.0353563	-0.147224	0.229	0.296	1
Kif5b	0.0354789	0.116062	0.538	0.469	1
Plekhj1	0.0357067	0.158113	0.535	0.469	1
Rab19	0.0357563	-0.184967	0.259	0.312	1
M6pr	0.0357747	0.110313	0.391	0.328	1
Osbp	0.0358172	-0.122649	0.106	0.153	1
Cd86	0.0358645	0.0756406	0.2	0.146	1
Taf15	0.0362174	-0.133002	0.362	0.43	1
Meaf6	0.0362256	0.144085	0.168	0.12	1
Pgs1	0.0363039	-0.092342	0.138	0.193	1
Pgls	0.0364289	0.117238	0.603	0.549	1
Sharpin	0.0364861	0.100009	0.238	0.178	1
Arhgdib	0.0365457	-0.112599	0.962	0.946	1
Ddx19b	0.0369045	-0.112877	0.079	0.122	1
Eif5b	0.0370225	0.207538	0.521	0.472	1
Rpl18a	0.037106	-0.0488592	1	0.984	1
Cir1	0.0372485	-0.147345	0.259	0.319	1
Far1	0.0372757	0.0363048	0.232	0.169	1
Nudcd2	0.0375795	-0.136004	0.226	0.282	1
Saraf	0.0379821	-0.146394	0.606	0.655	1
Xdh	0.0380023	0.0937458	0.109	0.07	1
Emc10	0.0380027	0.184871	0.429	0.376	1
Cul2	0.0380449	0.0435037	0.126	0.084	1
Sh3glb2	0.038304	0.0878707	0.191	0.139	1
Arf1	0.0383649	0.145745	0.718	0.695	1
Ppia	0.0383961	0.0629301	0.985	0.983	1
Fos	0.0384631	-0.0144497	0.547	0.606	1
Etfa	0.03847	-0.144337	0.253	0.312	1
Ncf4	0.0385996	0.15941	0.544	0.484	1
Kif15	0.0386877	0.0544337	0.115	0.075	1
Psmd14	0.0391531	-0.137762	0.376	0.432	1
Tmem14c	0.0393578	0.198009	0.618	0.563	1
Snrnp48	0.0394059	-0.203031	0.356	0.413	1
Samhd1	0.0394163	-0.112928	0.647	0.735	1
Ikzf1	0.0394456	-0.170072	0.476	0.549	1
Fam120a	0.0395923	0.128539	0.303	0.242	1
Tmed3	0.0396874	0.105427	0.256	0.193	1
Actr5	0.0397081	-0.107892	0.065	0.105	1
Rtn3	0.0397538	0.144632	0.435	0.371	1
Creg1	0.0397748	0.121055	0.153	0.108	1
Rlf	0.0398748	0.163386	0.394	0.331	1
Hddc2	0.0399111	-0.190098	0.182	0.228	1
Gbp2b	0.0400255	-0.215427	0.262	0.315	1
Dyrk2	0.0401585	-0.0611255	0.103	0.153	1
Gm11127	0.0402537	0.114498	0.156	0.11	1
Mtap	0.0403196	-0.0913731	0.1	0.146	1
D10Jhu81e	0.0404248	-0.11112	0.129	0.181	1
Psmd13	0.0405611	0.0993211	0.474	0.387	1
Anapc1	0.0405867	-0.15251	0.126	0.176	1
Zfp644	0.0406842	-0.253115	0.379	0.434	1
Ep400	0.0407266	-0.192458	0.229	0.284	1
2310001H17Rik	0.0407364	-0.123515	0.194	0.254	1
Pstk	0.0407416	-0.140897	0.124	0.171	1
Acaa1a	0.0410897	0.0896726	0.224	0.166	1
Ykt6	0.0411362	0.108332	0.132	0.089	1
Prkcb	0.041242	-0.129909	0.097	0.143	1
Csnk1g3	0.0412796	0.00320882	0.168	0.226	1
Tug1	0.0413125	-0.135607	0.138	0.19	1
Commd8	0.0414157	-0.104444	0.303	0.373	1
D030056L22Rik	0.0416001	-0.0751576	0.079	0.124	1
Rbm43	0.0416521	-0.126276	0.118	0.166	1
Pnisr	0.0418016	0.162303	0.576	0.507	1
Tmem87a	0.0418494	0.117409	0.156	0.108	1
Ppip5k2	0.0420113	0.0708183	0.179	0.129	1
Taf10	0.0420749	0.116836	0.759	0.699	1
BC004004	0.0421707	0.10212	0.212	0.155	1
Elmsan1	0.0421921	-0.0932144	0.082	0.127	1
Cdk19	0.0422947	-0.11966	0.085	0.127	1
Usp50	0.0423515	-0.115978	0.121	0.169	1
Grk6	0.0424151	-0.129812	0.226	0.287	1
Senp2	0.0425003	-0.182142	0.271	0.331	1
Adgrb2	0.0425515	0.0809365	0.135	0.091	1
Htt	0.0427154	-0.0949869	0.106	0.153	1
Mapkapk2	0.0427224	0.207325	0.247	0.193	1
Skp1a	0.0427315	-0.0986243	0.25	0.312	1
Nubp1	0.0428533	0.1109	0.315	0.256	1
Erg28	0.0430524	0.122086	0.335	0.275	1
Sf3b6	0.0431237	0.147757	0.732	0.7	1
Dlg1	0.0432459	0.0401136	0.135	0.091	1
P2ry10	0.0433796	-0.144682	0.271	0.328	1
Atp6ap2	0.0434345	0.10893	0.294	0.235	1
Irak1	0.0438048	0.0816071	0.259	0.199	1
Rab7	0.043924	-0.0988304	0.415	0.493	1
Tmx2	0.0439929	-0.129984	0.106	0.15	1
Skiv2l	0.0441579	0.120777	0.138	0.096	1
Fam3c	0.0441695	0.113375	0.226	0.172	1
Cox6c	0.0445163	0.112701	0.926	0.913	1
Peli1	0.0445517	-0.103079	0.524	0.561	1
Cnot6l	0.0447687	-0.1515	0.506	0.571	1
Xaf1	0.0448123	-0.240988	0.524	0.57	1
Pank2	0.0448928	-0.129391	0.176	0.23	1
Gm11361	0.0449346	-0.131929	0.568	0.611	1
Gpatch4	0.0450011	-0.116091	0.079	0.12	1
Rps5	0.0450172	-0.0813632	0.997	0.995	1
Acadm	0.0450837	0.130187	0.174	0.127	1
Crem	0.0451818	0.121656	0.356	0.291	1
Ccdc43	0.045206	-0.0967944	0.068	0.108	1
Slc25a11	0.0453076	0.133885	0.426	0.366	1
Fam96a	0.045369	0.16945	0.485	0.427	1
Sri	0.0458514	0.122131	0.779	0.749	1
Fermt3	0.0458867	-0.144603	0.468	0.547	1
Mkln1	0.0459278	0.086693	0.347	0.277	1
Cd3e	0.0459946	0.0757863	0.909	0.949	1
Timm8a1	0.0460136	0.0697155	0.188	0.138	1
Cd2ap	0.046217	-0.174753	0.135	0.181	1
Ptges3	0.0462951	-0.222159	0.409	0.472	1
Arl14ep	0.0463212	0.0824855	0.179	0.129	1
Mff	0.0464329	-0.0897692	0.285	0.352	1
Vamp8	0.0465375	0.180685	0.665	0.634	1
Ano10	0.0468202	-0.0805165	0.071	0.11	1
Nab2	0.0468766	0.0754676	0.141	0.098	1
Ikbkb	0.0469252	-0.180426	0.274	0.331	1
Serbp1	0.046944	-0.116216	0.915	0.908	1
Keap1	0.0471075	-0.0901061	0.25	0.31	1
Scamp2	0.0471228	0.122355	0.279	0.225	1
Gm2000	0.0473818	-0.116507	0.326	0.392	1
2210016F16Rik	0.0477696	0.10536	0.285	0.225	1
Zrsr1	0.0478	-0.0958882	0.085	0.129	1
Arhgap30	0.0481254	-0.141665	0.638	0.699	1
Prkch	0.0482154	0.101008	0.326	0.267	1
Chst2	0.0483029	0.141569	0.206	0.152	1
Rab1a	0.0483259	0.192389	0.2	0.157	1
Mrpl28	0.0483798	0.123515	0.209	0.164	1
Mob1a	0.0484361	0.12219	0.453	0.387	1
Rps3	0.0484811	-0.0492619	1	0.986	1
Mtpn	0.0486152	0.147762	0.485	0.427	1
Kdm5a	0.0486562	-0.132844	0.279	0.341	1
Il10rb	0.0487944	-0.121666	0.365	0.418	1
Cenpa	0.0491344	0.0385972	0.262	0.206	1
Mier1	0.049167	-0.221925	0.562	0.605	1
Dek	0.0493017	-0.115159	0.624	0.707	1
Ehmt2	0.0494364	0.0715993	0.221	0.164	1
Tm2d2	0.049553	0.140332	0.156	0.111	1
A630001G21Rik	0.0496048	-0.104788	0.1	0.145	1
Pard6a	0.0496476	0.0945104	0.1	0.064	1
Gm10076	0.0498551	0.106894	0.462	0.395	1
Leprot	0.0499009	0.183912	0.265	0.209	1
Gm4070	0.0499249	0.0809474	0.144	0.101	1
Evl	0.0500827	-0.168479	0.479	0.533	1
Stk17b	0.0501364	-0.114949	0.853	0.885	1
Cxxc1	0.0504844	-0.0783616	0.109	0.157	1
Cenpw	0.0505525	0.124646	0.209	0.159	1
Nrf1	0.0506539	-0.0510445	0.121	0.171	1
Ptma	0.0506769	0.108745	0.985	0.986	1
Commd1	0.0506915	0.100766	0.341	0.275	1
Ybx1	0.0506922	0.11112	0.894	0.862	1
Idh3g	0.0509595	-0.0940153	0.244	0.303	1
Smchd1	0.0513618	-0.194273	0.568	0.631	1
Cc2d1b	0.0515252	-0.132153	0.094	0.136	1
Clic4	0.0516009	0.0865493	0.203	0.152	1
Bet1	0.0516872	0.091469	0.188	0.139	1
Vti1a	0.0518195	0.10298	0.159	0.115	1
Hps3	0.052026	0.170881	0.126	0.089	1
Npepps	0.0521004	-0.138411	0.132	0.181	1
2510039O18Rik	0.0522089	-0.0609905	0.162	0.216	1
Ncoa1	0.0523384	-0.0614675	0.079	0.12	1
Def6	0.0525457	-0.138123	0.309	0.376	1
Gtf2i	0.0528035	-0.157155	0.294	0.348	1
Lrmp	0.052832	0.104015	0.374	0.312	1
Tnfrsf4	0.0530185	0.22135	0.153	0.106	1
Lmbr1l	0.0534341	-0.113024	0.074	0.111	1
Txndc12	0.0536167	0.0904075	0.182	0.134	1
Socs3	0.054046	-0.119195	0.129	0.179	1
Lgals8	0.0540684	-0.107364	0.188	0.242	1
Gpr171	0.0540958	-0.110767	0.335	0.399	1
Cd8a	0.05472	0.149958	0.882	0.925	1
Nceh1	0.0547412	-0.0764216	0.082	0.122	1
Il3ra	0.0549841	0.078764	0.109	0.071	1
Cd38	0.0551155	0.155179	0.212	0.162	1
Gabbr1	0.0556908	-0.0677204	0.079	0.118	1
Hspe1	0.0557287	-0.124691	0.738	0.772	1
Eif4a2	0.0558321	-0.121365	0.544	0.599	1
Pdha1	0.0559347	-0.138856	0.244	0.298	1
Rnf38	0.0559893	-0.0950852	0.085	0.125	1
Bhlhe40	0.0561292	0.0651887	0.515	0.436	1
Prpf8	0.05624	0.0675341	0.303	0.239	1
Apmap	0.0563438	-0.081627	0.065	0.101	1
Pa2g4	0.0565333	-0.0882368	0.312	0.378	1
Rheb	0.0568997	0.17865	0.488	0.434	1
Rnf213	0.0570522	-0.124462	0.338	0.39	1
Arid4a	0.0571639	-0.201403	0.3	0.347	1
Rnaseh2a	0.0572019	-0.133647	0.135	0.181	1
Ap2s1	0.0572348	0.147141	0.585	0.523	1
Spen	0.0573794	-0.133064	0.091	0.131	1
Sdf2l1	0.0575331	0.127289	0.321	0.26	1
Pcsk7	0.057567	0.120915	0.265	0.213	1
Crim1	0.0577286	-0.111731	0.135	0.183	1
Cops2	0.0577473	0.112713	0.282	0.228	1
Zbtb38	0.0579368	0.10059	0.235	0.179	1
Nt5dc1	0.0579603	-0.163275	0.141	0.19	1
Lrrk1	0.0580095	0.0190441	0.109	0.07	1
Klrk1	0.0589208	0.127504	0.759	0.718	1
Armc10	0.0589292	-0.0920329	0.132	0.179	1
Arcn1	0.059011	0.127651	0.318	0.256	1
Gps1	0.0590933	0.0570562	0.224	0.169	1
Ndufaf4	0.0591031	-0.0765521	0.15	0.199	1
Ttc9c	0.0591096	0.110047	0.132	0.092	1
Gimap3	0.0595145	-0.157167	0.862	0.878	1
Emg1	0.059602	-0.103351	0.618	0.667	1
Chpt1	0.0596567	0.12028	0.171	0.125	1
Taok3	0.0599149	-0.21096	0.276	0.322	1
Ssrp1	0.0600185	-0.125766	0.347	0.394	1
Wdr95	0.0600704	0.0735976	0.168	0.12	1
Selenok	0.060185	0.115921	0.771	0.787	1
Pak2	0.060454	0.167055	0.688	0.655	1
Irf7	0.0604581	-0.121058	0.5	0.571	1
Srsf9	0.0605357	0.0985194	0.318	0.261	1
Arl5c	0.0605365	-0.010818	0.097	0.143	1
Ube2m	0.0605506	0.102814	0.415	0.347	1
Nt5c3b	0.0605666	-0.138827	0.244	0.287	1
Icam2	0.0605884	-0.050055	0.085	0.127	1
C1d	0.0606044	0.107757	0.315	0.254	1
Lactb	0.0615378	0.12787	0.144	0.103	1
Hexa	0.0618189	0.117811	0.132	0.094	1
Akap8l	0.0618325	0.094985	0.215	0.164	1
Nup35	0.0618753	-0.10049	0.079	0.117	1
Mcm7	0.0621336	-0.0737753	0.1	0.143	1
Btg3	0.0622324	0.125367	0.124	0.087	1
Nfkbiz	0.0622331	-0.132771	0.218	0.267	1
Comt	0.0628772	0.0860909	0.209	0.16	1
Cdca7l	0.0630204	-0.14383	0.121	0.162	1
Mark2	0.0630411	-0.118856	0.321	0.378	1
1600014C10Rik	0.0631027	-0.138959	0.188	0.239	1
Tmem60	0.0631716	-0.0892043	0.138	0.186	1
Tmed7	0.063237	0.129943	0.288	0.233	1
Cab39l	0.0632496	-0.119928	0.156	0.206	1
Ube2l6	0.0633823	-0.125131	0.153	0.197	1
mt-Co2	0.0634231	-0.0825576	0.994	1	1
Adprm	0.0634249	0.0334194	0.144	0.103	1
Wdr76	0.0634534	-0.142198	0.082	0.12	1
Casc3	0.0635315	-0.137066	0.118	0.16	1
Ppwd1	0.063717	-0.120188	0.191	0.244	1
Parp10	0.063847	-0.0897296	0.141	0.186	1
H2-Ab1	0.0638678	0.616095	0.109	0.075	1
Ptpn12	0.0640339	0.0918894	0.126	0.089	1
Imp3	0.0640856	-0.0723695	0.359	0.423	1
Rabep1	0.0643681	0.0858025	0.221	0.167	1
Yme1l1	0.0644572	-0.144139	0.282	0.338	1
Kctd20	0.0644943	0.130061	0.121	0.084	1
Mif4gd	0.0646683	-0.136514	0.215	0.265	1
Tm2d3	0.0646971	0.103733	0.206	0.157	1
Usp48	0.0651537	-0.1324	0.182	0.237	1
Grn	0.0655127	0.275194	0.121	0.085	1
Zkscan3	0.0655431	-0.12122	0.159	0.209	1
Gnb2	0.0655562	0.0891127	0.782	0.753	1
Ccnh	0.0655768	-0.13071	0.176	0.226	1
Cryzl1	0.0655937	0.0789823	0.138	0.099	1
Elavl1	0.0656525	-0.118407	0.329	0.382	1
Chmp4b	0.0657313	0.0911351	0.674	0.625	1
Gstp3	0.0658416	-0.155829	0.276	0.333	1
Rnh1	0.0659583	0.237687	0.441	0.395	1
Farsa	0.0660749	0.156608	0.276	0.223	1
Derl1	0.0662302	0.17338	0.374	0.308	1
Golph3	0.0662441	0.082241	0.238	0.185	1
Eif4g2	0.0663498	-0.12019	0.659	0.695	1
Rps13	0.0666851	-0.0350791	0.997	0.998	1
Ift27	0.0666969	-0.0992915	0.088	0.127	1
Picalm	0.0669008	0.0509048	0.521	0.439	1
Jarid2	0.0671016	0.157659	0.318	0.263	1
Sfr1	0.0672623	-0.10786	0.521	0.578	1
Psmg4	0.067349	-0.0509467	0.321	0.385	1
Nmt1	0.0676077	-0.0700044	0.291	0.368	1
Sertad1	0.0678022	-0.0884298	0.176	0.226	1
Cstf3	0.0680013	0.118703	0.144	0.105	1
Ppil3	0.0682763	0.0506866	0.312	0.247	1
Slc29a1	0.0686673	0.162927	0.129	0.092	1
Nelfb	0.0689366	-0.146011	0.162	0.209	1
Kdelr2	0.0689422	0.146518	0.309	0.26	1
Tcp11l2	0.0693865	0.0801655	0.188	0.143	1
Ncor1	0.0694986	-0.145002	0.709	0.739	1
Rpl22l1	0.0696318	-0.137026	0.879	0.908	1
Stard3	0.0696789	0.0786604	0.124	0.087	1
Atxn2l	0.0697971	-0.161209	0.282	0.34	1
Orai1	0.0698398	0.222678	0.371	0.326	1
Txndc17	0.069858	-0.1041	0.597	0.643	1
Abcb9	0.0698629	0.0924378	0.291	0.237	1
Tcp1	0.0699644	-0.157888	0.388	0.427	1
Adsl	0.0699783	-0.12458	0.112	0.152	1
Plekho2	0.0700112	0.0720909	0.176	0.131	1
Xlr4c	0.0701386	-0.16737	0.144	0.185	1
Lrch1	0.0702665	0.094436	0.103	0.07	1
Rnf4	0.0703953	0.133221	0.294	0.244	1
Ppig	0.0707768	0.19415	0.506	0.449	1
Sntb2	0.0710125	-0.172975	0.162	0.207	1
Tagap	0.0710654	-0.0882123	0.097	0.138	1
Ubqln2	0.0711317	-0.0907076	0.103	0.145	1
Ints10	0.0713722	0.0194695	0.118	0.078	1
Prmt3	0.0714755	-0.0742178	0.076	0.113	1
Eci1	0.0716616	0.0791444	0.188	0.143	1
Ndufa6	0.0717767	-0.0882074	0.709	0.779	1
Cyba	0.0718589	0.12833	0.924	0.934	1
Themis	0.0719475	-0.130901	0.429	0.491	1
BC031181	0.0719563	0.151766	0.576	0.524	1
Ankib1	0.0720383	-0.0726702	0.2	0.254	1
Dcun1d5	0.0720789	-0.0997932	0.429	0.495	1
Ubap2	0.0721343	-0.191328	0.132	0.174	1
Ids	0.0722104	0.0534384	0.1	0.066	1
Pgp	0.0722964	-0.0955618	0.176	0.23	1
Tdrp	0.0725721	-0.129968	0.085	0.122	1
Rtf1	0.0726043	-0.0895602	0.465	0.514	1
Ndufv1	0.0726341	-0.126092	0.253	0.301	1
Brd7	0.0726461	-0.13581	0.224	0.274	1
Csnk1g1	0.0727563	-0.124898	0.168	0.213	1
Exosc8	0.0727779	-0.0964398	0.397	0.448	1
Rplp0	0.0727927	-0.0790511	1	0.993	1
Bin2	0.072888	-0.0585207	0.553	0.625	1
Prpf4b	0.073193	0.128542	0.565	0.528	1
Tma7	0.0734326	0.0831361	0.915	0.906	1
Ppp1ca	0.073622	0.11352	0.862	0.862	1
Plekhb2	0.0737768	0.0714522	0.226	0.178	1
Gyg	0.0740517	0.170781	0.182	0.143	1
Ilf2	0.0743173	-0.116361	0.241	0.3	1
Smad4	0.0743612	-0.133029	0.224	0.274	1
Ly75	0.0746258	0.0715004	0.159	0.117	1
Fam117a	0.0747037	-0.0605105	0.079	0.118	1
Sptlc1	0.0748318	-0.122576	0.109	0.148	1
Psmb6	0.0751331	0.154452	0.647	0.608	1
Nmi	0.0751502	-0.0970715	0.509	0.57	1
Polr2k	0.0752202	0.183267	0.494	0.458	1
Ndufb11	0.075381	0.155975	0.759	0.739	1
B930036N10Rik	0.0755451	-0.121005	0.074	0.108	1
Crnkl1	0.0756258	-0.0992241	0.156	0.206	1
Emp1	0.0761309	-0.141954	0.153	0.202	1
Arpc1a	0.0762505	0.0908069	0.247	0.195	1
Rsf1	0.0763354	-0.136157	0.268	0.328	1
Fdxr	0.0764316	0.0891691	0.153	0.113	1
Trappc6b	0.0764428	0.132138	0.462	0.399	1
Irf2bp1	0.0767339	-0.0414579	0.088	0.129	1
Hist1h1e	0.0771373	0.0972185	0.632	0.571	1
Impdh2	0.077268	-0.0920453	0.212	0.261	1
Rbmx	0.0775099	0.102087	0.138	0.101	1
Aamp	0.0777512	0.15482	0.424	0.364	1
Sbf1	0.0779857	-0.0921631	0.112	0.155	1
mt-Cytb	0.0780937	-0.0644719	0.991	0.988	1
Sars	0.0782852	-0.0790095	0.432	0.481	1
Ino80	0.078293	-0.147753	0.103	0.141	1
Cyb5r4	0.0783626	0.0605256	0.194	0.148	1
Lmbrd1	0.0783965	0.0552072	0.135	0.098	1
Zfp672	0.0785297	-0.107815	0.079	0.115	1
Sumo2	0.0787635	0.0485252	0.868	0.864	1
Cobll1	0.0791113	0.0316235	0.103	0.068	1
Fam111a	0.0791285	-0.128517	0.229	0.272	1
Exosc4	0.0793475	-0.0743583	0.279	0.334	1
Cdc37	0.0794466	-0.0931297	0.603	0.669	1
Tbk1	0.0795182	-0.142397	0.182	0.228	1
Arid5b	0.0795478	0.200411	0.382	0.333	1
Uck2	0.0797643	-0.0924462	0.097	0.136	1
Psmd7	0.0802383	-0.0406404	0.388	0.462	1
AU019823	0.0803617	-0.0149179	0.115	0.162	1
Gmcl1	0.0806338	-0.0571506	0.071	0.106	1
Jkamp	0.0806656	0.12051	0.15	0.111	1
Cops7a	0.0807735	0.0661563	0.138	0.099	1
1500011B03Rik	0.0809035	-0.0827958	0.097	0.134	1
Rftn1	0.0810819	-0.106631	0.176	0.226	1
Dtx3l	0.0812438	-0.103222	0.374	0.418	1
Emc6	0.0813147	0.127291	0.426	0.376	1
Fut7	0.0813773	0.0577658	0.135	0.096	1
Crip1	0.0813839	-0.0410543	0.885	0.904	1
Psmd9	0.0814708	0.0643308	0.232	0.183	1
Dctn5	0.0816859	-0.109964	0.144	0.186	1
Nsmce3	0.0817555	-0.10489	0.176	0.221	1
Ubr4	0.0818464	-0.104714	0.197	0.249	1
Cbll1	0.0819159	-0.0242902	0.103	0.145	1
Ipo8	0.0820538	0.080702	0.141	0.103	1
Pofut2	0.0821752	0.108381	0.171	0.129	1
Arpp19	0.0823751	-0.0890818	0.697	0.723	1
Gon7	0.0824381	-0.106379	0.118	0.157	1
Rsrp1	0.0824628	0.0401108	0.806	0.817	1
Acot13	0.082516	-0.089402	0.179	0.228	1
Mcm5	0.0825851	-0.0761421	0.112	0.152	1
Pigt	0.0829725	-0.0906246	0.138	0.183	1
Ifi27	0.0832207	0.13264	0.541	0.483	1
Tbc1d10a	0.0833475	-0.079017	0.103	0.143	1
Triap1	0.0834094	-0.0782015	0.203	0.254	1
Plcg1	0.0834595	-0.154411	0.194	0.235	1
Mbip	0.083463	0.0436419	0.109	0.075	1
Glipr1	0.0836138	0.150965	0.335	0.282	1
Leprotl1	0.0836302	-0.200337	0.656	0.704	1
Fuca1	0.0837133	0.0785473	0.3	0.244	1
Rasgrp1	0.0837487	-0.173192	0.288	0.336	1
Ankrd54	0.0837548	-0.100868	0.109	0.148	1
Plin3	0.0838122	-0.0737154	0.071	0.105	1
Gmpr2	0.0840495	-0.082427	0.079	0.115	1
9930111J21Rik2	0.0841274	-0.119826	0.465	0.523	1
Ascc3	0.0841485	-0.183579	0.318	0.366	1
Herc4	0.0842471	-0.147914	0.197	0.244	1
Il21r	0.0843763	-0.0822601	0.15	0.199	1
Taf7	0.0843773	-0.169251	0.282	0.329	1
Ergic3	0.084379	0.158343	0.332	0.275	1
Rnf31	0.0844899	0.0667823	0.118	0.082	1
Serpinb9	0.0846178	0.129012	0.259	0.214	1
Tor1aip1	0.0849009	0.0728188	0.471	0.425	1
Tmem167	0.0850225	0.132646	0.668	0.634	1
Inpp5d	0.0850273	-0.120323	0.25	0.305	1
Atp6v1h	0.0850353	0.106416	0.297	0.246	1
Cdkn2d	0.0851606	-0.126457	0.341	0.383	1
Cdc42se2	0.0854769	-0.110065	0.382	0.432	1
Ube2j2	0.0856689	0.120834	0.382	0.324	1
Il12rb2	0.0861825	0.0731284	0.182	0.138	1
Tmem242	0.0863156	0.115493	0.156	0.117	1
Prex1	0.0863693	0.139608	0.476	0.42	1
Gimap9	0.0868462	-0.136169	0.535	0.575	1
Lims1	0.0868802	0.104226	0.356	0.296	1
Pds5a	0.0868987	0.0630556	0.321	0.265	1
Prkx	0.0869399	0.0982509	0.194	0.148	1
Ddx6	0.0870633	-0.107437	0.432	0.497	1
Rora	0.0871235	-0.145381	0.209	0.263	1
Ktn1	0.0871473	-0.178905	0.2	0.242	1
Ttc3	0.0872204	0.0860347	0.241	0.19	1
Tnfaip8	0.0873155	-0.0812433	0.506	0.587	1
Nt5e	0.0873266	-0.0988901	0.082	0.118	1
Csk	0.0873581	-0.112792	0.453	0.51	1
Tbrg1	0.0873832	-0.166449	0.559	0.577	1
Fdps	0.0874834	0.155736	0.182	0.143	1
Nipsnap1	0.0875669	-0.0882411	0.082	0.117	1
Ctps2	0.0877296	-0.110782	0.121	0.16	1
Zc3h7a	0.0879287	0.0901313	0.318	0.263	1
Eomes	0.0882973	-0.108474	0.124	0.164	1
Ddx58	0.0883496	-0.0693411	0.294	0.371	1
Atp5g1	0.0883521	0.104324	0.671	0.641	1
Tob1	0.0886662	-0.0750784	0.132	0.174	1
Wwp2	0.0888899	0.139172	0.147	0.11	1
Ier3	0.0889739	0.404544	0.271	0.23	1
Msl1	0.0891547	-0.10667	0.159	0.2	1
Eps15l1	0.0892104	-0.101156	0.076	0.11	1
Sephs2	0.0892129	-0.0735087	0.159	0.207	1
Scaf8	0.0892495	-0.150385	0.103	0.139	1
Exoc2	0.0893131	0.0784267	0.206	0.162	1
Cmtm7	0.0893919	0.194309	0.553	0.514	1
Rbm39	0.0895462	-0.135727	0.941	0.956	1
Iqgap1	0.0896629	0.116439	0.724	0.667	1
Gimap4	0.0898668	-0.123568	0.868	0.88	1
Naa15	0.0899145	-0.179993	0.25	0.294	1
Stap1	0.089954	0.0707267	0.356	0.294	1
Hnrnpm	0.0900056	-0.142195	0.515	0.549	1
Psmb7	0.0900459	0.11487	0.465	0.411	1
Limd1	0.0901665	-0.115044	0.209	0.254	1
Crbn	0.0902291	-0.0821995	0.429	0.493	1
Acin1	0.0903936	0.10355	0.547	0.502	1
Mrps30	0.0905376	-0.032278	0.076	0.111	1
Tmem189	0.090578	0.10102	0.238	0.188	1
Sh3glb1	0.0908355	-0.117762	0.638	0.693	1
Mospd3	0.0908489	-0.0786372	0.126	0.167	1
Chmp3	0.09087	-0.136244	0.247	0.293	1
Ngdn	0.0913494	-0.0527903	0.241	0.298	1
Cd82	0.091498	-0.16294	0.521	0.563	1
Rap2c	0.0915552	0.109671	0.229	0.185	1
H3f3b	0.0918648	0.097069	0.997	0.984	1
Cfap97	0.0921002	-0.17235	0.118	0.153	1
Pias4	0.0921241	0.0904771	0.112	0.078	1
Nsrp1	0.0923969	-0.153596	0.2	0.249	1
Gmppa	0.0924117	0.0326147	0.109	0.075	1
Mindy3	0.092557	0.0587998	0.259	0.211	1
Drg2	0.0925605	-0.0973165	0.082	0.115	1
Tax1bp1	0.0930878	0.121785	0.626	0.598	1
1110008P14Rik	0.0931216	0.184484	0.482	0.418	1
Cep83	0.0932	-0.118885	0.121	0.16	1
Nup88	0.0932599	0.0804873	0.159	0.12	1
Atxn7l3	0.0932601	-0.0977433	0.109	0.146	1
Nup210	0.0933815	-0.142553	0.247	0.301	1
Ezh2	0.093411	-0.13935	0.209	0.258	1
Rnf145	0.093518	-0.150989	0.109	0.146	1
Rbl1	0.0937179	-0.143167	0.118	0.157	1
Il18rap	0.093732	0.151193	0.371	0.334	1
Hspa9	0.0938031	-0.155678	0.212	0.254	1
Ahsa1	0.0938513	-0.044522	0.262	0.307	1
Stk38	0.0938788	-0.134744	0.291	0.338	1
Psmg3	0.0939069	0.128088	0.156	0.12	1
Apbb1ip	0.0939318	-0.107126	0.521	0.591	1
Stard4	0.0939701	0.104501	0.162	0.124	1
Rpl9	0.094008	-0.0345636	0.997	0.99	1
Isg15	0.0941392	-0.21134	0.518	0.556	1
Itpkb	0.094151	-0.163008	0.421	0.474	1
Fam172a	0.094152	0.0757786	0.294	0.237	1
Kif2a	0.0942903	-0.144826	0.232	0.277	1
H2afy	0.094349	-0.102297	0.765	0.817	1
Slc35b2	0.094427	0.0528459	0.141	0.103	1
Mrps17	0.0944983	0.116402	0.368	0.308	1
Eif2b1	0.0947541	-0.054411	0.079	0.115	1
Oxr1	0.0948425	-0.0594162	0.124	0.166	1
Atp1a1	0.094923	0.0940544	0.341	0.287	1
H2afj	0.0949354	-0.144372	0.726	0.782	1
Smarcad1	0.0950837	0.0474257	0.185	0.141	1
Xpr1	0.0954694	-0.156873	0.147	0.185	1
Tnrc6a	0.0954836	-0.126336	0.324	0.371	1
Hmg20b	0.0955101	0.131102	0.241	0.193	1
Pqbp1	0.0957295	-0.102742	0.194	0.237	1
Clcn3	0.0958356	-0.0425741	0.179	0.23	1
Rsrc2	0.0959757	0.148209	0.574	0.523	1
Usmg5	0.0961091	-0.11173	0.629	0.702	1
Fam208b	0.0963197	-0.0684768	0.159	0.207	1
Ndufv2	0.0965055	0.130867	0.562	0.509	1
Mepce	0.096509	-0.0871664	0.118	0.157	1
Ei24	0.0968207	0.0496433	0.221	0.172	1
Parp14	0.0972419	0.122067	0.512	0.467	1
Rbbp7	0.0973064	-0.090297	0.312	0.366	1
Bccip	0.0977248	-0.0825066	0.297	0.352	1
Parvg	0.0977766	0.13432	0.235	0.19	1
Carnmt1	0.0979698	0.0893167	0.197	0.153	1
Wdr43	0.0982874	-0.12887	0.282	0.329	1
Ints6	0.0985457	0.138752	0.194	0.15	1
Ppp1r9b	0.0987153	-0.111424	0.132	0.174	1
1110004E09Rik	0.0988675	-0.0657997	0.085	0.12	1
Spcs3	0.0990346	0.0872863	0.241	0.195	1
Lck	0.0991003	-0.115004	0.85	0.897	1
Metrn	0.0991479	-0.108178	0.124	0.16	1
Asnsd1	0.099157	-0.113773	0.162	0.204	1
Cand1	0.0994306	-0.108368	0.082	0.115	1
Napa	0.0994317	-0.10001	0.221	0.265	1
Rpl32	0.0996081	-0.0545295	0.997	0.99	1
Chordc1	0.099653	-0.148565	0.335	0.382	1
Bri3bp	0.0997656	-0.0706116	0.135	0.174	1
Lat	0.0998567	-0.0799109	0.765	0.793	1
Cmpk2	0.0999351	-0.236283	0.115	0.15	1
Sbds	0.100365	0.0961166	0.318	0.272	1
Cish	0.100476	0.0926536	0.315	0.258	1
Tnpo1	0.100641	-0.0421716	0.138	0.183	1
Ttc37	0.100658	0.0956351	0.15	0.113	1
Ddit3	0.101129	-0.128989	0.212	0.258	1
Rnf11	0.101171	0.0661608	0.15	0.113	1
Ppm1h	0.101406	0.0726516	0.206	0.159	1
Ccl5	0.101648	0.447196	0.815	0.845	1
Atg12	0.101949	-0.0419167	0.2	0.253	1
Aes	0.101968	0.14259	0.868	0.897	1
Cops8	0.102069	-0.0831612	0.168	0.214	1
Pacs1	0.102228	-0.0983778	0.129	0.167	1
Elmo1	0.102309	-0.101474	0.324	0.38	1
Lbr	0.102495	-0.117402	0.376	0.429	1
Arhgap1	0.102577	-0.0462066	0.106	0.145	1
Cln3	0.102708	0.0378776	0.188	0.146	1
Rnf10	0.102833	-0.163777	0.335	0.378	1
Rpl13	0.102875	-0.0654241	0.991	0.997	1
Mrps10	0.1029	-0.0991878	0.135	0.174	1
Rpl26	0.103118	-0.0634163	0.974	0.974	1
Thap3	0.103235	-0.0466554	0.294	0.352	1
Alkbh6	0.103362	0.0821563	0.129	0.096	1
Srsf7	0.103554	0.159825	0.421	0.382	1
Dnajc21	0.10357	-0.174603	0.206	0.242	1
Paf1	0.103682	-0.0843768	0.109	0.145	1
Golga5	0.103702	-0.0710232	0.071	0.101	1
Atxn7	0.103952	-0.0528432	0.138	0.181	1
Zfp511	0.103981	-0.0797741	0.203	0.251	1
Rcc2	0.104065	-0.0505256	0.153	0.195	1
Ap1s2	0.104266	0.094138	0.256	0.214	1
Fyb	0.10432	-0.108241	0.829	0.873	1
Abce1	0.104561	-0.0642955	0.153	0.195	1
Slamf1	0.104848	-0.12132	0.235	0.284	1
Rap1gds1	0.104862	-0.0459774	0.15	0.195	1
Eif1a	0.105339	-0.189734	0.226	0.267	1
Rb1cc1	0.105422	-0.148467	0.215	0.26	1
Helz2	0.105628	-0.113793	0.159	0.206	1
Xab2	0.105689	-0.0948815	0.074	0.105	1
Zpr1	0.105742	-0.0617836	0.141	0.185	1
Dlat	0.105822	-0.0626184	0.109	0.15	1
Unc50	0.106013	0.0697846	0.274	0.22	1
Pin4	0.106531	-0.0891241	0.4	0.448	1
Rnmt	0.106862	0.0690036	0.185	0.145	1
Pigx	0.107145	0.1366	0.374	0.321	1
Pxn	0.107258	0.0828234	0.144	0.108	1
Zmiz1	0.107307	0.0531064	0.268	0.216	1
Rrp1	0.107663	-0.103994	0.415	0.467	1
4932438A13Rik	0.107844	-0.121838	0.368	0.422	1
Ankhd1	0.108487	-0.13467	0.168	0.204	1
Wnk1	0.108776	0.110141	0.735	0.746	1
Izumo4	0.108938	0.0868979	0.206	0.164	1
Fbxo28	0.109064	-0.111629	0.106	0.143	1
Ets1	0.109422	-0.0680534	0.794	0.817	1
Med17	0.109544	-0.0678259	0.079	0.113	1
Gstp1	0.109647	0.0755419	0.141	0.106	1
Epb41	0.109964	-0.1419	0.271	0.312	1
Mtx2	0.109966	0.0719824	0.135	0.101	1
Mapre2	0.110035	0.104317	0.209	0.171	1
Ctu2	0.110363	-0.0674884	0.103	0.139	1
Kansl1	0.110726	0.10202	0.424	0.369	1
Cers2	0.110927	0.139958	0.359	0.314	1
Ing4	0.110943	-0.107834	0.194	0.235	1
Trpm7	0.111114	-0.148948	0.203	0.246	1
Pdcd6ip	0.111457	0.0876546	0.497	0.448	1
Hspa13	0.111568	0.0461628	0.1	0.07	1
Ubr2	0.111709	0.07179	0.235	0.192	1
Pkp3	0.111748	0.150628	0.418	0.385	1
Mid1ip1	0.111785	-0.0986612	0.076	0.11	1
Fam192a	0.112173	-0.115438	0.224	0.265	1
Hars	0.112177	0.0853769	0.179	0.141	1
Dcun1d1	0.112468	-0.101808	0.188	0.232	1
Col4a3bp	0.112506	-0.00123238	0.265	0.216	1
Snapin	0.112562	0.0336557	0.112	0.078	1
Cox7c	0.112568	0.0866262	0.915	0.901	1
Gm2a	0.112569	-0.0625872	0.279	0.331	1
Tmem30a	0.112575	0.0891696	0.465	0.423	1
Arl6ip1	0.112607	0.106247	0.809	0.847	1
Vps36	0.11276	-0.108171	0.347	0.404	1
Tnfaip8l2	0.112791	-0.100698	0.318	0.368	1
Aftph	0.113095	0.148057	0.262	0.225	1
Hsdl2	0.113132	-0.0973416	0.126	0.162	1
Fosb	0.11326	-0.241392	0.638	0.662	1
Ftl1-ps1	0.113384	-0.00562567	0.076	0.11	1
Vamp7	0.113461	0.0745638	0.191	0.148	1
Taf1	0.113495	0.126827	0.218	0.176	1
Rexo2	0.113502	-0.155018	0.556	0.578	1
Itsn2	0.113508	-0.137574	0.262	0.303	1
Pitpnb	0.113668	-0.119146	0.185	0.225	1
Max	0.113725	-0.0849782	0.335	0.39	1
Hypk	0.113755	-0.0640372	0.424	0.472	1
Cnot1	0.113816	0.0621206	0.303	0.251	1
Zzef1	0.113857	0.125752	0.15	0.115	1
Cops4	0.114011	0.107071	0.291	0.247	1
Psmd3	0.114205	-0.10969	0.256	0.298	1
Hist1h2be	0.114327	-0.0822187	0.124	0.164	1
Psmc4	0.114544	-0.107734	0.385	0.441	1
2210016L21Rik	0.114788	-0.16299	0.182	0.223	1
Unc13d	0.114961	0.0720046	0.212	0.166	1
Pmaip1	0.115086	0.0363459	0.144	0.106	1
Smim8	0.11533	-0.0937531	0.141	0.179	1
Serhl	0.115379	0.0112075	0.109	0.077	1
Tmem183a	0.11573	0.0347347	0.132	0.098	1
Eif1ad	0.11577	-0.107212	0.191	0.232	1
Fzr1	0.11643	0.0547919	0.121	0.087	1
Utp18	0.116496	-0.0853632	0.165	0.207	1
Phax	0.116551	-0.122129	0.271	0.315	1
Eif4e2	0.116604	-0.0513908	0.447	0.498	1
Gnptg	0.116775	0.0798171	0.253	0.211	1
Mast3	0.116841	0.0104761	0.179	0.138	1
Isca2	0.117198	0.0342789	0.262	0.211	1
B4galt7	0.117559	-0.0508159	0.109	0.143	1
Arl5a	0.117743	0.173747	0.241	0.197	1
Elf1	0.117835	-0.103669	0.688	0.728	1
Arl8b	0.117969	-0.0998876	0.129	0.166	1
9030025P20Rik	0.118073	0.0968791	0.1	0.071	1
Alg5	0.11812	0.0467665	0.338	0.28	1
Gstt2	0.118269	0.0582349	0.174	0.134	1
Nmd3	0.118296	0.0675956	0.232	0.185	1
Dgka	0.118332	-0.0812729	0.297	0.345	1
Gpsm3	0.118353	-0.0848403	0.688	0.753	1
Chmp2b	0.118565	0.0957223	0.182	0.145	1
Il4ra	0.118627	-0.0841956	0.109	0.145	1
Ms4a6b	0.119384	-0.0752828	0.953	0.969	1
Cdc5l	0.119584	0.0907521	0.429	0.376	1
Rexo5	0.120049	0.117944	0.121	0.089	1
Commd9	0.120204	0.0561911	0.106	0.075	1
Il2	0.120497	-0.117369	0.109	0.143	1
Dennd1c	0.120519	-0.048936	0.147	0.192	1
Sdhb	0.120542	0.0937768	0.526	0.477	1
Dock10	0.120797	0.078521	0.594	0.556	1
Mien1	0.120826	0.12176	0.559	0.524	1
Zfand5	0.120969	0.0344629	0.335	0.28	1
Lrpap1	0.121135	-0.108136	0.188	0.228	1
Dap	0.121291	0.066291	0.421	0.362	1
Ylpm1	0.121308	-0.126481	0.126	0.162	1
Fam8a1	0.121497	0.0421427	0.103	0.073	1
Atp5e	0.121631	0.0723182	0.947	0.949	1
Cep350	0.121763	-0.129045	0.224	0.261	1
Tcf12	0.122259	-0.167436	0.235	0.282	1
Setdb2	0.12247	-0.0630553	0.079	0.111	1
Gskip	0.122843	0.0641914	0.194	0.155	1
Dkc1	0.123125	-0.070547	0.218	0.26	1
Rbms1	0.123276	0.108199	0.5	0.479	1
Erh	0.123329	0.0934537	0.403	0.347	1
Agpat2	0.123454	0.0583171	0.112	0.08	1
Dhx16	0.123559	0.0498317	0.15	0.115	1
Atp6v1d	0.123709	-0.0889534	0.324	0.361	1
Fam53a	0.124087	-0.0809624	0.138	0.178	1
Cuedc2	0.12423	0.0795385	0.332	0.28	1
Sf3b4	0.124259	-0.0099925	0.147	0.192	1
Eif4e3	0.124647	0.0731667	0.174	0.136	1
Tex10	0.124673	-0.0318976	0.106	0.143	1
Isyna1	0.124779	-0.0462185	0.138	0.178	1
Adprh	0.124877	-0.111756	0.244	0.282	1
Gzmk	0.125043	-0.169236	0.312	0.355	1
Jak3	0.125048	-0.153807	0.162	0.197	1
Creld2	0.125135	0.130864	0.147	0.113	1
Mcrs1	0.125341	0.0658104	0.156	0.117	1
Arhgap26	0.125629	-0.105753	0.168	0.209	1
Mogs	0.125885	-0.0761864	0.132	0.171	1
Stx17	0.126314	0.0801919	0.138	0.106	1
Rab9	0.126424	0.063633	0.197	0.157	1
Phb	0.126914	-0.0559317	0.203	0.254	1
Ski	0.127021	-0.0855714	0.126	0.164	1
Baz1a	0.127322	0.135515	0.485	0.443	1
Msn	0.127398	-0.100184	0.829	0.873	1
Parp9	0.127419	-0.162497	0.276	0.315	1
Cox7a2l	0.127534	-0.0929842	0.856	0.854	1
Matr3	0.127622	-0.123354	0.432	0.483	1
Ywhah	0.127738	0.108544	0.576	0.547	1
Bbx	0.127753	-0.0228835	0.203	0.246	1
Tsc22d2	0.127991	0.0802285	0.176	0.138	1
Mrps35	0.128267	-0.0728928	0.179	0.221	1
Sp1	0.128451	-0.0788985	0.121	0.159	1
Zgpat	0.128493	0.0566841	0.197	0.157	1
Ar	0.128691	-0.0952437	0.182	0.223	1
Pum2	0.128724	-0.0206636	0.309	0.366	1
Cisd3	0.12894	-0.0434448	0.076	0.108	1
Gnl1	0.128985	0.0131821	0.168	0.131	1
Phc2	0.129067	-0.113577	0.238	0.277	1
Atp13a1	0.129128	-0.044994	0.074	0.105	1
Plxnc1	0.129184	-0.127115	0.082	0.111	1
Usp5	0.129441	0.0724688	0.109	0.08	1
Dph6	0.129691	-0.0905522	0.091	0.122	1
Ndufaf3	0.129749	0.15712	0.232	0.195	1
Sel1l	0.129855	0.0126893	0.15	0.111	1
Elk3	0.129878	0.0899173	0.259	0.218	1
Sertad3	0.130039	-0.0099302	0.074	0.105	1
Mis18a	0.130074	-0.0912968	0.079	0.11	1
Higd2a	0.130209	0.149157	0.535	0.498	1
Echs1	0.130266	-0.0746761	0.174	0.213	1
Sp4	0.130274	-0.0928194	0.165	0.207	1
Mrpl10	0.13029	0.00822677	0.138	0.103	1
Dbf4	0.130373	-0.00558199	0.121	0.16	1
Aup1	0.130484	0.0571036	0.374	0.324	1
Cdc123	0.130556	-0.11314	0.256	0.3	1
Pknox1	0.130602	-0.111225	0.082	0.113	1
Ptpre	0.130688	0.0516802	0.206	0.162	1
Ogfr	0.130733	-0.0841178	0.321	0.364	1
Zfp664	0.130812	-0.0901058	0.097	0.129	1
Lrrc8c	0.130862	0.0580515	0.297	0.249	1
Mak16	0.131035	0.0816033	0.259	0.218	1
Acadl	0.131459	0.0813661	0.432	0.383	1
Klhdc4	0.131668	0.0827507	0.191	0.153	1
Tpi1	0.13226	0.114666	0.594	0.551	1
Atm	0.132373	-0.0942633	0.159	0.2	1
Ric8a	0.132461	0.113681	0.229	0.19	1
H2afv	0.132564	0.110135	0.541	0.503	1
Aven	0.132591	-0.069197	0.115	0.152	1
Zfp622	0.132829	-0.0935981	0.229	0.268	1
Thy1	0.132832	-0.0629374	0.876	0.911	1
Atl3	0.132976	0.141272	0.135	0.105	1
Cpox	0.132986	0.0432465	0.135	0.101	1
Cdk9	0.133004	-0.0530011	0.241	0.286	1
Ddx55	0.133261	-0.0866106	0.126	0.162	1
Mov10	0.133397	-0.0850785	0.097	0.127	1
Cdt1	0.134155	-0.0531971	0.085	0.115	1
Flot1	0.134307	-0.048524	0.176	0.218	1
Calu	0.134322	-0.123814	0.141	0.174	1
Sipa1l1	0.134363	-0.19112	0.294	0.326	1
Inpp1	0.134377	-0.161475	0.238	0.272	1
Ranbp2	0.134426	0.101593	0.403	0.357	1
Suz12	0.134471	-0.0494253	0.297	0.354	1
Elf2	0.134502	-0.134194	0.256	0.294	1
Slc9a9	0.134716	-0.11698	0.112	0.146	1
Smdt1	0.134834	0.12026	0.676	0.638	1
Crot	0.135259	-0.107033	0.244	0.291	1
Emp3	0.135298	-0.010808	0.665	0.725	1
Hltf	0.135459	0.0454607	0.244	0.2	1
Kcmf1	0.135801	-0.0931765	0.215	0.256	1
Ddi2	0.136224	0.0153903	0.112	0.08	1
Tmem135	0.136293	0.0858554	0.135	0.101	1
Ssr1	0.136583	0.150965	0.326	0.289	1
Ubr3	0.136887	0.0685374	0.118	0.087	1
Snrnp200	0.136929	-0.0998412	0.159	0.193	1
Srcap	0.137177	-0.0663254	0.076	0.108	1
Srm	0.137316	0.100787	0.106	0.078	1
Oxa1l	0.137347	-0.0909402	0.191	0.235	1
Satb1	0.137459	-0.172211	0.326	0.373	1
Mrps18c	0.137606	0.112509	0.479	0.443	1
Timm44	0.137635	-0.14241	0.153	0.185	1
Nup54	0.137639	0.0620037	0.141	0.106	1
Stat3	0.137768	0.108357	0.474	0.422	1
Abhd17b	0.137922	-0.0169968	0.118	0.155	1
Ikzf2	0.137974	0.191603	0.253	0.204	1
Ctdspl2	0.138631	0.0732393	0.241	0.197	1
Ubl7	0.138762	-0.0406472	0.1	0.134	1
Zfp36l1	0.138853	-0.133318	0.482	0.523	1
Mfsd10	0.138867	0.0681205	0.159	0.124	1
Rars	0.139117	-0.0628827	0.179	0.22	1
Psmf1	0.139346	-0.118808	0.106	0.138	1
Elovl1	0.139695	0.0637077	0.194	0.155	1
Polr2m	0.139722	-0.10517	0.344	0.378	1
Hmgb2	0.139851	-0.171861	0.853	0.882	1
Morf4l1	0.13995	0.117832	0.768	0.761	1
Ube2j1	0.140039	-0.0266794	0.15	0.193	1
Fam96b	0.140373	0.191106	0.441	0.401	1
Hist2h2ac	0.140556	-0.138675	0.121	0.153	1
Tnip1	0.140842	-0.0625222	0.109	0.145	1
Wdr46	0.141118	-0.0743751	0.112	0.146	1
Soat1	0.141267	0.0523579	0.206	0.166	1
Pycr2	0.141507	-0.161254	0.262	0.301	1
Bcl2	0.141761	-0.114551	0.656	0.72	1
Hdhd2	0.141933	-0.0575365	0.088	0.118	1
Znrf1	0.141937	-0.1502	0.174	0.206	1
Lrba	0.142049	0.10533	0.147	0.115	1
Clta	0.142171	0.0960828	0.829	0.812	1
Dnmt1	0.142396	0.0833843	0.244	0.204	1
Pgrmc1	0.142879	0.118269	0.274	0.235	1
Rspry1	0.143027	-0.0519468	0.138	0.174	1
Fam133b	0.143219	0.123323	0.385	0.354	1
Gm5617	0.143285	-0.0363284	0.079	0.11	1
Man1a	0.143318	0.113201	0.238	0.2	1
Dctn4	0.143413	0.0478208	0.282	0.237	1
Skap1	0.143545	-0.082228	0.829	0.85	1
Vezf1	0.143587	-0.0980626	0.185	0.223	1
Aebp2	0.143588	-0.109883	0.412	0.46	1
Brk1	0.143742	0.129634	0.691	0.652	1
Rap2a	0.143906	0.0857062	0.153	0.118	1
Rnaseh1	0.143954	-0.0641703	0.085	0.117	1
Sec31a	0.144005	0.0645395	0.203	0.167	1
Gltp	0.144371	0.0823816	0.359	0.314	1
Map2k2	0.144852	-0.0728722	0.429	0.481	1
Nrbf2	0.144948	-0.109297	0.171	0.206	1
Isg20	0.145144	-0.261641	0.379	0.402	1
Mterf3	0.145315	-0.108915	0.118	0.153	1
Gmfb	0.145367	-0.0466696	0.279	0.328	1
Tbc1d10b	0.145371	-0.11581	0.097	0.127	1
Aimp1	0.145566	-0.0802984	0.521	0.561	1
Ppm1j	0.145812	0.066868	0.162	0.125	1
Ubl3	0.146209	-0.100021	0.329	0.369	1
Lamtor5	0.146571	0.126046	0.518	0.491	1
Il27ra	0.146658	0.0727349	0.4	0.345	1
Sacs	0.146729	0.0684768	0.115	0.085	1
Fchsd2	0.146759	-0.0681931	0.185	0.223	1
Ythdc1	0.146867	0.109656	0.462	0.418	1
Gzma	0.146927	0.337548	0.168	0.214	1
Lgalsl	0.146946	0.0861502	0.112	0.082	1
Elovl5	0.14704	-0.0857692	0.121	0.157	1
Sap30l	0.147447	-0.0521712	0.306	0.354	1
Mknk2	0.147473	-0.077346	0.309	0.354	1
Os9	0.147703	0.130445	0.453	0.404	1
Zfp445	0.148141	0.0701332	0.203	0.164	1
Gdi1	0.148363	0.0378159	0.176	0.141	1
Fus	0.148451	-0.142384	0.679	0.732	1
Trip12	0.148542	0.0845967	0.406	0.348	1
Fam92a	0.148669	0.0822524	0.265	0.23	1
Mcm6	0.148865	-0.0740238	0.162	0.199	1
Nadk	0.148962	-0.10165	0.159	0.195	1
Rnf6	0.148975	-0.122558	0.209	0.253	1
Dnajc19	0.14915	0.0811887	0.421	0.383	1
Stk4	0.149303	-0.0819074	0.474	0.53	1
Med15	0.149574	0.108802	0.235	0.195	1
Alyref	0.149617	0.0820739	0.359	0.317	1
Lman2	0.149617	0.116495	0.55	0.507	1
Phf12	0.149655	-0.12852	0.121	0.153	1
Dnajc13	0.149807	0.0866289	0.168	0.134	1
Nme2	0.149885	-0.0618882	0.259	0.301	1
Dusp2	0.149967	0.156704	0.653	0.606	1
Mpc1	0.15023	0.0843411	0.426	0.389	1
Ndufa9	0.150315	-0.0892886	0.276	0.317	1
Cyhr1	0.150321	0.0520912	0.224	0.185	1
Rpl35	0.150604	-0.0663681	0.944	0.949	1
Rchy1	0.150727	-0.119936	0.324	0.362	1
Psmb2	0.150842	0.102561	0.688	0.622	1
Ist1	0.150871	-0.0405366	0.126	0.162	1
Ssu72	0.15114	0.140627	0.571	0.535	1
Smim12	0.151306	-0.0961183	0.168	0.204	1
Eny2	0.151378	-0.106801	0.438	0.49	1
Rcn1	0.151522	0.114083	0.297	0.256	1
Crcp	0.15184	-0.0900871	0.129	0.164	1
Map3k2	0.151991	-0.0885179	0.153	0.193	1
Bclaf1	0.152	-0.17235	0.432	0.46	1
Gm19585	0.15225	0.0561523	0.397	0.34	1
H2afz	0.152496	0.0848201	0.838	0.866	1
Tpm3-rs7	0.152864	0.104812	0.744	0.746	1
Oxsr1	0.152964	0.0631924	0.138	0.108	1
Znhit2	0.153112	-0.0314144	0.124	0.16	1
Mbd1	0.153622	0.0487012	0.126	0.094	1
Dtymk	0.153839	0.153738	0.306	0.268	1
Tspyl1	0.153907	-0.0947949	0.159	0.197	1
Endog	0.154068	-0.0200081	0.071	0.101	1
Prpf31	0.154151	0.1218	0.229	0.19	1
Rbm4b	0.154254	0.0634864	0.15	0.117	1
Eif6	0.15426	-0.0988335	0.45	0.484	1
Zbtb7a	0.154562	-0.137141	0.282	0.321	1
Dhrs7	0.154568	0.0751317	0.288	0.244	1
Mrpl42	0.154569	-0.120709	0.382	0.42	1
Dnajc10	0.154659	0.0935752	0.165	0.131	1
Kpna3	0.154866	0.0556993	0.162	0.127	1
Mrpl49	0.155066	-0.104306	0.153	0.188	1
Suclg2	0.155179	0.06797	0.141	0.11	1
Ppp3ca	0.15552	0.103467	0.374	0.322	1
Vsir	0.155851	-0.135857	0.382	0.429	1
Thoc7	0.156121	-0.0779387	0.415	0.456	1
Eif4enif1	0.156262	0.0793499	0.206	0.167	1
Nxf1	0.156371	0.234873	0.385	0.348	1
Ankrd40	0.156556	0.116183	0.185	0.153	1
Flad1	0.156583	0.0727745	0.15	0.117	1
Plin2	0.156845	0.122751	0.118	0.089	1
Arhgef1	0.157102	-0.0799415	0.629	0.679	1
Mtmr1	0.1572	0.0803792	0.194	0.159	1
Ncoa7	0.157227	-0.183487	0.306	0.34	1
Plekha2	0.15742	-0.106983	0.226	0.263	1
Golt1b	0.157784	0.0612372	0.141	0.11	1
Wdr83os	0.157797	0.0810985	0.279	0.242	1
Rsrc1	0.157819	-0.104332	0.235	0.274	1
Zcchc10	0.157934	-0.0965129	0.094	0.124	1
Med25	0.158459	-0.0694969	0.082	0.11	1
Rbbp6	0.159254	-0.112045	0.376	0.411	1
Ide	0.159445	0.0377015	0.244	0.2	1
Tmed10	0.159858	0.123317	0.535	0.493	1
Med8	0.15986	0.0703647	0.294	0.249	1
Lpp	0.160022	-0.0962222	0.165	0.199	1
Eef1akmt1	0.160289	0.0607644	0.229	0.185	1
Farsb	0.160323	0.0623135	0.156	0.122	1
Mtif3	0.160388	-0.0801946	0.106	0.138	1
S100a13	0.160518	0.0733092	0.874	0.847	1
Atp5b	0.160583	-0.0508708	0.853	0.878	1
Msh3	0.160772	-0.104634	0.085	0.113	1
Fmr1	0.160779	-0.0565008	0.212	0.253	1
Dld	0.160832	-0.0632419	0.168	0.209	1
0610030E20Rik	0.161064	-0.120088	0.138	0.172	1
Tmem71	0.161106	-0.178888	0.315	0.352	1
Ppif	0.161127	-0.0652179	0.082	0.11	1
Arpc4	0.161149	0.118822	0.768	0.767	1
Ptbp1	0.161275	-0.0845778	0.294	0.341	1
Noa1	0.161319	-0.108703	0.085	0.11	1
Ciao1	0.161832	-0.0630316	0.129	0.164	1
Uba6	0.162501	0.0178835	0.132	0.101	1
Phf11c	0.162627	-0.0993255	0.247	0.289	1
P4ha1	0.162903	0.0619193	0.191	0.155	1
Psip1	0.16297	-0.109832	0.388	0.437	1
Nop56	0.163168	-0.12101	0.326	0.364	1
Hes6	0.163321	0.0849002	0.241	0.202	1
Gtf3c2	0.163442	-0.0410109	0.094	0.125	1
Gpatch2	0.163901	-0.141568	0.094	0.122	1
Orc6	0.164443	-0.0959885	0.115	0.145	1
Ppie	0.164469	0.0570258	0.247	0.207	1
Vapa	0.16449	0.103175	0.468	0.425	1
Ndufa8	0.164652	0.132146	0.544	0.516	1
Rhoh	0.164719	-0.0719198	0.7	0.761	1
Pex13	0.164753	-0.0692464	0.103	0.132	1
Ppdpf	0.165318	0.10893	0.453	0.401	1
Tufm	0.165583	-0.0619264	0.1	0.131	1
Rps3a1	0.165676	-0.0458096	0.994	0.99	1
Pinx1	0.166353	-0.062532	0.082	0.111	1
Gmip	0.166377	-0.0933928	0.176	0.213	1
Slc25a51	0.16641	0.108434	0.112	0.085	1
Klhl24	0.166416	-0.0995347	0.209	0.253	1
Zbp1	0.166514	-0.183068	0.632	0.667	1
Lta4h	0.166579	-0.0958449	0.144	0.178	1
Tssc4	0.16687	0.0567689	0.118	0.089	1
Cast	0.166899	0.0726562	0.474	0.436	1
Ramp1	0.167312	0.123511	0.221	0.181	1
Asah1	0.16756	0.0404542	0.118	0.089	1
Il18r1	0.167595	-0.0910209	0.462	0.528	1
Brd9	0.167819	-0.054451	0.268	0.307	1
Hint3	0.168039	-0.0878334	0.244	0.279	1
Mrpl30	0.168459	-0.118815	0.618	0.646	1
Paip1	0.16851	0.0586825	0.147	0.117	1
Rpa1	0.168646	-0.0819936	0.168	0.2	1
Rnf34	0.169045	0.0429345	0.15	0.117	1
Eloc	0.169188	0.121656	0.606	0.577	1
Fubp1	0.169354	0.0655164	0.529	0.491	1
Tbc1d2b	0.169821	0.0133253	0.103	0.075	1
Stk40	0.169874	0.0481503	0.15	0.117	1
Coa5	0.169973	0.072262	0.215	0.179	1
Susd6	0.170002	-0.113052	0.141	0.172	1
Fam45a	0.170045	0.111723	0.124	0.096	1
Ipcef1	0.170256	-0.0909163	0.229	0.265	1
Nedd4	0.170499	0.0549338	0.194	0.157	1
Prelid2	0.170787	-0.126501	0.285	0.328	1
Tpp2	0.171266	-0.112503	0.371	0.416	1
Pdia4	0.171342	-0.0787469	0.238	0.277	1
Mrps7	0.171456	-0.0800763	0.206	0.24	1
Ifi47	0.171483	-0.140922	0.618	0.659	1
Xiap	0.171501	0.0810807	0.274	0.235	1
Ptpn18	0.171553	0.0502256	0.959	0.956	1
Foxj3	0.171861	-0.0295819	0.076	0.105	1
Safb2	0.172547	0.0651031	0.229	0.192	1
Snu13	0.172917	0.167302	0.621	0.584	1
Ifi208	0.17324	-0.167722	0.415	0.437	1
Eif3m	0.173256	-0.0962188	0.756	0.772	1
Mxd1	0.173319	-0.0105207	0.247	0.293	1
Actr1b	0.173338	0.088275	0.153	0.122	1
Aco2	0.173338	-0.0471931	0.271	0.312	1
Pik3r1	0.173481	0.0873952	0.356	0.319	1
Trp53i11	0.173677	0.0196438	0.15	0.115	1
Sh3bp1	0.174273	-0.0979106	0.206	0.246	1
Aqr	0.174344	-0.146396	0.238	0.275	1
Tmem199	0.174506	0.0744036	0.115	0.089	1
Ccny	0.174821	-0.0517675	0.132	0.167	1
Uqcrb	0.174832	0.123587	0.682	0.648	1
Tln1	0.17507	0.0789492	0.768	0.768	1
Wdr18	0.175168	0.100903	0.182	0.148	1
Asb6	0.175258	0.0550068	0.112	0.084	1
Lnpk	0.175478	0.0333774	0.129	0.099	1
Tiparp	0.175502	0.0467576	0.109	0.082	1
Gadd45b	0.175935	0.412637	0.221	0.193	1
Cs	0.176296	-0.0343675	0.218	0.258	1
Pigyl	0.176553	0.0767016	0.206	0.171	1
Thumpd3	0.176615	-0.0875911	0.162	0.197	1
Trpc4ap	0.17668	-0.0484959	0.188	0.23	1
Ebp	0.176868	-0.0358217	0.456	0.517	1
Bcl9l	0.176967	-0.0109855	0.1	0.131	1
Jmjd6	0.177848	-0.146394	0.215	0.246	1
Txlna	0.178477	0.0422247	0.174	0.138	1
Phf11b	0.178502	-0.173237	0.574	0.594	1
Gm26825	0.178559	-0.162504	0.429	0.477	1
Ttc1	0.178611	0.0651279	0.282	0.242	1
Smim4	0.179032	-0.0526536	0.209	0.249	1
Phf11a	0.179055	-0.167249	0.215	0.247	1
Lrp6	0.179094	-0.0493751	0.082	0.111	1
Ptpn7	0.179134	0.111933	0.347	0.315	1
Zyg11b	0.179449	-0.146624	0.132	0.159	1
Fam60a	0.179851	0.0860856	0.218	0.178	1
Phf20	0.180166	-0.10332	0.182	0.218	1
Pfdn1	0.180177	0.0475544	0.435	0.382	1
Ttc39c	0.180348	-0.0913446	0.138	0.171	1
Atxn10	0.18086	0.0505089	0.268	0.226	1
Uap1l1	0.180905	0.0738711	0.106	0.08	1
Stag2	0.181018	0.100593	0.359	0.322	1
Gle1	0.181134	-0.0592562	0.129	0.162	1
Tomm5	0.181209	0.124457	0.529	0.503	1
Rcn2	0.18142	0.0492777	0.144	0.113	1
Eva1b	0.181541	0.10235	0.426	0.39	1
Mpv17l2	0.181782	-0.0259176	0.118	0.152	1
Phgdh	0.18192	-0.0484909	0.274	0.319	1
Gimap1	0.182043	-0.123193	0.771	0.829	1
Srek1	0.182678	0.0773181	0.235	0.195	1
Stat4	0.182767	-0.0639188	0.459	0.505	1
Zfp746	0.182769	-0.0986156	0.091	0.118	1
Rpl27-ps3	0.182842	0.0733376	0.235	0.197	1
Gart	0.182881	-0.0566963	0.082	0.11	1
Vasp	0.183004	-0.102361	0.782	0.791	1
Rassf2	0.183016	-0.0383561	0.156	0.192	1
Rex1bd	0.183255	0.105669	0.488	0.448	1
Inpp5k	0.183391	-0.089648	0.182	0.214	1
Sat1	0.183974	0.120808	0.571	0.544	1
Gns	0.18404	0.0573357	0.1	0.075	1
Dnajb4	0.184109	-0.0522291	0.076	0.103	1
Rab1b	0.18422	0.0674775	0.365	0.315	1
Mctp2	0.184257	0.070923	0.218	0.183	1
Wipi2	0.184323	-0.0768466	0.097	0.125	1
Casp7	0.184399	0.0721479	0.103	0.077	1
Supt5	0.184427	-0.107768	0.262	0.3	1
Ppp1r12c	0.184484	0.065959	0.209	0.169	1
Ddx27	0.184638	0.146857	0.238	0.209	1
Bmi1	0.185287	0.0705815	0.1	0.075	1
Dpy30	0.18584	0.0771573	0.371	0.333	1
Cog8	0.185855	-0.0465014	0.118	0.15	1
Slf1	0.186041	0.0342174	0.124	0.094	1
Ran	0.186171	-0.0387863	0.726	0.768	1
Arfgef1	0.186317	-0.142579	0.209	0.244	1
Rwdd1	0.186328	0.073029	0.7	0.681	1
Lancl1	0.186361	0.0298976	0.103	0.075	1
Snx6	0.186363	0.0596869	0.397	0.35	1
Rngtt	0.186546	-0.133724	0.153	0.183	1
Exoc1	0.186586	0.0241763	0.126	0.098	1
Npm3	0.186735	-0.0918713	0.468	0.505	1
Slain1	0.186736	-0.089373	0.124	0.157	1
Glrx	0.186797	0.106051	0.518	0.493	1
Cbfb	0.186809	0.120052	0.274	0.237	1
Zbtb25	0.18687	-0.0673442	0.147	0.183	1
Fam58b	0.187016	-0.0243905	0.124	0.159	1
Fndc3a	0.187116	0.120632	0.235	0.2	1
Tmem29	0.187138	0.0328541	0.115	0.087	1
Bsg	0.187396	0.160637	0.618	0.606	1
Mapk3	0.187427	0.106875	0.224	0.188	1
Mrgbp	0.187447	-0.00264853	0.126	0.162	1
Lax1	0.187454	-0.0869419	0.174	0.207	1
Terf2ip	0.187495	0.0668832	0.124	0.098	1
Azin1	0.187612	0.00771686	0.265	0.22	1
Cd9	0.187777	-0.00307327	0.135	0.171	1
Ifih1	0.187813	-0.121029	0.182	0.216	1
Malat1	0.187833	-0.0247906	1	0.998	1
Slc3a2	0.187866	-0.143657	0.615	0.674	1
Zdhhc18	0.188015	-0.115554	0.679	0.709	1
Ppp1r10	0.18805	-0.0649144	0.338	0.399	1
Kpnb1	0.188125	-0.0946446	0.194	0.228	1
Rnf114	0.188211	-0.0655707	0.379	0.423	1
Selplg	0.188501	-0.0926427	0.874	0.901	1
Ccdc32	0.188594	0.116815	0.224	0.186	1
Tnfrsf1b	0.188713	0.06604	0.218	0.181	1
Tusc3	0.188958	0.0700066	0.191	0.155	1
Naxe	0.189715	0.105909	0.241	0.209	1
Fam193a	0.190165	0.124835	0.185	0.159	1
Srd5a3	0.190274	0.0395447	0.132	0.105	1
Tpgs1	0.190283	-0.0803534	0.176	0.214	1
Supt6	0.190293	-0.10191	0.188	0.225	1
Glo1	0.190493	-0.0263441	0.497	0.545	1
Gpatch11	0.190778	-0.0785145	0.253	0.291	1
Adprhl2	0.190819	-0.0736706	0.103	0.132	1
Cd200	0.190987	0.0444344	0.109	0.082	1
Ube2h	0.191123	-0.0667239	0.359	0.401	1
Ldah	0.191161	-0.095255	0.121	0.148	1
Csnk1d	0.191279	0.0966897	0.256	0.216	1
Metap2	0.191588	-0.079808	0.456	0.498	1
Cwc25	0.19166	0.103079	0.182	0.152	1
Washc3	0.19172	0.0757932	0.332	0.284	1
Uggt1	0.192037	-0.0801003	0.165	0.197	1
Tmem80	0.192131	-0.11337	0.076	0.101	1
Cebpg	0.192182	0.105107	0.132	0.105	1
Tspan3	0.192275	-0.000578112	0.132	0.167	1
Smg7	0.192295	0.0048527	0.121	0.15	1
Ppat	0.192311	0.0800319	0.15	0.118	1
Rbm25	0.192409	0.106541	0.679	0.683	1
Tab2	0.192501	-0.127257	0.338	0.383	1
Foxn2	0.192748	-0.0546388	0.171	0.207	1
Sms	0.19285	0.136518	0.515	0.472	1
Rhog	0.192854	0.116273	0.397	0.357	1
Rnaseh2c	0.19291	0.156448	0.435	0.404	1
Gna15	0.192975	-0.0256114	0.238	0.279	1
Hdac7	0.193214	-0.132876	0.176	0.209	1
Prrc2c	0.193722	-0.133854	0.797	0.8	1
Prpf40a	0.193993	-0.0985535	0.441	0.49	1
Ppt2	0.194312	0.0754617	0.115	0.087	1
Shkbp1	0.194331	0.0447739	0.118	0.091	1
[truncated: 3,556 more rows]

## Sheet: Cluster 8
	p_val	avg_log2FC	pct_high	pct.2_low	p_val_adj
Gm42418	3.37638e-28	-0.466132	1	1	3.94935e-24
Rps27rt	4.04438e-21	-0.478431	0.987	0.987	4.73071e-17
Rps21	1.4654e-16	-0.23289	1	1	1.71408e-12
Rps28	2.157e-15	-0.245833	1	0.997	2.52305e-11
Rps29	2.58161e-14	-0.200698	1	1	3.0197e-10
Fcer1g	2.91666e-14	0.790219	0.718	0.476	3.41162e-10
Rps27	5.75682e-14	-0.233545	1	1	6.73375e-10
Gm11808	1.22441e-12	-0.312656	0.991	0.981	1.43219e-08
Pdcd4	6.14121e-12	-0.528367	0.588	0.754	7.18338e-08
Prf1	7.12176e-11	0.533228	0.973	0.911	8.33032e-07
Nme1	1.01936e-09	0.371714	0.962	0.907	1.19235e-05
Ppia	1.3526e-09	0.200407	1	1	1.58214e-05
Cox5a	6.42222e-09	0.221454	0.996	0.987	7.51207e-05
Rps2	6.94371e-09	0.224713	1	0.997	8.12206e-05
Rpl39	1.11517e-08	-0.138942	0.998	1	0.000130441
Ran	1.53152e-08	0.22608	0.998	0.994	0.000179142
Actg1	1.97877e-08	0.232555	1	1	0.000231457
Tpt1	3.39296e-08	-0.115168	1	1	0.000396874
Cycs	4.0444e-08	0.290897	0.944	0.891	0.000473074
Tmsb10	5.60235e-08	-0.217553	1	1	0.000655307
4930523C07Rik	7.51215e-08	-0.301412	0.461	0.604	0.000878697
Eif5a	9.88502e-08	0.237946	0.993	0.994	0.00115625
1700097N02Rik	1.34617e-07	-0.352899	0.752	0.847	0.00157461
Sumo2	1.40658e-07	0.21494	0.991	0.965	0.00164528
Lars2	1.47985e-07	-0.320067	0.814	0.914	0.00173098
Gzmb	1.52433e-07	0.682608	0.957	0.895	0.00178301
Entpd1	1.91597e-07	0.22445	0.749	0.559	0.00224111
Zfp36l2	2.14464e-07	-0.430143	0.74	0.812	0.00250858
Vdac2	2.21755e-07	0.215799	0.971	0.942	0.00259387
Rps3a1	2.75008e-07	0.134183	1	1	0.00321677
B2m	3.4414e-07	-0.169907	1	1	0.00402541
Rpl15	4.38302e-07	0.15496	1	1	0.00512682
mt-Co3	4.86111e-07	-0.202779	1	1	0.00568604
Rpl37a	4.99919e-07	-0.124097	1	1	0.00584755
Irf8	5.61735e-07	0.324527	0.902	0.802	0.00657062
Sub1	6.79063e-07	0.182647	0.996	0.997	0.007943
Rpl13	6.86149e-07	0.125745	1	1	0.00802589
Gm10260	7.3919e-07	0.320844	0.85	0.709	0.0086463
H2-Q7	7.72829e-07	-0.256971	0.964	0.997	0.00903979
Ybx1	8.3442e-07	0.213842	1	0.987	0.00976021
Polr2c	9.27911e-07	0.216518	0.808	0.655	0.0108538
Crip1	9.45599e-07	-0.396722	0.989	0.994	0.0110607
Slc16a11	1.344e-06	0.365578	0.557	0.393	0.0157208
Nrgn	1.43084e-06	0.317868	0.922	0.821	0.0167365
Rpl9	1.50317e-06	0.125462	1	0.997	0.0175826
Ppa1	1.55948e-06	0.21936	0.747	0.594	0.0182413
Dut	1.5626e-06	0.321482	0.94	0.872	0.0182777
Pfn1	2.88922e-06	0.155672	1	1	0.0337953
Ldha	2.91289e-06	0.259722	0.991	0.981	0.0340721
Rpl38	3.32466e-06	-0.137716	0.998	1	0.0388886
Gm2682	3.49434e-06	-0.161813	0.04	0.131	0.0408733
Atp2a3	3.64771e-06	-0.219563	0.161	0.284	0.0426673
Ndufc2	3.83271e-06	0.211987	0.946	0.853	0.0448312
Slc25a4	4.19914e-06	0.170619	0.971	0.952	0.0491174
Cox7a2l	4.4263e-06	-0.236275	0.966	0.984	0.0517745
Rpl37	4.75518e-06	-0.127025	1	1	0.0556213
Mt1	4.81379e-06	0.543738	0.38	0.224	0.0563069
Ech1	5.43221e-06	0.204193	0.935	0.863	0.0635406
Ube2n	5.62687e-06	0.219251	0.859	0.764	0.0658175
Crmp1	6.19789e-06	-0.14234	0.067	0.169	0.0724967
Ly6e	6.59615e-06	-0.272766	0.993	0.99	0.0771551
AY036118	6.84016e-06	-0.270501	0.897	0.927	0.0800094
Ndufa8	7.26329e-06	0.184331	0.911	0.882	0.0849587
Rnaseh2a	7.90727e-06	0.158325	0.338	0.198	0.0924913
Bcl2a1b	8.18501e-06	0.25093	0.953	0.895	0.0957401
Atp5g1	8.41298e-06	0.216432	0.915	0.859	0.0984067
Hccs	8.42688e-06	0.155327	0.43	0.281	0.0985692
Cxcr3	9.89353e-06	-0.23044	0.072	0.173	0.115725
Glrx2	1.08338e-05	0.202149	0.629	0.486	0.126723
Capg	1.093e-05	0.244695	0.928	0.872	0.127848
Tnfrsf9	1.10463e-05	0.293186	0.915	0.859	0.129209
Btg1	1.12548e-05	-0.386959	0.969	0.981	0.131648
Uba52	1.32917e-05	-0.16635	0.998	0.997	0.155473
Laptm5	1.33019e-05	-0.21685	0.993	0.997	0.155592
Nop53	1.44336e-05	-0.244933	0.866	0.888	0.16883
Ndufab1	1.57465e-05	0.213023	0.872	0.77	0.184187
Ppp1r14b	1.60392e-05	0.248127	0.846	0.764	0.187611
Havcr2	1.78236e-05	0.24144	0.676	0.505	0.208482
Rbm39	2.01918e-05	-0.201486	0.991	0.99	0.236184
Wdr89	2.26781e-05	-0.220156	0.989	0.978	0.265266
Lockd	2.28292e-05	-0.324697	0.736	0.802	0.267034
Atp5j	2.48012e-05	0.168996	0.993	0.978	0.2901
Gm19585	2.55523e-05	-0.297047	0.805	0.808	0.298885
Rpl10-ps3	2.80973e-05	-0.23367	0.913	0.917	0.328655
Aurkaip1	2.84521e-05	0.175966	0.946	0.888	0.332804
Bcl2a1d	2.9009e-05	0.251671	0.922	0.882	0.339319
mt-Nd3	2.94283e-05	-0.302219	0.911	0.917	0.344222
Edf1	3.18896e-05	0.162209	0.991	0.971	0.373013
Ccl3	3.20954e-05	0.475544	0.667	0.546	0.37542
Hist1h4d	3.33265e-05	-0.274345	0.535	0.655	0.38982
Cwc15	3.39749e-05	-0.192595	0.917	0.955	0.397405
Erh	3.5291e-05	0.24493	0.787	0.735	0.412799
Spp1	3.53865e-05	0.330662	0.971	0.888	0.413916
Ablim1	3.61174e-05	-0.289657	0.671	0.78	0.422465
Eif4a1	3.78183e-05	0.181938	0.991	0.978	0.442361
Gimap4	3.89195e-05	-0.262968	0.966	0.958	0.455242
Rps4x	3.95361e-05	0.108255	1	1	0.462454
Ndufb7	4.32217e-05	0.142347	0.993	0.958	0.505565
Casp3	4.45851e-05	0.204172	0.94	0.843	0.521512
Rps27a	4.48164e-05	0.107111	1	1	0.524217
Cd69	4.52206e-05	-0.332457	0.649	0.732	0.528946
Nkg7	4.64964e-05	0.181814	0.998	1	0.543869
Rps15	4.75467e-05	-0.147069	1	1	0.556153
Ilkap	5.00337e-05	0.177861	0.602	0.463	0.585244
Lyar	5.29289e-05	0.205654	0.745	0.604	0.619109
Snrpd1	5.43613e-05	0.204102	0.953	0.882	0.635865
H2-D1	5.9743e-05	-0.127224	1	1	0.698814
Slc25a5	6.05096e-05	0.174503	0.993	0.965	0.707781
1810037I17Rik	6.06621e-05	0.171524	0.966	0.962	0.709564
Upk1a	6.14306e-05	0.125324	0.134	0.048	0.718554
Galk1	6.51211e-05	0.191354	0.416	0.284	0.761722
Snrpd2	6.71543e-05	0.147324	0.987	0.965	0.785503
Dap	7.02449e-05	-0.221548	0.964	0.971	0.821655
Dynlt3	7.76895e-05	0.180915	0.499	0.374	0.908734
Slfn2	7.80612e-05	-0.29571	0.689	0.805	0.913081
Trac	7.91312e-05	-0.169405	0.996	0.994	0.925598
Rpl11	8.07551e-05	0.0909504	1	1	0.944592
Rabggtb	8.20224e-05	0.172571	0.468	0.323	0.959416
Rps27l	8.53775e-05	0.172212	0.973	0.962	0.99866
Gimap3	8.59037e-05	-0.27033	0.846	0.853	1
Uqcrb	8.79521e-05	0.178778	0.946	0.927	1
Nhp2	9.14485e-05	0.224983	0.848	0.76	1
Timm17a	9.86866e-05	0.152372	0.763	0.633	1
Txn2	0.000103889	0.19128	0.799	0.7	1
Npm1	0.000113746	0.174942	0.993	0.99	1
Asns	0.000114471	0.16932	0.251	0.134	1
Coq7	0.000116318	0.135998	0.327	0.208	1
Etfa	0.000117229	0.150474	0.723	0.553	1
Gpsm3	0.000119568	-0.200342	0.902	0.942	1
Hnrnpa1	0.000120141	0.190772	0.98	0.962	1
Ranbp1	0.000128542	0.210215	0.919	0.866	1
Ybx3	0.00013074	0.143352	0.975	0.952	1
Pdia6	0.000135442	0.220977	0.949	0.895	1
Spn	0.000137849	-0.273436	0.644	0.725	1
Smcr8	0.000140915	-0.0856454	0.045	0.118	1
Anapc13	0.000141766	-0.234606	0.669	0.738	1
Crim1	0.000145079	-0.111052	0.04	0.112	1
Ptma	0.000145696	0.130298	1	1	1
Grap	0.000152366	-0.231839	0.644	0.732	1
Rpl8	0.00015853	0.0973771	1	1	1
Mrpl32	0.000162506	0.162793	0.823	0.696	1
Gm10076	0.000165118	0.228916	0.776	0.719	1
Dnajc19	0.000166083	0.151719	0.767	0.649	1
Rpl32	0.000169898	0.10358	1	1	1
Gpr183	0.000170093	-0.301023	0.387	0.498	1
Gcsh	0.000175249	0.12534	0.403	0.262	1
Tespa1	0.000181159	-0.109532	0.101	0.195	1
Pcbd2	0.000190275	0.134945	0.673	0.534	1
Hint1	0.000191243	0.129609	1	0.994	1
2410015M20Rik	0.00019517	0.179055	0.881	0.802	1
Pebp1	0.000219479	0.171306	0.913	0.879	1
Nudt21	0.000226411	0.162067	0.919	0.863	1
Ccl4	0.000227277	0.335982	0.834	0.744	1
Mrpl51	0.000238321	0.15855	0.826	0.696	1
Slc38a2	0.00024986	-0.286625	0.776	0.834	1
2700097O09Rik	0.000252404	0.102351	0.224	0.115	1
H2-T23	0.000261135	-0.191407	0.991	0.984	1
Ipcef1	0.000265872	-0.160057	0.239	0.355	1
Txnl4a	0.000271621	0.164006	0.781	0.684	1
Atp5c1	0.000278557	0.134643	1	0.978	1
Mrps24	0.000279479	0.179053	0.904	0.821	1
Snx3	0.000284493	0.146391	0.902	0.872	1
Fyn	0.000285076	-0.190088	0.568	0.681	1
Diaph1	0.000287366	-0.246657	0.776	0.812	1
Rsl1d1	0.000289276	0.16578	0.861	0.802	1
Gldc	0.000289449	0.182513	0.611	0.482	1
Btf3	0.000293426	0.107086	1	0.997	1
Nudt19	0.000296597	0.153035	0.432	0.307	1
Cinp	0.000302332	0.138441	0.315	0.204	1
Timm50	0.000309451	0.113407	0.49	0.342	1
Cyc1	0.00031666	0.170283	0.803	0.696	1
C1qbp	0.000329544	0.203194	0.761	0.649	1
Sdf2l1	0.000334216	0.19711	0.774	0.677	1
Ndufs4	0.00034284	0.139403	0.866	0.821	1
Rpl29	0.000351954	0.138801	0.423	0.291	1
Gfer	0.000362253	0.106311	0.257	0.147	1
Pik3c2a	0.00036706	-0.112928	0.148	0.246	1
Gimap8	0.000368545	-0.197833	0.555	0.639	1
Snrpg	0.000390375	-0.139171	0.996	0.994	1
Mrps14	0.000413752	0.159682	0.96	0.93	1
Siva1	0.000416954	0.188888	0.673	0.54	1
Mrpl12	0.000426799	0.169994	0.79	0.671	1
Vps37b	0.000426868	-0.266549	0.754	0.796	1
Ifng	0.000430625	0.344571	0.886	0.824	1
Dnajb11	0.000432985	0.16629	0.857	0.773	1
Wdr18	0.000435023	0.132305	0.412	0.288	1
Txndc9	0.000435428	0.145543	0.653	0.546	1
Mt2	0.000438169	0.129033	0.161	0.073	1
Apoo	0.000439136	0.0776837	0.199	0.102	1
mt-Nd5	0.000441239	0.1982	0.949	0.898	1
Fabp5	0.000459802	0.183086	0.617	0.476	1
Eef1b2	0.000462029	0.134129	0.998	1	1
Manf	0.000479154	0.149349	0.964	0.907	1
Mrpl42	0.000479886	0.179516	0.81	0.728	1
Vps28	0.000488615	0.16427	0.922	0.843	1
Hspbp1	0.000489127	0.131968	0.465	0.323	1
mt-Nd4l	0.000497607	0.178041	0.801	0.712	1
Psmb5	0.000498255	0.160083	0.96	0.92	1
Slfn1	0.000525197	-0.257701	0.409	0.514	1
Cisd1	0.000538267	0.166145	0.658	0.524	1
S100a10	0.000539719	-0.16936	0.998	1	1
Fam213a	0.000567001	0.127505	0.244	0.141	1
Mfsd4a	0.000583234	-0.0911078	0.083	0.163	1
Mrpl28	0.000601119	0.14003	0.557	0.431	1
Cdk2ap2	0.000630303	-0.236629	0.881	0.907	1
Rinl	0.000634474	-0.13743	0.814	0.882	1
Clpp	0.000634547	0.125834	0.318	0.208	1
Ssr4	0.000638152	0.14948	0.966	0.914	1
Hspe1	0.000642991	0.1447	0.975	0.949	1
Rpl28	0.000643568	0.0877979	1	1	1
Kdelr2	0.000644892	0.133449	0.687	0.559	1
Dda1	0.000662564	0.103417	0.611	0.466	1
Rbbp4	0.000682003	0.164777	0.758	0.655	1
Nudt5	0.000690031	0.104832	0.664	0.53	1
Lsm4	0.000697016	0.170253	0.949	0.93	1
Mif	0.000707772	0.196991	0.982	0.978	1
Mdh2	0.00070895	0.14361	0.98	0.949	1
Psmb2	0.000717033	0.135429	0.935	0.917	1
Cklf	0.00072724	0.139	0.517	0.387	1
Mrps33	0.000733469	0.139662	0.913	0.837	1
Mir142hg	0.000766149	-0.0926125	0.081	0.16	1
Pigp	0.000766222	0.1431	0.541	0.403	1
Rps10	0.000774187	0.0698163	1	1	1
Lgals3	0.000774882	0.180387	0.957	0.907	1
Polr2i	0.000777286	0.137367	0.604	0.47	1
Vezf1	0.00077931	-0.194489	0.302	0.412	1
Rps8	0.000786512	0.0909344	1	1	1
Cdkn1b	0.000802694	-0.289803	0.517	0.575	1
Gsto1	0.00083938	0.0723639	0.206	0.109	1
Nucks1	0.000847946	-0.207987	0.949	0.936	1
Thoc1	0.00086748	0.127894	0.329	0.217	1
Pgrmc1	0.000885372	0.116508	0.611	0.476	1
Ssh2	0.000891831	-0.168779	0.168	0.256	1
Pnrc1	0.000914607	-0.161458	0.781	0.847	1
Commd4	0.000915698	0.146627	0.669	0.578	1
Npc2	0.000932565	-0.142462	0.888	0.927	1
Zfp386	0.000933303	-0.0759473	0.074	0.15	1
Cd226	0.000938634	0.20176	0.687	0.585	1
Sf3b6	0.000944693	0.143454	0.944	0.933	1
1190007I07Rik	0.000948867	0.103163	0.336	0.22	1
Slc7a6os	0.000949021	-0.131612	0.237	0.345	1
Tubg1	0.000951868	0.0992273	0.295	0.192	1
Hat1	0.00100145	0.12449	0.409	0.291	1
Phax	0.00100384	0.11736	0.51	0.377	1
Serpinb6b	0.00100897	0.21718	0.68	0.562	1
Lyst	0.00101264	0.140862	0.521	0.399	1
Gpr18	0.00102187	-0.112384	0.076	0.15	1
Ets1	0.00102245	-0.221397	0.937	0.93	1
Vma21	0.00102561	0.116158	0.653	0.53	1
Gzmf	0.00103731	0.974967	0.208	0.118	1
Wdr83os	0.00105149	0.1471	0.617	0.508	1
Ncf4	0.0010522	0.154191	0.893	0.837	1
Tipin	0.00105787	0.157569	0.555	0.447	1
Ube2d3	0.00106512	-0.135533	0.984	0.987	1
Cox17	0.00107465	0.154209	0.993	0.978	1
Cndp2	0.00108321	0.111074	0.403	0.284	1
Sf3b5	0.00114172	0.151141	0.935	0.888	1
Fyb	0.00114262	-0.205696	0.928	0.949	1
Capza2	0.0011947	0.13166	0.951	0.891	1
Abtb1	0.00120047	-0.0991207	0.096	0.173	1
Atp6v0e	0.00121666	0.140044	0.926	0.888	1
Gm30918	0.00121755	0.0922928	0.21	0.118	1
Mrto4	0.00123394	0.160572	0.595	0.47	1
Nudcd2	0.00126199	0.152519	0.669	0.55	1
Nubp1	0.00126895	0.134452	0.803	0.677	1
Dctpp1	0.00128594	0.119308	0.548	0.435	1
Hmgb2	0.00128707	-0.23114	0.996	0.99	1
Mrpl17	0.00131506	0.133719	0.591	0.447	1
Psma3	0.0013297	0.139273	0.98	0.955	1
Sssca1	0.00133171	0.128445	0.477	0.361	1
Psmb3	0.00133685	0.143714	0.989	0.968	1
Foxo1	0.00135922	-0.100763	0.081	0.153	1
Tbcb	0.00138445	0.160844	0.729	0.613	1
Fxn	0.00138611	0.107515	0.311	0.201	1
Satb1	0.00138824	-0.301058	0.34	0.422	1
Enoph1	0.00139132	0.0787529	0.168	0.086	1
Pih1d1	0.00139341	0.105994	0.644	0.521	1
Atg16l1	0.00140504	0.0807276	0.199	0.109	1
Cdk4	0.00140735	0.163812	0.781	0.709	1
Cd8b1	0.00142285	-0.16276	0.996	0.994	1
Pim3	0.00143338	0.0895316	0.427	0.288	1
Lamtor5	0.00148444	0.140417	0.837	0.741	1
Ostc	0.00149006	0.1252	0.953	0.914	1
Endod1	0.00152883	0.100527	0.409	0.297	1
Cd3e	0.00153233	-0.121216	0.996	0.997	1
Mrpl54	0.00155058	0.143105	0.886	0.843	1
Prdx1	0.00155857	0.162386	0.964	0.955	1
Dhx34	0.00156087	0.0436616	0.121	0.051	1
Mcm3	0.0015753	0.15643	0.441	0.329	1
Flna	0.00158701	-0.19263	0.577	0.629	1
Tsc22d4	0.00158709	-0.174028	0.917	0.92	1
Errfi1	0.0016019	-0.134315	0.15	0.236	1
Gramd3	0.00161662	-0.176744	0.123	0.201	1
Kras	0.00162632	0.169581	0.832	0.773	1
Cenpf	0.00163297	-0.376749	0.573	0.674	1
Acadl	0.00166324	0.152837	0.859	0.77	1
Ifit3	0.00166892	-0.260348	0.06	0.125	1
Ccdc112	0.00168395	0.080278	0.112	0.048	1
Dnah8	0.00168573	-0.179986	0.508	0.575	1
Washc3	0.0017508	0.157028	0.622	0.54	1
Sec61b	0.00175576	0.116893	0.993	0.99	1
Erp29	0.00179228	0.169502	0.933	0.856	1
Ddx5	0.00179426	-0.129566	0.998	0.997	1
Spint2	0.00179918	0.12209	0.568	0.45	1
A930015D03Rik	0.00181967	-0.0905422	0.103	0.182	1
Rab37	0.00185325	-0.0776375	0.054	0.115	1
Adap1	0.00187138	0.0983844	0.396	0.272	1
Cdk2ap1	0.00193488	0.148834	0.785	0.642	1
Dmap1	0.00196223	0.096598	0.26	0.169	1
Ifi203	0.00196893	-0.275501	0.926	0.949	1
Ubash3b	0.00197641	0.155758	0.629	0.521	1
Hsp90ab1	0.00202248	0.109629	1	1	1
Ehd3	0.00205439	-0.115652	0.105	0.182	1
Rpl10	0.00206398	0.112403	1	0.997	1
Dlat	0.0020654	0.081654	0.347	0.23	1
Cox8a	0.00206864	0.103415	0.998	0.994	1
Eno3	0.0020785	0.161035	0.647	0.511	1
Mthfd1	0.00209357	0.0662579	0.159	0.083	1
Pdcd5	0.00211466	0.123173	0.926	0.84	1
Exosc9	0.00211842	0.0581192	0.336	0.224	1
Snu13	0.00213119	0.171731	0.902	0.882	1
Dcun1d5	0.00215084	0.142058	0.83	0.741	1
1500011K16Rik	0.00216842	0.100541	0.286	0.188	1
Atp5g2	0.00216995	0.118904	0.998	0.984	1
Cacybp	0.00218241	0.147611	0.893	0.834	1
Bola3	0.00219617	0.123714	0.81	0.706	1
Rpl7	0.00221546	0.0939443	0.998	1	1
Mydgf	0.00222779	0.109437	0.707	0.581	1
Fkbp1a	0.00224776	0.137835	0.953	0.917	1
Mrpl18	0.00230484	0.138434	0.886	0.808	1
H2afz	0.00232462	0.125263	0.996	1	1
Tapbpl	0.00235763	-0.177888	0.564	0.629	1
Ppp1r2	0.00236354	0.130517	0.611	0.508	1
Lrif1	0.00236818	-0.154784	0.405	0.505	1
Stt3a	0.00240162	0.115151	0.6	0.486	1
Btg2	0.00242047	-0.343302	0.763	0.773	1
Tmem126a	0.00243417	0.118784	0.83	0.712	1
Trbc2	0.00245774	0.149232	1	1	1
Abca2	0.00246149	-0.105085	0.217	0.313	1
Mapk9	0.0024716	0.114796	0.304	0.214	1
Vps33a	0.00249274	0.061312	0.159	0.083	1
Lrrfip2	0.00251847	0.126073	0.353	0.246	1
Gimap6	0.0025309	-0.206939	0.868	0.882	1
Mgme1	0.0025413	0.0661679	0.103	0.045	1
AW112010	0.00256922	0.144696	1	1	1
Znhit3	0.00264355	0.0679741	0.342	0.227	1
Taf8	0.00267849	-0.0685526	0.076	0.144	1
Ptpn18	0.00269717	-0.122898	1	0.994	1
Lsm2	0.00269902	0.147794	0.828	0.728	1
Mrps15	0.00278717	0.167783	0.736	0.645	1
Pdk3	0.00282389	0.120004	0.268	0.179	1
Elf1	0.0028476	-0.206544	0.841	0.85	1
Ccnd2	0.00285498	-0.245046	0.468	0.54	1
Gpatch11	0.00287397	0.144596	0.535	0.422	1
Spr	0.00302701	0.0745409	0.23	0.144	1
Pdss1	0.00304303	-0.070483	0.049	0.105	1
Samd3	0.00304597	-0.093111	0.094	0.166	1
Akap13	0.00306487	-0.152541	0.931	0.933	1
Mlec	0.0030727	0.152947	0.783	0.706	1
Cyth3	0.00311285	-0.0596069	0.056	0.115	1
Alg5	0.00312347	0.155197	0.602	0.514	1
Nr2c2	0.00313388	-0.117671	0.251	0.348	1
Psmc6	0.00314514	0.111522	0.794	0.703	1
Rpl10a	0.00319221	0.0936216	0.998	0.994	1
Aes	0.00319565	0.135683	0.991	0.981	1
Ppp1ca	0.00322705	0.0786782	1	0.994	1
Kif3b	0.00325931	0.062365	0.157	0.083	1
Ifitm3	0.00326315	0.332885	0.568	0.466	1
Rpl18	0.00326578	0.0806814	1	1	1
AA467197	0.00328963	0.139647	0.485	0.367	1
Atp5f1	0.00329065	0.0966781	0.996	0.99	1
Chaf1b	0.00332457	0.100798	0.255	0.166	1
Adam17	0.00332842	0.0740275	0.441	0.313	1
2022-09-11	0.00335607	0.115652	0.821	0.719	1
Tmem70	0.00336483	0.0675765	0.396	0.284	1
Mpc1	0.00339446	0.111016	0.837	0.751	1
Uqcrc1	0.00339939	0.109056	0.814	0.741	1
Rgs10	0.00341121	-0.171461	0.107	0.176	1
Mrpl45	0.00342389	0.0719611	0.353	0.24	1
Fgl2	0.00342747	-0.343852	0.673	0.716	1
Ctdnep1	0.00354344	0.121347	0.503	0.396	1
Tyms	0.00355414	0.114114	0.483	0.377	1
Stoml2	0.00366999	0.135401	0.535	0.425	1
Vrk3	0.00368555	-0.112627	0.387	0.489	1
Fam219b	0.00369199	0.0627205	0.179	0.099	1
Hmbs	0.00373392	0.0955037	0.414	0.297	1
Tmem238	0.00374228	0.106489	0.365	0.268	1
Rad23a	0.00382059	0.115954	0.479	0.374	1
Dusp4	0.00384336	0.131048	0.555	0.435	1
Nmral1	0.00387847	0.0784492	0.284	0.182	1
Eif4a3	0.00392105	0.150981	0.756	0.649	1
Ahnak	0.00393532	-0.209734	0.839	0.866	1
Zbtb32	0.00399623	0.152497	0.653	0.569	1
5031425E22Rik	0.0040114	-0.19876	0.477	0.556	1
Cers2	0.00402804	0.123968	0.647	0.546	1
Armc3	0.00403148	-0.134967	0.101	0.166	1
Smdt1	0.00403488	0.127572	0.971	0.92	1
Cenpx	0.00408873	0.113855	0.841	0.728	1
Srp19	0.00409341	0.135474	0.913	0.853	1
Pdrg1	0.00409484	0.12253	0.609	0.521	1
Ppp1r10	0.00413703	-0.144518	0.546	0.601	1
Neurl3	0.00413728	-0.114166	0.257	0.351	1
Blvra	0.00414759	0.0903321	0.512	0.403	1
Fos	0.0041999	-0.239274	0.329	0.409	1
Sesn3	0.00423253	-0.213583	0.244	0.323	1
Fam46c	0.00424223	-0.0737854	0.078	0.144	1
Pik3r1	0.00435899	-0.18997	0.548	0.61	1
Serpinb9b	0.00439234	0.243954	0.271	0.185	1
Pgls	0.00440385	0.0806147	0.919	0.879	1
B3gat3	0.00443772	0.110781	0.497	0.396	1
Mrpl23	0.00446308	0.136379	0.774	0.642	1
Mrpl21	0.00447456	0.110946	0.725	0.62	1
Pdzd11	0.0044865	0.0836291	0.383	0.275	1
Snrk	0.00454186	-0.104903	0.197	0.284	1
A630072M18Rik	0.00454354	-0.116266	0.161	0.236	1
Kti12	0.00456903	0.0703649	0.179	0.105	1
Tgs1	0.00461333	0.110159	0.391	0.288	1
Prdx6	0.00465402	0.122354	0.899	0.821	1
Trp53inp1	0.00465425	-0.0970964	0.069	0.128	1
Nelfe	0.0046905	0.0862958	0.421	0.31	1
Timm8a1	0.00474272	0.146672	0.45	0.371	1
Fam96b	0.00474683	0.132141	0.817	0.77	1
Irf2bp1	0.00475688	-0.0804027	0.096	0.163	1
Rpl7a	0.00476956	0.0801649	1	1	1
Cmtm7	0.00477534	0.154627	0.962	0.949	1
Rad21	0.0048461	-0.253627	0.671	0.725	1
Dynlt1c	0.00486592	0.0978367	0.248	0.163	1
Mrpl11	0.00487372	0.0678202	0.582	0.454	1
Twnk	0.00489664	-0.0621227	0.056	0.112	1
Ndufaf6	0.00494589	0.0710547	0.168	0.096	1
Dmac2	0.00495591	-0.121017	0.168	0.249	1
Rpl13a	0.00496242	-0.12641	0.975	0.974	1
Gm47283	0.00497126	0.121814	0.89	0.818	1
Cul1	0.00500282	0.0899361	0.53	0.419	1
Dcaf7	0.00501229	0.0574043	0.248	0.153	1
Adgre5	0.00505557	-0.179619	0.548	0.623	1
Nr4a1	0.00507917	-0.0961274	0.087	0.15	1
Eef1e1	0.00508109	0.0938356	0.593	0.511	1
Gimap1	0.00508547	-0.174414	0.935	0.939	1
Malat1	0.00508574	-0.276919	1	1	1
Krtcap2	0.00508792	0.0935268	0.982	0.958	1
Mcl1	0.00508795	-0.202484	0.826	0.85	1
Acp1	0.00512691	0.124658	0.624	0.511	1
2310011J03Rik	0.00513037	0.118961	0.593	0.502	1
Pycrl	0.00513266	0.082284	0.309	0.211	1
BC005537	0.00517338	-0.179393	0.655	0.684	1
Bckdk	0.00517732	0.0734666	0.23	0.147	1
Atraid	0.00521478	0.0922771	0.593	0.473	1
Ndufb6	0.00528496	0.121266	0.821	0.757	1
Ndufs8	0.00533376	0.0992471	0.893	0.843	1
Tpm1	0.00536895	0.0902879	0.405	0.297	1
Nabp1	0.00538272	-0.176042	0.772	0.796	1
Fam162a	0.00538905	0.176993	0.763	0.665	1
Mrps7	0.00539554	0.109973	0.633	0.518	1
Selenot	0.00545787	-0.155257	0.492	0.562	1
Prkacb	0.00553326	-0.169251	0.528	0.588	1
Erg28	0.005537	0.115924	0.591	0.482	1
Dusp19	0.00558217	0.0809675	0.36	0.256	1
Nif3l1	0.00558623	0.0738425	0.136	0.073	1
Tmem14c	0.00559655	0.126841	0.931	0.879	1
Commd2	0.00566037	0.115589	0.658	0.585	1
Son	0.00572421	-0.164101	0.96	0.971	1
Gapdh	0.00573119	0.104467	0.998	1	1
Trappc9	0.00573315	-0.0867191	0.112	0.179	1
Bcl2	0.00580672	-0.220946	0.732	0.808	1
Terf1	0.00600119	-0.152449	0.286	0.367	1
Cox7a2	0.00602351	0.1045	0.989	0.981	1
Pole3	0.00602673	0.0684774	0.477	0.348	1
Nfs1	0.00605815	0.0757358	0.304	0.214	1
S100a4	0.00611338	0.138498	0.991	0.965	1
Grcc10	0.00612006	-0.150211	0.673	0.735	1
Marf1	0.00612875	-0.134712	0.206	0.281	1
Serpinb9	0.00617761	0.179961	0.562	0.47	1
Pus1	0.006204	0.0667898	0.362	0.252	1
Ndufa4	0.0062301	0.116021	0.996	0.978	1
Gpr108	0.00623103	0.0853018	0.333	0.24	1
Eomes	0.00623283	-0.185708	0.199	0.275	1
Fbl	0.00625307	0.130823	0.691	0.617	1
Ufd1	0.00631862	0.117028	0.519	0.435	1
Cox7b	0.00632227	0.119359	0.987	0.949	1
Hnrnpab	0.00635314	0.110476	0.937	0.888	1
Ccdc69	0.00638058	0.0618079	0.275	0.179	1
Klk8	0.00640439	0.0938769	0.566	0.45	1
Srpr	0.0064559	0.0605405	0.604	0.486	1
U2af1	0.0065146	0.146691	0.879	0.818	1
Tk2	0.00653526	-0.0937242	0.074	0.131	1
Dhx36	0.00658232	0.113907	0.698	0.588	1
Fasl	0.00664893	-0.171958	0.47	0.534	1
Pin1	0.00665034	0.0921661	0.687	0.559	1
H2-Q4	0.00668557	-0.191818	0.933	0.968	1
Dcaf11	0.00670156	-0.118895	0.26	0.339	1
Rnf4	0.00676051	-0.110548	0.465	0.565	1
Yipf1	0.00678796	0.0791946	0.644	0.543	1
Rtn3	0.0068299	0.106756	0.756	0.649	1
Snhg9	0.0068433	-0.0986023	0.092	0.153	1
Chchd4	0.00687413	0.0789774	0.253	0.169	1
Ier5l	0.00687571	-0.115355	0.201	0.291	1
Tfb2m	0.00688876	-0.105093	0.166	0.243	1
Ms4a4b	0.00690257	-0.20464	0.998	0.997	1
Polr3d	0.00691585	0.108296	0.291	0.208	1
Srsf7	0.00695762	0.125133	0.846	0.776	1
Rex1bd	0.00697727	0.124817	0.877	0.792	1
Cyba	0.00698312	0.08957	0.998	0.987	1
Srgn	0.00699368	-0.152388	0.998	0.984	1
Efhd2	0.00705216	0.103735	0.821	0.741	1
Stat4	0.00706357	-0.195485	0.497	0.534	1
Wdr5	0.00709277	0.0855774	0.21	0.137	1
Aldoa	0.00710274	0.110177	0.982	0.946	1
Tagap	0.00714192	-0.0696185	0.056	0.109	1
Bloc1s1	0.00716704	-0.170256	0.517	0.578	1
Atp6v0b	0.00717813	0.12507	0.756	0.674	1
Pglyrp1	0.00718277	0.136291	0.922	0.869	1
Alg3	0.00723477	0.0524345	0.132	0.07	1
Rc3h2	0.00726561	-0.0852003	0.309	0.412	1
Fau	0.00733223	-0.0800683	1	1	1
Snrpe	0.00735062	0.0967814	1	0.978	1
Nt5m	0.00735517	0.0596439	0.179	0.109	1
Fuz	0.00739393	0.0410877	0.121	0.061	1
Pop5	0.00740393	0.132383	0.729	0.649	1
Plpp5	0.00742271	0.0544513	0.116	0.058	1
Dusp12	0.0074573	0.0695112	0.195	0.121	1
Fis1	0.00748177	0.114837	0.973	0.93	1
Batf	0.00748792	0.119505	0.584	0.482	1
Ostf1	0.00749185	0.100872	0.989	0.981	1
BC051226	0.00755078	0.0506295	0.114	0.058	1
Esyt1	0.00756097	-0.152486	0.817	0.834	1
Hist1h2ab	0.0077199	-0.109765	0.141	0.214	1
Luzp1	0.00773862	0.0932094	0.145	0.083	1
Ptp4a2	0.00774821	-0.148824	0.935	0.923	1
Lpp	0.00778511	-0.0820498	0.107	0.173	1
Hsd17b12	0.00781648	0.138465	0.55	0.45	1
Ly6c2	0.00786371	-0.608871	0.438	0.482	1
Hcst	0.00789446	-0.155675	0.973	0.971	1
Btg3	0.00792495	0.0708927	0.327	0.227	1
Hjurp	0.00804764	-0.240544	0.313	0.396	1
Rapsn	0.00808733	0.078811	0.166	0.102	1
Cnn2	0.0081003	-0.115025	0.96	0.968	1
Ndufv1	0.00817847	0.0954656	0.613	0.537	1
Rab8b	0.00817939	-0.150512	0.761	0.815	1
Polr2j	0.00820144	0.0956477	0.915	0.818	1
Lgalsl	0.00824846	0.0760064	0.284	0.195	1
Selenof	0.00831253	0.0890876	0.949	0.942	1
Fth1	0.00831761	0.0786779	1	1	1
Mrfap1	0.00832522	0.100891	0.888	0.827	1
Mettl22	0.00838696	0.0585029	0.15	0.086	1
Fam111a	0.00843542	-0.177247	0.362	0.438	1
Nbn	0.00852171	0.0940617	0.152	0.089	1
H2-K1	0.00854268	-0.0938427	1	1	1
Nans	0.00861859	0.0953567	0.727	0.642	1
Knstrn	0.00862033	-0.158749	0.696	0.751	1
Impa1	0.00862432	0.0770878	0.691	0.553	1
Alas1	0.00868819	0.0791422	0.219	0.147	1
Lamtor4	0.00869048	0.120821	0.955	0.904	1
Rer1	0.00871174	0.111993	0.904	0.834	1
Ndufa6	0.00874202	-0.121143	0.933	0.936	1
Rgs16	0.00879535	0.11888	0.772	0.687	1
Eif2b5	0.00884276	0.0717527	0.347	0.259	1
Emg1	0.00885025	0.103227	0.953	0.936	1
Atpaf2	0.00887988	0.0743048	0.197	0.125	1
Mrpl37	0.00888235	0.0564033	0.206	0.131	1
Ttc21b	0.0088941	0.0655793	0.128	0.07	1
Eef1akmt1	0.00891095	0.0999113	0.573	0.476	1
Tmem107	0.00891407	0.0494832	0.13	0.07	1
Zfp518a	0.00891611	-0.073695	0.101	0.163	1
Rpl27-ps3	0.00894654	0.0971198	0.452	0.351	1
Ulbp1	0.0089482	-0.0890669	0.188	0.268	1
Tlcd2	0.00897726	0.0805898	0.204	0.131	1
Gpt	0.00900269	-0.0661559	0.078	0.134	1
Ppp2r5d	0.00901453	-0.0920225	0.168	0.243	1
Ndufa11	0.00910374	0.0977124	0.917	0.866	1
Rpl27a	0.00912934	0.0595907	1	1	1
Ddost	0.00917386	0.10652	0.866	0.815	1
Eea1	0.00920305	0.179114	0.546	0.466	1
Cope	0.00920542	0.111217	0.792	0.754	1
Atad5	0.00921462	0.0447586	0.13	0.07	1
Rps15a	0.00921924	0.0704556	0.998	1	1
Clk1	0.00928737	-0.209339	0.662	0.716	1
Nampt	0.00928963	0.0671066	0.289	0.204	1
Abhd13	0.00935413	-0.0558945	0.078	0.137	1
Lsm8	0.00939847	0.114693	0.711	0.607	1
Elf2	0.00943886	0.0761622	0.463	0.364	1
Ccdc117	0.00952864	-0.0816342	0.089	0.15	1
Uqcrfs1	0.00954362	0.113641	0.893	0.863	1
Xlr4c	0.00954518	0.0920964	0.472	0.377	1
Cpox	0.0095747	0.0814951	0.268	0.192	1
Abcb1a	0.00967751	-0.106328	0.145	0.217	1
Hilpda	0.00975989	0.0992182	0.387	0.297	1
Chchd1	0.00977889	0.124677	0.839	0.751	1
Snrpb	0.00983105	0.112696	0.969	0.958	1
Gm33104	0.0098532	-0.096503	0.159	0.23	1
Epdr1	0.00987509	0.0729907	0.459	0.351	1
Ptrh2	0.00988731	0.0856065	0.425	0.323	1
Ptcd2	0.00991587	0.0826387	0.479	0.371	1
Reep5	0.00992826	0.105011	0.984	0.965	1
Hscb	0.00997105	0.113033	0.673	0.556	1
Nt5c3b	0.00997742	0.0946192	0.617	0.514	1
Snrpb2	0.00998786	-0.113598	0.754	0.799	1
Bnip3l	0.010009	-0.140763	0.678	0.751	1
Nfkbiz	0.0100099	-0.121593	0.172	0.243	1
Pdcd2l	0.0100573	0.0529718	0.179	0.109	1
Izumo1r	0.0100699	-0.115042	0.107	0.173	1
Gps1	0.010107	0.0764122	0.535	0.422	1
Alad	0.0101262	0.111409	0.6	0.511	1
Gm6563	0.010381	0.0658714	0.217	0.141	1
Hspa4	0.0103811	0.110315	0.743	0.645	1
Tmem101	0.0103862	0.0716162	0.235	0.157	1
Ttc39b	0.0104059	-0.126424	0.468	0.537	1
Atic	0.0104101	0.124251	0.416	0.323	1
Mgat5	0.0105002	-0.0604363	0.054	0.102	1
Arfgap3	0.0105052	0.0509429	0.112	0.058	1
Tuba1b	0.0105058	0.194761	0.902	0.827	1
Emb	0.0105748	-0.175901	0.081	0.134	1
Mcm5	0.0106277	0.0944773	0.544	0.425	1
Rcl1	0.010642	0.0706213	0.213	0.141	1
Tcea1	0.0107124	-0.144222	0.727	0.76	1
Chmp5	0.0107583	0.119911	0.736	0.655	1
Zfp84	0.010777	-0.113168	0.139	0.201	1
Hprt	0.0108289	0.117086	0.857	0.76	1
Ift27	0.0109062	0.095614	0.264	0.185	1
Emc6	0.010916	0.104804	0.792	0.738	1
Tle4	0.0109571	-0.187043	0.403	0.47	1
Slamf7	0.0109715	-0.105845	0.136	0.204	1
Cnpy2	0.0110308	0.0763717	0.676	0.559	1
Rgs8	0.0110856	0.0704271	0.161	0.096	1
BC147527	0.0110917	-0.100034	0.154	0.224	1
Gbp2	0.0110952	-0.156145	0.219	0.294	1
Sem1	0.0111965	0.0838256	0.993	0.987	1
Tab1	0.0112031	-0.0636295	0.078	0.134	1
Scd2	0.0112654	-0.178099	0.568	0.649	1
St3gal4	0.0112921	0.0757369	0.282	0.201	1
Malsu1	0.0113132	0.121181	0.515	0.419	1
Rras	0.011334	0.0667748	0.215	0.141	1
Stk4	0.0113389	-0.159489	0.64	0.681	1
Ivd	0.0113511	0.0534545	0.143	0.083	1
Il27ra	0.0113562	0.0861702	0.499	0.406	1
Ifitm2	0.0113653	0.118692	0.481	0.367	1
Snrnp40	0.0113715	0.0938827	0.667	0.559	1
Ctse	0.011408	-0.156453	0.436	0.518	1
Surf2	0.0115097	0.0505051	0.331	0.243	1
Fam208b	0.0115269	0.102295	0.275	0.198	1
Rpa3	0.0115404	0.0840737	0.673	0.581	1
Eno1	0.0115442	0.164524	0.919	0.856	1
Ppp6r1	0.01156	-0.15797	0.588	0.633	1
Ifi214	0.0115868	-0.220285	0.378	0.463	1
Tkt	0.0116267	0.116223	0.879	0.824	1
Thoc7	0.0116378	0.105303	0.852	0.751	1
Chd2	0.0116517	-0.141722	0.707	0.735	1
Gem	0.0116852	0.0648468	0.617	0.482	1
Pianp	0.0116881	0.0604304	0.3	0.204	1
Tcf25	0.0116913	-0.156833	0.716	0.764	1
mt-Nd1	0.0117561	-0.154585	0.998	0.994	1
Egln1	0.0119515	0.106107	0.575	0.47	1
Slc16a3	0.0119677	0.0844775	0.262	0.182	1
St8sia4	0.0119894	-0.220662	0.271	0.345	1
Mocs2	0.0120351	0.0726435	0.463	0.358	1
Acads	0.0120557	0.0897055	0.564	0.47	1
Stoml1	0.0120758	0.0604444	0.123	0.067	1
Ddah2	0.0121152	-0.0976127	0.116	0.179	1
Ssbp4	0.0121362	0.0973314	0.723	0.677	1
Cdc42se2	0.0122199	-0.113543	0.38	0.47	1
Fam92a	0.0122867	0.0874662	0.588	0.482	1
Ppp1r11	0.0123814	0.0976025	0.848	0.815	1
Eif3i	0.0123925	0.0817041	0.964	0.923	1
Ube2a	0.0123928	0.126665	0.823	0.728	1
Mtmr1	0.0124296	-0.148838	0.389	0.47	1
Rsrp1	0.0124773	-0.130274	0.872	0.917	1
Mrpl10	0.012496	0.0858795	0.387	0.294	1
Pkm	0.0125225	0.130619	0.984	0.971	1
Dpy30	0.0125436	0.104716	0.799	0.732	1
Znrf2	0.0126028	-0.130859	0.544	0.61	1
H1fx	0.0126472	-0.133997	0.157	0.227	1
Gps2	0.0126791	-0.146752	0.423	0.492	1
Rbm5	0.0127136	-0.113365	0.49	0.569	1
Helz2	0.0127465	-0.120005	0.179	0.246	1
Clns1a	0.0127526	0.116718	0.588	0.511	1
Pradc1	0.0127619	0.0995705	0.237	0.169	1
Klhl6	0.0127654	-0.137778	0.239	0.307	1
Hivep2	0.0128631	-0.0966926	0.157	0.224	1
Cdk5	0.0128757	0.0723206	0.197	0.128	1
Tecpr1	0.0128976	-0.110838	0.215	0.288	1
Aplp2	0.0128981	-0.206786	0.503	0.565	1
Tmprss6	0.0129243	0.0540927	0.128	0.07	1
Plec	0.0129719	-0.134225	0.389	0.463	1
Lamc1	0.0129885	0.0514617	0.152	0.089	1
Zcrb1	0.0130327	0.14765	0.861	0.767	1
Trappc6a	0.0130522	0.124756	0.702	0.617	1
Rfc4	0.0130967	0.110921	0.447	0.361	1
Ppp2r5c	0.0131519	-0.16014	0.685	0.703	1
Pomp	0.0132072	0.12696	0.978	0.952	1
Hmgb1	0.0132586	-0.0811132	1	1	1
Ap2a2	0.0134258	-0.12203	0.233	0.3	1
Ykt6	0.0134564	-0.132002	0.282	0.361	1
Ifngr1	0.0134861	-0.250606	0.776	0.799	1
Tsc22d3	0.0135518	-0.178719	0.306	0.377	1
Ndufc1	0.0136122	0.0879528	0.915	0.872	1
Prdx2	0.0136725	0.136058	0.864	0.818	1
Cd5	0.0137305	-0.157574	0.474	0.556	1
Atp5g3	0.0138406	0.11182	0.953	0.927	1
Rnf41	0.0138553	0.0502836	0.11	0.058	1
Arl16	0.0139186	0.0720871	0.192	0.125	1
Hp1bp3	0.0139192	-0.165164	0.868	0.885	1
Cdpf1	0.0139845	0.0600898	0.28	0.195	1
Phlda1	0.0141503	0.112627	0.535	0.431	1
Acot7	0.0142024	0.141876	0.743	0.658	1
Paxbp1	0.0142521	0.0742308	0.329	0.249	1
Msn	0.0142536	-0.142156	0.922	0.942	1
Hadh	0.0142547	-0.120665	0.255	0.323	1
Gstp1	0.0143638	0.0790466	0.257	0.182	1
Mycbp	0.0143833	0.0558915	0.248	0.173	1
Sesn1	0.0143938	-0.0725018	0.056	0.102	1
Clec2i	0.0144719	-0.0659083	0.092	0.15	1
Gnpnat1	0.0145296	0.073634	0.387	0.297	1
Mms22l	0.0145663	0.0435098	0.179	0.112	1
Hikeshi	0.0145846	0.122063	0.709	0.655	1
Cdc14a	0.0147189	0.0862903	0.474	0.383	1
Ifi209	0.0147327	-0.232432	0.459	0.524	1
Anapc10	0.0147855	0.0836706	0.349	0.259	1
Gns	0.0147993	0.0630947	0.192	0.125	1
Tmem128	0.0148001	0.104986	0.711	0.617	1
Cep97	0.0148578	-0.0991257	0.154	0.22	1
Dbi	0.0148685	0.137584	0.924	0.885	1
Dynll1	0.0149353	0.0723535	0.993	0.987	1
Ctsw	0.0150174	-0.152574	0.935	0.93	1
Tm2d3	0.015047	0.0672056	0.405	0.304	1
Cnbp	0.015206	0.113727	0.982	0.949	1
Spin2c	0.0152181	-0.0501462	0.063	0.112	1
Irf2bp2	0.0152807	-0.124231	0.298	0.371	1
Golm1	0.0152937	-0.0779746	0.143	0.208	1
Mcrip1	0.0152999	0.0906551	0.678	0.556	1
Lncpint	0.0153456	-0.0922253	0.089	0.144	1
Taf10	0.0153496	0.107452	0.96	0.936	1
Rpl22l1	0.0155415	0.0832135	1	0.984	1
Srp9	0.0155627	0.0808891	0.969	0.917	1
Lrpap1	0.0155906	0.0736931	0.407	0.319	1
Mepce	0.0156358	-0.106659	0.183	0.256	1
Arhgef9	0.0156846	0.0996268	0.246	0.173	1
Smpdl3b	0.0157512	0.0716615	0.219	0.15	1
Mettl7a1	0.0157564	-0.0593983	0.063	0.112	1
Stat1	0.0157615	-0.205503	0.772	0.812	1
Farsb	0.0158572	0.0814795	0.412	0.329	1
Calr	0.0159104	0.122598	0.989	0.955	1
Txnl1	0.0159276	0.121925	0.861	0.796	1
Tgds	0.0159595	0.0898245	0.246	0.176	1
Rassf3	0.015976	-0.0991012	0.174	0.243	1
Ankrd49	0.0160418	0.0747297	0.286	0.204	1
Rps5	0.0160952	0.0515179	1	0.997	1
Ddx60	0.0161582	-0.124574	0.119	0.179	1
Mettl21a	0.0161653	0.0523075	0.132	0.077	1
Cyb5a	0.0161758	0.0911829	0.747	0.687	1
Lamtor2	0.0161861	0.070201	0.911	0.879	1
Pts	0.0162222	0.0898456	0.532	0.431	1
Il17ra	0.0162412	-0.0977586	0.132	0.192	1
Gsap	0.0162731	0.0640473	0.139	0.083	1
Mbp	0.0163063	-0.113383	0.199	0.268	1
Ube2w	0.0163433	0.0711871	0.242	0.166	1
B930036N10Rik	0.0163554	-0.118848	0.159	0.22	1
Usf1	0.0164298	-0.13477	0.362	0.425	1
Ctsa	0.0164359	0.110922	0.546	0.457	1
Mars	0.0164538	0.0654323	0.248	0.176	1
Rpl35a	0.0164688	-0.0609483	1	1	1
Ccndbp1	0.0164895	0.095357	0.582	0.482	1
Pcbp2	0.0165859	-0.131451	0.957	0.958	1
Zfp207	0.0166633	-0.125233	0.662	0.716	1
Trappc4	0.0167257	0.0952295	0.801	0.748	1
Ndufb8	0.0167492	0.0906638	0.975	0.971	1
Bcap29	0.0167497	0.0901294	0.631	0.537	1
Smarcad1	0.0167589	0.077089	0.351	0.268	1
Cox16	0.016814	0.0832388	0.3	0.217	1
Sec11c	0.0170124	0.0952365	0.996	0.984	1
Gm9774	0.0170305	-0.046231	0.105	0.166	1
Tln1	0.0171302	-0.13195	0.953	0.946	1
Smim3	0.0171313	0.0617647	0.313	0.227	1
Lrrk1	0.0172382	-0.137475	0.206	0.265	1
Prim1	0.0173348	0.0810309	0.309	0.23	1
Sin3b	0.0173918	0.0953782	0.864	0.808	1
Clec2d	0.0173975	-0.123056	0.566	0.601	1
Cdca7l	0.0174183	0.0470362	0.26	0.182	1
Tmem163	0.0174352	0.107726	0.409	0.329	1
Acap2	0.017461	-0.10631	0.275	0.342	1
Itgb7	0.0174785	-0.212347	0.072	0.118	1
Tuba4a	0.0174937	0.105517	0.694	0.588	1
Txn1	0.0175558	0.0795697	0.998	0.997	1
Cct4	0.0176936	-0.102197	0.906	0.895	1
Spc24	0.0177092	0.0854017	0.682	0.613	1
Rbm14	0.0177136	0.0770286	0.277	0.201	1
mt-Nd2	0.0177402	-0.133093	0.996	0.997	1
Vps50	0.0177477	0.0410958	0.181	0.115	1
Ubc	0.0178337	-0.242218	0.658	0.658	1
Fam103a1	0.0178761	0.0864806	0.633	0.546	1
Jun	0.0179122	-0.339354	0.642	0.7	1
Fam185a	0.0179442	0.0315807	0.103	0.054	1
Ctdspl2	0.0179897	-0.0877203	0.284	0.351	1
Cbwd1	0.0180839	0.0619646	0.168	0.105	1
Nipal3	0.0181083	-0.114302	0.159	0.22	1
Taf7	0.0181306	-0.129003	0.447	0.518	1
Mrpl20	0.0182978	0.0956702	0.89	0.853	1
Aasdhppt	0.0183583	0.0605894	0.369	0.278	1
Gtf2h2	0.0183592	0.0631678	0.242	0.166	1
Sertad3	0.0184062	-0.0746105	0.105	0.163	1
Cog5	0.0185059	-0.0868454	0.13	0.188	1
Akt1	0.0185443	0.121246	0.521	0.45	1
Dnajc30	0.0185456	0.0806918	0.21	0.144	1
Mrpl24	0.0185581	0.0844069	0.689	0.585	1
Cops8	0.0186148	0.0862932	0.535	0.422	1
2010320M18Rik	0.0187617	0.0417694	0.11	0.061	1
Ddx27	0.0188798	0.102463	0.539	0.444	1
Adrm1	0.0189459	0.0938178	0.573	0.486	1
Lman2	0.018946	0.115548	0.89	0.792	1
Snrnp27	0.0189597	0.0710723	0.714	0.62	1
Arl8b	0.0189765	0.0514316	0.362	0.272	1
Rpl23	0.0190711	0.0622273	1	1	1
Tspan31	0.0190766	0.0822158	0.347	0.268	1
Chchd2	0.0190882	0.0804272	1	0.987	1
Glrx3	0.0191887	0.0877034	0.855	0.812	1
Mast3	0.0192756	0.0734144	0.219	0.153	1
Trim27	0.0193068	0.109194	0.606	0.508	1
Kdm4c	0.0193907	-0.0499522	0.101	0.16	1
Esyt2	0.0194525	-0.0971476	0.34	0.412	1
Utp18	0.0195163	0.104637	0.374	0.294	1
Zmym5	0.0195257	0.053908	0.282	0.201	1
Swi5	0.0195888	0.0871776	0.973	0.946	1
Eci1	0.0196194	0.0857509	0.479	0.387	1
Gnas	0.0196626	-0.107519	0.998	0.994	1
Phb	0.0197072	0.0781831	0.553	0.45	1
Gzmc	0.0197116	0.434874	0.181	0.121	1
Taf11	0.0198307	0.0880789	0.456	0.361	1
Gm44175	0.0199444	-0.0725427	0.083	0.134	1
Glipr2	0.0199616	-0.102584	0.564	0.639	1
Zfp160	0.0200926	-0.0716778	0.076	0.125	1
Ttc7b	0.0201151	-0.0481635	0.078	0.131	1
Fam102a	0.0201867	-0.125509	0.389	0.463	1
Mak16	0.0201944	0.100072	0.532	0.447	1
Rpia	0.0202108	0.0758539	0.407	0.323	1
Cenpk	0.0203223	-0.121104	0.21	0.275	1
Exoc3l	0.0203588	0.0344431	0.148	0.089	1
Ifitm1	0.0203695	0.592978	0.235	0.166	1
Cdc34	0.0204275	0.100474	0.591	0.514	1
Eef2kmt	0.0204334	0.0609927	0.161	0.102	1
Eif4e	0.0204861	0.0917141	0.664	0.578	1
Gimap9	0.0205884	-0.141284	0.669	0.719	1
Mri1	0.0206889	0.045341	0.253	0.179	1
Asb3	0.0207029	0.0490448	0.15	0.093	1
Nol10	0.0209153	0.0671517	0.306	0.227	1
Itgb1	0.0209593	-0.218929	0.801	0.805	1
Tctex1d2	0.0209772	0.0932246	0.246	0.173	1
Hist1h2be	0.0212268	-0.191795	0.311	0.377	1
Mylip	0.0213329	-0.0610751	0.083	0.134	1
Alg13	0.0213453	0.0703805	0.161	0.105	1
Mtmr12	0.0213561	-0.109302	0.19	0.252	1
Atp5o.1	0.0213789	0.102959	0.971	0.952	1
Tada1	0.0213828	0.0674587	0.239	0.173	1
Fhl2	0.0214079	0.0801299	0.36	0.281	1
Polr2d	0.0214205	0.0726557	0.409	0.313	1
Scaf1	0.0214208	0.0630016	0.172	0.112	1
Prelid2	0.0216512	0.085949	0.398	0.316	1
Timm8b	0.0216542	0.0557604	0.783	0.693	1
Gpr171	0.0216621	-0.159737	0.409	0.476	1
Azi2	0.0217334	-0.140391	0.506	0.562	1
Brms1	0.0218519	0.0697361	0.43	0.329	1
Fam98b	0.0218822	0.0936034	0.463	0.377	1
Ric1	0.0218948	-0.10015	0.136	0.192	1
St14	0.0219011	0.0672527	0.201	0.137	1
Ghitm	0.0219111	0.0972914	0.843	0.78	1
Wdr95	0.0219919	-0.0767425	0.125	0.182	1
Psma5	0.022062	0.0815981	0.919	0.879	1
Mlxip	0.0220898	-0.0844355	0.136	0.195	1
Nab2	0.0221688	0.0639694	0.396	0.307	1
Fam107b	0.0222927	-0.142177	0.772	0.789	1
Decr1	0.0223298	0.0654647	0.163	0.105	1
Ppp4r2	0.022378	-0.14317	0.597	0.617	1
Nde1	0.0223824	-0.146281	0.501	0.553	1
Phf21a	0.0224015	-0.0980958	0.134	0.195	1
Pgam1	0.0224189	0.125775	0.944	0.92	1
Tmsb4x	0.0224578	0.0755309	1	1	1
Mrpl16	0.0225071	0.0854705	0.427	0.339	1
Rps3	0.022557	0.061842	1	1	1
Gstp3	0.0225647	0.0989161	0.523	0.441	1
Dtd1	0.0226815	0.096419	0.488	0.387	1
Otub1	0.0227829	0.0781686	0.459	0.377	1
Gnl3	0.0228191	0.103283	0.555	0.466	1
Slc25a11	0.0228289	0.109713	0.729	0.655	1
Prelid1	0.0228747	0.0740888	0.98	0.952	1
Stat3	0.022881	0.10393	0.814	0.751	1
Perp	0.023068	0.0648351	0.201	0.137	1
Pik3r4	0.0231511	0.0470551	0.105	0.058	1
Fosl2	0.0231838	-0.142747	0.213	0.275	1
Srp14	0.023273	0.092405	0.964	0.927	1
Urod	0.0233715	0.0641005	0.331	0.249	1
1110008F13Rik	0.0234298	0.098779	0.868	0.805	1
Tmbim4	0.0235054	0.0944039	0.711	0.607	1
Dnmt1	0.0235135	0.0412119	0.501	0.403	1
Itm2c	0.0236094	-0.189202	0.43	0.486	1
Braf	0.0237843	0.0433564	0.206	0.141	1
Nlrc5	0.0238228	-0.149623	0.273	0.339	1
Ankib1	0.0238944	-0.127457	0.331	0.393	1
Dnajc15	0.0239121	0.0434042	0.624	0.518	1
Sdhb	0.023918	0.106959	0.935	0.898	1
Wdr74	0.0239341	0.0638673	0.302	0.227	1
Cd200	0.0239753	0.0441115	0.454	0.342	1
mt-Co1	0.0239858	-0.104739	1	1	1
Ppp1r12c	0.0241065	-0.089843	0.235	0.297	1
Itpkb	0.0241557	-0.117443	0.425	0.508	1
Taf5	0.0242252	-0.0640578	0.092	0.144	1
Rpsa	0.0242597	0.0652463	1	0.997	1
Emc4	0.0242939	0.0741757	0.566	0.463	1
Pa2g4	0.024298	0.1031	0.734	0.652	1
Isg20l2	0.0243162	0.0730274	0.293	0.22	1
Cwc22	0.0243878	0.0998435	0.273	0.204	1
Mrps28	0.0243886	0.084614	0.438	0.351	1
Arhgap11a	0.0245093	-0.207141	0.233	0.294	1
Tmem203	0.0245257	0.0451407	0.226	0.157	1
Arpc5	0.0245575	0.0896486	0.998	0.981	1
Ikbkap	0.0246391	0.0406366	0.13	0.077	1
Abcf1	0.0246499	-0.119496	0.732	0.741	1
Zcchc10	0.0246631	-0.126694	0.284	0.351	1
Polr3k	0.0246839	0.119966	0.72	0.655	1
Zw10	0.0247374	0.0270399	0.21	0.144	1
Pole4	0.0247558	0.0893589	0.689	0.588	1
Osbpl7	0.024765	-0.0455206	0.058	0.102	1
Mbnl1	0.0247938	-0.129719	0.989	0.99	1
Cd200r1	0.0248228	-0.112239	0.208	0.275	1
Numa1	0.0248928	-0.13315	0.302	0.38	1
Wsb1	0.0249292	-0.085615	0.286	0.355	1
Tmem165	0.0249942	0.0748193	0.557	0.473	1
Cyth1	0.0250247	-0.0537968	0.105	0.16	1
Lyrm9	0.0250249	0.10288	0.396	0.316	1
Fkbp3	0.025032	0.0910161	0.904	0.859	1
Bccip	0.0250815	0.130615	0.579	0.521	1
Znrf1	0.0250979	-0.0788924	0.141	0.198	1
Ppil1	0.0251594	0.109756	0.485	0.403	1
Cd53	0.0253704	-0.13715	0.846	0.882	1
E2f6	0.0253759	-0.0582399	0.067	0.112	1
Lage3	0.0255384	0.083773	0.582	0.498	1
Zfr	0.0255544	-0.110143	0.371	0.435	1
Mrpl41	0.0255617	0.0950198	0.615	0.518	1
Pfdn2	0.0258545	0.0732652	0.81	0.754	1
Etfb	0.0258599	0.114907	0.902	0.863	1
Ddx28	0.025907	0.0390595	0.177	0.115	1
Fdx1	0.0260101	0.0793615	0.555	0.454	1
2310061I04Rik	0.0261521	0.0343795	0.166	0.105	1
Fam136a	0.0262149	0.103407	0.36	0.288	1
Mettl4	0.0262848	0.0202783	0.121	0.07	1
Trnau1ap	0.0263487	0.103162	0.53	0.45	1
Junb	0.0264302	-0.13104	0.87	0.85	1
Pclaf	0.0265018	0.130409	0.895	0.837	1
Map3k4	0.0265406	0.0666557	0.275	0.198	1
Unc119	0.0265565	0.110445	0.758	0.693	1
Dlgap5	0.0266137	-0.243071	0.506	0.524	1
Igfbp7	0.0266754	0.123373	0.235	0.169	1
Slc25a3	0.0266986	0.0879136	0.996	0.978	1
Gar1	0.026749	0.103746	0.591	0.492	1
Ifnar2	0.0268271	-0.13208	0.336	0.412	1
Ssbp1	0.0272127	0.113834	0.823	0.78	1
Rbx1	0.0272438	0.0676453	0.991	0.99	1
Cuta	0.0272478	0.0803622	0.794	0.719	1
Ift80	0.0274104	-0.0918021	0.094	0.141	1
Oxct1	0.0274158	0.085464	0.749	0.684	1
Fmnl1	0.0274218	-0.147534	0.667	0.703	1
Pgp	0.0274411	0.0893307	0.416	0.332	1
Sp110	0.0274425	-0.169751	0.642	0.671	1
Dars	0.0274676	0.0789172	0.481	0.403	1
Csgalnact2	0.0275389	0.0307617	0.105	0.058	1
Kmt2d	0.027636	-0.100824	0.172	0.233	1
Msmo1	0.027745	0.0643456	0.257	0.192	1
Hras	0.0277598	0.0929061	0.727	0.645	1
Trmt61a	0.0277629	0.0465393	0.132	0.08	1
Osbpl5	0.0277711	-0.0568248	0.076	0.125	1
1500015A07Rik	0.0278336	-0.102642	0.134	0.188	1
Epb41	0.0279011	-0.0838261	0.244	0.313	1
Nudt2	0.0279028	0.089409	0.338	0.262	1
Ep300	0.0279491	-0.158083	0.407	0.466	1
Xpot	0.0280281	0.0871976	0.378	0.3	1
Atp6v1f	0.028039	0.105138	0.957	0.936	1
Celf2	0.0280733	-0.155226	0.955	0.933	1
Sac3d1	0.0281694	0.0617945	0.166	0.112	1
Coq3	0.0281937	0.0557323	0.199	0.134	1
Metap1d	0.0282778	-0.043675	0.067	0.112	1
Gucd1	0.0282994	-0.0359959	0.092	0.144	1
Smim26	0.0283291	0.0437167	0.421	0.326	1
5430427O19Rik	0.0283835	-0.0685145	0.065	0.109	1
Clp1	0.0284095	0.062319	0.21	0.147	1
Enpp1	0.0287158	0.056856	0.19	0.128	1
Tars2	0.0287577	0.0670092	0.201	0.141	1
Abracl	0.0287775	0.0835397	0.993	0.99	1
Ids	0.0288119	-0.0704989	0.085	0.131	1
Eif2b1	0.0288163	0.0462125	0.248	0.176	1
Gm11110	0.028829	0.0457913	0.114	0.067	1
Irf1	0.0288717	-0.148573	0.443	0.495	1
Qdpr	0.0289412	0.0389952	0.183	0.121	1
Jmjd7	0.0289722	-0.0697477	0.136	0.192	1
Prmt1	0.029059	0.103663	0.837	0.744	1
Id2	0.0290609	0.105973	0.998	0.987	1
Mrps31	0.029071	0.0566681	0.255	0.185	1
Nup88	0.0290803	0.063048	0.358	0.281	1
Rpl3	0.029098	0.0661914	0.998	1	1
Tmco3	0.0291652	-0.0503203	0.087	0.137	1
Ctdsp1	0.0292513	-0.0720842	0.197	0.259	1
Dhrs7	0.0293249	0.0904337	0.604	0.521	1
Zfp637	0.0294067	0.048274	0.143	0.089	1
Wdr44	0.0294688	-0.0917705	0.179	0.233	1
Aga	0.0294807	0.0680976	0.262	0.192	1
Mink1	0.0295224	0.0926017	0.226	0.166	1
Tomm5	0.0296139	0.10902	0.884	0.815	1
Dazap2	0.0297398	-0.108122	0.801	0.84	1
4932422M17Rik	0.0297548	-0.0606173	0.067	0.112	1
Hnrnpk	0.0297727	0.0956754	0.987	0.968	1
Tma16	0.0298065	0.0607675	0.257	0.192	1
Gtf2h3	0.0298138	0.0507747	0.257	0.188	1
Phf10	0.029818	0.0637354	0.206	0.144	1
Gse1	0.0299127	-0.0794374	0.141	0.198	1
Bud13	0.0299905	-0.0918238	0.083	0.128	1
Zfp36l1	0.0300283	-0.239136	0.544	0.569	1
Atp1b3	0.0300537	-0.142439	0.72	0.754	1
Gtf3a	0.0300951	0.0740606	0.584	0.495	1
Stag2	0.0301306	-0.0952363	0.441	0.511	1
Immp1l	0.0301321	0.0758808	0.557	0.482	1
Rsbn1l	0.03014	-0.14208	0.74	0.77	1
Hnrnpul1	0.0301511	-0.130625	0.62	0.668	1
Rrp8	0.0302684	0.0720041	0.318	0.246	1
Dnaja1	0.0303539	-0.12166	0.937	0.942	1
Saraf	0.0305315	-0.168752	0.794	0.812	1
Rab3gap1	0.0306189	0.0795516	0.322	0.252	1
Gabarapl2	0.0306343	0.0796798	0.893	0.834	1
Lman1	0.0307189	0.0785417	0.595	0.521	1
Ndufb9	0.0307331	0.0928507	0.991	0.962	1
Msh2	0.0307409	0.0474488	0.275	0.201	1
Tbc1d15	0.0308036	-0.0619766	0.201	0.275	1
Limd1	0.0308246	-0.127343	0.351	0.409	1
Elf4	0.0309052	-0.0979485	0.32	0.38	1
Cfap97	0.0310427	0.0562604	0.293	0.22	1
Irf7	0.0311282	-0.229674	0.38	0.431	1
Tmem30a	0.0311375	0.111293	0.796	0.76	1
Bag1	0.0312072	0.103426	0.913	0.866	1
Hbs1l	0.0312214	0.0585844	0.338	0.256	1
Alyref	0.0315033	0.088089	0.821	0.776	1
Rhoh	0.0315557	-0.162525	0.81	0.831	1
Ptdss2	0.031562	0.0428975	0.119	0.07	1
Rtraf	0.0317537	0.0932289	0.966	0.942	1
9430038I01Rik	0.0318102	0.0468284	0.145	0.093	1
Rfc5	0.0318302	0.072689	0.492	0.393	1
Bag5	0.0320061	0.0582929	0.201	0.141	1
Tnrc6c	0.0320099	-0.154952	0.454	0.511	1
Zbtb37	0.0320459	0.0376853	0.105	0.061	1
G3bp1	0.0321591	0.0808877	0.886	0.869	1
Mff	0.0323891	0.0918926	0.644	0.565	1
Paox	0.0324591	0.0535168	0.141	0.089	1
Rpl17	0.0325569	-0.0487579	1	1	1
Ppp3r1	0.0326967	0.11537	0.421	0.342	1
Sqle	0.0327076	0.0560027	0.154	0.102	1
Itk	0.0327311	-0.148488	0.68	0.677	1
Vps37a	0.0328801	0.0644834	0.242	0.176	1
Os9	0.0329022	-0.124018	0.658	0.684	1
Tmem167	0.0329571	0.0752072	0.946	0.917	1
Rnf213	0.0331471	-0.191038	0.304	0.361	1
Nxf1	0.0332884	-0.0849832	0.664	0.693	1
Nfx1	0.0332887	-0.122594	0.257	0.31	1
Mrpl27	0.0333819	0.0603941	0.64	0.546	1
Tecr	0.0334376	0.073034	0.839	0.792	1
Lat2	0.0334897	0.0868053	0.772	0.703	1
Ms4a6b	0.0334957	-0.134189	0.998	0.994	1
C730034F03Rik	0.0335561	-0.0791129	0.132	0.188	1
Klhl25	0.0335585	0.0311536	0.121	0.073	1
Gnptg	0.0335778	0.0748261	0.438	0.355	1
Ciapin1	0.0336457	0.125421	0.761	0.674	1
Fbxl6	0.0336807	0.0767587	0.362	0.284	1
Mlf2	0.033706	0.092179	0.647	0.572	1
Gna13	0.0337951	-0.146201	0.463	0.54	1
Pdxp	0.0338494	0.0449713	0.11	0.064	1
Atp11b	0.033866	-0.164972	0.647	0.668	1
Ssu72	0.0338836	0.0900268	0.913	0.895	1
Rfc3	0.0339137	0.0717184	0.327	0.246	1
Nomo1	0.0339825	0.0525475	0.188	0.131	1
Psmc2	0.0340161	0.108183	0.79	0.744	1
Eral1	0.0340764	0.0390287	0.11	0.064	1
Aida	0.0340788	0.0706764	0.358	0.281	1
Tapbp	0.0341506	-0.138813	0.758	0.767	1
Ftl1	0.0341722	0.0970816	1	0.997	1
N6amt1	0.0342295	0.0780938	0.255	0.192	1
Ltv1	0.0342942	0.0626629	0.32	0.243	1
Dtymk	0.0344552	0.111545	0.66	0.597	1
Gm31597	0.0344743	0.0731924	0.195	0.137	1
Mxd4	0.034513	-0.127287	0.371	0.435	1
Sms	0.0347049	0.0746773	0.881	0.847	1
Psmd6	0.0347153	0.106726	0.758	0.69	1
Rnf145	0.0347299	-0.131706	0.226	0.281	1
Gcdh	0.0348155	0.060088	0.181	0.125	1
Hibadh	0.0348889	0.0754556	0.264	0.195	1
Borcs5	0.034998	0.0706554	0.204	0.147	1
Gpr107	0.0350614	0.0753991	0.277	0.211	1
Mrps26	0.0351303	0.0731035	0.828	0.748	1
Phb2	0.0352515	0.0871095	0.904	0.853	1
G6pdx	0.0352565	-0.0556211	0.101	0.15	1
Hdlbp	0.035364	0.063255	0.584	0.479	1
Mirt1	0.0354322	-0.0822151	0.065	0.105	1
Gsr	0.0354387	0.0824103	0.318	0.243	1
Cct8	0.0355638	0.0956571	0.897	0.875	1
Npepl1	0.0356187	0.0777503	0.387	0.31	1
Ggh	0.0356734	0.0256445	0.237	0.173	1
Stk38	0.0356736	-0.155485	0.362	0.403	1
Mkln1	0.0357342	-0.111356	0.421	0.489	1
Lars	0.0357834	0.0646648	0.43	0.355	1
Snx2	0.0357905	-0.125876	0.418	0.46	1
Wdr76	0.0357976	0.0471419	0.215	0.153	1
Hsd17b11	0.0358669	-0.0606402	0.065	0.105	1
Lsm5	0.0359585	0.0997756	0.964	0.917	1
Tfrc	0.0360121	0.0764372	0.315	0.246	1
Fuca1	0.0360292	0.0482476	0.541	0.438	1
Nfkb1	0.0360619	-0.123238	0.492	0.553	1
Kctd20	0.0361146	0.0468052	0.217	0.153	1
Fkbp4	0.0361853	0.0560182	0.566	0.47	1
Bsg	0.0362204	0.109443	0.926	0.888	1
Chid1	0.0363375	0.0614263	0.172	0.118	1
Diexf	0.0363814	0.0445248	0.121	0.073	1
Gnb2	0.0364784	0.0527769	0.966	0.965	1
Tmem248	0.0365308	0.0879669	0.327	0.259	1
Ndufb5	0.0366513	0.0751788	0.96	0.898	1
Eif3c	0.0367881	-0.0841934	0.96	0.939	1
1110032F04Rik	0.0369737	0.0474898	0.132	0.083	1
Usp19	0.0370009	-0.111699	0.331	0.39	1
Pop1	0.0371351	0.0469787	0.116	0.07	1
Fam117a	0.0371567	-0.0707154	0.069	0.112	1
Arfip2	0.0371864	0.0393911	0.183	0.125	1
Heatr6	0.0372981	0.0495646	0.338	0.256	1
Wdr75	0.0373645	0.0345911	0.338	0.259	1
Naa38	0.0375036	0.0631729	0.765	0.674	1
Zfp654	0.0375579	-0.0671254	0.163	0.22	1
Stip1	0.0375603	0.0946801	0.662	0.585	1
Gstcd	0.0377551	0.0233292	0.101	0.058	1
Emc10	0.0378368	0.0835041	0.685	0.594	1
Ssna1	0.0378638	0.0802503	0.774	0.687	1
Evl	0.0378682	-0.123975	0.57	0.601	1
Fcrl6	0.0378844	0.0512219	0.28	0.204	1
Lgals1	0.0379808	0.0439199	1	1	1
Slc9a3r1	0.0380115	-0.110907	0.611	0.7	1
Rps20	0.0380898	0.0542954	1	1	1
Anapc1	0.0381008	-0.0901476	0.26	0.329	1
Preb	0.0382208	0.0467629	0.329	0.252	1
2010315B03Rik	0.0382531	-0.0738286	0.168	0.224	1
Cmss1	0.0383472	0.0552981	0.356	0.278	1
Dynlt1f	0.0383968	0.0728567	0.53	0.447	1
Gm5914	0.0385621	-0.0911798	0.154	0.211	1
Rabep1	0.0386659	0.103614	0.479	0.415	1
Ppp6c	0.038691	0.102729	0.539	0.47	1
Zfand6	0.0387637	-0.135119	0.649	0.674	1
Exosc4	0.0388513	0.070775	0.57	0.476	1
Rnaseh2c	0.0388935	0.1076	0.917	0.879	1
Maf	0.038898	-0.123103	0.063	0.102	1
Phf5a	0.0389222	0.112877	0.805	0.751	1
Higd1a	0.0391803	0.122873	0.893	0.859	1
Srrm1	0.0392554	0.0416664	0.895	0.863	1
Abi3	0.0393636	0.0559682	0.141	0.093	1
H3f3a	0.0395797	0.0650951	0.996	0.99	1
Rlf	0.0395961	-0.172465	0.485	0.508	1
Uqcrc2	0.039626	0.116953	0.828	0.76	1
Kdm3a	0.039733	-0.0483926	0.101	0.15	1
Ralbp1	0.0397513	0.0522707	0.817	0.748	1
Nr4a2	0.0398972	0.107526	0.758	0.658	1
Srfbp1	0.040046	0.0613539	0.197	0.137	1
Zfp317	0.0400578	0.0275369	0.11	0.064	1
Tmbim1	0.0400588	0.0511151	0.174	0.118	1
Gadd45b	0.0400606	-0.0628151	0.219	0.284	1
Nin	0.0401236	-0.103262	0.264	0.329	1
Mcm3ap	0.0401811	-0.0630753	0.145	0.204	1
Dcaf5	0.0403583	-0.0872303	0.139	0.192	1
Cxxc1	0.0404323	-0.0668662	0.217	0.278	1
Parp14	0.0404879	-0.183208	0.53	0.591	1
Hddc3	0.0406857	0.0627861	0.186	0.131	1
Ip6k1	0.0407289	-0.0975771	0.157	0.204	1
Uqcc2	0.0407445	0.104417	0.866	0.827	1
Nedd4	0.0408763	0.0687341	0.405	0.326	1
Pyroxd1	0.0410932	-0.0464497	0.101	0.15	1
D8Ertd738e	0.041154	0.0847325	0.955	0.936	1
Ube2b	0.04118	-0.145791	0.893	0.907	1
Timm17b	0.0412968	0.0973928	0.7	0.652	1
Arl4c	0.0413578	-0.295951	0.349	0.399	1
Arhgap4	0.0414895	-0.117257	0.3	0.358	1
Ddt	0.0415259	0.0847414	0.821	0.767	1
D3Ertd751e	0.0415465	0.0518787	0.134	0.086	1
Ahsa2	0.0416315	0.0514558	0.333	0.259	1
Rrm2	0.0416417	0.0250191	0.34	0.272	1
Actr8	0.0416825	0.0455062	0.201	0.141	1
Spryd3	0.0417559	0.0597259	0.246	0.182	1
Nedd8	0.0417865	0.0793005	0.973	0.968	1
Rapgef6	0.0418472	-0.14318	0.541	0.578	1
Csrp2	0.0418686	0.0464007	0.157	0.102	1
Hmces	0.0418766	0.0684007	0.306	0.24	1
Arl1	0.0418936	0.0821876	0.772	0.703	1
Med29	0.0419389	0.0878643	0.416	0.335	1
Hnrnpa2b1	0.0420426	-0.085756	0.998	0.99	1
Lonp1	0.0420452	0.0358112	0.192	0.131	1
Cd3d	0.0420596	0.0603532	1	0.997	1
Stub1	0.042107	0.0588585	0.55	0.45	1
Smarcd2	0.04211	-0.0716748	0.391	0.46	1
Elovl1	0.0422867	0.0251284	0.546	0.441	1
Tbcel	0.0423321	-0.0807741	0.172	0.23	1
Ifi27l2a	0.042352	-0.268193	0.904	0.898	1
Bcl7c	0.0423853	0.0641065	0.794	0.693	1
Brwd3	0.0423912	-0.0723685	0.107	0.157	1
Tpd52l2	0.0424813	0.0693803	0.557	0.47	1
Ccdc58	0.0425713	0.0661892	0.309	0.233	1
2810001G20Rik	0.0427081	-0.099348	0.168	0.22	1
Utrn	0.0427705	-0.131266	0.36	0.422	1
Rpl14	0.0428804	0.0863108	1	0.997	1
Smpd4	0.0429071	-0.00473891	0.103	0.058	1
Gpr68	0.042947	-0.0806253	0.342	0.399	1
Camta1	0.0430565	0.0888592	0.311	0.243	1
Gm20186	0.0431188	-0.078598	0.087	0.131	1
Kctd10	0.0431476	-0.0994561	0.253	0.307	1
Parp10	0.0432484	-0.0930483	0.179	0.23	1
Wdr43	0.0432722	0.0729833	0.602	0.514	1
Nabp2	0.0433917	-0.115236	0.566	0.629	1
Atp5d	0.0434523	0.0564152	0.991	0.978	1
Scyl2	0.0434939	-0.0857953	0.157	0.211	1
Naa35	0.0435554	0.0904386	0.331	0.268	1
Zswim7	0.0436191	0.0450724	0.11	0.067	1
Tab2	0.0437484	-0.121505	0.512	0.559	1
Lbr	0.0437496	-0.136526	0.732	0.735	1
Midn	0.0438339	-0.106047	0.273	0.329	1
Mon2	0.0442079	-0.0577952	0.136	0.188	1
Fip1l1	0.0442084	-0.154164	0.678	0.716	1
Fam26f	0.0442312	-0.13811	0.338	0.383	1
Nudt13	0.0442695	0.0359536	0.107	0.064	1
Zfp217	0.0442924	-0.0773138	0.096	0.141	1
Dcps	0.0443224	0.0711093	0.653	0.575	1
Dync1h1	0.0445434	0.107017	0.356	0.284	1
Pnkp	0.0446503	0.0383596	0.349	0.262	1
Arhgap9	0.0446809	-0.166116	0.837	0.84	1
Hgh1	0.044748	0.0401123	0.125	0.08	1
Xpnpep1	0.0447826	0.0653464	0.409	0.329	1
Rpl5	0.0448843	-0.079392	1	0.994	1
Memo1	0.0449495	0.0454731	0.313	0.246	1
Zdhhc2	0.044988	0.045939	0.432	0.345	1
Klra3	0.0450297	0.245993	0.19	0.137	1
Smyd2	0.0452605	0.0492992	0.188	0.131	1
Zmat5	0.0452698	0.0809181	0.591	0.502	1
Dusp1	0.0453586	-0.0998261	0.284	0.342	1
Lactb2	0.0453894	0.0560331	0.224	0.163	1
H3f3b	0.0454971	0.0543568	1	1	1
Cdk19	0.0455333	-0.126819	0.226	0.284	1
Eif2s1	0.0455426	0.104645	0.848	0.808	1
Myo1g	0.0456426	-0.11248	0.624	0.677	1
Lmf2	0.045654	-0.0770901	0.208	0.265	1
Cars2	0.0457811	0.0518072	0.228	0.163	1
Kpna3	0.0458237	-0.0778925	0.266	0.326	1
Get4	0.0458986	0.0605424	0.306	0.233	1
Mtx2	0.0459562	0.0505427	0.28	0.217	1
Uevld	0.0460792	-0.07072	0.121	0.169	1
Immt	0.0462734	0.0891218	0.611	0.55	1
Brd9	0.0462783	-0.115064	0.494	0.546	1
Ptpa	0.046314	0.0792731	0.635	0.553	1
Yif1a	0.0463241	0.0599323	0.407	0.326	1
Il2rb	0.0463367	0.0871361	0.991	0.971	1
Psma7	0.0463738	0.0730378	0.984	0.99	1
Parvg	0.0468343	-0.13172	0.394	0.444	1
Runx1	0.0469848	-0.0604326	0.089	0.134	1
Acbd3	0.0470011	0.0472122	0.45	0.361	1
Atf6b	0.0470476	0.0631812	0.298	0.236	1
Neat1	0.0473218	-0.214617	0.541	0.601	1
Pde4a	0.047375	0.0426826	0.11	0.067	1
Ddx21	0.0474685	-0.118154	0.711	0.754	1
Rnf8	0.0475895	0.0320674	0.107	0.064	1
Brd8	0.0477086	-0.160234	0.389	0.435	1
Sdhaf4	0.0479221	0.0440203	0.309	0.236	1
Cep55	0.0480471	-0.155976	0.6	0.62	1
Smap2	0.0480799	0.100467	0.727	0.693	1
Prps1l3	0.0482301	0.0266341	0.174	0.118	1
Rpl41	0.048247	-0.061073	1	1	1
Clptm1l	0.0482594	-0.0855668	0.508	0.556	1
Mrpl34	0.0483157	0.0805768	0.689	0.62	1
Ezh1	0.0483372	-0.0757453	0.163	0.217	1
Plek	0.0484042	0.0611658	0.758	0.655	1
Sfxn1	0.0484377	0.080407	0.617	0.55	1
Gm16286	0.0485067	0.111863	0.74	0.661	1
3110040N11Rik	0.0485325	0.0629141	0.295	0.224	1
Mrps16	0.0485658	0.0963158	0.966	0.901	1
Eif1ax	0.0485959	0.0880015	0.85	0.827	1
Creld2	0.0486204	0.0339454	0.535	0.425	1
Cabin1	0.0488913	0.0752575	0.544	0.46	1
2810474O19Rik	0.0488931	-0.150727	0.535	0.562	1
Pithd1	0.04903	0.0704937	0.248	0.188	1
Yipf5	0.0492043	0.0491668	0.376	0.3	1
AI467606	0.0492195	-0.0634733	0.125	0.173	1
Echs1	0.0492454	0.0590351	0.483	0.393	1
Rpe	0.049334	0.0865055	0.409	0.335	1
Gm9856	0.049347	0.035017	0.186	0.131	1
Socs3	0.0493604	-0.0426608	0.063	0.102	1
Cd101	0.0493702	-0.0532146	0.072	0.112	1
Sdcbp	0.0494524	-0.13649	0.74	0.767	1
Pea15a	0.049692	-0.0844099	0.199	0.256	1
Lgals8	0.049692	-0.0797558	0.199	0.256	1
Gmds	0.0498429	0.0470854	0.291	0.22	1
Pttg1ip	0.0498497	-0.0769454	0.248	0.307	1
Iqgap1	0.0500637	-0.150974	0.888	0.901	1
Znhit2	0.050205	0.0800391	0.219	0.166	1
Rbm42	0.0502894	-0.125469	0.649	0.668	1
Zfpl1	0.0503276	0.0526574	0.26	0.195	1
Bmpr2	0.0503433	0.039568	0.139	0.089	1
Kdm4a	0.0503509	-0.0810971	0.128	0.173	1
Fnbp1	0.050434	-0.127672	0.64	0.652	1
Sar1a	0.0505237	0.0772811	0.718	0.649	1
Fam96a	0.0506741	0.105158	0.866	0.831	1
Zfp511	0.0506786	0.0791184	0.479	0.39	1
Eci2	0.050726	0.063324	0.535	0.457	1
Samsn1	0.0509144	-0.168535	0.868	0.863	1
Bcl9l	0.0511233	-0.0612279	0.103	0.147	1
Msi2	0.0512297	0.0715272	0.468	0.387	1
Igsf5	0.0512975	0.0383035	0.101	0.061	1
Hnrnph1	0.0514593	-0.126928	0.785	0.77	1
Spcs1	0.0515035	0.0962632	0.906	0.847	1
Tpi1	0.0516026	0.134146	0.944	0.891	1
Sephs2	0.0517091	0.0445218	0.479	0.393	1
Ubl4a	0.0518227	0.100931	0.638	0.581	1
Vamp7	0.051878	-0.0787705	0.242	0.294	1
Zfp280d	0.0519416	0.0784437	0.253	0.201	1
Spred1	0.0521779	0.0452552	0.112	0.07	1
Atp5h	0.0523872	0.0688849	0.991	0.984	1
Pinx1	0.0524928	0.0662765	0.201	0.15	1
Trps1	0.0525048	0.0825127	0.394	0.323	1
0610010K14Rik	0.0525313	0.0713642	0.506	0.425	1
Hells	0.0526237	0.0587552	0.497	0.422	1
Zfp950	0.052905	0.0838897	0.174	0.125	1
Drg2	0.0530257	0.0387915	0.289	0.214	1
Selenok	0.0533063	0.0829683	0.975	0.946	1
Ctnnbl1	0.0533483	0.0521866	0.492	0.403	1
H13	0.0534822	0.0473471	0.678	0.594	1
Tfe3	0.0535379	0.0581843	0.107	0.067	1
Cebpzos	0.0536733	0.0652907	0.452	0.364	1
Rbm25	0.0537381	-0.0958312	0.864	0.85	1
Ube2m	0.0537698	0.0670954	0.77	0.671	1
Phtf2	0.0537748	0.0473303	0.123	0.08	1
Kmt5b	0.053812	-0.10858	0.226	0.281	1
Ada	0.0539092	0.0902715	0.273	0.22	1
Psmd11	0.0541067	0.0816131	0.787	0.751	1
Lsm3	0.0542056	0.08977	0.747	0.684	1
Acp5	0.054234	-0.130977	0.313	0.361	1
Dnajc2	0.0544006	0.0413468	0.843	0.776	1
Cct7	0.0544689	0.0843667	0.944	0.92	1
Tob2	0.054513	-0.121289	0.345	0.39	1
Ckap2	0.0546226	-0.195451	0.409	0.45	1
Gbp2b	0.0547727	-0.0964949	0.204	0.259	1
1700017B05Rik	0.0547881	0.0326038	0.452	0.38	1
Hus1	0.0549785	0.0392232	0.128	0.083	1
Tuba1c	0.055137	0.17392	0.662	0.594	1
Polg	0.0551943	0.0529906	0.159	0.109	1
Suds3	0.0552002	0.061509	0.568	0.498	1
Taok1	0.0553064	-0.0979177	0.289	0.345	1
Lancl1	0.0553271	0.0639293	0.235	0.179	1
Pam16	0.0554398	0.114558	0.738	0.687	1
Tfpt	0.0554647	0.0219663	0.224	0.16	1
Grpel1	0.0555516	0.0879097	0.718	0.655	1
Trap1	0.0556166	0.0735395	0.338	0.268	1
Snx12	0.0556523	0.0739552	0.315	0.252	1
Nmt1	0.0556528	-0.129937	0.705	0.693	1
Wdcp	0.0557638	0.0594794	0.125	0.083	1
Pik3cd	0.0558835	-0.128743	0.57	0.594	1
Ccm2	0.0559741	-0.114558	0.262	0.307	1
Klhl9	0.0560676	-0.0730958	0.233	0.291	1
Selplg	0.0561138	-0.122328	0.955	0.952	1
Ezr	0.0562525	-0.100212	0.884	0.904	1
Med31	0.0562865	0.0755074	0.333	0.265	1
Mthfd2	0.0562976	0.0765034	0.577	0.505	1
Inpp4a	0.0564682	-0.0492748	0.081	0.121	1
Jam2	0.0566885	0.0228717	0.141	0.093	1
Stard4	0.0567189	0.0512557	0.443	0.358	1
Rpa2	0.0569734	0.0642502	0.682	0.62	1
Imp4	0.0570654	0.0724819	0.555	0.473	1
Vps29	0.0570693	0.0827557	0.877	0.815	1
Tcf20	0.0571349	-0.0795061	0.242	0.3	1
Tmem123	0.0572439	0.0763714	0.624	0.556	1
Hist2h2aa1	0.0573577	-0.0465107	0.067	0.105	1
Cenps	0.057373	0.0697173	0.264	0.201	1
Atxn10	0.0574596	0.0733886	0.647	0.604	1
Isyna1	0.0575052	0.0672318	0.405	0.335	1
Ndufb2	0.0576743	0.102263	0.819	0.792	1
Srek1ip1	0.0578596	0.056501	0.441	0.358	1
Ociad2	0.0578795	0.0358078	0.342	0.265	1
Cenpl	0.0579064	-0.0688995	0.192	0.249	1
Asap1	0.0579242	-0.117896	0.174	0.22	1
Eif6	0.0579666	0.0911889	0.832	0.821	1
Nup155	0.058158	0.0531226	0.134	0.093	1
Mrpl9	0.0582304	0.0490934	0.622	0.527	1
Txndc11	0.0582707	0.0449218	0.183	0.131	1
Txnip	0.0582896	-0.194022	0.43	0.463	1
Rgs2	0.0583603	0.0933304	0.539	0.463	1
Eloc	0.0584984	0.0659334	0.949	0.933	1
Snrpa1	0.0586297	0.0829413	0.85	0.789	1
Polr3f	0.0588125	0.0543537	0.199	0.144	1
Sun2	0.0588656	-0.193858	0.515	0.572	1
Rnpep	0.0588834	0.0764903	0.468	0.399	1
Xlr4b	0.0589281	0.0647544	0.55	0.466	1
Il18r1	0.0590195	-0.268491	0.579	0.597	1
Adssl1	0.0590613	0.0727446	0.168	0.121	1
Dcaf12	0.0591323	-0.0859875	0.239	0.291	1
Rbbp8	0.0592376	0.0794447	0.322	0.256	1
Cct2	0.059273	0.0824679	0.955	0.946	1
Git2	0.0593423	-0.118856	0.474	0.521	1
4833403J16Rik	0.0594483	-0.052018	0.134	0.185	1
Phf2	0.059579	0.037124	0.123	0.08	1
Tcf3	0.0596123	0.0709992	0.427	0.355	1
Chrac1	0.0597715	0.071083	0.613	0.53	1
Mrpl50	0.0598021	0.0616555	0.362	0.297	1
Klhl24	0.0599146	-0.0651596	0.154	0.204	1
Adam19	0.0599579	0.0819577	0.452	0.371	1
Pde12	0.0599952	0.0214226	0.257	0.188	1
Noc4l	0.0600684	0.0527684	0.309	0.24	1
Gorasp2	0.0600728	0.0431399	0.369	0.3	1
Ilf2	0.0601796	0.0561862	0.622	0.553	1
Cd84	0.0601894	-0.110543	0.405	0.473	1
Kctd9	0.0603207	0.0451607	0.186	0.131	1
Hist4h4	0.0603874	-0.15756	0.224	0.265	1
Psmf1	0.0604115	0.0581446	0.329	0.265	1
Foxp1	0.0604285	-0.155958	0.351	0.396	1
Smad7	0.0604451	-0.161695	0.454	0.489	1
Selenow	0.0605878	0.0739903	0.991	0.968	1
Nolc1	0.0607945	0.0725592	0.447	0.374	1
Bod1l	0.0608702	0.103724	0.609	0.546	1
H2-T22	0.060884	-0.163226	0.973	0.958	1
Pmpcb	0.0609433	0.076072	0.517	0.444	1
Phgdh	0.0609993	0.0810413	0.823	0.728	1
Arf5	0.0610042	0.059597	0.991	0.997	1
Rpl7l1	0.0611315	0.0880228	0.671	0.594	1
Snx19	0.061196	0.0598777	0.136	0.093	1
Cep135	0.0612617	0.0558001	0.163	0.115	1
Gpatch2l	0.0613731	-0.0679746	0.092	0.131	1
Orc6	0.061502	0.0940919	0.362	0.297	1
Fkbp2	0.0615122	0.0753257	0.917	0.882	1
Slc37a2	0.0615418	0.055937	0.157	0.109	1
Elovl5	0.0616762	-0.043091	0.154	0.208	1
Hdgf	0.0618222	-0.144778	0.922	0.917	1
Mboat7	0.0618936	-0.0674656	0.152	0.198	1
2022-03-02	0.0619818	0.0497366	0.74	0.69	1
Snrnp200	0.0620577	-0.111412	0.443	0.479	1
Ncl	0.062241	0.0803135	0.987	0.971	1
Exosc8	0.0623067	0.0830015	0.837	0.764	1
Bcl2l11	0.0624827	-0.128681	0.389	0.435	1
Rplp0	0.0625251	0.0589673	1	1	1
Snrpc	0.0625336	-0.0960201	0.85	0.879	1
Ube2e1	0.0625443	0.0767824	0.613	0.527	1
Kpna2	0.0626074	0.0420364	0.302	0.233	1
Mef2d	0.0628765	-0.0855478	0.284	0.342	1
Kctd12	0.0631032	-0.0742065	0.089	0.131	1
Stk17b	0.0631367	-0.136691	0.944	0.933	1
Gbp4	0.0631846	-0.0938676	0.749	0.812	1
Sik2	0.0632544	0.0358096	0.132	0.086	1
Spout1	0.0632586	0.0582367	0.15	0.105	1
Sfxn2	0.063281	0.0488872	0.11	0.07	1
Guk1	0.0632811	0.0853831	0.541	0.46	1
Stk32c	0.0635879	0.0544332	0.197	0.144	1
Ppan	0.0635939	0.0412644	0.421	0.351	1
Zfp809	0.0636323	0.0358495	0.13	0.086	1
Clint1	0.063745	-0.148348	0.497	0.53	1
Fyco1	0.0640342	0.0165335	0.266	0.201	1
Paip2	0.0640666	-0.146999	0.899	0.888	1
Blzf1	0.0640868	0.03117	0.119	0.077	1
Borcs7	0.0643946	0.0476514	0.262	0.198	1
Arhgef1	0.0644039	-0.100924	0.765	0.818	1
Ccdc82	0.0644656	0.0219741	0.387	0.31	1
Mad2l2	0.0645192	0.0466332	0.21	0.153	1
Tpm4	0.0647248	0.0695794	0.761	0.7	1
Nup62	0.064819	0.0408666	0.244	0.182	1
Tm7sf3	0.0650125	0.0436858	0.224	0.166	1
Cyfip1	0.0651954	0.0674517	0.255	0.198	1
Cacfd1	0.0653149	0.0460181	0.132	0.089	1
S1pr4	0.0653759	-0.121466	0.369	0.419	1
Mtap	0.0654445	0.0552144	0.347	0.272	1
Dnajc21	0.0654597	0.062525	0.517	0.431	1
Zbtb33	0.0655847	-0.0602103	0.087	0.128	1
Fdxr	0.0656619	-0.0806336	0.289	0.348	1
Bin1	0.0656746	0.0658933	0.826	0.748	1
Ociad1	0.0657136	-0.0715681	0.729	0.751	1
Samd4b	0.0657218	0.0368109	0.152	0.105	1
Trmt11	0.0657764	0.0354062	0.166	0.115	1
Mmgt1	0.0658087	0.0398799	0.101	0.064	1
Appl1	0.0659276	0.0517981	0.461	0.374	1
Mnd1	0.0660143	0.0650701	0.275	0.217	1
Cd44	0.066043	-0.116267	0.474	0.514	1
Mindy3	0.0660564	0.0836315	0.477	0.403	1
Gpaa1	0.0662098	0.0432827	0.298	0.233	1
Ptprs	0.0663024	0.0653602	0.215	0.163	1
Plekhg3	0.0664225	-0.0625876	0.072	0.109	1
Cbx3	0.0665923	-0.0808873	0.957	0.962	1
Ddx18	0.0665941	0.0545567	0.629	0.55	1
Ankrd11	0.066768	-0.124609	0.837	0.834	1
Ppp2r3c	0.0669262	0.0784402	0.367	0.304	1
Emp3	0.067192	-0.237297	0.729	0.757	1
Usp47	0.0672458	0.0541958	0.385	0.316	1
Banf1	0.0672558	0.10711	0.915	0.888	1
Mbd2	0.0672904	0.0634695	0.922	0.869	1
Triobp	0.0672935	-0.0888692	0.353	0.412	1
Adamts14	0.0673548	0.0597366	0.145	0.102	1
Utp11	0.0674083	0.0959398	0.72	0.636	1
Cnot3	0.0674775	-0.146855	0.609	0.652	1
Fam49b	0.0675286	0.0918631	0.899	0.847	1
Iqgap2	0.0675959	-0.127254	0.172	0.22	1
Aprt	0.0678093	0.0590063	0.964	0.92	1
Ino80e	0.0678683	0.0559676	0.479	0.399	1
Zfp560	0.0680244	0.0412586	0.371	0.307	1
Gabpa	0.0680704	0.0433462	0.365	0.294	1
Msh3	0.068152	0.0425962	0.201	0.147	1
Fam189b	0.0681853	-0.160637	0.405	0.441	1
2022-09-06	0.0683133	-0.0998843	0.794	0.792	1
Ufc1	0.068388	0.0621605	0.866	0.799	1
Zbtb26	0.0684596	0.0388771	0.11	0.07	1
Zfp330	0.0686214	0.0604911	0.602	0.527	1
Adar	0.0687481	-0.123567	0.192	0.243	1
Nceh1	0.068977	-0.0818296	0.174	0.224	1
Sec11a	0.0691288	0.0819313	0.911	0.863	1
Sos1	0.0692605	0.037778	0.107	0.067	1
Pex11b	0.0692618	0.0366061	0.13	0.086	1
Srm	0.0695118	0.0673634	0.271	0.214	1
9930021J03Rik	0.0695682	-0.090437	0.152	0.195	1
Irgm1	0.069663	-0.0910814	0.295	0.348	1
Abcf3	0.0696782	0.0259595	0.121	0.08	1
Srsf11	0.0697124	0.0866483	0.922	0.869	1
Acaca	0.0698291	-0.0450026	0.092	0.134	1
Thap4	0.0698924	0.0491706	0.159	0.112	1
Gatad1	0.0699065	0.0957237	0.64	0.594	1
Slc2a3	0.0699875	0.0950237	0.445	0.383	1
Rnf187	0.0701122	0.079824	0.774	0.712	1
Cetn4	0.0701546	0.0426246	0.132	0.089	1
Spag9	0.0703179	0.0539623	0.57	0.495	1
Kif23	0.0704667	-0.301975	0.367	0.393	1
Parp9	0.0704935	-0.112697	0.345	0.387	1
Stx12	0.0705344	0.0233976	0.195	0.137	1
Ccdc88b	0.0707324	0.0457101	0.3	0.23	1
Gfod1	0.0707455	-0.0841097	0.28	0.332	1
Cst3	0.0708962	0.0717685	0.946	0.904	1
Med7	0.070937	0.0677318	0.264	0.208	1
Pde4dip	0.0711386	-0.0669197	0.076	0.112	1
Rbm19	0.0711709	-0.063187	0.11	0.15	1
G2e3	0.0713045	-0.0582334	0.221	0.281	1
Tnfrsf4	0.0713817	0.138816	0.398	0.351	1
Uhrf1	0.0714507	0.0684002	0.284	0.227	1
[truncated: 5,857 more rows]

## Sheet: Cluster 9
	p_val	avg_log2FC	pct_high	pct.2_low	p_val_adj
[truncated: 7,296 more rows]

[truncated: 2 more sheets: Cluster 12, Cluster 6 and 12 pooled]
